# Supplementary material for: Synthesis of 3,5-bis(fluoroalkyl)pyrazoles/pyrazolines via [3 + 2] cycloaddition of di/trifluoroacetohydrazonoyl bromides and trifluoromethyl-substituted alkenes
Source: Royal Society of Chemistry journal article supplement (doi:10.1039/d4ob01160k), 2024-11-19
Supplement: d4ob01160k1.pdf [file d4ob01160k1.pdf]

## Supporting Information

### Synthesis of 3,5-bis(fluoroalkyl)pyrazoles/pyrazolines from [3+2] cycloaddition of di/trifluoroacetohydrazonoyl bromides and trifluoromethyl-substituted alkenes

Ruikang Wang<sup>1</sup>, Peng Jin<sup>1</sup>, Gaowang Yang<sup>1</sup>, Ying Fan<sup>1</sup>, Zuyu Bai<sup>1</sup>, Danfeng Huang<sup>1</sup>,  
Ke-Hu Wang<sup>1</sup>, Junjiao Wang<sup>1</sup>, Yulai Hu\*<sup>1,2</sup>

<sup>1</sup>College of Chemistry and Chemical Engineering, Northwest Normal University, 967  
Anning East Road, Lanzhou, 730070, China,

<sup>2</sup>State Key Laboratory of Applied Organic Chemistry, Lanzhou, 730000, China

|                                                                             |      |
|-----------------------------------------------------------------------------|------|
| 1. Synthesis of Di/trifluoroacetohydrazonoyl Bromides <b>1</b> .....        | S2   |
| 2. Copies of NMR and HRMS Spectra for Compounds <b>3</b> and <b>B</b> ..... | S3   |
| 3. X-Ray Crystallographic Data of Compounds <b>3n</b> and <b>4j</b> .....   | S118 |

## 1. Synthesis Procedure of Di/trifluoroacetohydrazoneyl Bromides 1<sup>1</sup>

**Step 1:** A mixture of hydrazine hydrochlorides (2.0 mmol, 1.0 equiv.), triethylamine (1.0 mmol, 1.0 equiv.), di/trifluoroacetaldehyde ethyl hemiacetal (1.5 mmol, 1.5 equiv.), and freshly activated molecular sieves 4Å in EtOH (8 mL) was stirred at 75 °C in a round-bottom in an oil bath, and the reaction was monitored by TLC. After the reaction was completed, the solvent was removed in vacuo to afford intermediate products, which was used directly for the next step.

**Step 2:** To a solution of crude mixture from step 1 in DMF (8 mL) was added NBS. The resulting solution was stirred at room temperature, and the reaction was monitored by TLC. After the reaction was completed, the reaction was quenched with sat. NaCl aq., and the mixture was extracted with ethyl acetate (3 x 15 mL), dried over MgSO<sub>4</sub>, filtered, and concentrated in vacuo. The resulting products was purified by column chromatography on silica gel (EA)/petroleum ether (PE) (1:8–1:20) to afford di/trifluoroacetohydrazoneyl bromides.

### References

- (a) T. Han, K.-H. Wang, M. Yang, P. Zhao, F. Wang, J. Wang, D. Huang and Y. Hu, *J. Org. Chem.*, 2022, **87**, 498–511.
- (b) Y. Ren, R. Ma, Y. Feng, K.-H. Wang, J. Wang, D. Huang, X. Lv and Y. Hu, *Asian J. Org. Chem.*, 2022, e202200438.
- (c) Y. Ren, R. Ma, X. Li, K.-H. Wang, J. Wang, D. Huang, X. Lv and Y. Hu, *Tetrahedron*, 2023, **149**, 133711.
- (d) Y. Feng, Y. Ren, D. Tang, K.-H. Wang, J. Wang, D. Huang, X. Lv and Y. Hu, *Org. Biomol. Chem.*, 2024, **22**, 2797–2812.
- (e) X. Li, D. Huang, Y. Zhou, X. Liu, K. Wang, J. Wang and Y. Hu, *Chin. J. Org. Chem.*, 2024, **44**, 1226–1239.

2. Copies of  $^1\text{H}$  NMR,  $^{13}\text{C}$  NMR of products **3**, **3'**, **4** and **4'**

Spectrogram copies of compound **3a**

$^1\text{H}$  NMR copy of compound **3a**

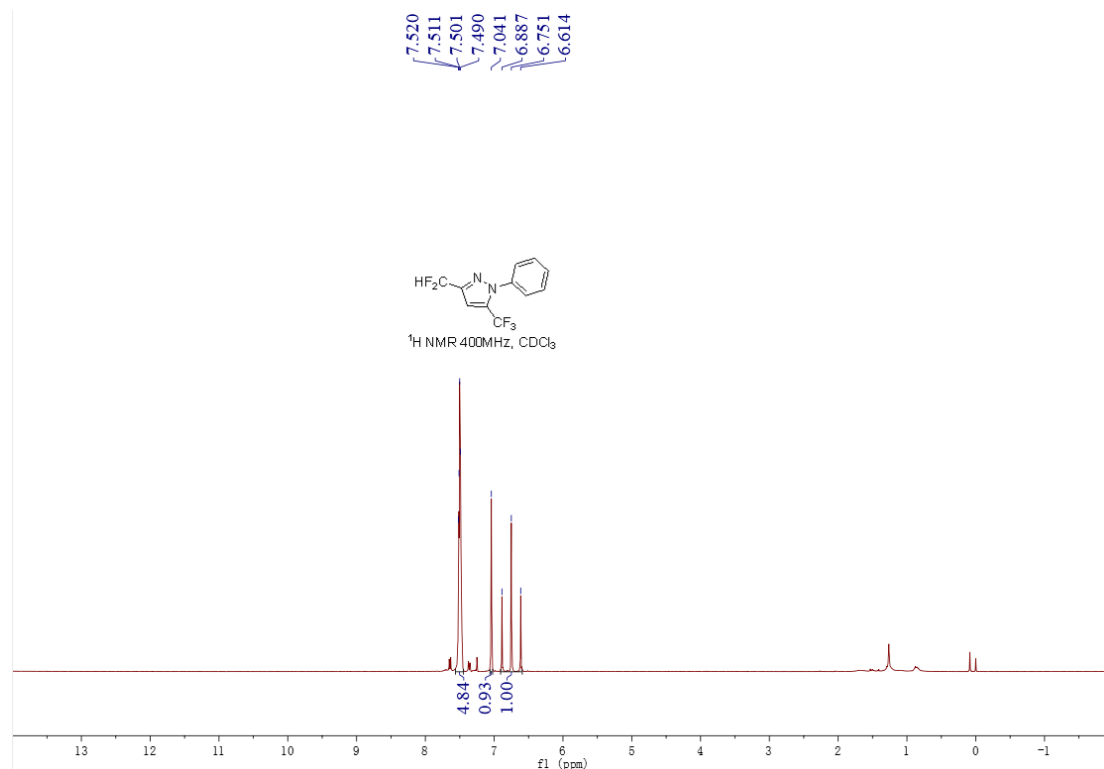

$^{13}\text{C}$  NMR copy of compound **3a**

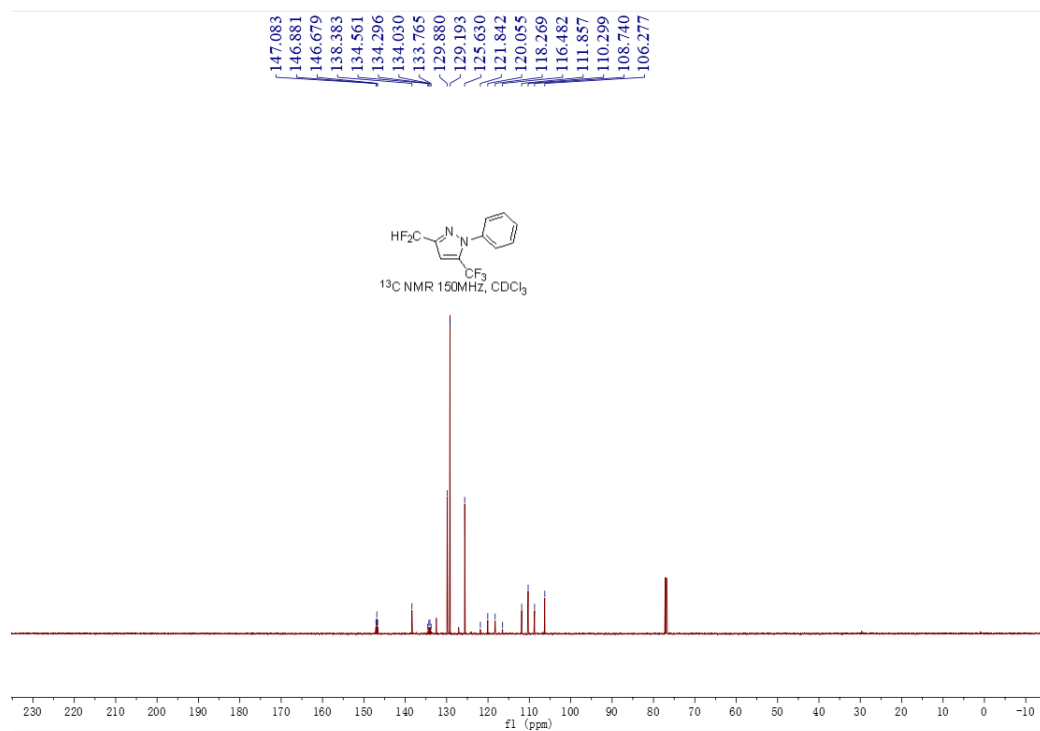

<sup>19</sup>F NMR copy of compound **3a**

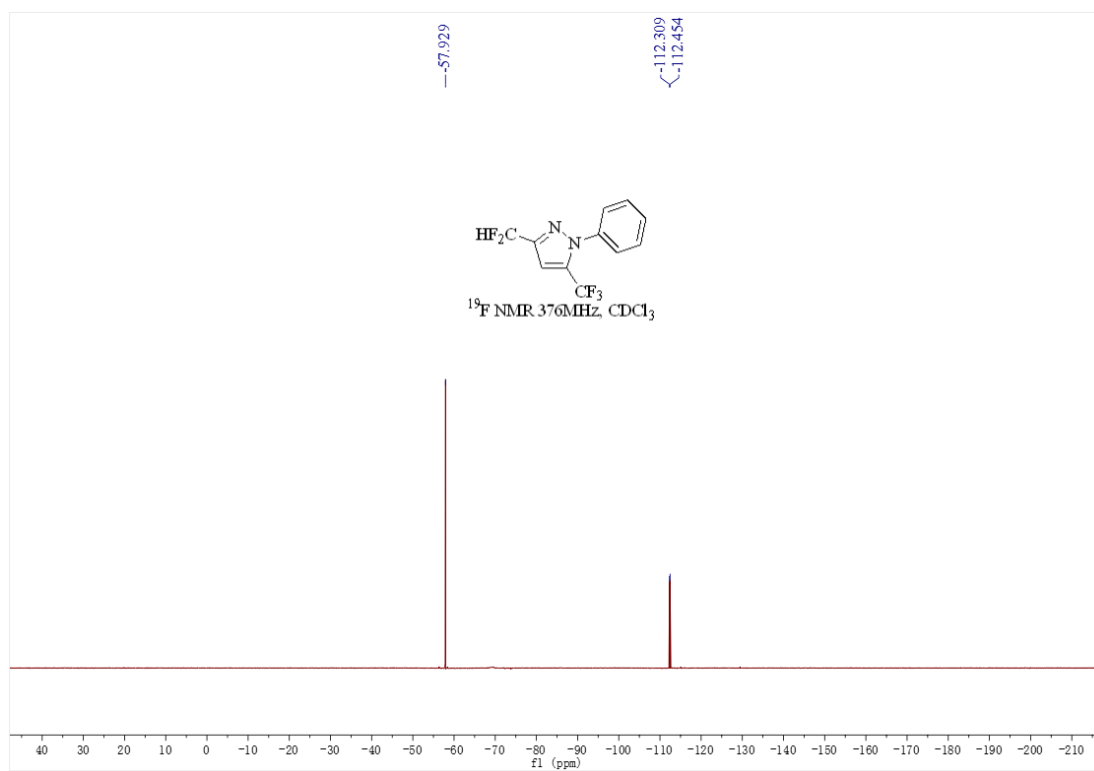

# HRMS copy of compound 3a

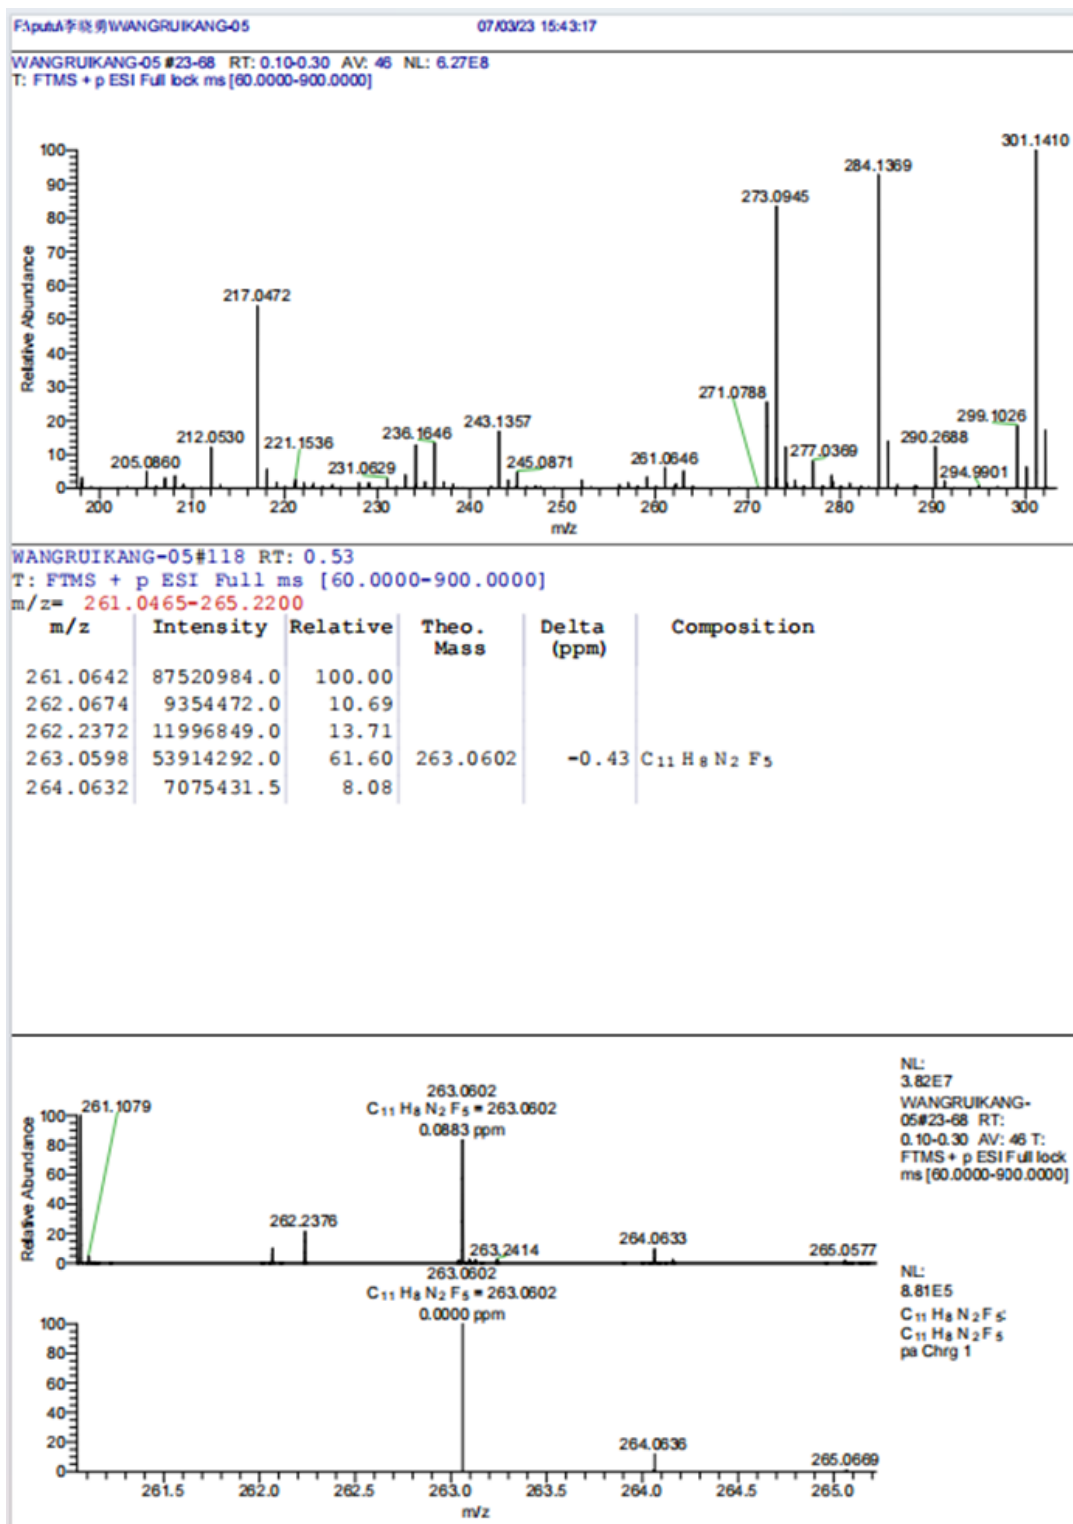

### Spectrogram copies of compound **3b**

#### <sup>1</sup>H NMR copy of compound **3b**

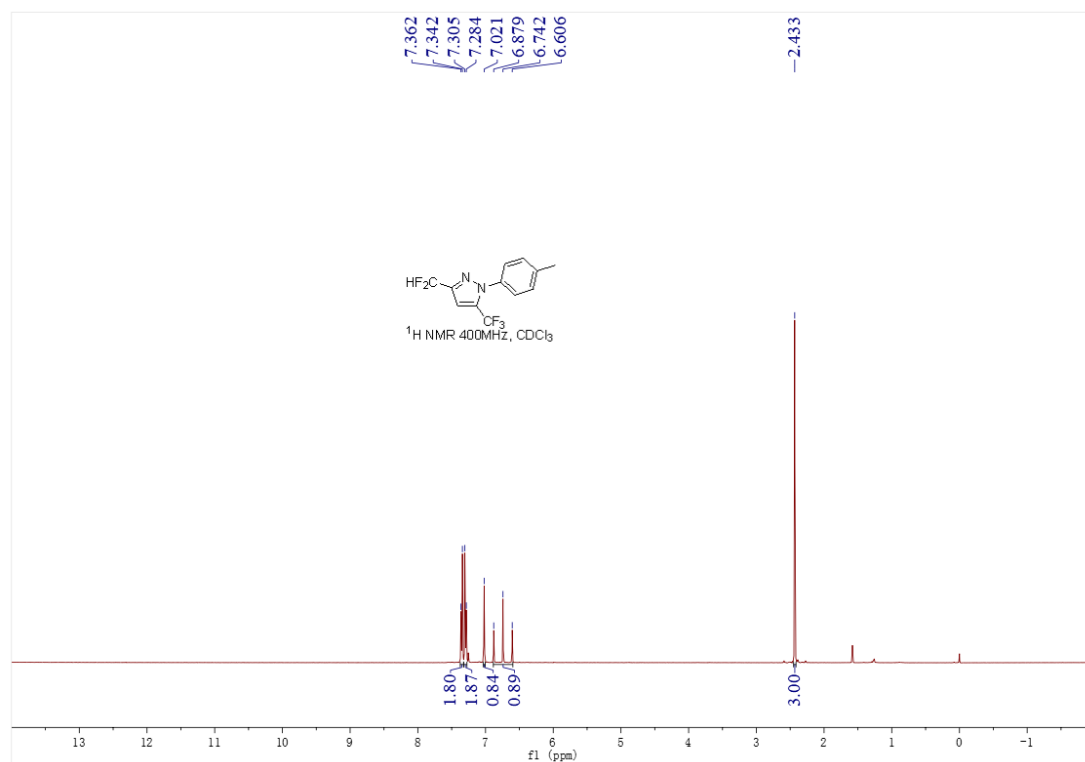

#### <sup>13</sup>C NMR copy of compound **3b**

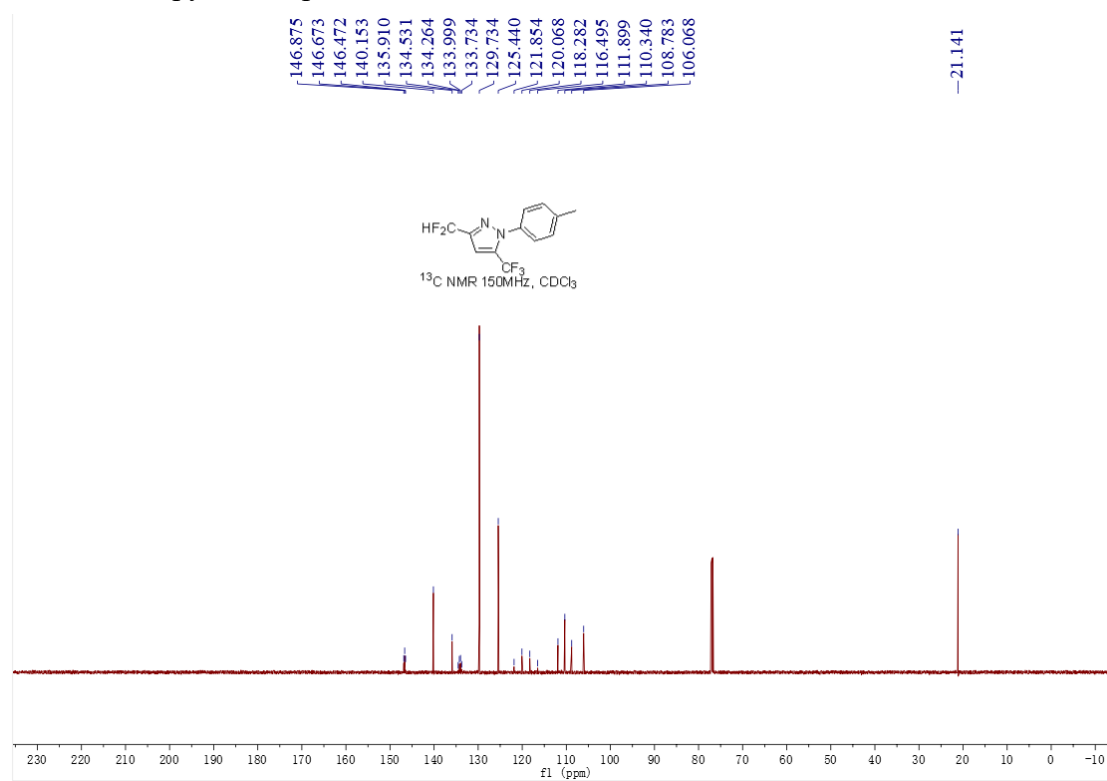

<sup>19</sup>F NMR copy of compound **3b**

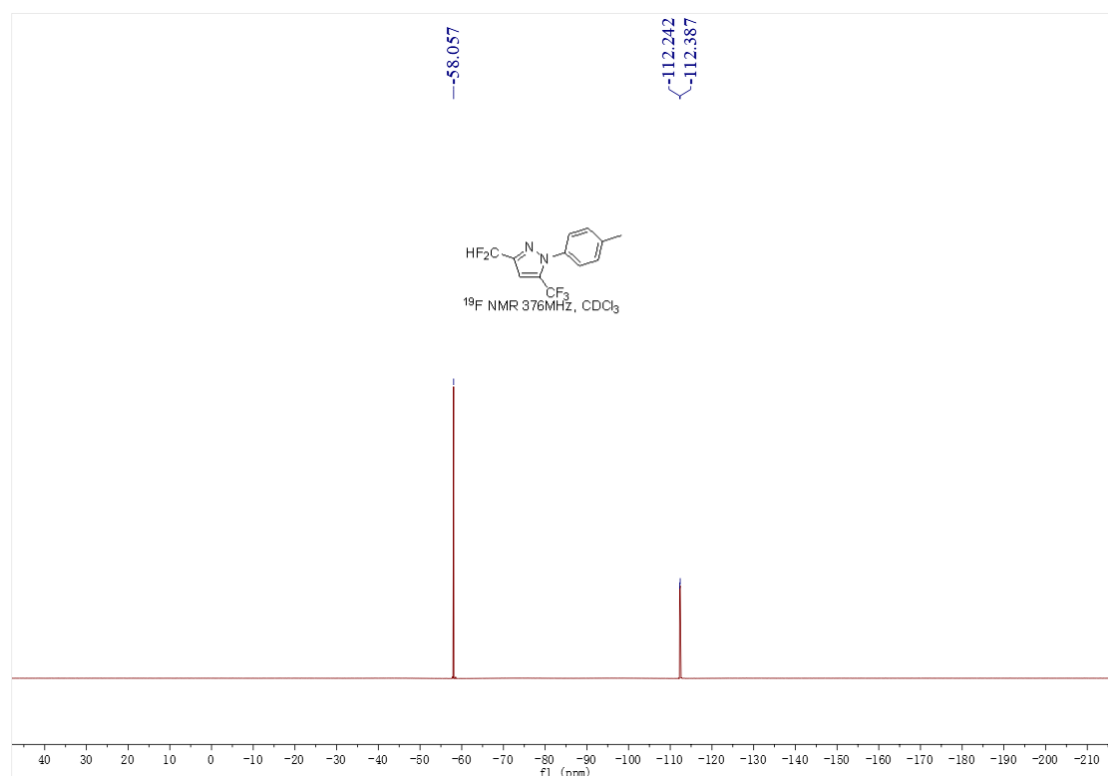

HRMS copy of compound **3b**

Mass Spectrum SmartFormula Report

Analysis Info

Analysis Name D:\Data\user\NWNW-wangruikang 20240205-1.d  
 Method tune\_low.m  
 Sample Name 1  
 Comment

Acquisition Date 2024-2-5 9:21:11  
 Operator Huyue  
 Instrument / Ser# micrOTOF-Q 20453

Acquisition Parameter

|             |          |                       |           |                  |           |
|-------------|----------|-----------------------|-----------|------------------|-----------|
| Source Type | ESI      | Ion Polarity          | Positive  | Set Nebulizer    | 0.4 Bar   |
| Focus       | Active   | Set Capillary         | 4500 V    | Set Dry Heater   | 180 j̄aC  |
| Scan Begin  | 100 m/z  | Set End Plate Offset  | -500 V    | Set Dry Gas      | 4.0 l/min |
| Scan End    | 1000 m/z | Set Collision Cell RF | 300.0 Vpp | Set Divert Valve | Waste     |

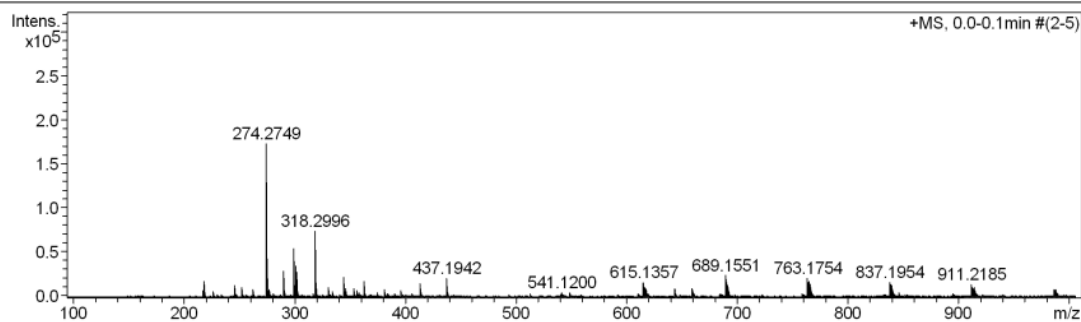

| Meas. m/z | # | Formula             | m/z      | err [ppm] | Me an err [ppm] | rdb | N- Ru le | e j % Conf | mS igma | Std l | Std Me an m/z | Std l Var | Std l m/z Diff | Std Com b Dev |
|-----------|---|---------------------|----------|-----------|-----------------|-----|----------|------------|---------|-------|---------------|-----------|----------------|---------------|
| 299.0572  | 1 | C 12 H 9 F 5 N 2 Na | 299.0578 | 2.1       | 1.9             | 6.5 | ok       | even       | 5.4     | 8.6   | 0.6           | 6.4       | 0.7            | 842.7         |

Spectrogram copies of compound **3d**

$^1\text{H}$  NMR copy of compound **3d**

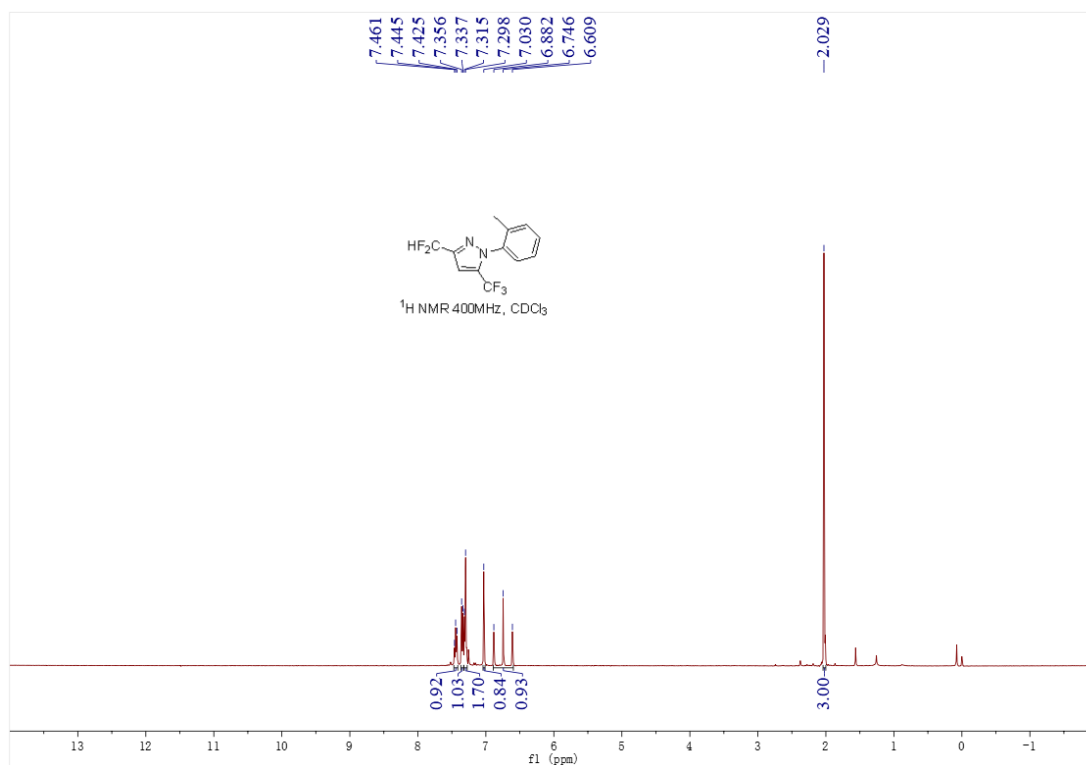

$^{13}\text{C}$  NMR copy of compound **3d**

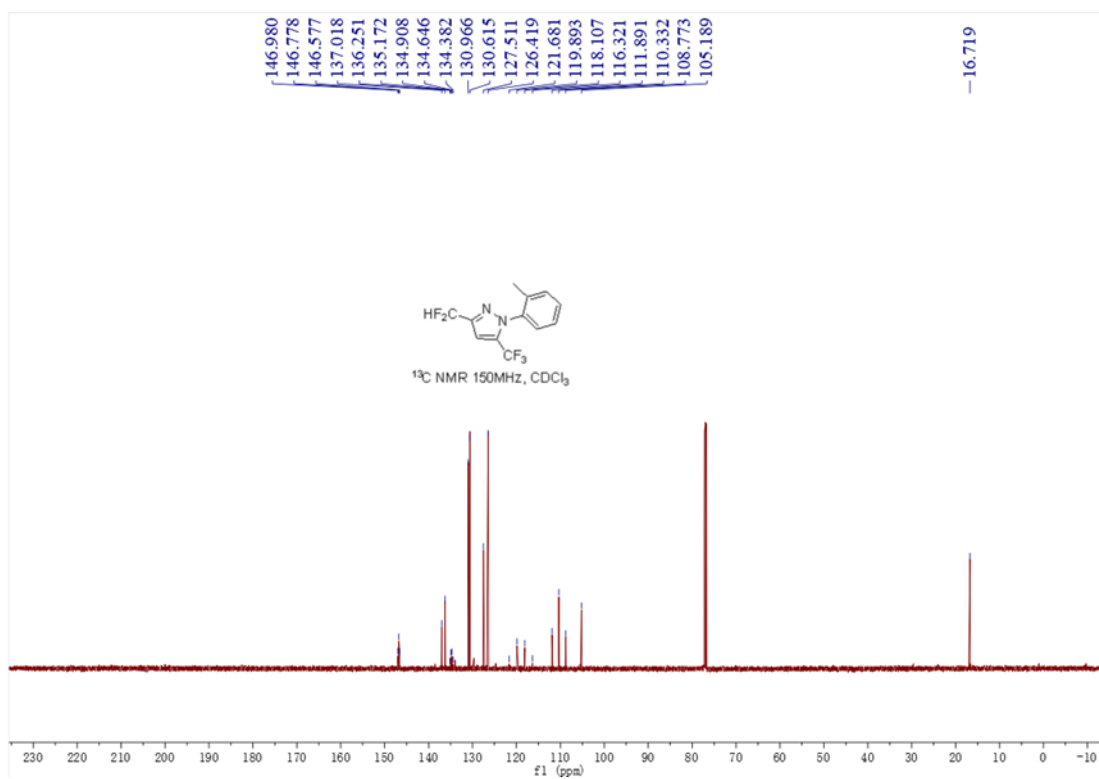



<sup>19</sup>F NMR copy of compound **3d**

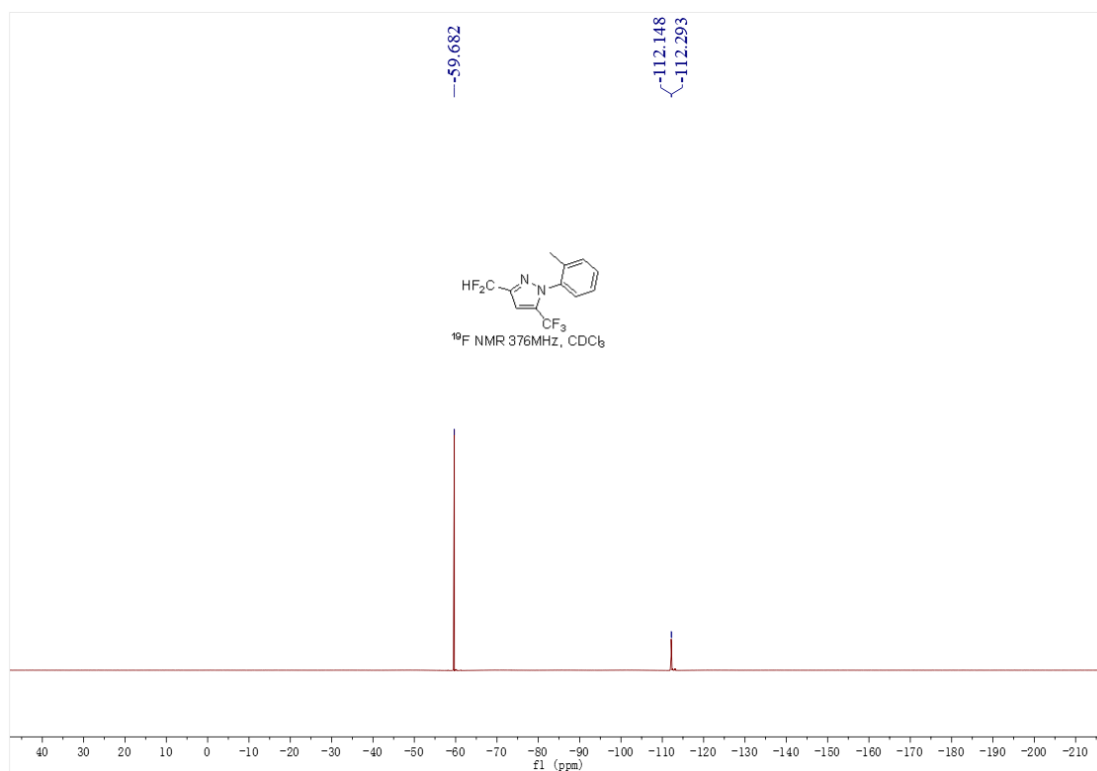

# HRMS copy of compound 3d

WANGRUIKANG-3#19-62 RT: 0.08-0.28 AV: 44 NL: 6.89E8  
T: FTMS + p ESI Full lock ms [60.0000-900.0000]

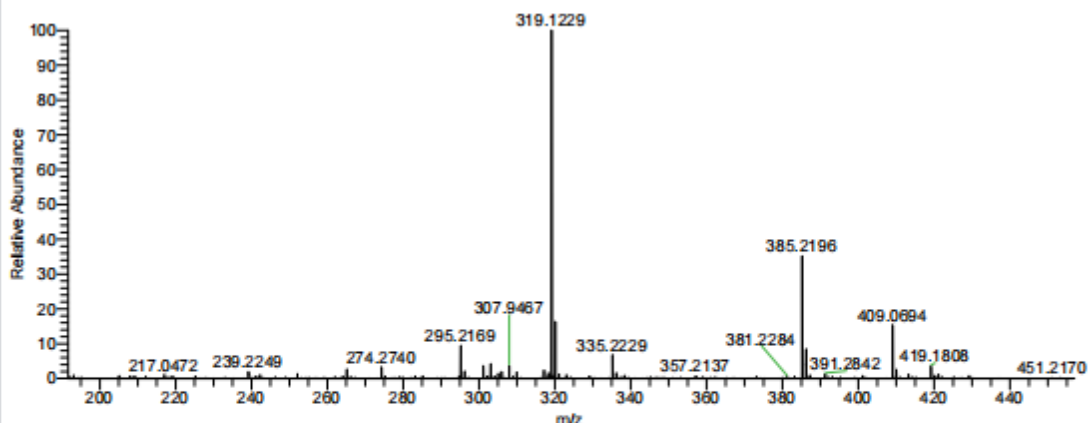

WANGRUIKANG-3#19-62 RT: 0.08-0.28 AV: 44  
T: FTMS + p ESI Full lock ms [60.0000-900.0000]  
m/z = 276.8293-277.2937

| m/z      | Intensity | Relative | Theo. Mass | Delta (ppm) | Composition                                                   |
|----------|-----------|----------|------------|-------------|---------------------------------------------------------------|
| 276.9464 | 16408.6   | 1.46     | 277.0759   | -129.43     | C <sub>12</sub> H <sub>10</sub> N <sub>2</sub> F <sub>5</sub> |
| 277.0761 | 315604.8  | 28.03    | 277.0759   | 0.25        | C <sub>12</sub> H <sub>10</sub> N <sub>2</sub> F <sub>5</sub> |
| 277.1144 | 77138.0   | 6.85     | 277.0759   | 38.58       | C <sub>12</sub> H <sub>10</sub> N <sub>2</sub> F <sub>5</sub> |
| 277.1222 | 1125918.4 | 100.00   | 277.0759   | 46.33       | C <sub>12</sub> H <sub>10</sub> N <sub>2</sub> F <sub>5</sub> |
| 277.1786 | 72878.6   | 6.47     | 277.0759   | 102.68      | C <sub>12</sub> H <sub>10</sub> N <sub>2</sub> F <sub>5</sub> |

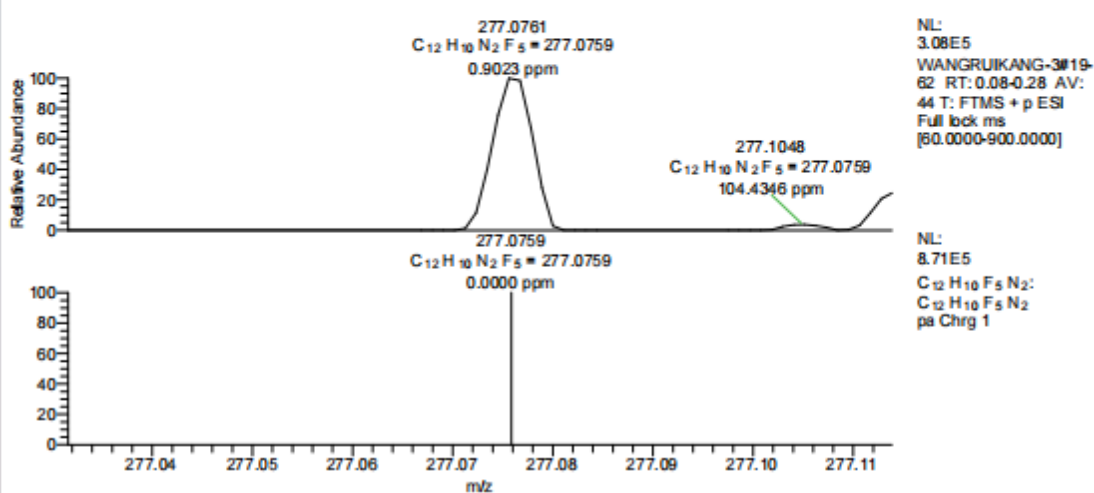

### Spectrogram copies of compound **3e**

#### $^1\text{H}$ NMR copy of compound **3e**

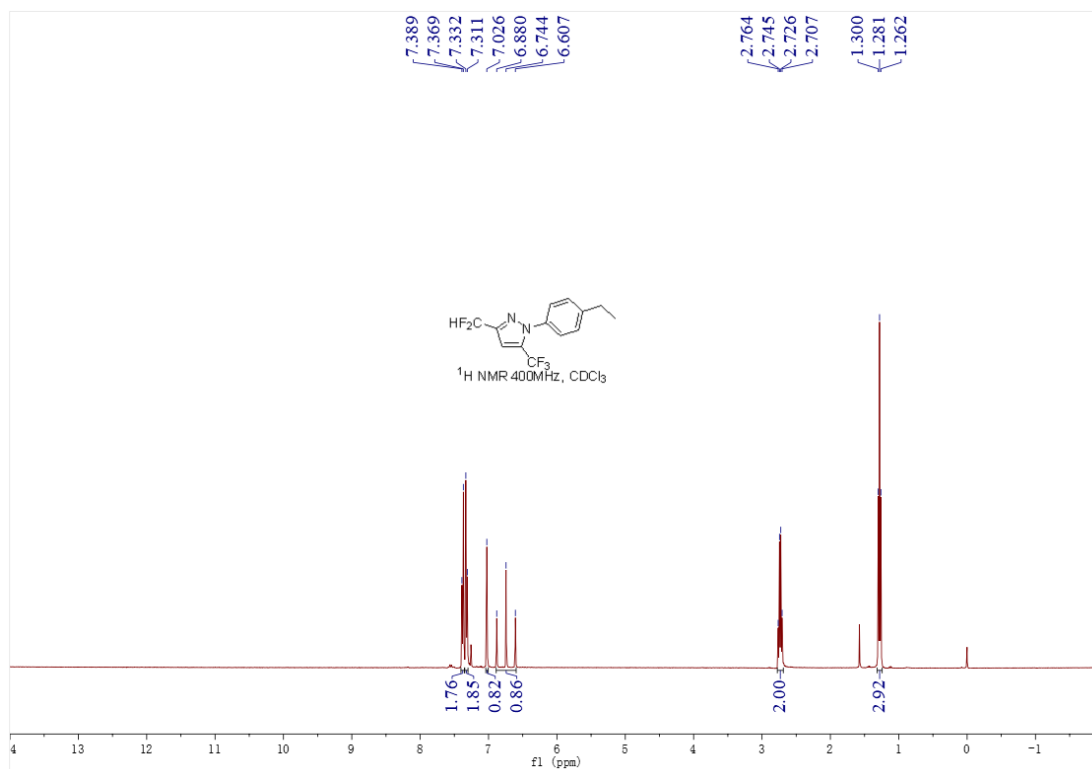

#### $^{13}\text{C}$ NMR copy of compound **3e**

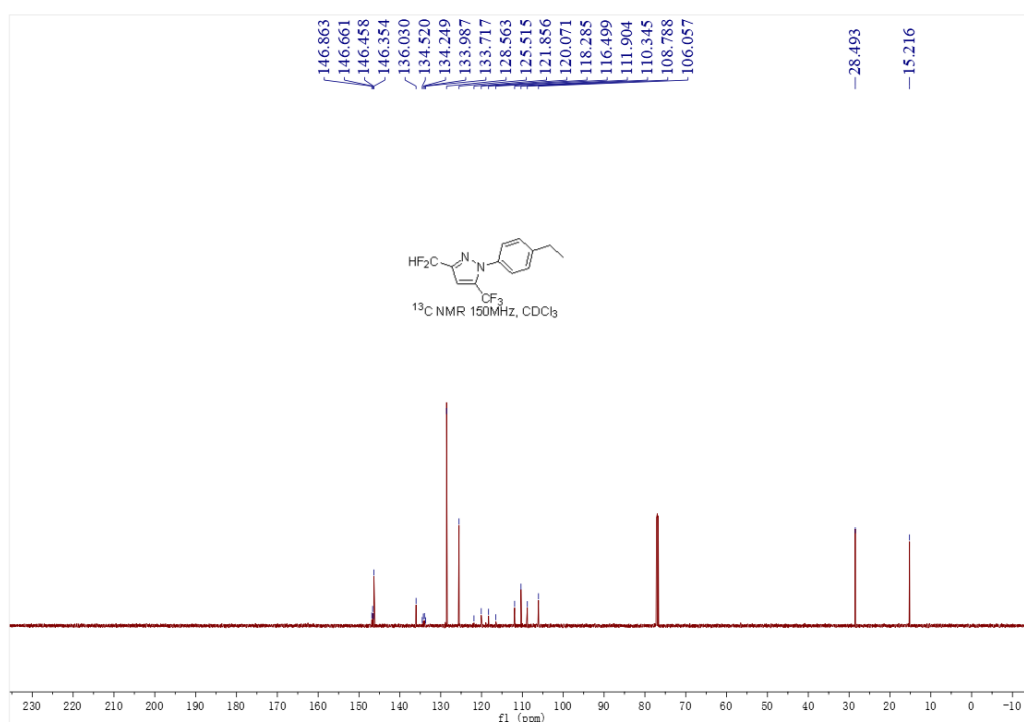

<sup>19</sup>F NMR copy of compound **3e**

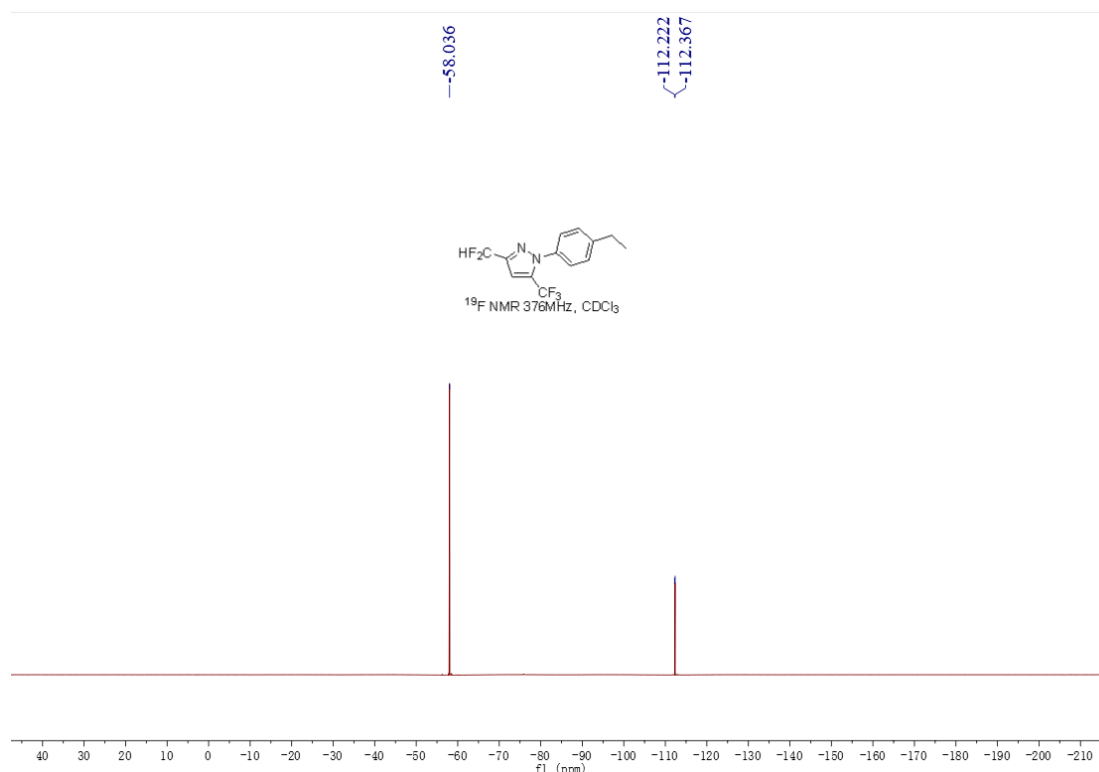

HRMS copy of compound **3e**

Mass Spectrum SmartFormula Report

|                                                            |                                    |
|------------------------------------------------------------|------------------------------------|
| <b>Analysis Info</b>                                       | Acquisition Date 2024-2-5 9:56:34  |
| Analysis Name D:\Data\user\NWNWU-wangruikang 20240205-10.d | Operator Huyue                     |
| Method tune_low.m                                          | Instrument / Ser# micrOTOF-Q 20453 |
| Sample Name 10                                             |                                    |
| Comment                                                    |                                    |

Acquisition Parameter

|                    |                                 |                        |
|--------------------|---------------------------------|------------------------|
| Source Type ESI    | Ion Polarity Positive           | Set Nebulizer 0.4 Bar  |
| Focus Active       | Set Capillary 4500 V            | Set Dry Heater 180 j°C |
| Scan Begin 100 m/z | Set End Plate Offset -500 V     | Set Dry Gas 4.0 l/min  |
| Scan End 1000 m/z  | Set Collision Cell RF 300.0 Vpp | Set Divert Valve Waste |

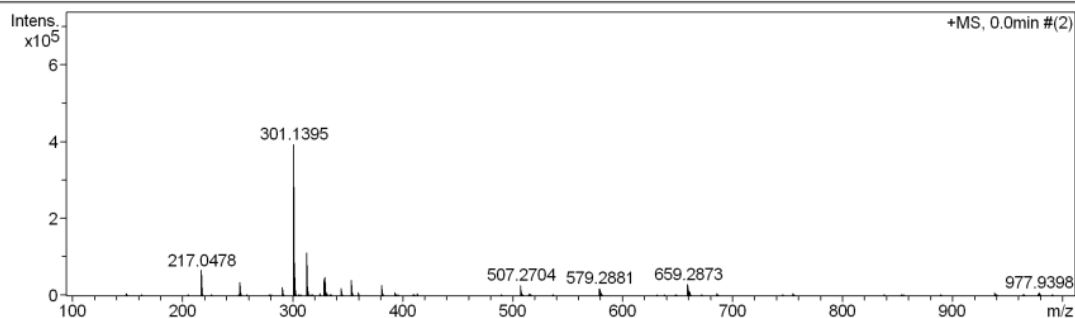

| Meas. m/z | # | Formula              | m/z      | err [ppm] | Me an err [ppm] | rdb | N-Ru le | ej% Conf | mS ig ma | Std l | Std Me an m/z | Std l Var No rm | Std m/ z Diff | Std Com b Dev |
|-----------|---|----------------------|----------|-----------|-----------------|-----|---------|----------|----------|-------|---------------|-----------------|---------------|---------------|
| 313.0734  | 1 | C 13 H 11 F 5 N 2 Na | 313.0735 | 0.1       | 1.6             | 6.5 | ok      | even     | 8.6      | 14.8  | 1.3           | 8.7             | 3.9           | 842.7         |

### Spectrogram copies of compound **3f**

#### $^1\text{H}$ NMR copy of compound **3f**

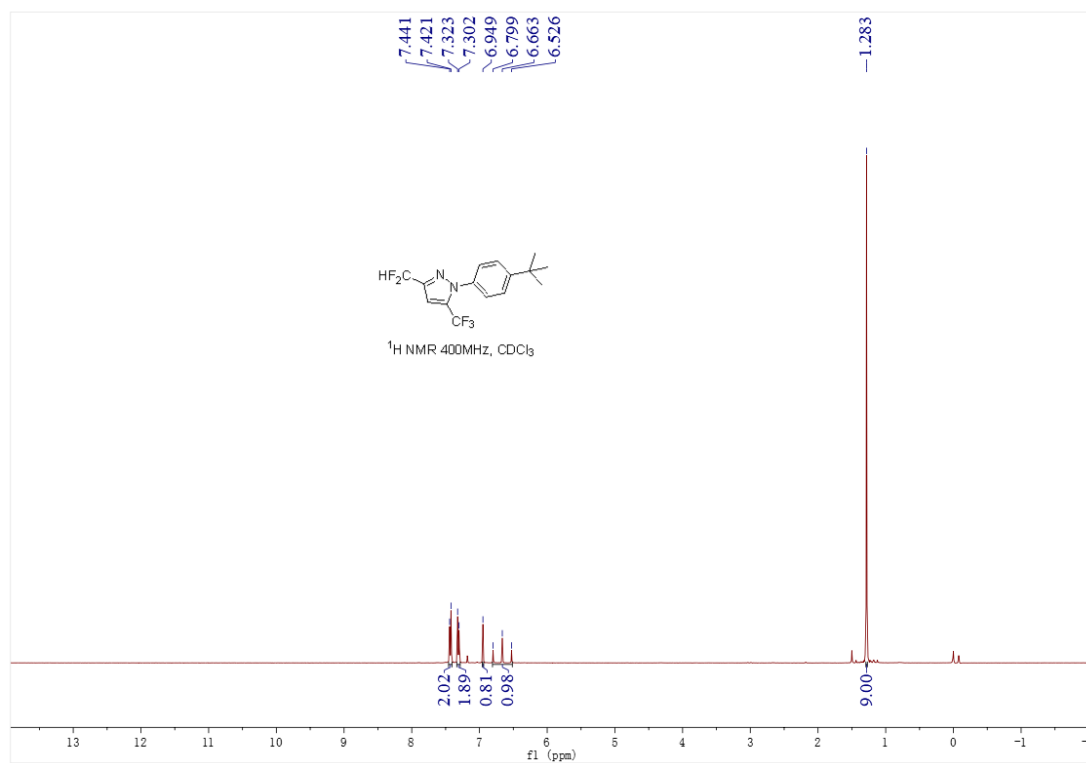

#### $^{13}\text{C}$ NMR copy of compound **3f**

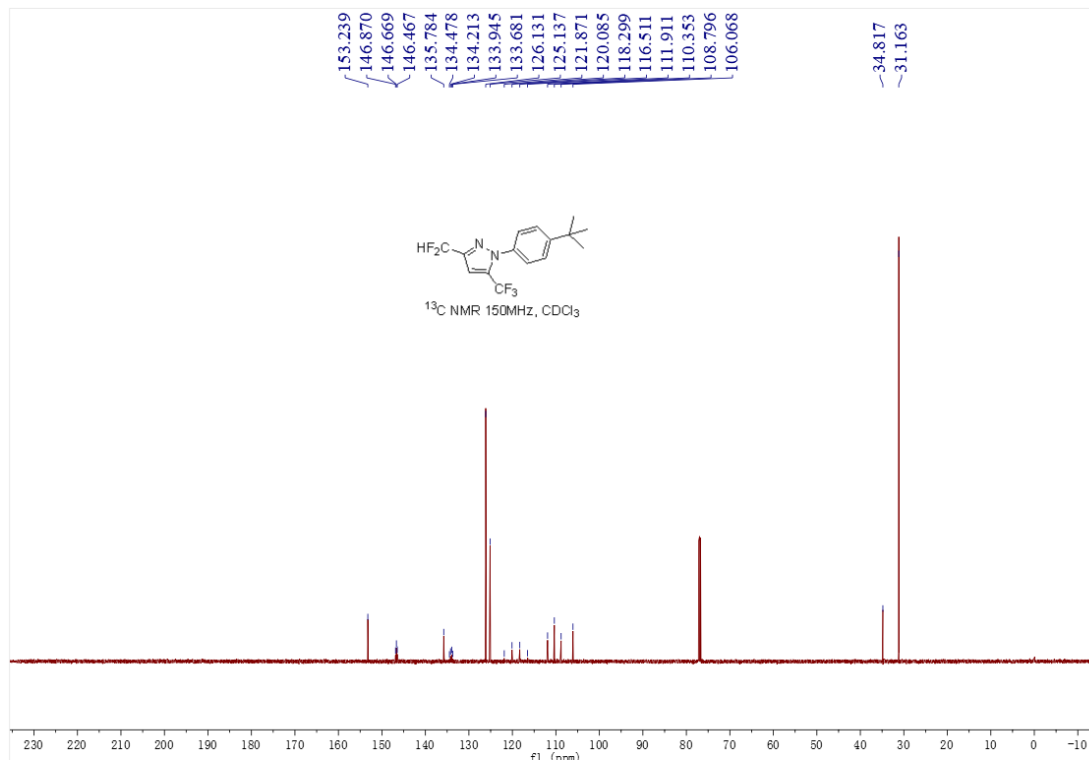

<sup>19</sup>F NMR copy of compound **3f**

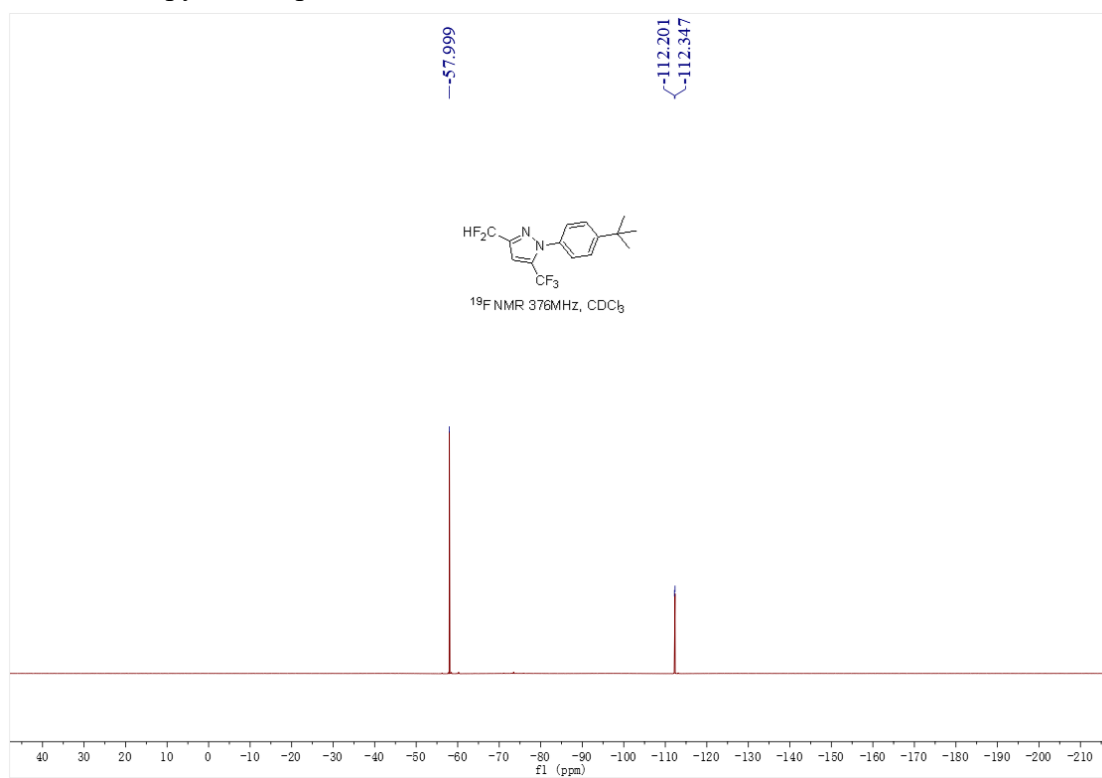

# HRMS copy of compound 3f

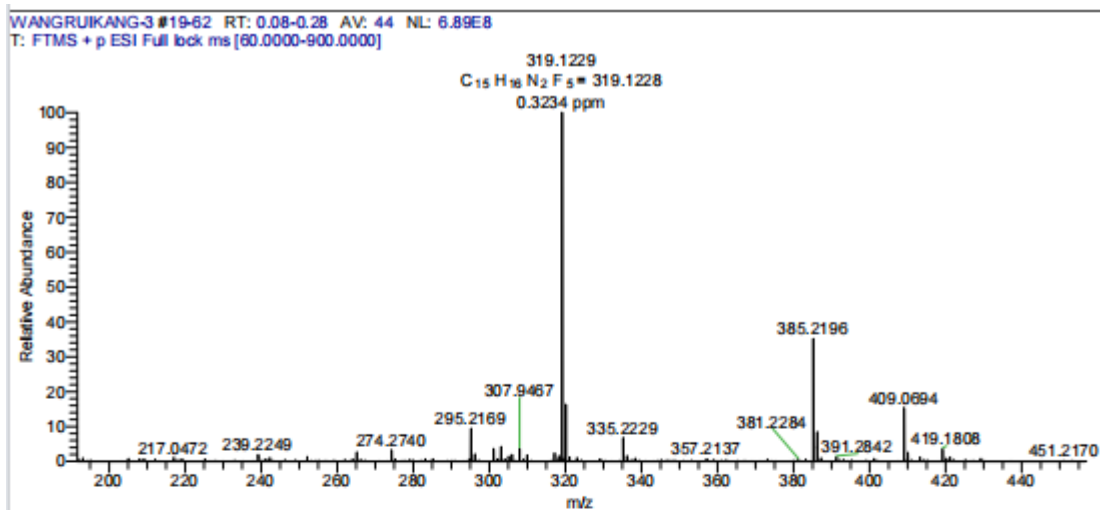

WANGRUIKANG-3#19-62 RT: 0.08-0.28 AV: 44  
T: FTMS + p ESI Full lock ms [60.0000-900.0000]  
m/z= 191.6307-456.6776

| m/z      | Intensity   | Relative | Theo. Mass | Delta (ppm) | Composition                                                   |
|----------|-------------|----------|------------|-------------|---------------------------------------------------------------|
| 295.2169 | 65850368.0  | 9.33     |            |             |                                                               |
| 319.1229 | 705573248.0 | 100.00   | 319.1228   | 0.10        | C <sub>15</sub> H <sub>16</sub> N <sub>2</sub> F <sub>5</sub> |
| 320.1263 | 113023000.0 | 16.02    |            |             |                                                               |
| 385.2196 | 246334480.0 | 34.91    |            |             |                                                               |
| 409.0694 | 107114928.0 | 15.18    |            |             |                                                               |

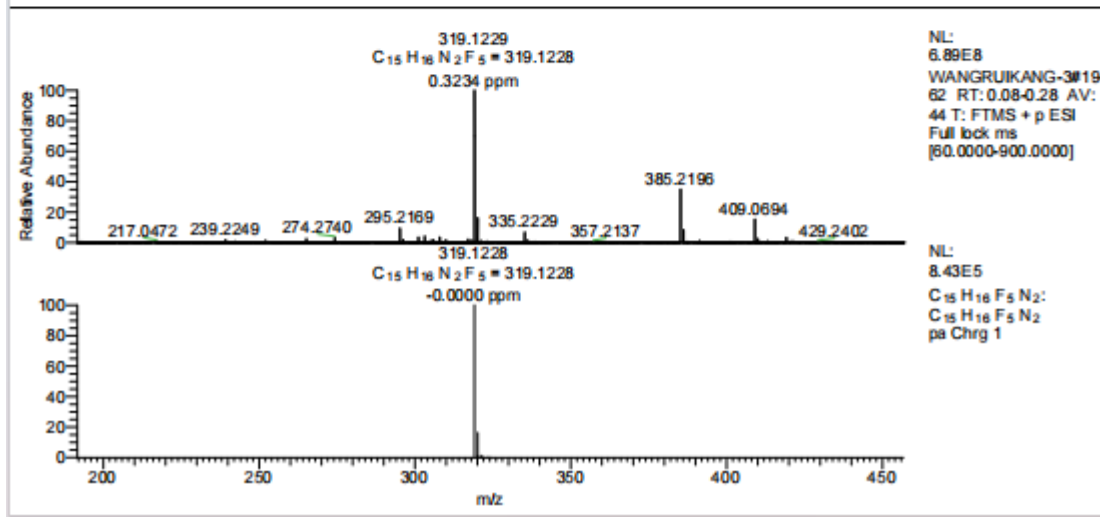

### Spectrogram copies of compound **3g**

#### <sup>1</sup>H NMR copy of compound **3g**

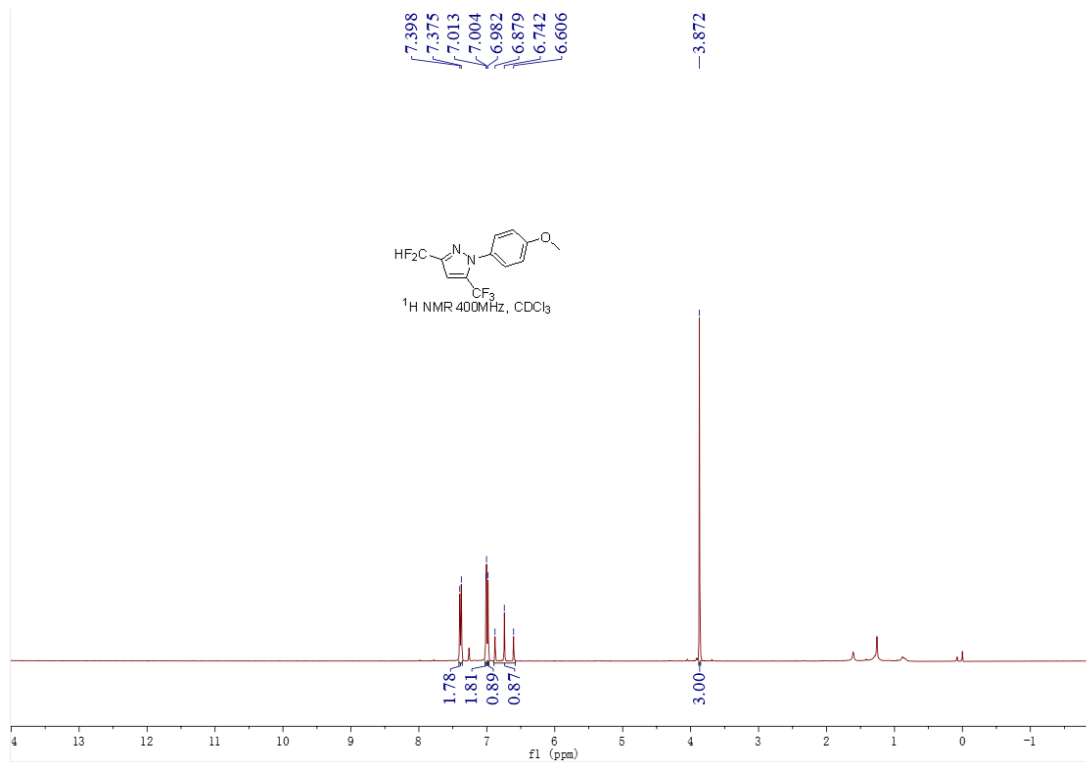

#### <sup>13</sup>C NMR copy of compound **3g**

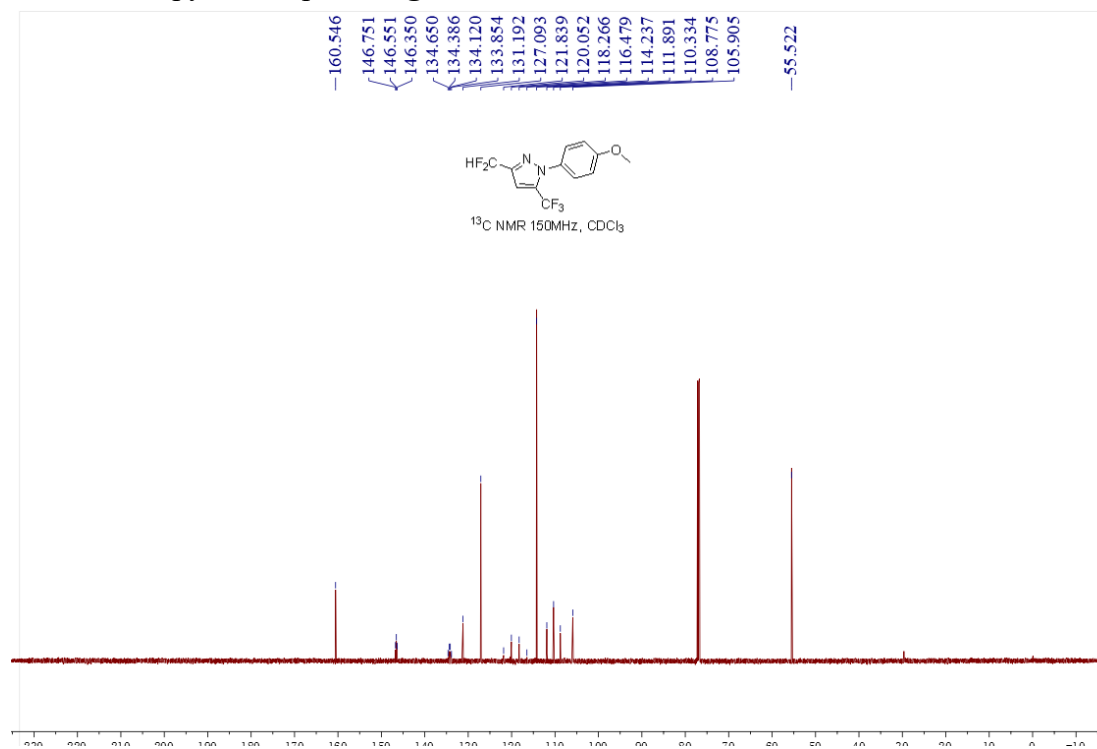



<sup>19</sup>F NMR copy of compound **3g**

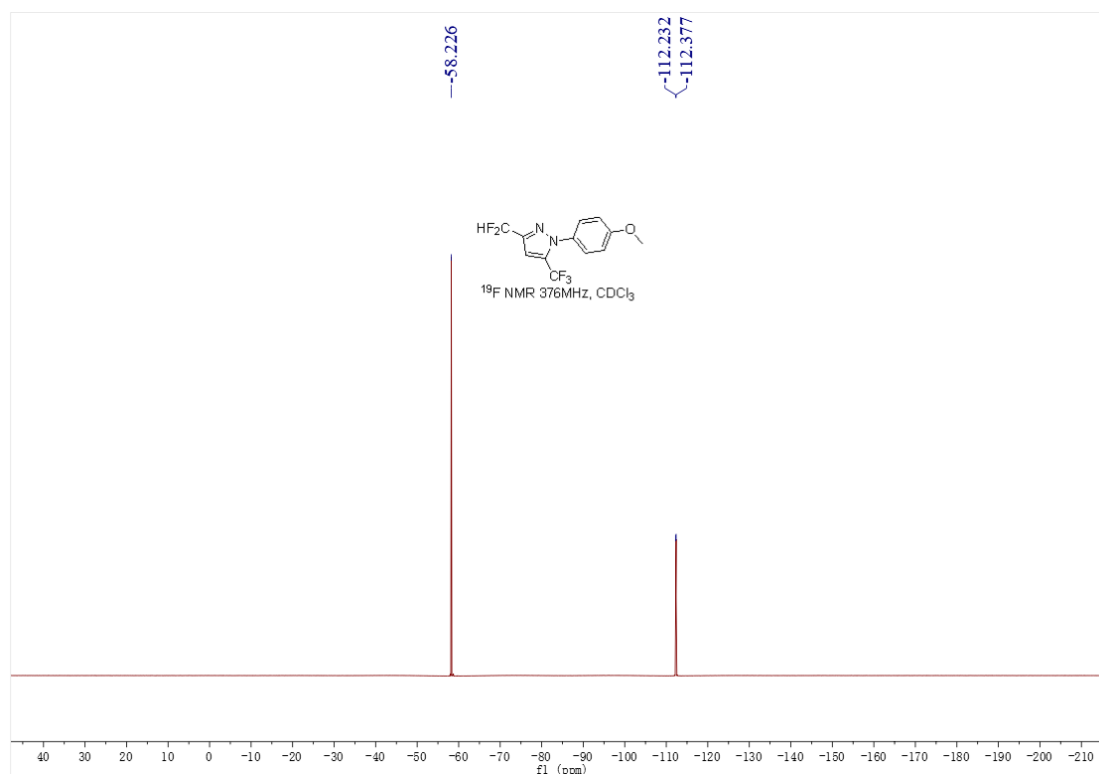

HRMS copy of compound **3g**

Mass Spectrum SmartFormula Report

|                      |                                              |                   |                  |
|----------------------|----------------------------------------------|-------------------|------------------|
| <b>Analysis Info</b> |                                              | Acquisition Date  | 2024-2-5 9:47:22 |
| Analysis Name        | D:\Data\user\NWNWU-wangruikang 20240205--6.d | Operator          | Huyue            |
| Method               | tune_low.m                                   | Instrument / Ser# | micrOTOF-Q 20453 |
| Sample Name          | 6                                            |                   |                  |
| Comment              |                                              |                   |                  |

**Acquisition Parameter**

|             |          |                       |           |                  |           |
|-------------|----------|-----------------------|-----------|------------------|-----------|
| Source Type | ESI      | Ion Polarity          | Positive  | Set Nebulizer    | 0.4 Bar   |
| Focus       | Active   | Set Capillary         | 4500 V    | Set Dry Heater   | 180 j°C   |
| Scan Begin  | 100 m/z  | Set End Plate Offset  | -500 V    | Set Dry Gas      | 4.0 l/min |
| Scan End    | 1000 m/z | Set Collision Cell RF | 300.0 Vpp | Set Divert Valve | Waste     |

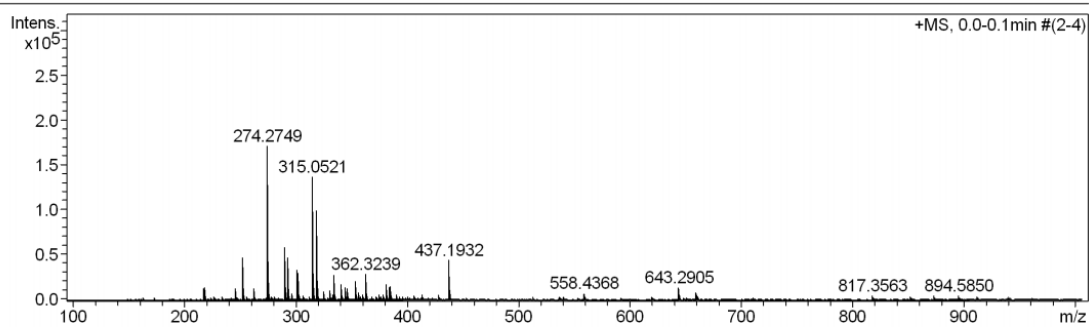

| Meas. #  | Formula                 | m/z      | err [ppm] | Me an err [ppm] | rdb | N-Ru | ej¥ Conf | mS ig ma | Std I | Std Me an z | Std l Var m/ No rm | Std m/ Diff | Std Com b Dev |
|----------|-------------------------|----------|-----------|-----------------|-----|------|----------|----------|-------|-------------|--------------------|-------------|---------------|
| 315.0521 | 1 C 12 H 9 F 5 N 2 Na O | 315.0527 | 2.1       | 2.0             | 6.5 | ok   | even     | 6.7      | 11.5  | 0.6         | 7.1                | 0.3         | 842.7         |

### Spectrogram copies of compound **3h**

#### <sup>1</sup>H NMR copy of compound **3h**

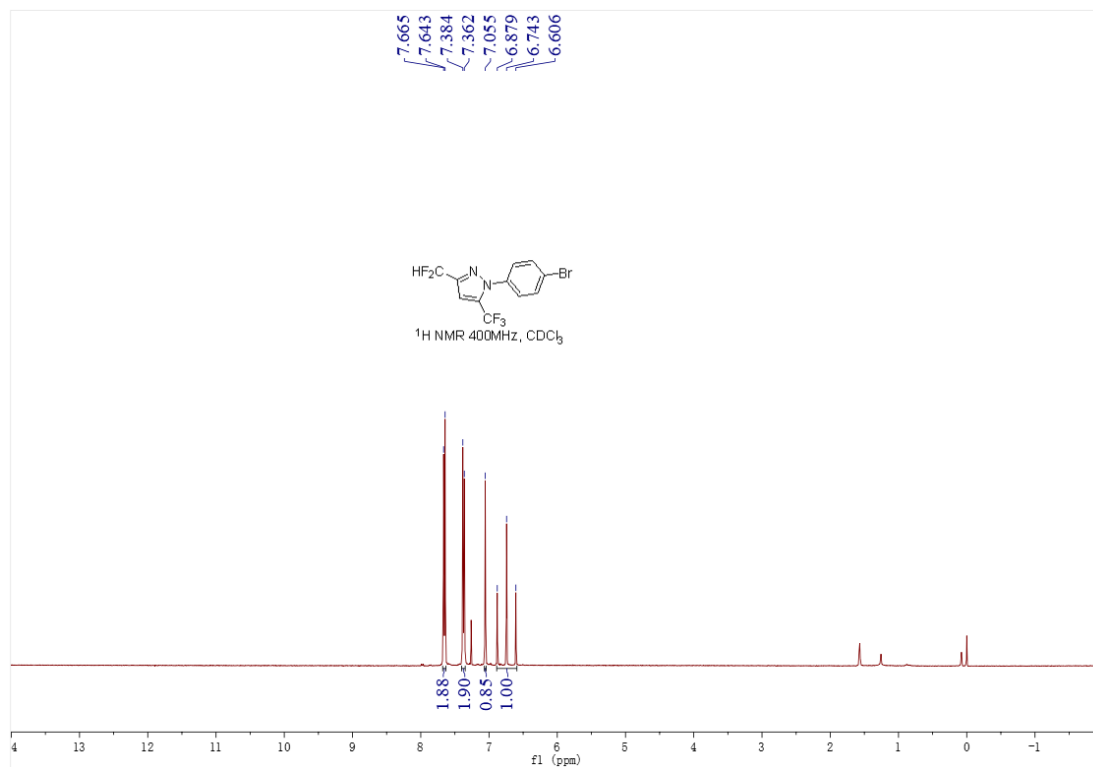

#### <sup>13</sup>C NMR copy of compound **3h**

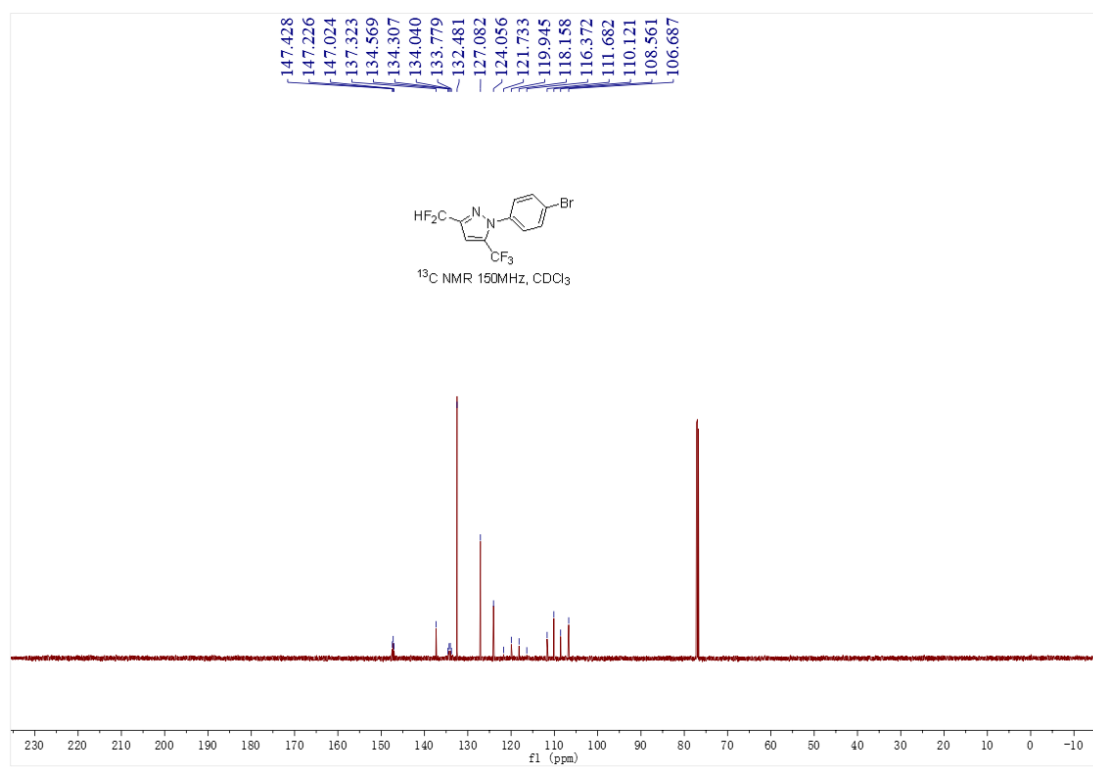

<sup>19</sup>F NMR copy of compound **3h**

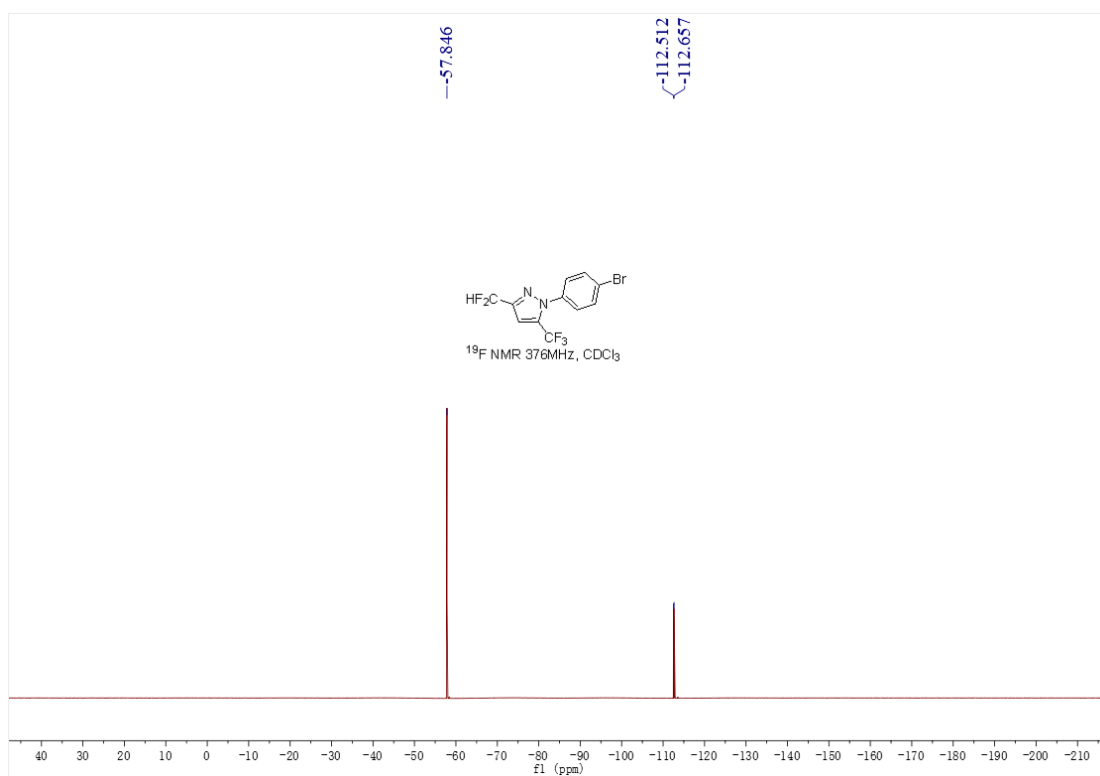

# HRMS copy of compound 3h

WANGRUIKANG-2 #47-90 RT: 0.21-0.40 AV: 44 NL: 1.75E7  
T: FTMS + p ESI Full lock ms [60.0000-900.0000]

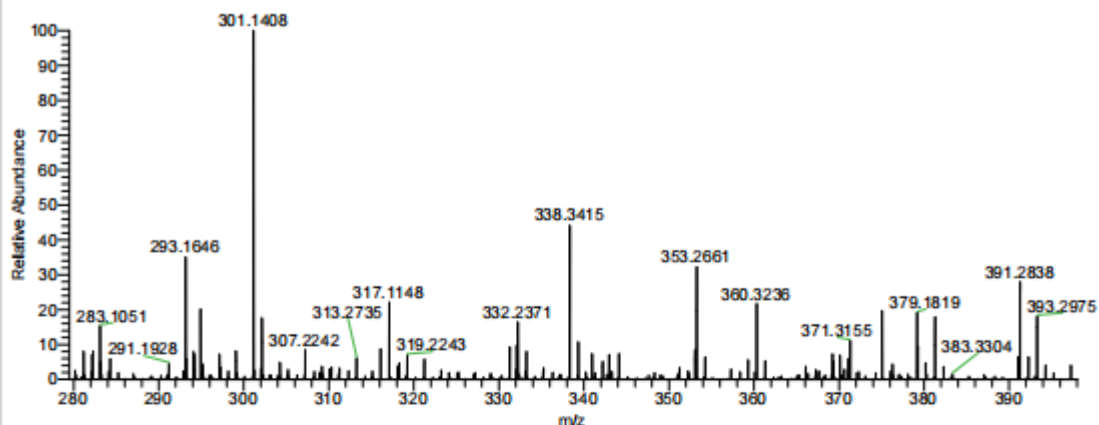

WANGRUIKANG-2 #47-90 RT: 0.21-0.40 AV: 44  
T: FTMS + p ESI Full lock ms [60.0000-900.0000]  
m/z = 339.1364-342.3095

| m/z      | Intensity | Relative | Theo. Mass | Delta (ppm) | Composition                                                    |
|----------|-----------|----------|------------|-------------|----------------------------------------------------------------|
| 339.3450 | 1873589.9 | 100.00   |            |             |                                                                |
| 340.2304 | 350622.9  | 18.71    |            |             |                                                                |
| 340.9706 | 1291521.3 | 68.93    | 340.9707   | -0.11       | C <sub>11</sub> H <sub>7</sub> N <sub>2</sub> BrF <sub>5</sub> |
| 341.3048 | 329300.8  | 17.58    | 340.9707   | 334.10      | C <sub>11</sub> H <sub>7</sub> N <sub>2</sub> BrF <sub>5</sub> |
| 342.2047 | 895541.8  | 47.80    |            |             |                                                                |

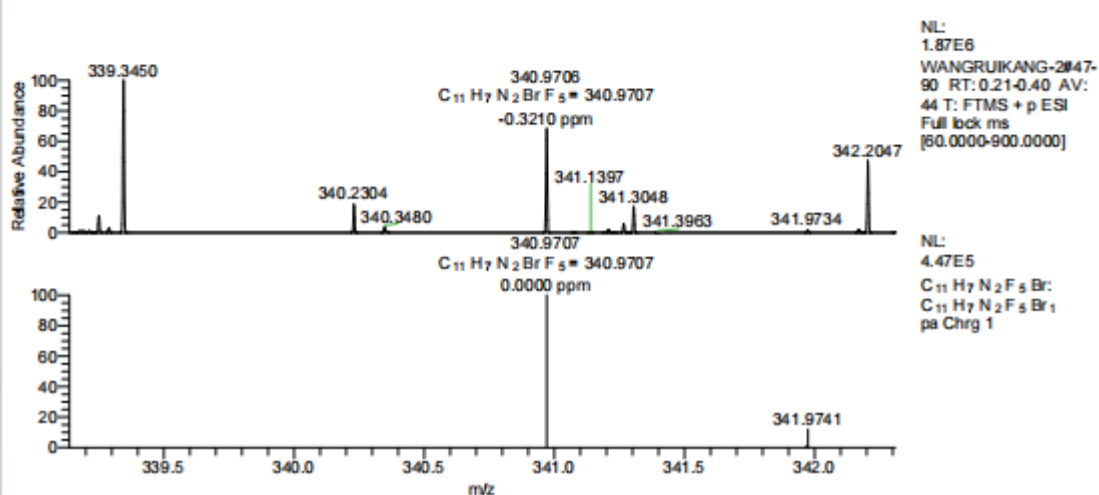

### Spectrogram copies of compound **3i**

#### $^1\text{H}$ NMR copy of compound **3i**

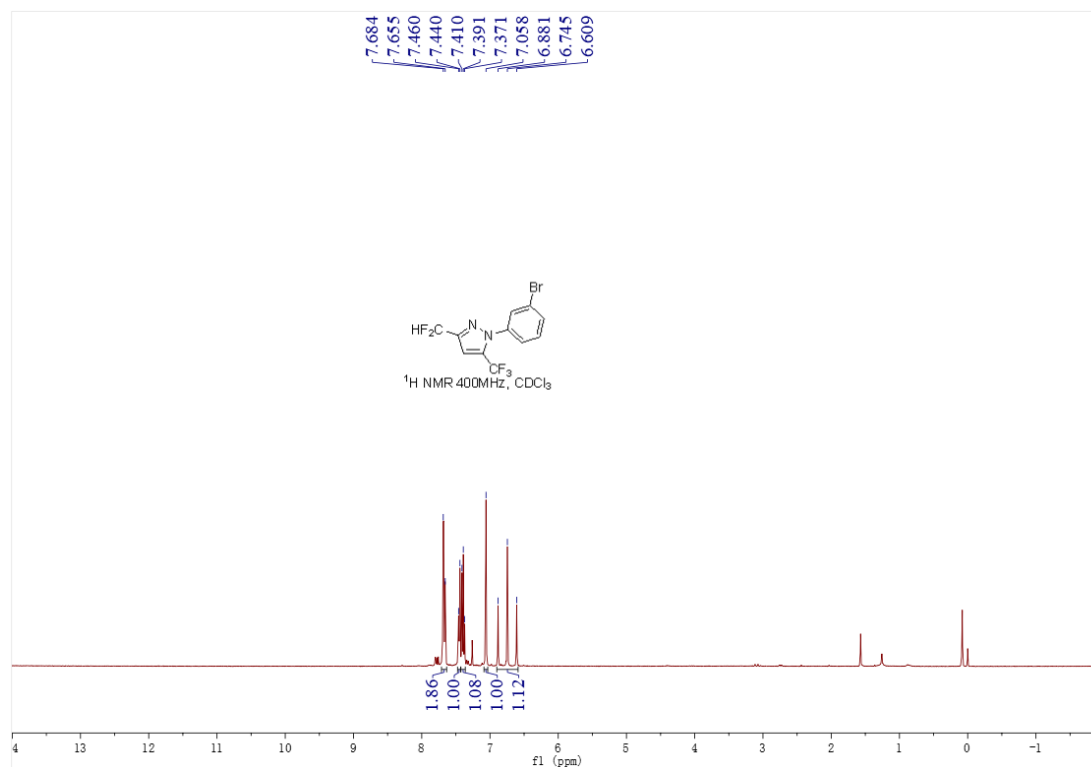

#### $^{13}\text{C}$ NMR copy of compound **3i**

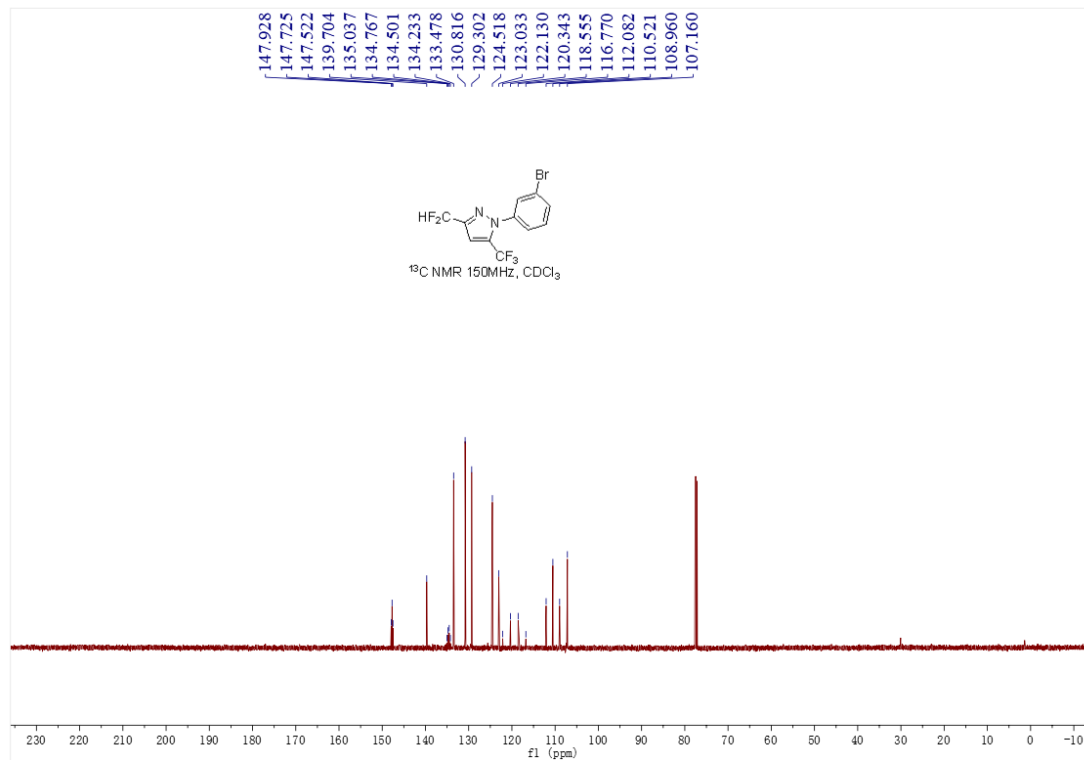

<sup>19</sup>F NMR copy of compound **3i**

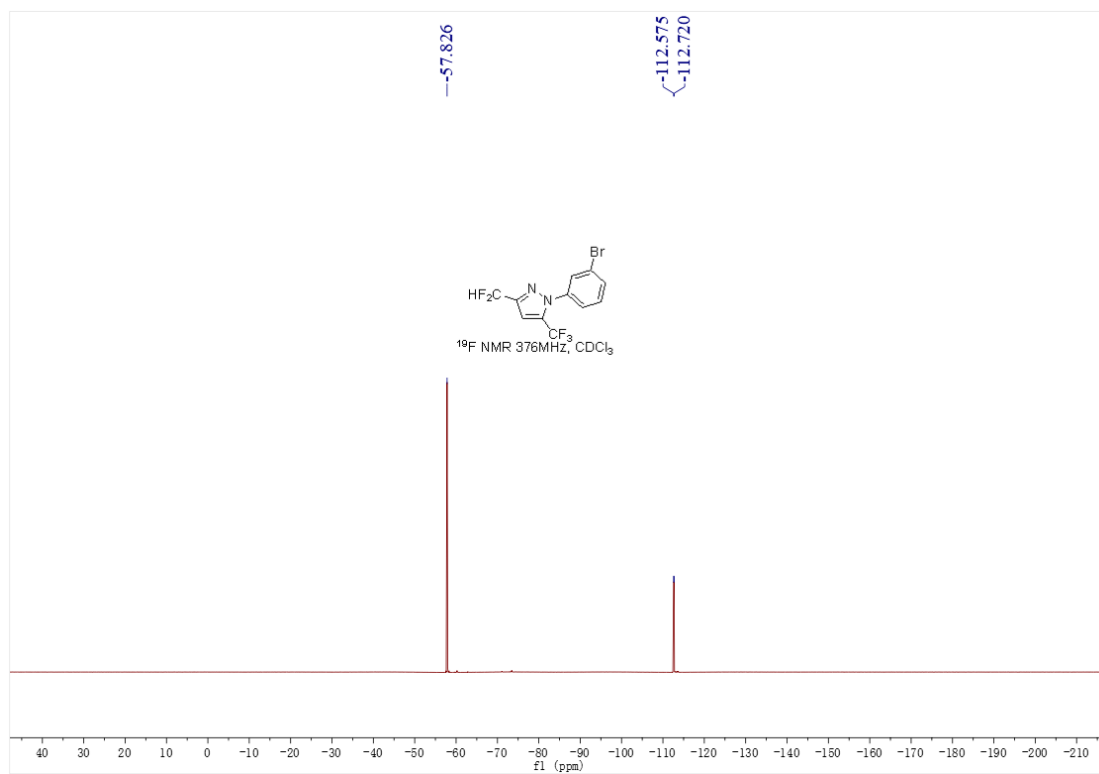

# HRMS copy of compound 3i

WANGRUIKANG-18 #1 RT: 0.00 AV: 1 NL: 2.45E7  
 T: FTMS + p ESI Full lock ms [60.0000-900.0000]

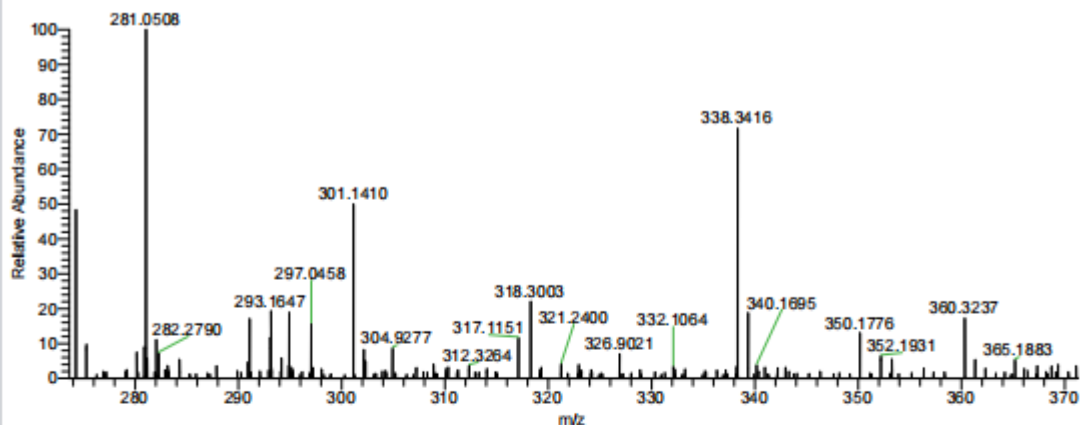

WANGRUIKANG-18 #1 RT: 0.00  
 T: FTMS + p ESI Full lock ms [60.0000-900.0000]  
 m/z = 338.7772-342.0294

| m/z      | Intensity | Relative | Theo. Mass | Delta (ppm) | Composition                                                     |
|----------|-----------|----------|------------|-------------|-----------------------------------------------------------------|
| 339.3453 | 4618260.0 | 100.00   |            |             |                                                                 |
| 340.1695 | 932057.2  | 20.18    |            |             |                                                                 |
| 340.3485 | 516863.9  | 11.19    |            |             |                                                                 |
| 340.3577 | 429236.6  | 9.29     |            |             |                                                                 |
| 340.9709 | 760309.8  | 16.46    | 340.9707   | 0.16        | C <sub>11</sub> H <sub>7</sub> N <sub>2</sub> Br F <sub>5</sub> |

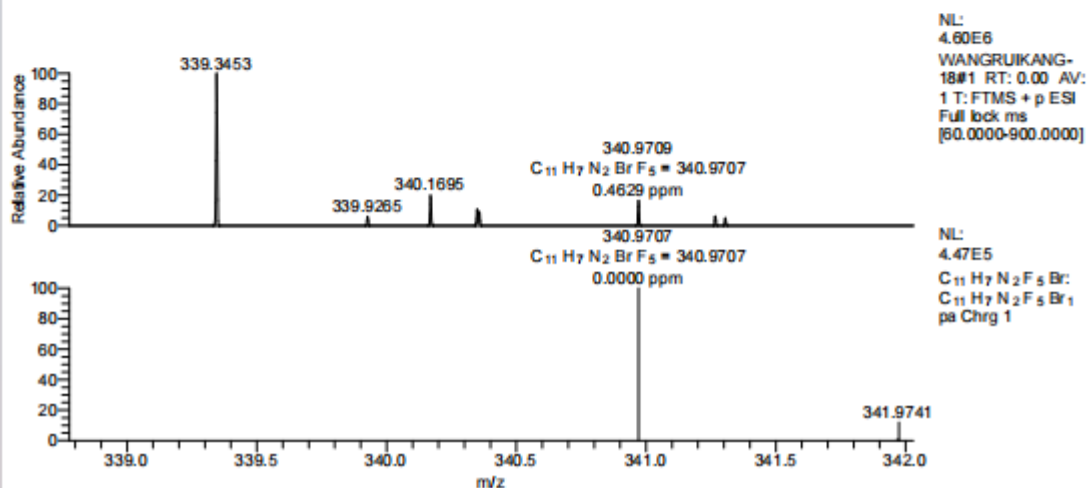

### Spectrogram copies of compound **3j**

#### $^1\text{H}$ NMR copy of compound **3j**

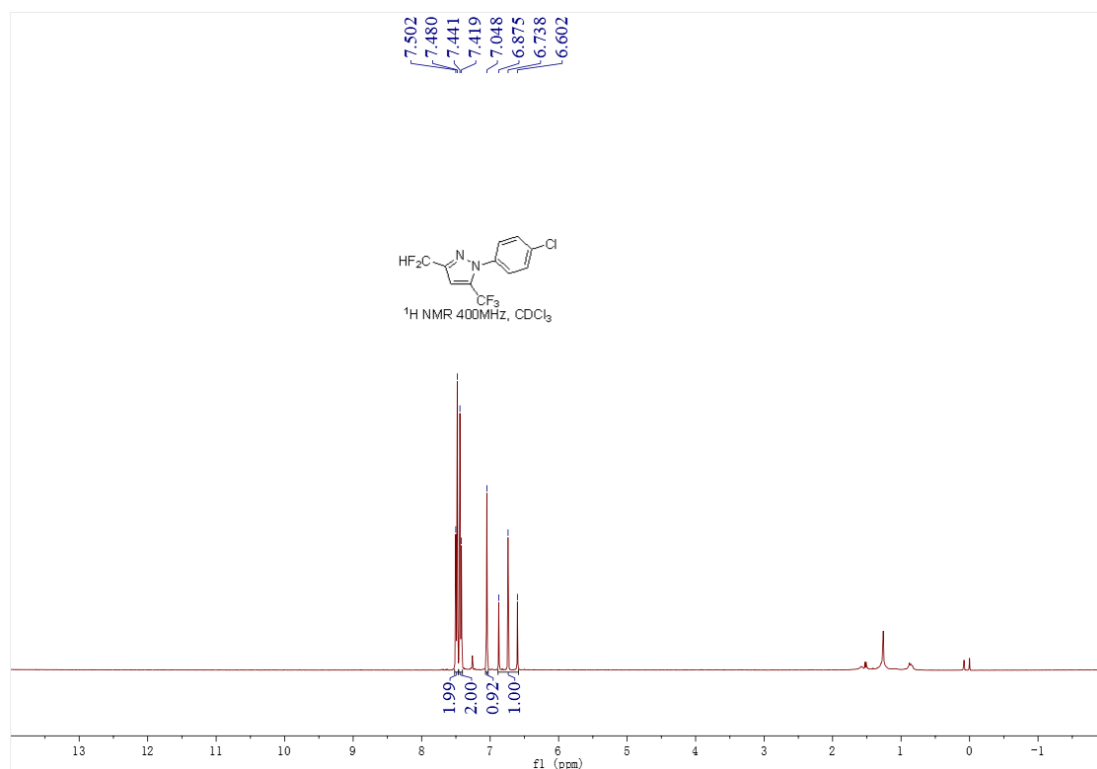

#### $^{13}\text{C}$ NMR copy of compound **3j**

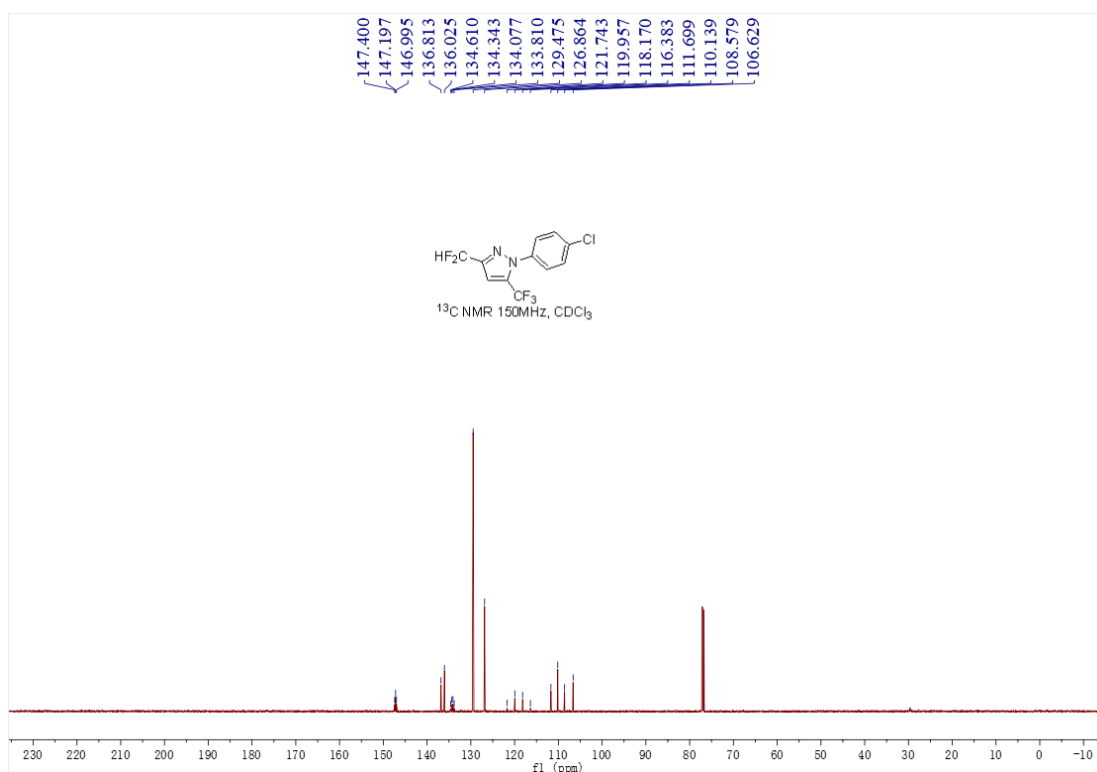



<sup>19</sup>F NMR copy of compound **3j**

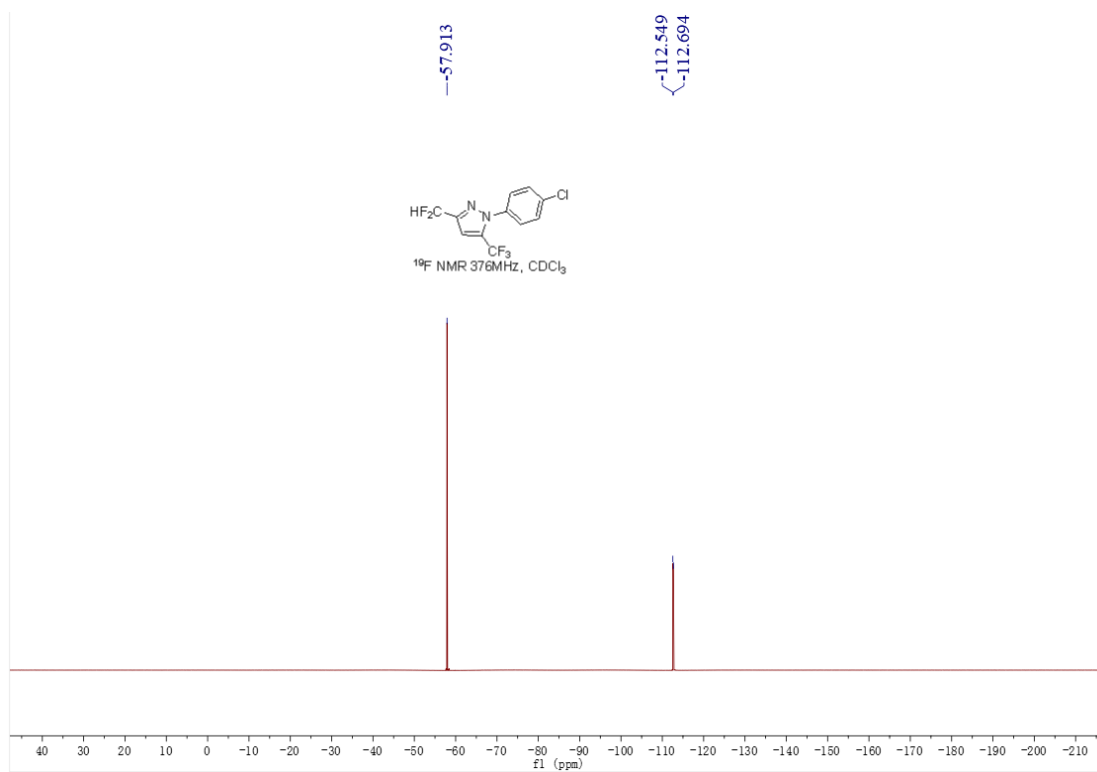

# HRMS copy of compound 3j

ZHAOSHUJUAN-27#23-66 RT: 0.10-0.29 AV: 44 NL: 3.22E7  
 T: FTMS + p ESI Full lock ms [100.0000-750.0000]

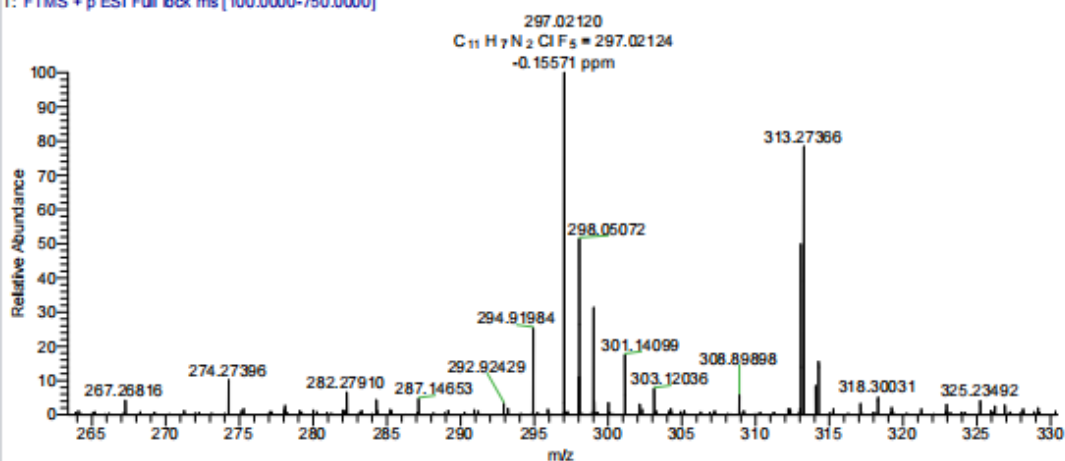

ZHAOSHUJUAN-27#23-66 RT: 0.10-0.29 AV: 44  
 T: FTMS + p ESI Full lock ms [100.0000-750.0000]  
 m/z = 263.36866-330.41312

| m/z       | Intensity  | Relative | Theo. Mass | Delta (ppm) | Composition                                                    |
|-----------|------------|----------|------------|-------------|----------------------------------------------------------------|
| 297.02120 | 32297652.0 | 100.00   | 297.02124  | -0.05       | C <sub>11</sub> H <sub>7</sub> N <sub>2</sub> ClF <sub>5</sub> |
| 298.05072 | 16630892.0 | 51.49    |            |             |                                                                |
| 299.01823 | 10180078.0 | 31.52    |            |             |                                                                |
| 313.07579 | 16446007.0 | 50.92    |            |             |                                                                |
| 313.27366 | 25305180.0 | 78.35    |            |             |                                                                |

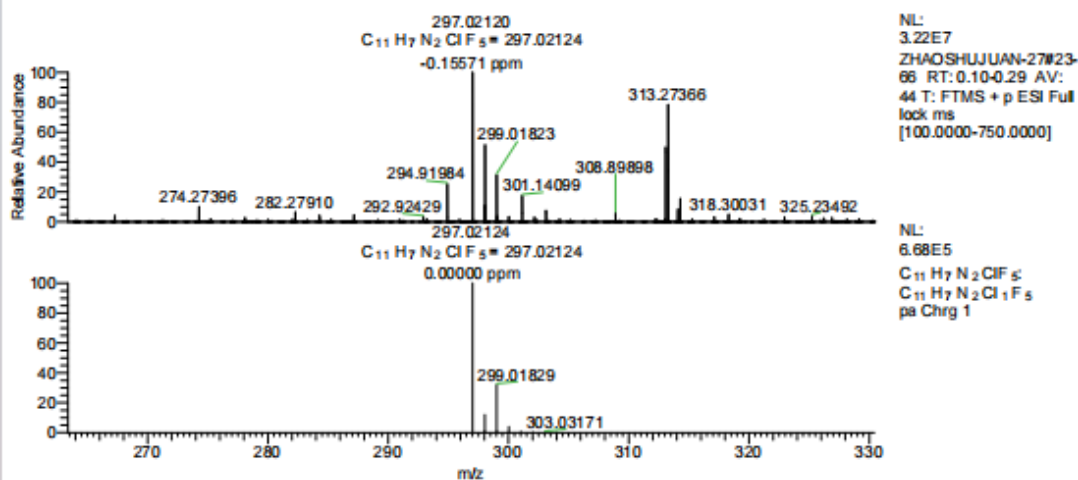

NL: 3.22E7  
 ZHAOSHUJUAN-27#23-66 RT: 0.10-0.29 AV: 44 T: FTMS + p ESI Full lock ms [100.0000-750.0000]

NL: 6.68E5  
 C<sub>11</sub>H<sub>7</sub>N<sub>2</sub>ClF<sub>5</sub>  
 C<sub>11</sub>H<sub>7</sub>N<sub>2</sub>Cl<sub>1</sub>F<sub>5</sub>  
 pa Chrg 1

### Spectrogram copies of compound **3k**

#### $^1\text{H}$ NMR copy of compound **3k**

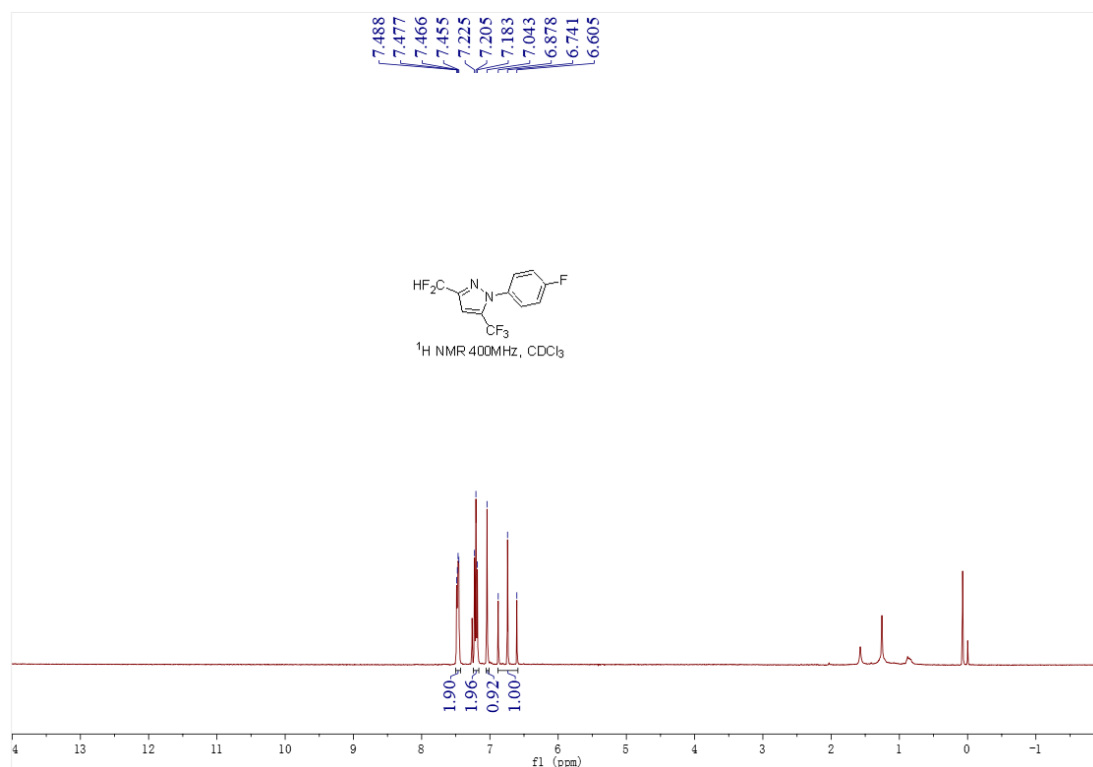

#### $^{13}\text{C}$ NMR copy of compound **3k**

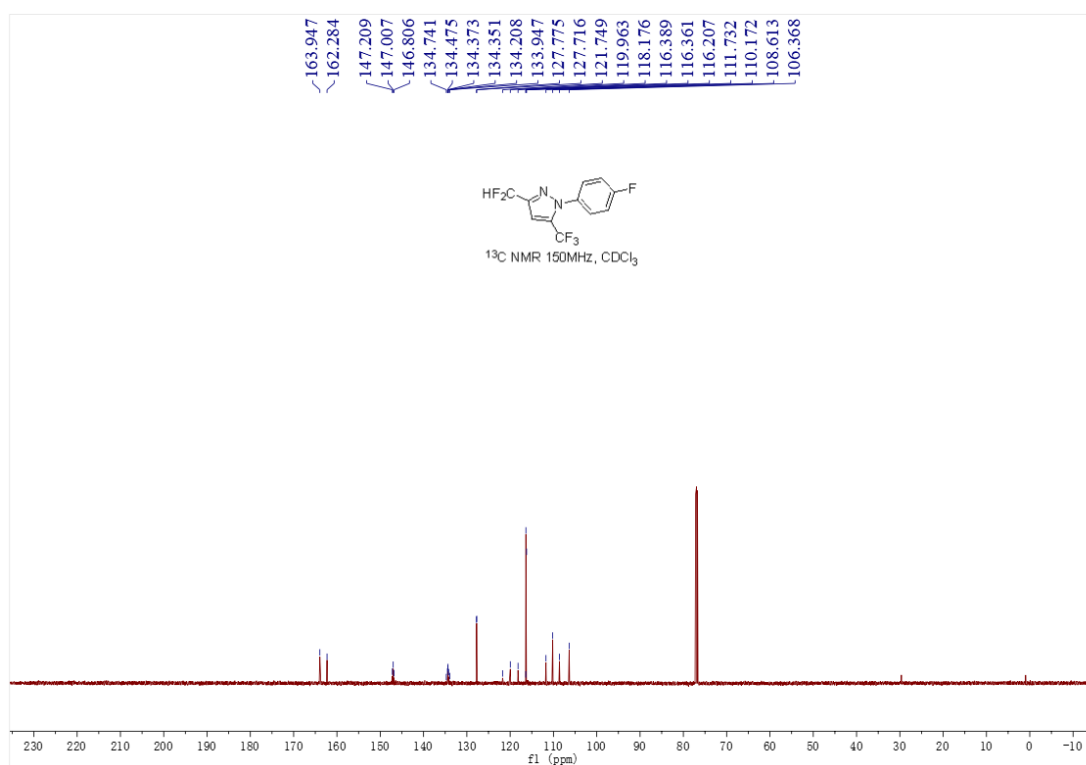

<sup>19</sup>F NMR copy of compound **3k**

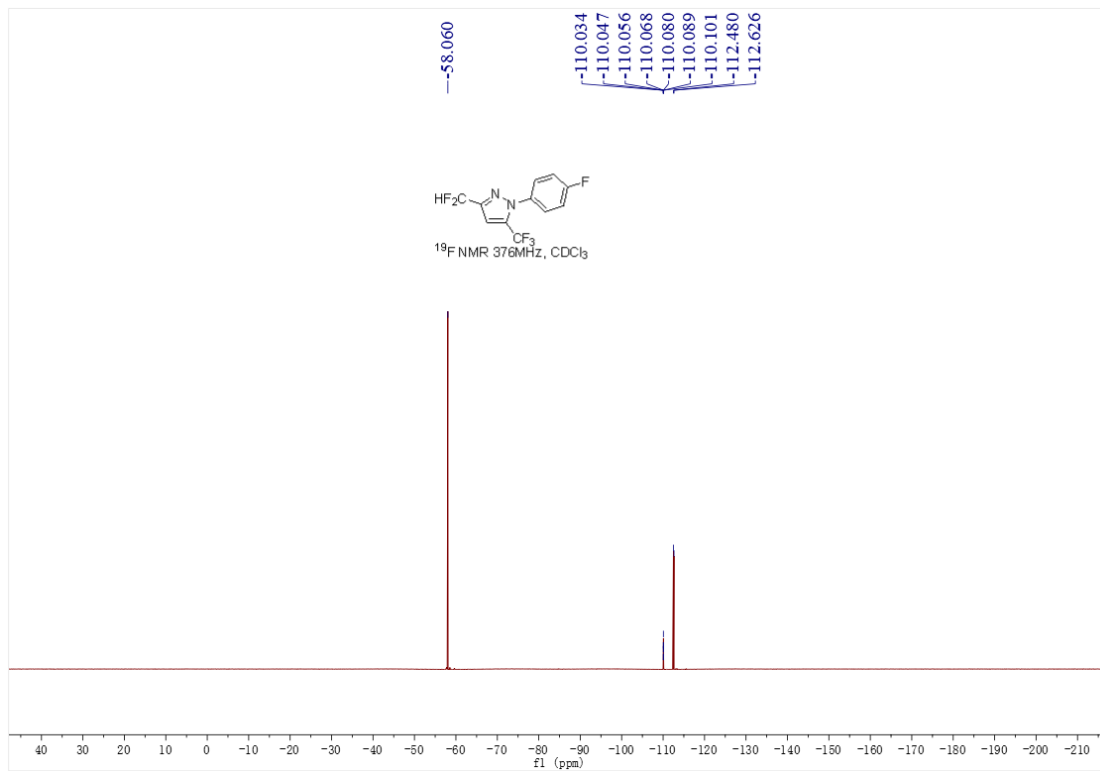

HRMS copy of compound **3k**

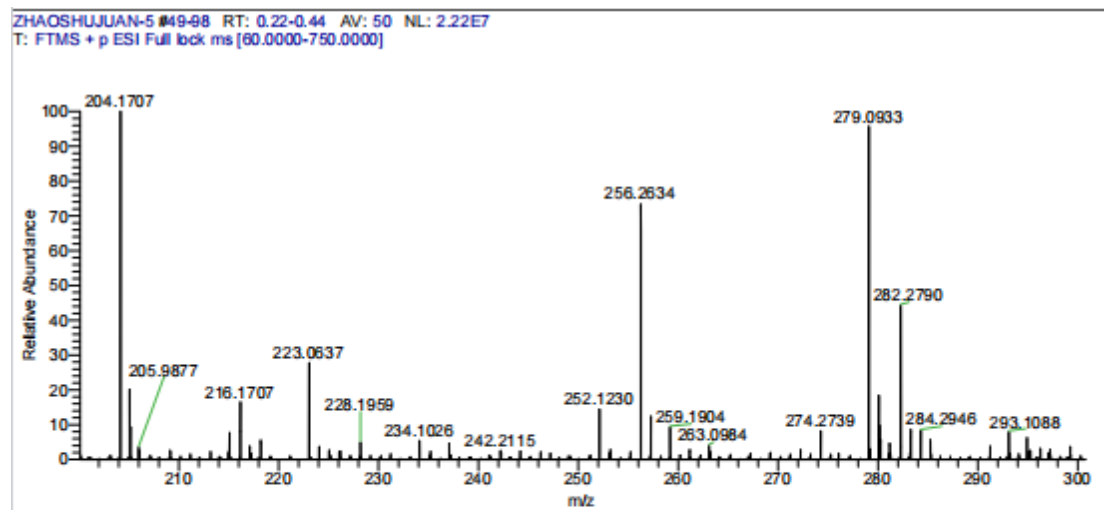

ZHAOSHUJUAN-5#49-98 RT: 0.22-0.44 AV: 50  
T: FTMS + p ESI Full lock ms [60.0000-750.0000]  
m/z = 280.9402-281.1298

| m/z      | Intensity | Relative | Theo. Mass | Delta (ppm) | Composition                                                  |
|----------|-----------|----------|------------|-------------|--------------------------------------------------------------|
| 280.9614 | 16141.6   | 4.28     | 281.0508   | -89.43      | C <sub>11</sub> H <sub>7</sub> N <sub>2</sub> F <sub>6</sub> |
| 281.0512 | 79332.8   | 21.03    | 281.0508   | 0.38        | C <sub>11</sub> H <sub>7</sub> N <sub>2</sub> F <sub>6</sub> |
| 281.0785 | 1387.1    | 0.37     | 281.0508   | 27.66       | C <sub>11</sub> H <sub>7</sub> N <sub>2</sub> F <sub>6</sub> |
| 281.1000 | 377319.3  | 100.00   | 281.0508   | 49.23       | C <sub>11</sub> H <sub>7</sub> N <sub>2</sub> F <sub>6</sub> |

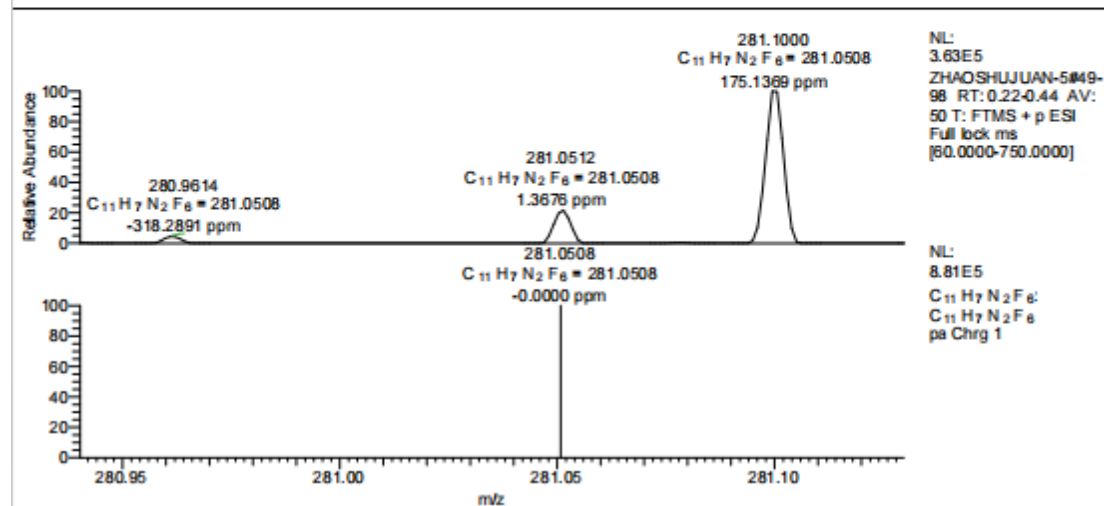

# Spectrogram copies of compound **31**

## <sup>1</sup>H NMR copy of compound **31**

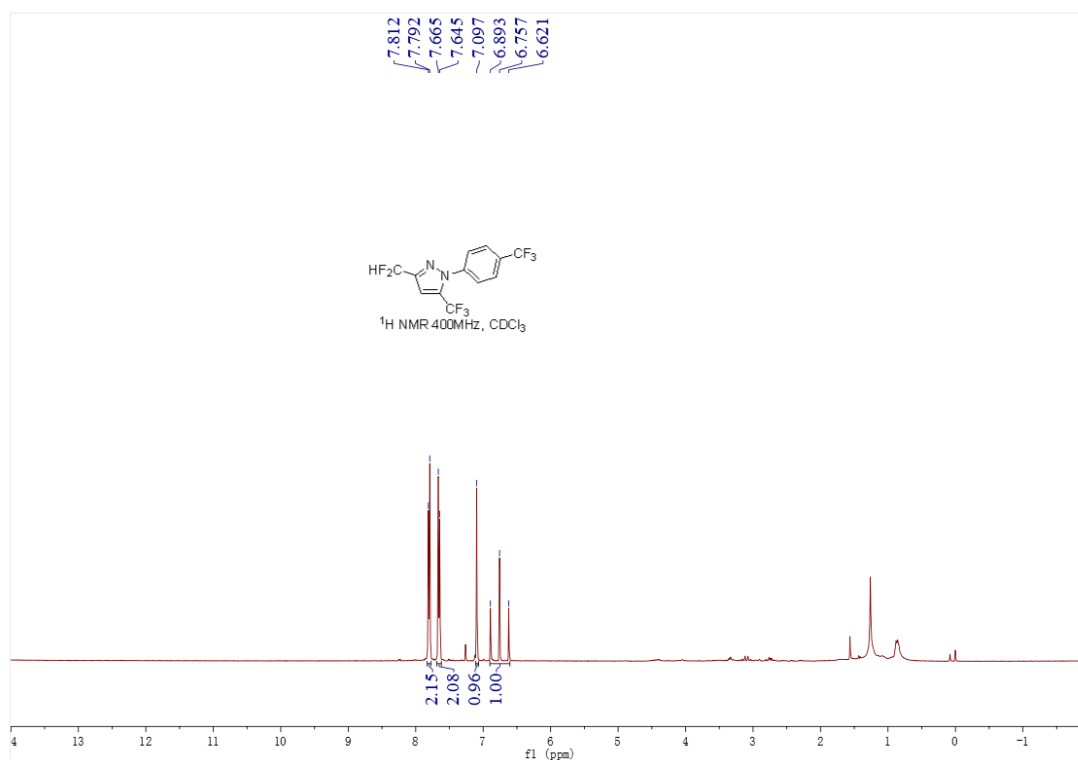

## <sup>13</sup>C NMR copy of compound **31**

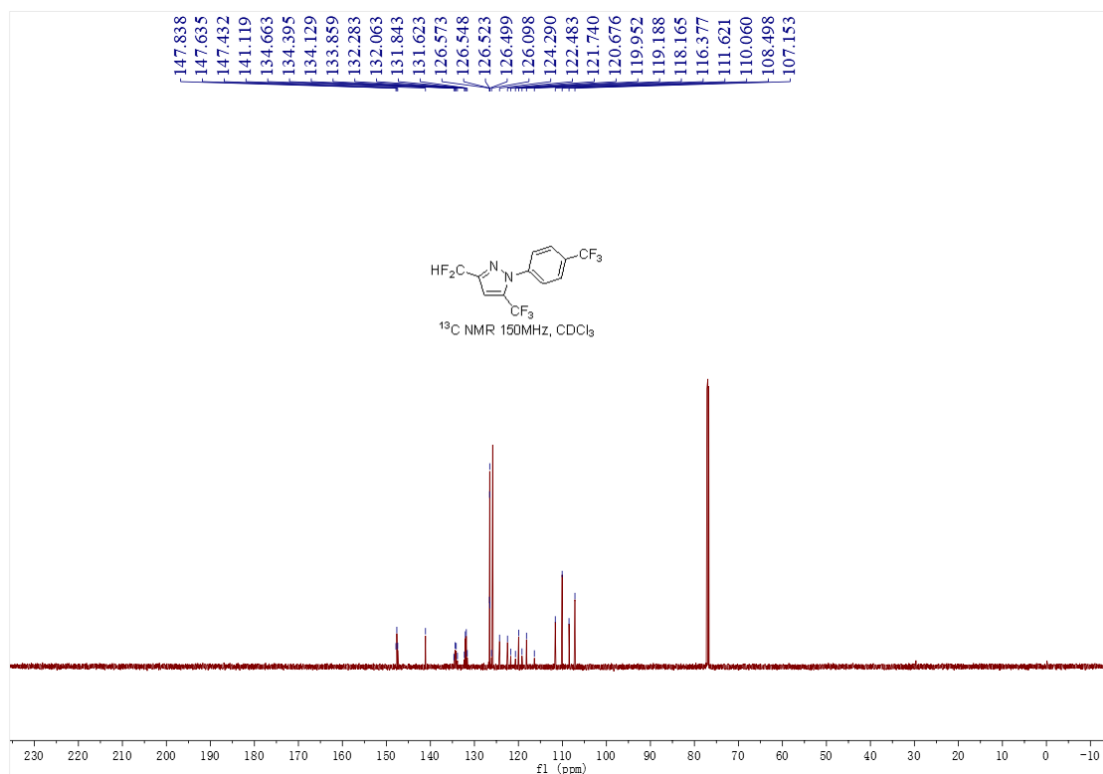

<sup>19</sup>F NMR copy of compound **31**

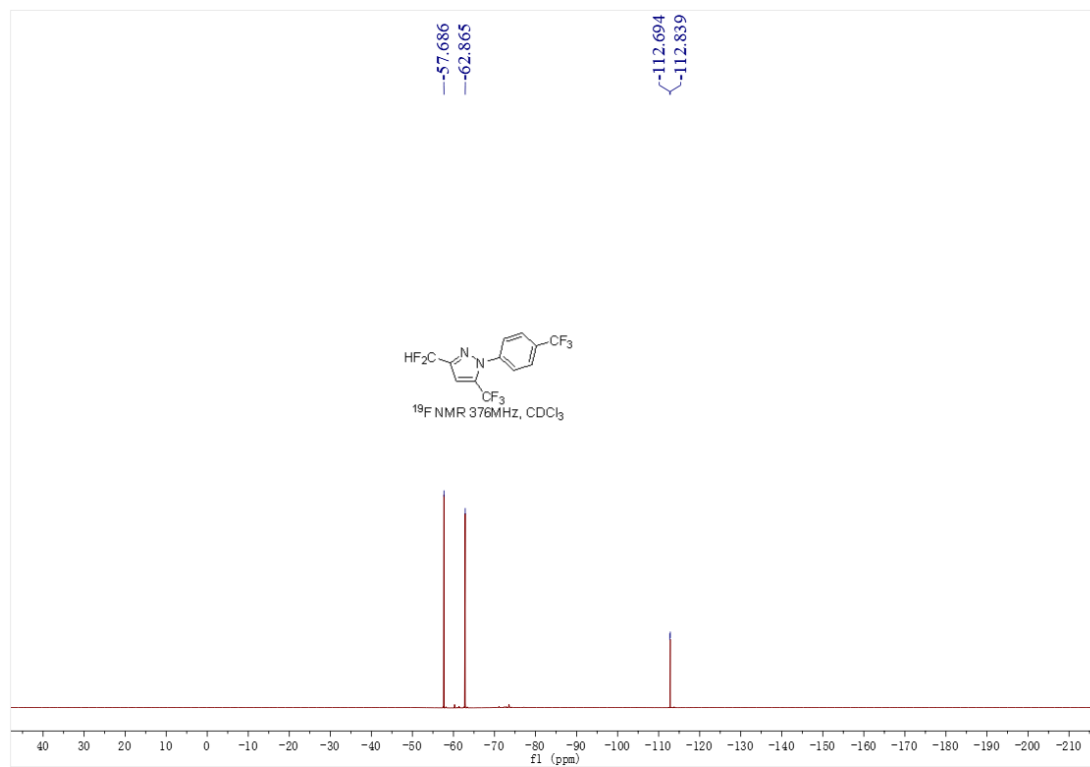

# HRMS copy of compound 31

ZHAOSHUJUAN-12#33-80 RT: 0.15-0.36 AV: 48 NL: 8.32E7  
T: FTMS + p ESI Full lock ms [150.0000-750.0000]

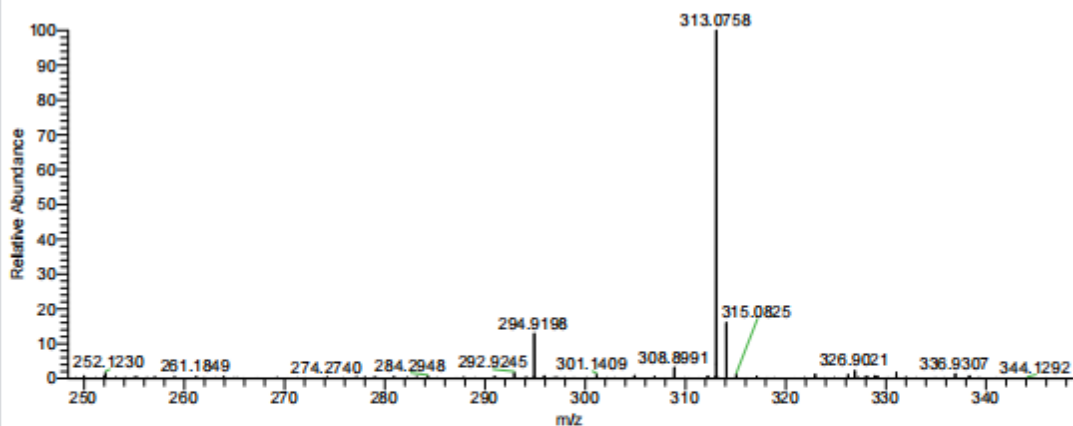

ZHAOSHUJUAN-12#33-80 RT: 0.15-0.36 AV: 48  
T: FTMS + p ESI Full lock ms [150.0000-750.0000]  
m/z= 328.6993-334.1059

| m/z      | Intensity | Relative | Theo. Mass | Delta (ppm) | Composition                                                  |
|----------|-----------|----------|------------|-------------|--------------------------------------------------------------|
| 328.8990 | 614642.5  | 42.43    |            |             |                                                              |
| 329.0705 | 201316.8  | 13.90    |            |             |                                                              |
| 329.1567 | 556355.9  | 38.40    |            |             |                                                              |
| 331.0476 | 1448706.8 | 100.00   | 331.0476   | -0.03       | C <sub>12</sub> H <sub>7</sub> N <sub>2</sub> F <sub>8</sub> |
| 331.9519 | 181494.6  | 12.53    |            |             |                                                              |

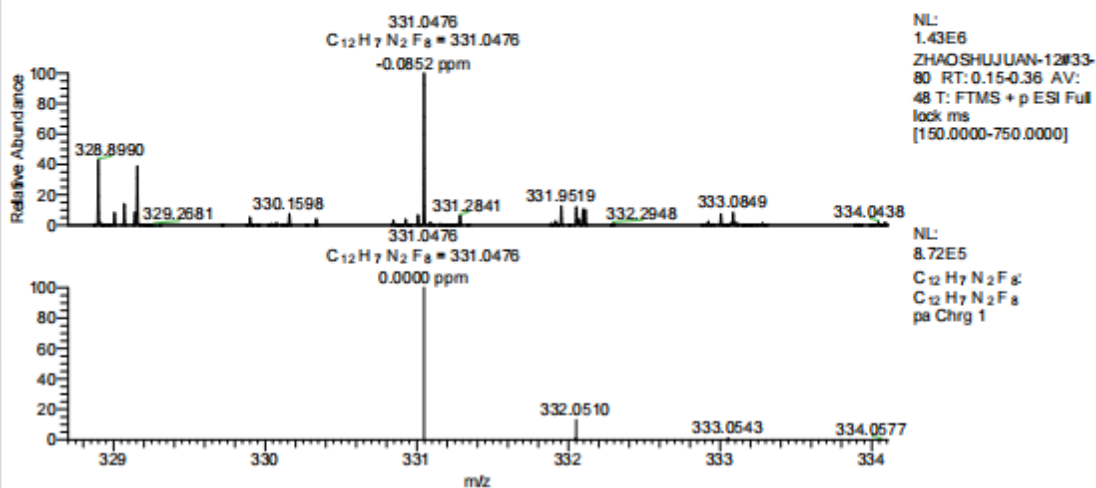



### Spectrogram copies of compound **3m**

#### <sup>1</sup>H NMR copy of compound **3m**

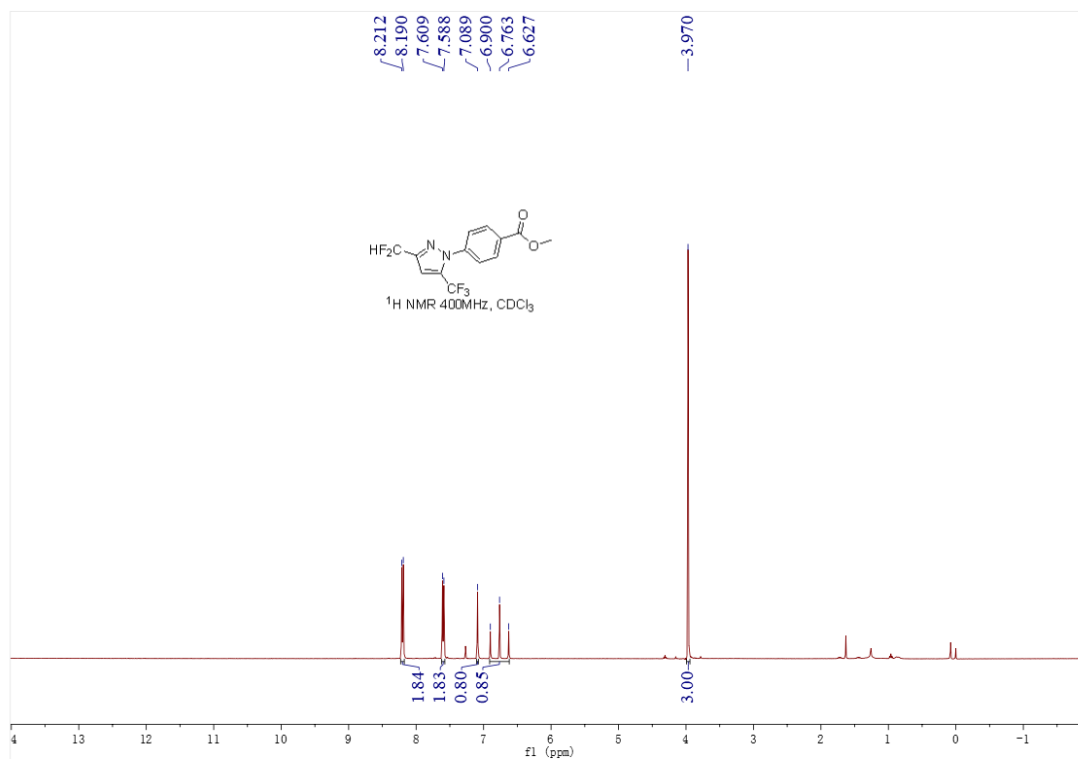

#### <sup>13</sup>C NMR copy of compound **3m**

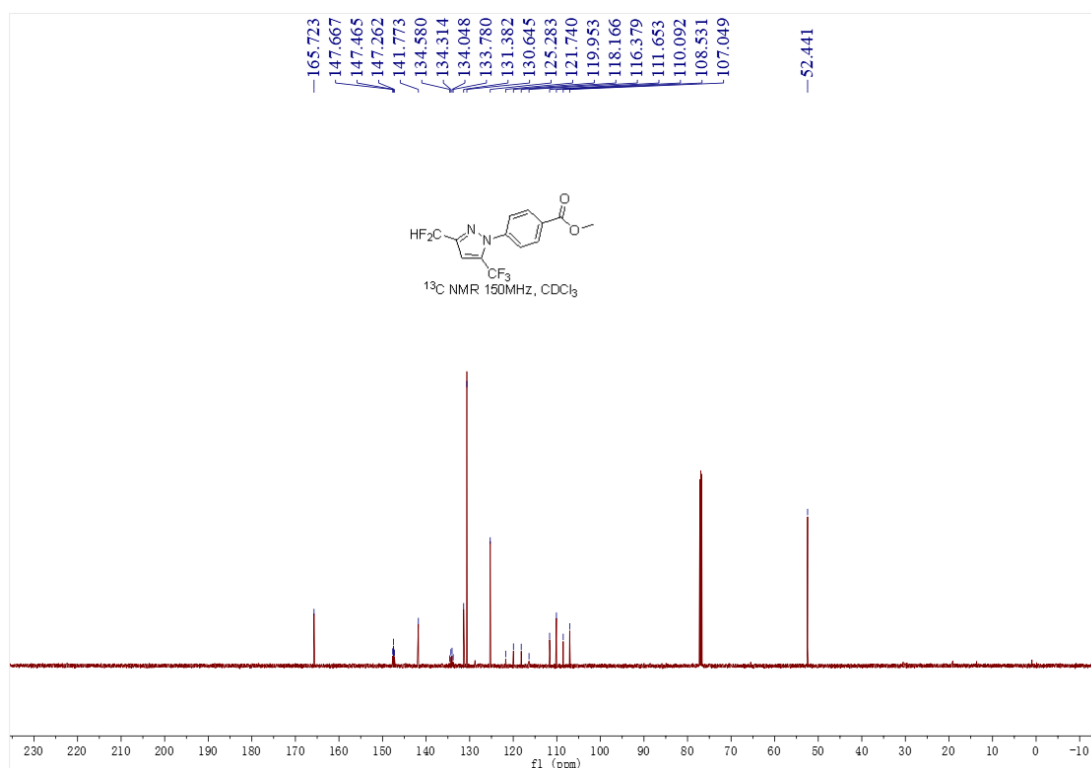

<sup>19</sup>F NMR copy of compound **3m**

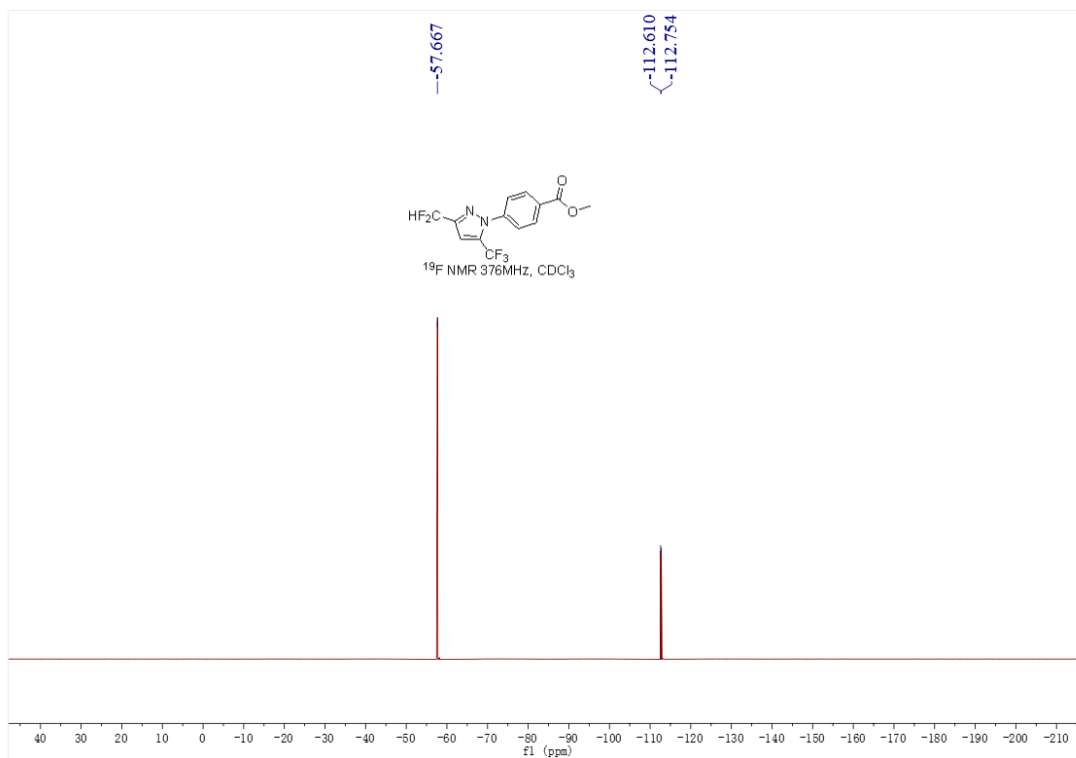

# HRMS copy of compound 3m

WANGRUIKANG-14#17-64 RT: 0.08-0.29 AV: 48 NL: 6.46E7  
T: FTMS + p ESI Full lock ms [150.0000-900.0000]

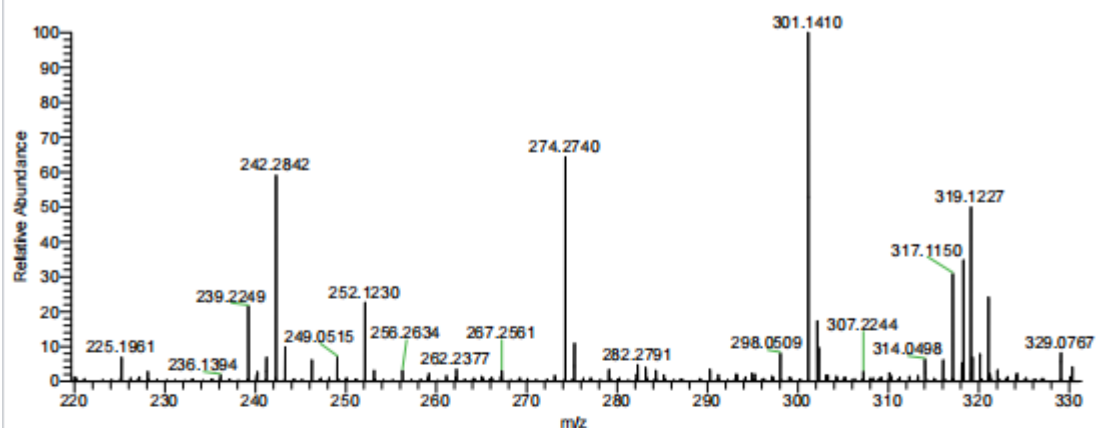

WANGRUIKANG-14#17-64 RT: 0.08-0.29 AV: 48  
T: FTMS + p ESI Full lock ms [150.0000-900.0000]  
m/z = 320.0302-322.0788

| m/z      | Intensity  | Relative | Theo. Mass | Delta (ppm) | Composition                                                                  |
|----------|------------|----------|------------|-------------|------------------------------------------------------------------------------|
| 320.1262 | 5061979.0  | 32.42    |            |             |                                                                              |
| 321.0656 | 15611620.0 | 100.00   | 321.0657   | -0.06       | C <sub>13</sub> H <sub>10</sub> O <sub>2</sub> N <sub>2</sub> F <sub>5</sub> |
| 321.1303 | 633401.8   | 4.06     | 321.0657   | 64.62       | C <sub>13</sub> H <sub>10</sub> O <sub>2</sub> N <sub>2</sub> F <sub>5</sub> |
| 321.2400 | 1402895.0  | 8.99     | 321.0657   | 174.33      | C <sub>13</sub> H <sub>10</sub> O <sub>2</sub> N <sub>2</sub> F <sub>5</sub> |
| 322.0691 | 2093958.4  | 13.41    |            |             |                                                                              |

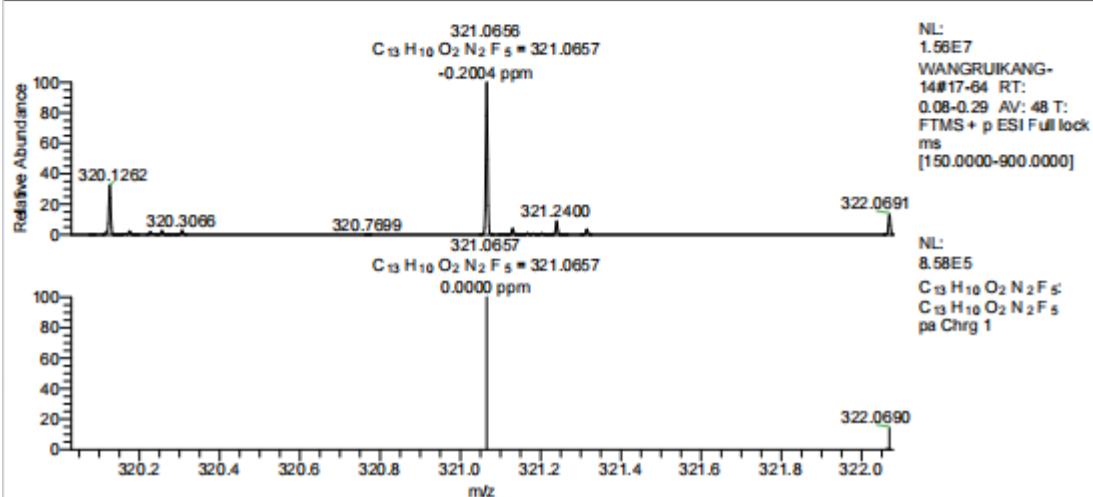

### Spectrogram copies of compound **3n**

#### $^1\text{H}$ NMR copy of compound **3n**

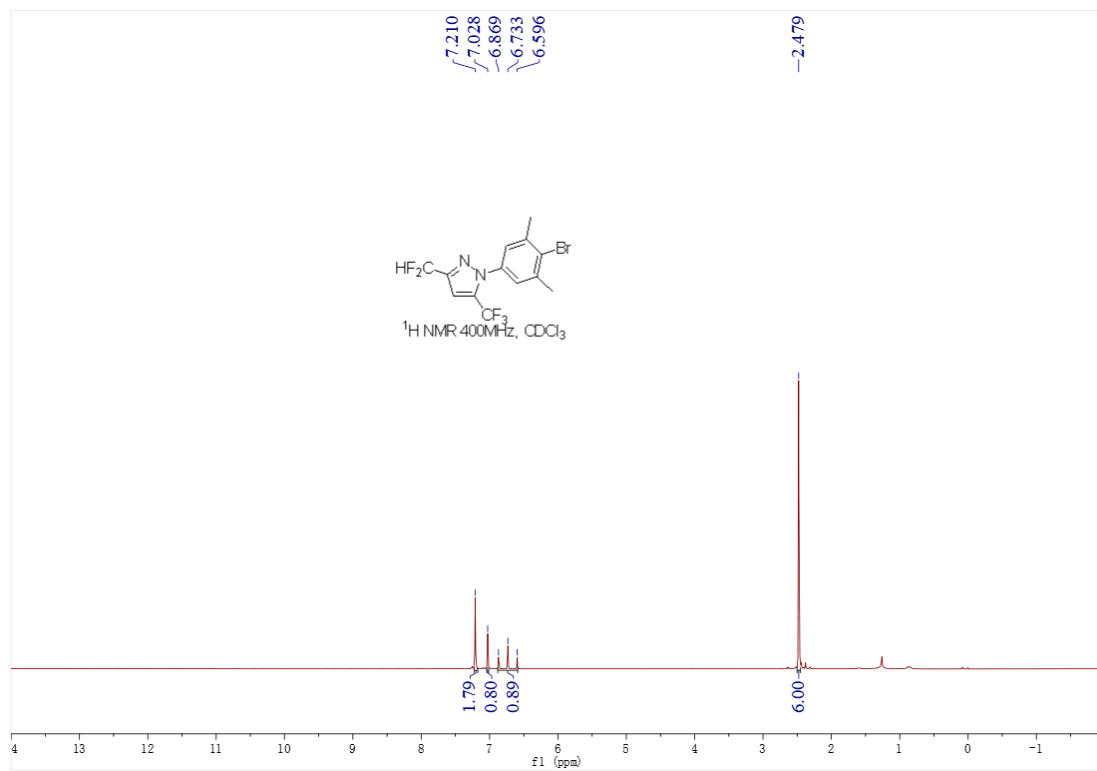

#### $^{13}\text{C}$ NMR copy of compound **3n**

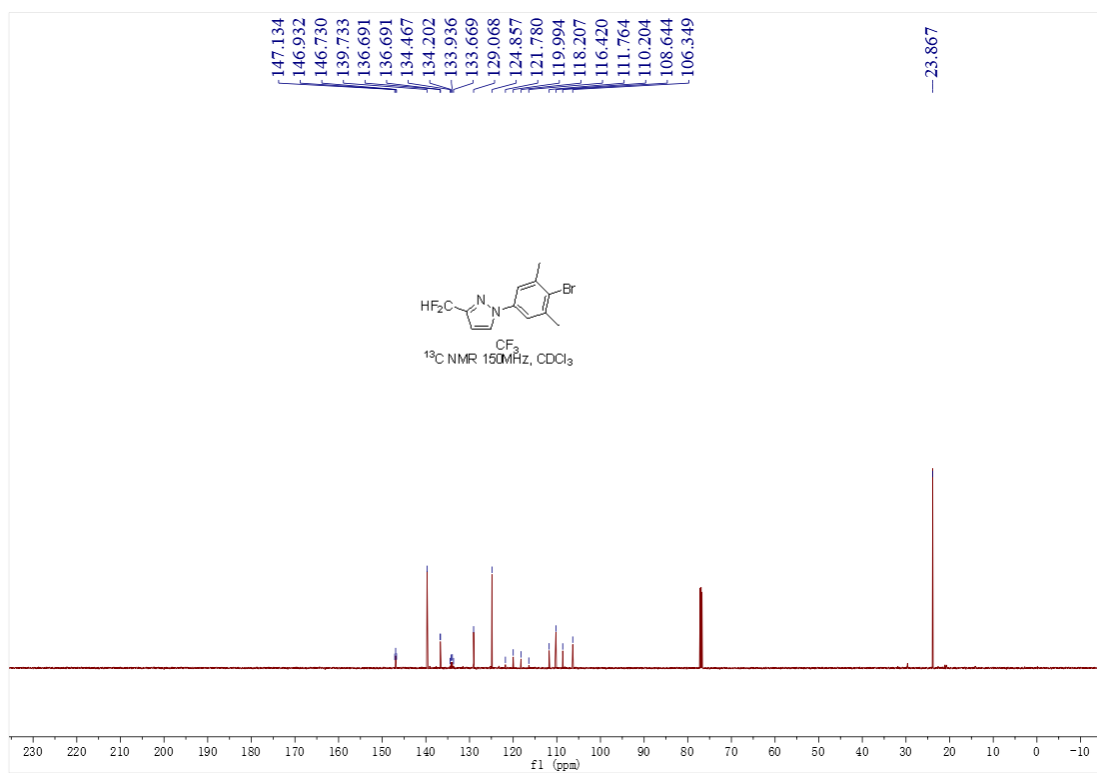

<sup>19</sup>F NMR copy of compound **3n**

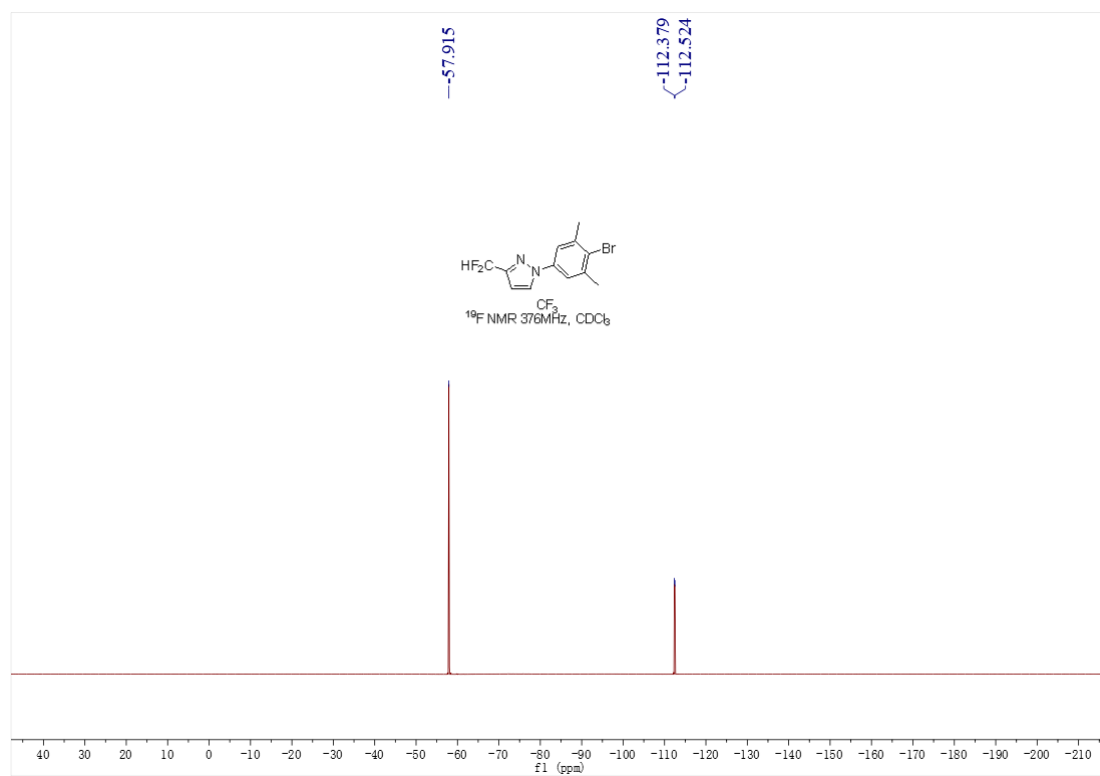

# HRMS copy of compound 3n

ZHAOSHUJUAN-8 #18-68 RT: 0.08-0.30 AV: 51 NL: 1.50E7  
T: FTMS + p ESI Full lock ms [60.0000-750.0000]

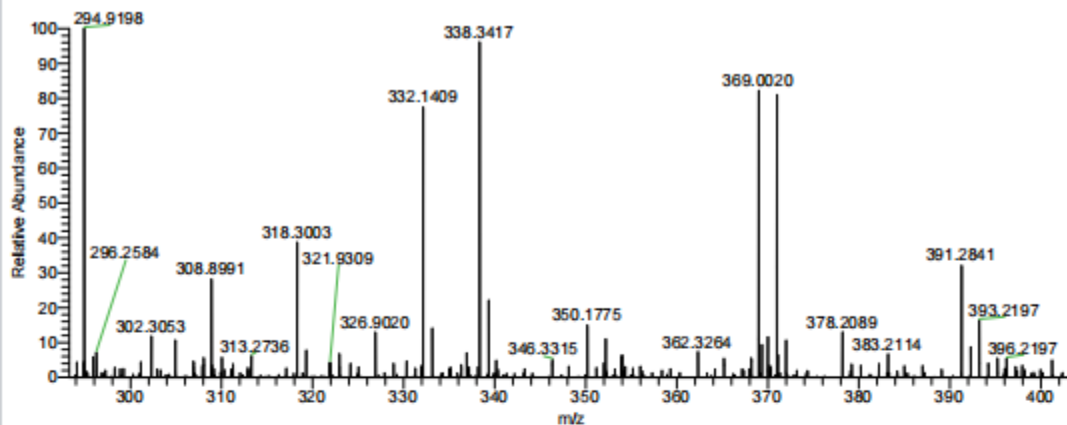

ZHAOSHUJUAN-8 #18-68 RT: 0.08-0.30 AV: 51  
T: FTMS + p ESI Full lock ms [60.0000-750.0000]  
m/z = 384.0804-385.5453

| m/z      | Intensity | Relative | Theo. Mass | Delta (ppm) | Composition                                                        |
|----------|-----------|----------|------------|-------------|--------------------------------------------------------------------|
| 384.2177 | 258029.2  | 51.30    |            |             |                                                                    |
| 384.9968 | 503013.9  | 100.00   | 384.9969   | -0.19       | C <sub>13</sub> H <sub>11</sub> O N <sub>2</sub> Br F <sub>5</sub> |
| 385.0730 | 202115.4  | 40.18    | 384.9969   | 76.10       | C <sub>13</sub> H <sub>11</sub> O N <sub>2</sub> Br F <sub>5</sub> |
| 385.2003 | 48659.7   | 9.67     | 384.9969   | 203.32      | C <sub>13</sub> H <sub>11</sub> O N <sub>2</sub> Br F <sub>5</sub> |
| 385.3464 | 173504.5  | 34.49    | 384.9969   | 349.45      | C <sub>13</sub> H <sub>11</sub> O N <sub>2</sub> Br F <sub>5</sub> |

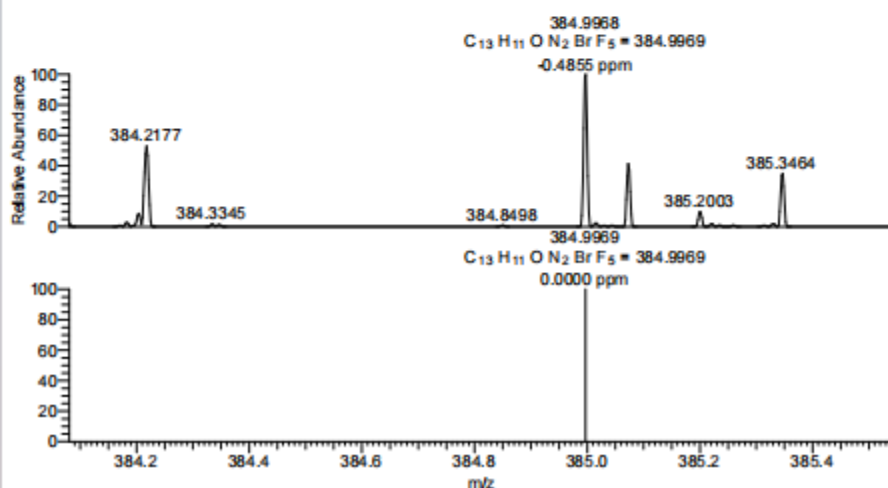

NL:  
4.87E5  
ZHAOSHUJUAN-8#18-68 RT: 0.08-0.30 AV: 51 T: FTMS + p ESI Full lock ms [60.0000-750.0000]

NL:  
4.36E5  
C<sub>13</sub>H<sub>10</sub>N<sub>2</sub>BrF<sub>5</sub>OH:  
C<sub>13</sub>H<sub>11</sub>N<sub>2</sub>BrF<sub>5</sub>O<sub>1</sub>  
pa Chrg 1

Spectrogram copies of compound **3o**

<sup>1</sup>H NMR copy of compound **3o**

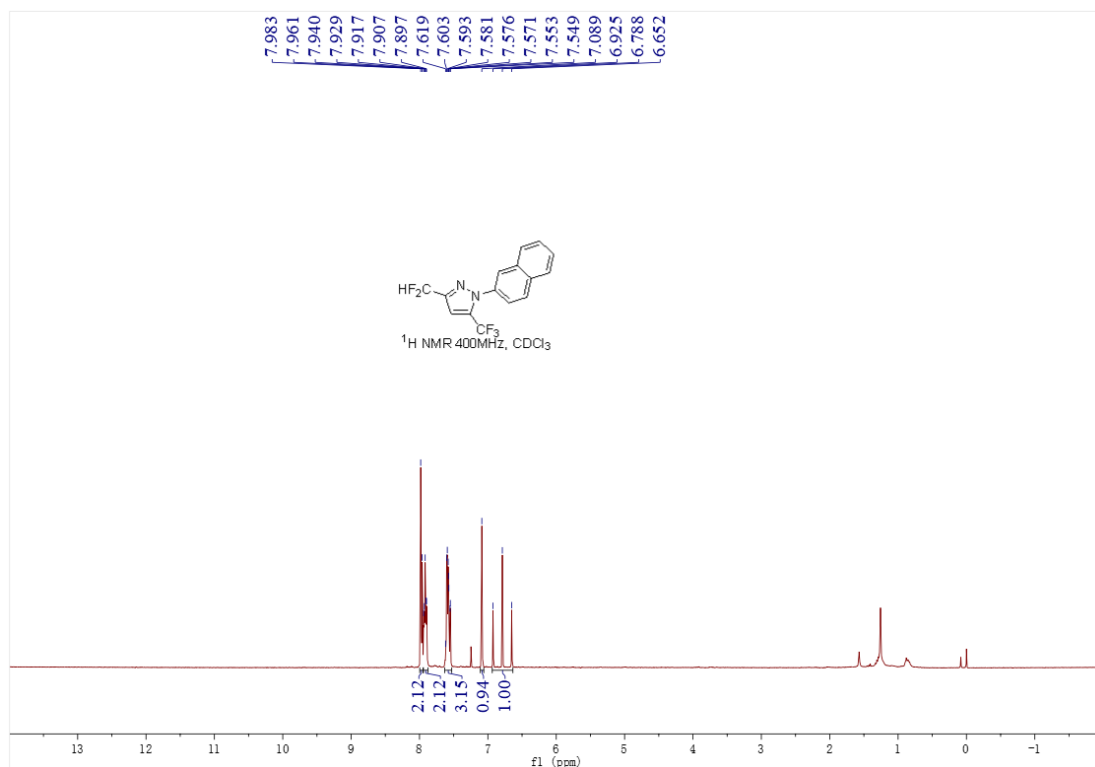

<sup>13</sup>C NMR copy of compound **3o**

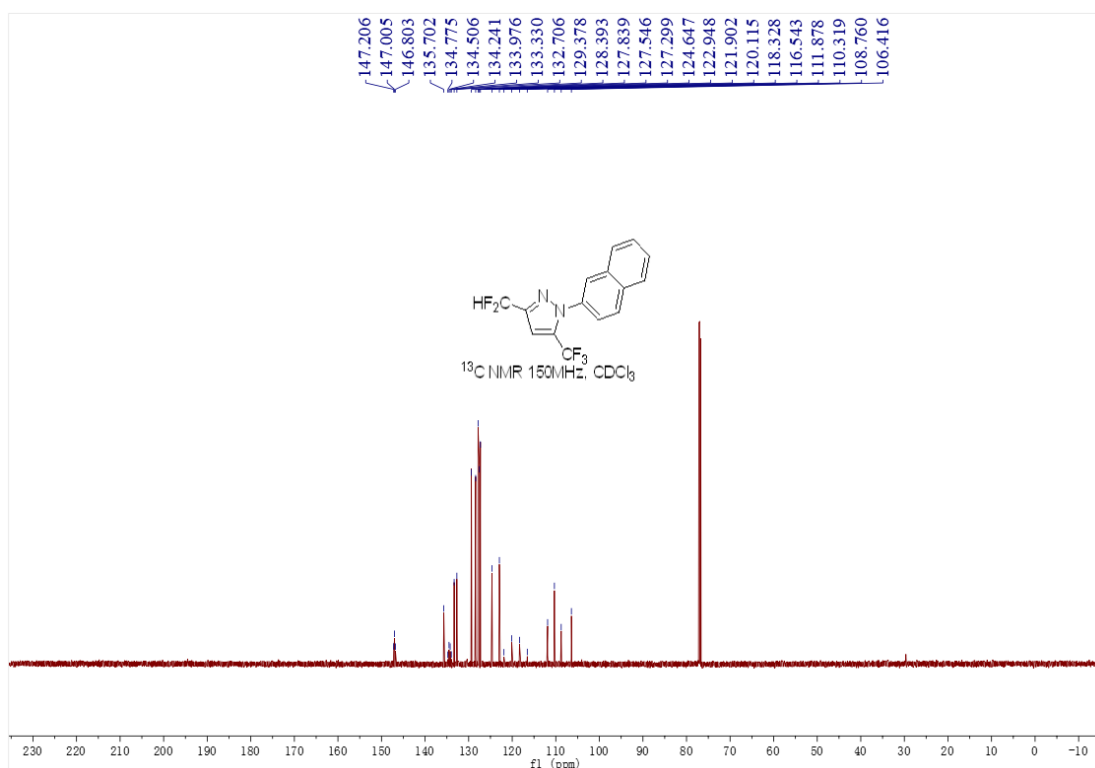

<sup>19</sup>F NMR copy of compound **3o**

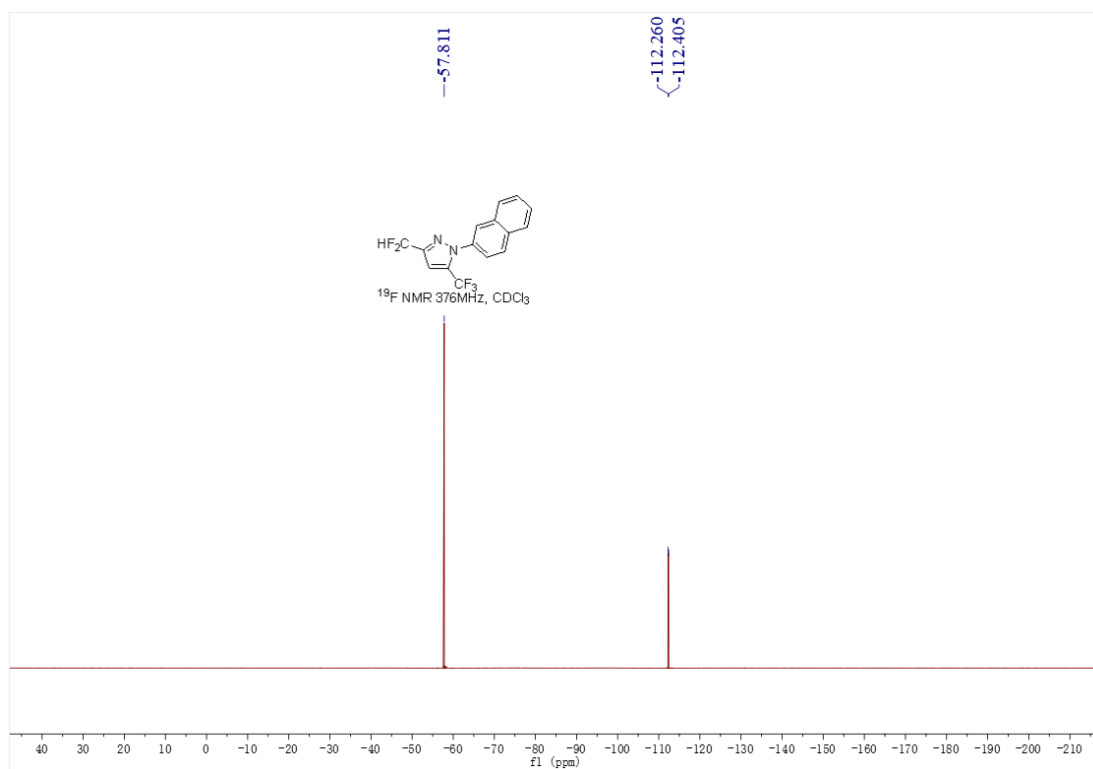



# HRMS copy of compound 3o

ZHAOSHUJUAN-9#21-65 RT: 0.09-0.29 AV: 45 NL: 5.73E8  
 T: FTMS + p ESI Full lock ms [150.0000-750.0000]

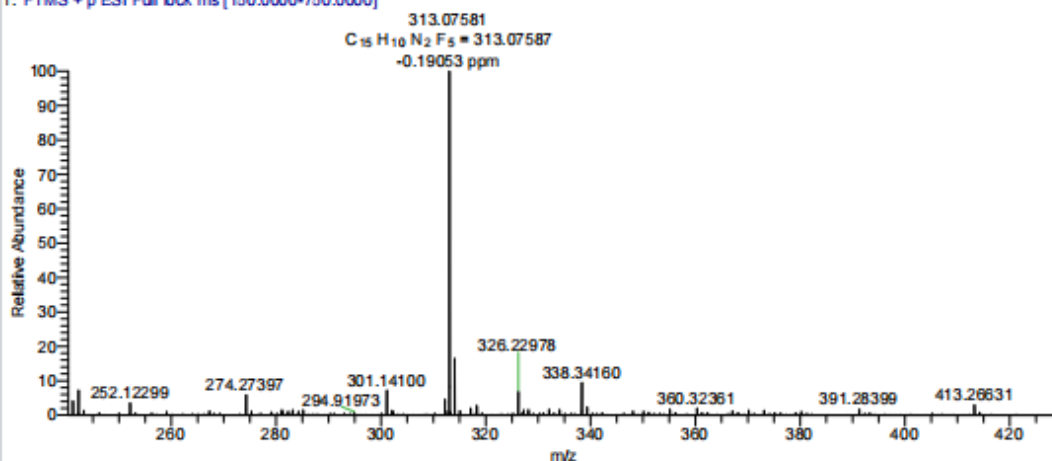

ZHAOSHUJUAN-9#21-65 RT: 0.09-0.29 AV: 45  
 T: FTMS + p ESI Full lock ms [150.0000-750.0000]  
 m/z= 240.31556-429.87852

| m/z       | Intensity   | Relative | Theo. Mass | Delta (ppm) | Composition                                                   |
|-----------|-------------|----------|------------|-------------|---------------------------------------------------------------|
| 242.28421 | 42824316.0  | 7.31     |            |             |                                                               |
| 301.14100 | 42620976.0  | 7.28     |            |             |                                                               |
| 313.07581 | 585620544.0 | 100.00   | 313.07587  | -0.06       | C <sub>15</sub> H <sub>10</sub> N <sub>2</sub> F <sub>5</sub> |
| 314.07888 | 94805536.0  | 16.19    |            |             |                                                               |
| 338.34160 | 54612028.0  | 9.33     |            |             |                                                               |

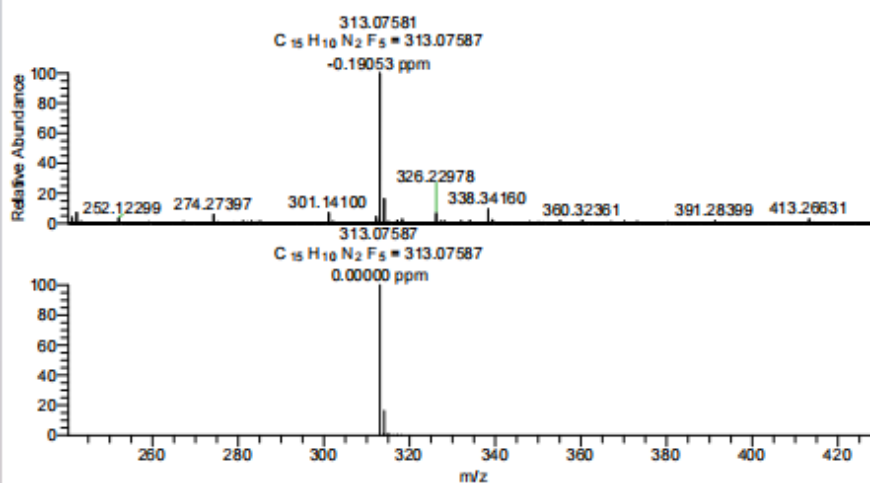

NL:  
 5.73E8  
 ZHAOSHUJUAN-9#21-  
 65 RT: 0.09-0.29 AV:  
 45 T: FTMS + p ESI  
 Full lock ms  
 [150.0000-750.0000]

NL:  
 8.44E5  
 C<sub>15</sub>H<sub>10</sub>N<sub>2</sub>F<sub>5</sub>:  
 C<sub>15</sub>H<sub>10</sub>N<sub>2</sub>F<sub>5</sub>  
 pa Chrg 1

Spectrogram copies of compound **3a'**

$^1\text{H}$  NMR copy of compound **3a'**

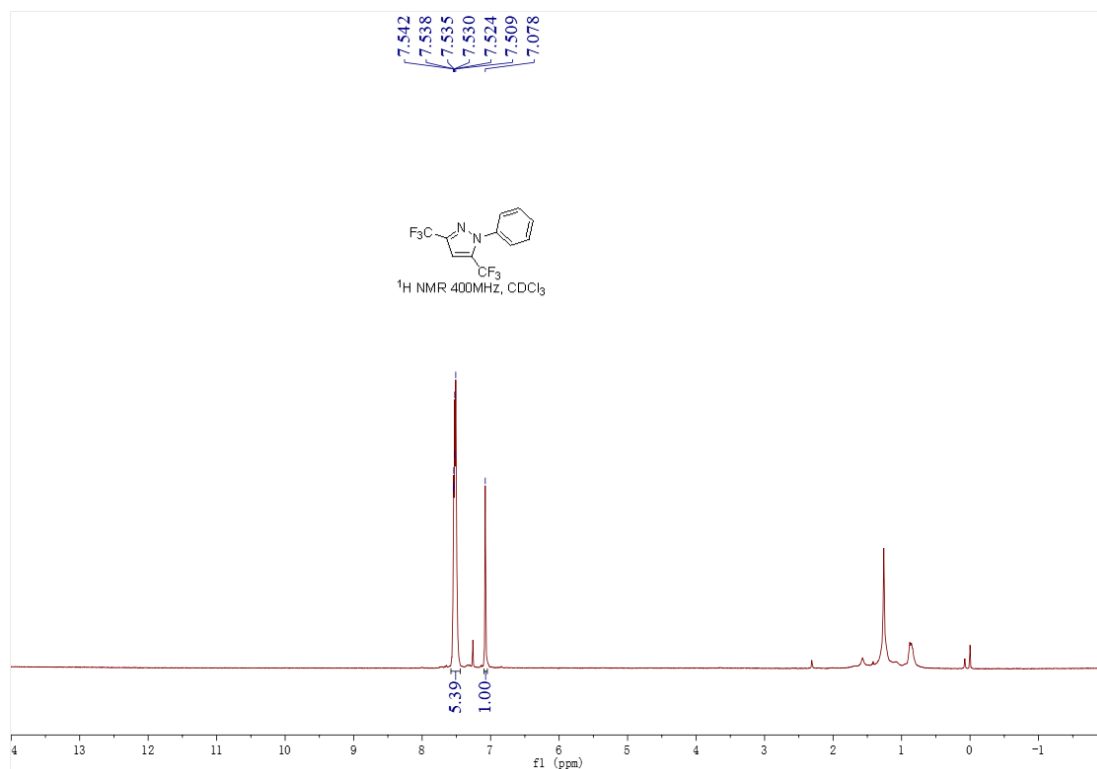

$^{13}\text{C}$  NMR copy of compound **3a'**

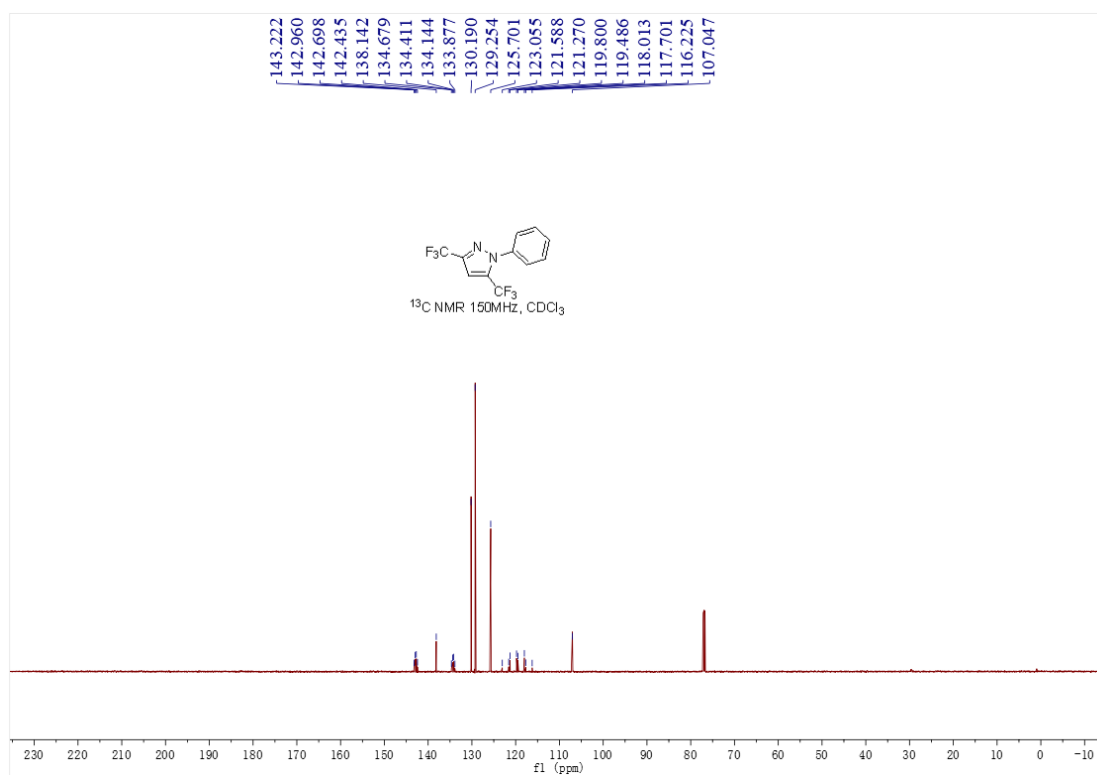

<sup>19</sup>F NMR copy of compound **3a'**

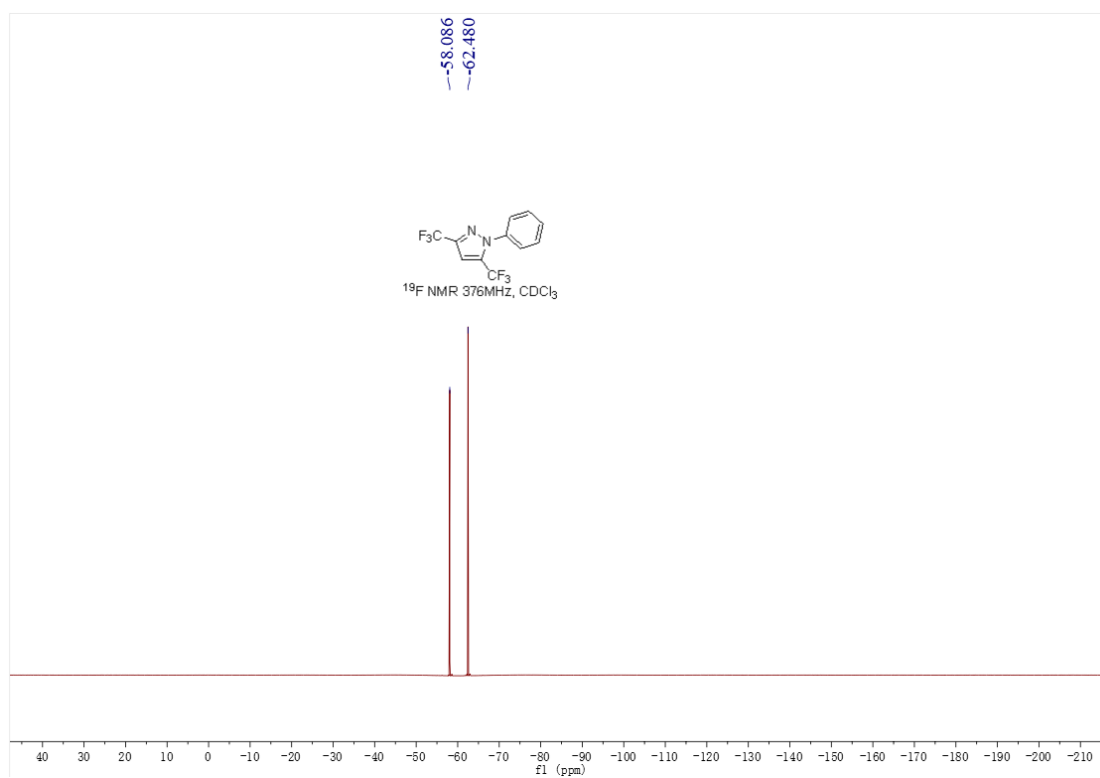

# HRMS copy of compound 3a'

WANGRUIKANG-18#25-72 RT: 0.11-0.32 AV: 48 NL: 2.57E7  
 T: FTMS + p ESI Full lock ms [60.0000-900.0000]

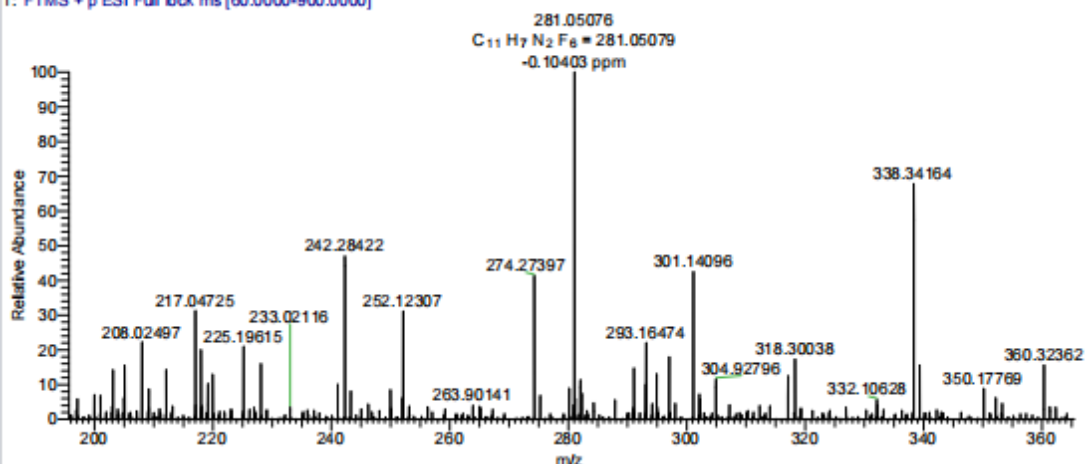

WANGRUIKANG-18#25-72 RT: 0.11-0.32 AV: 48  
 T: FTMS + p ESI Full lock ms [60.0000-900.0000]

m/z = 195.67604-365.10405

| m/z       | Intensity  | Relative | Theo. Mass | Delta (ppm) | Composition                                                  |
|-----------|------------|----------|------------|-------------|--------------------------------------------------------------|
| 242.28422 | 12262807.0 | 47.29    |            |             |                                                              |
| 274.27397 | 10737153.0 | 41.40    |            |             |                                                              |
| 281.05076 | 25933474.0 | 100.00   | 281.05079  | -0.03       | C <sub>11</sub> H <sub>7</sub> N <sub>2</sub> F <sub>6</sub> |
| 301.14096 | 11039279.0 | 42.57    |            |             |                                                              |
| 338.34164 | 17449414.0 | 67.29    |            |             |                                                              |

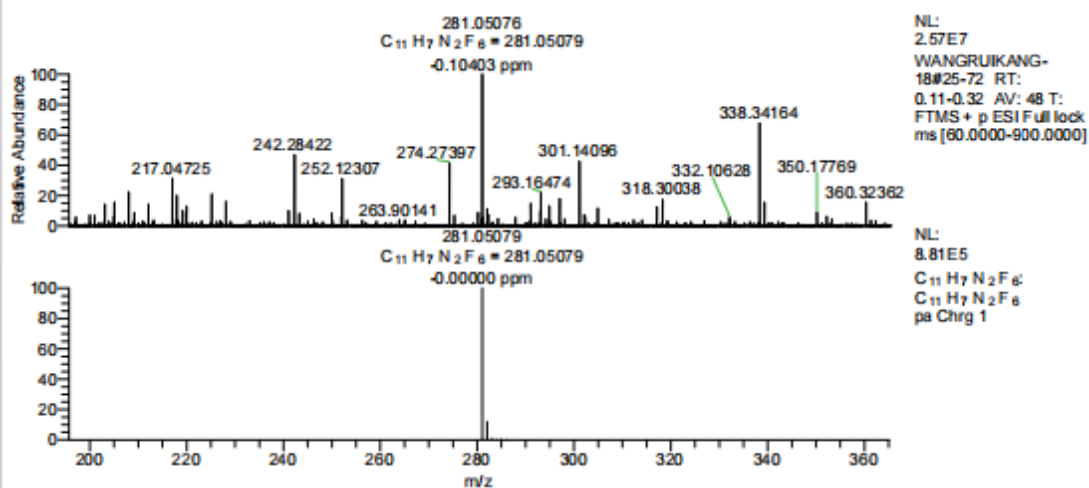

Spectrogram copies of compound **3b'**

$^1\text{H}$  NMR copy of compound **3b'**

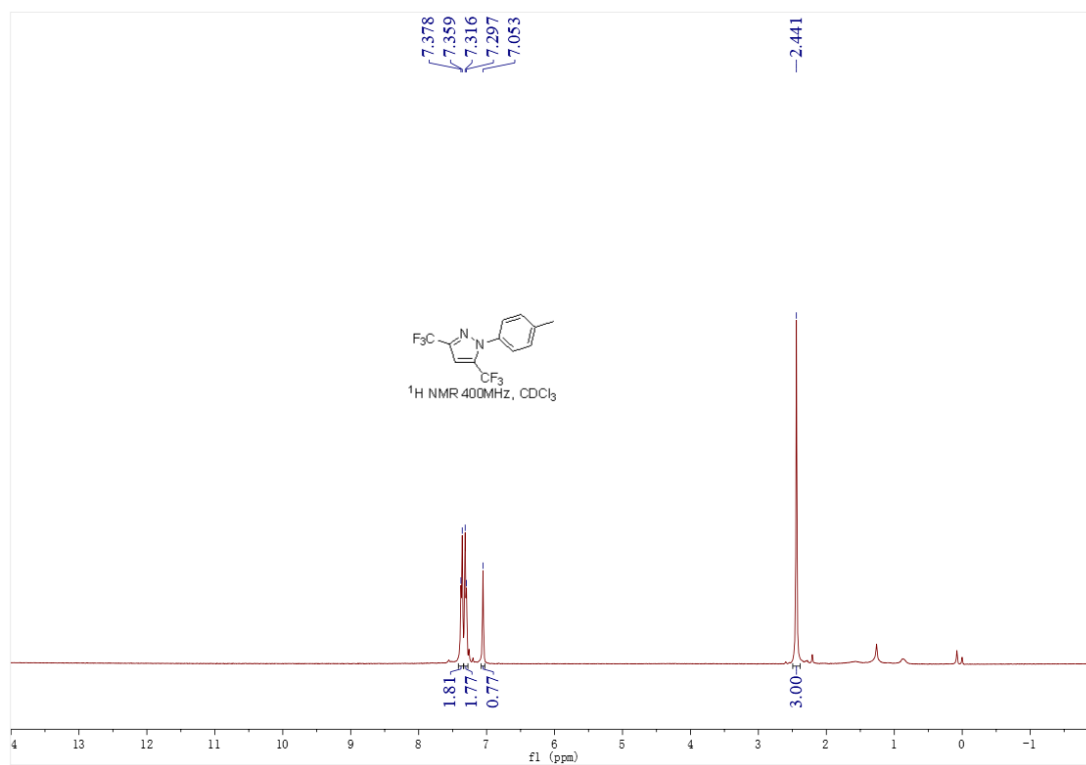

$^{13}\text{C}$  NMR copy of compound **3b'**

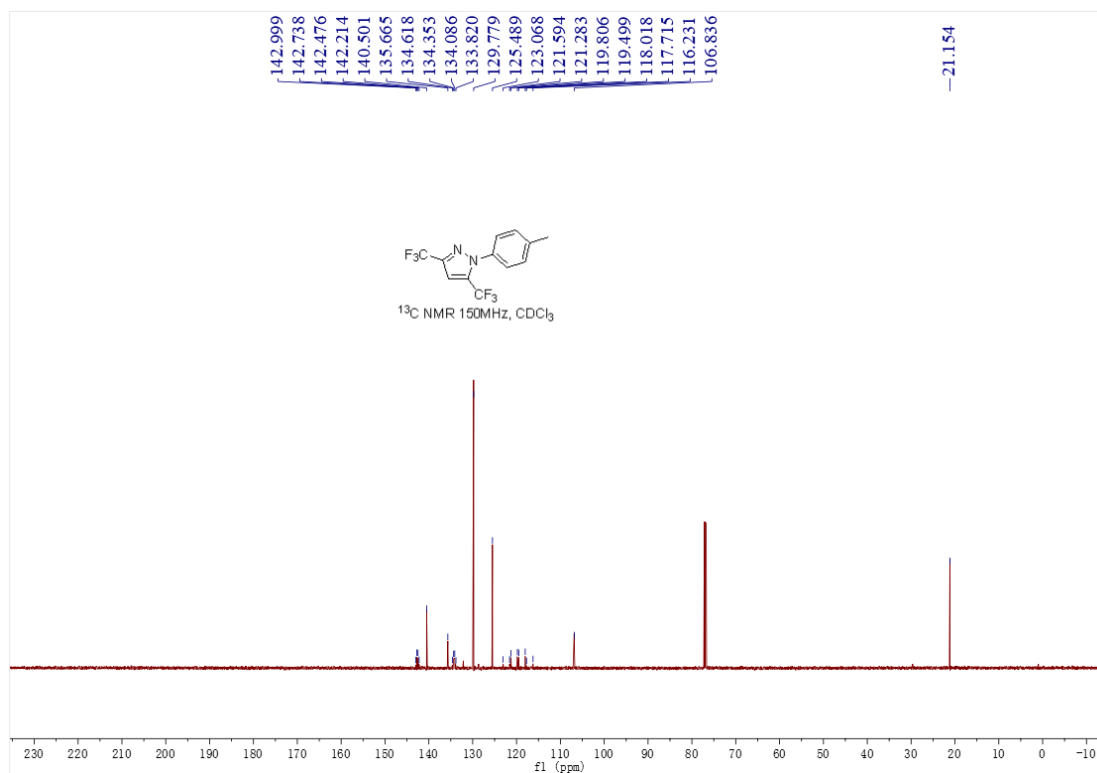

<sup>19</sup>F NMR copy of compound **3b'**

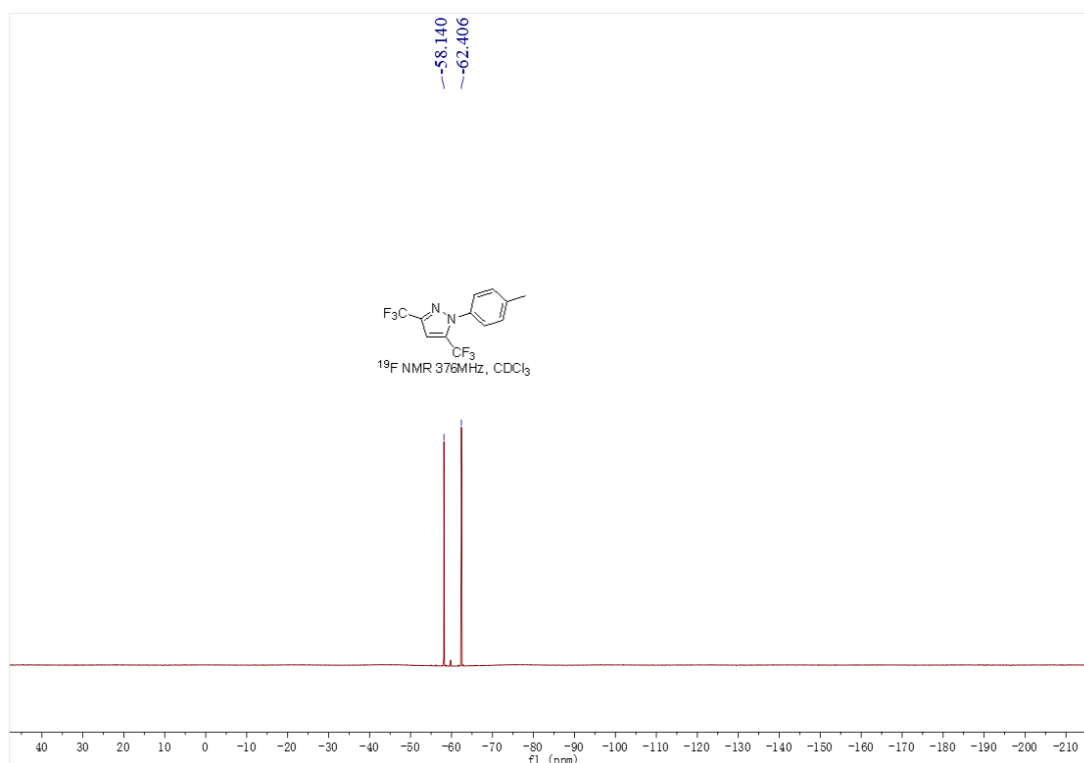

HRMS copy of compound **3b'**

Mass Spectrum SmartFormula Report

| Analysis Info |                                              | Acquisition Date  |                  |
|---------------|----------------------------------------------|-------------------|------------------|
| Analysis Name | D:\Data\user\NWNW-wangruikang 20240205--33.d | 2024-2-5          | 10:34:13         |
| Method        | tune_low.m                                   | Operator          | Huyue            |
| Sample Name   | 33                                           | Instrument / Ser# | micrOTOF-Q 20453 |
| Comment       |                                              |                   |                  |

| Acquisition Parameter |          |                       |           |                  |           |
|-----------------------|----------|-----------------------|-----------|------------------|-----------|
| Source Type           | ESI      | Ion Polarity          | Positive  | Set Nebulizer    | 0.4 Bar   |
| Focus                 | Active   | Set Capillary         | 4500 V    | Set Dry Heater   | 180 j°C   |
| Scan Begin            | 100 m/z  | Set End Plate Offset  | -500 V    | Set Dry Gas      | 4.0 l/min |
| Scan End              | 1000 m/z | Set Collision Cell RF | 400.0 Vpp | Set Divert Valve | Waste     |

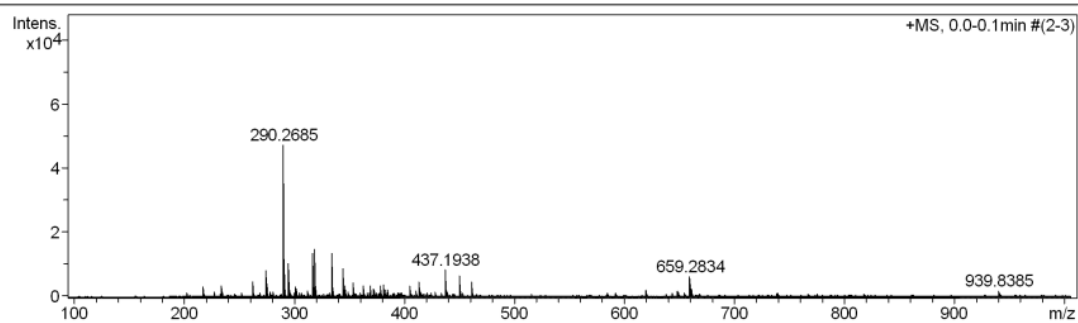

| Meas. #  | Formula                                                           | m/z      | err [ppm] | Me an err [ppm] | rdb | N-R | e <sub>j</sub> Conf | mSi gma | Std l | Std Me an m/z | Std l Var Nor m | Std m/z Diff | Std Com b Dev |
|----------|-------------------------------------------------------------------|----------|-----------|-----------------|-----|-----|---------------------|---------|-------|---------------|-----------------|--------------|---------------|
| 317.0487 | 1 C <sub>12</sub> H <sub>8</sub> F <sub>6</sub> N <sub>2</sub> Na | 317.0484 | -0.9      | -0.0            | 6.5 | ok  | even                | 11.2    | 20.8  | 0.8           | 10.1            | 2.7          | 842.7         |

Spectrogram copies of compound 3c'

<sup>1</sup>H NMR copy of compound 3c'

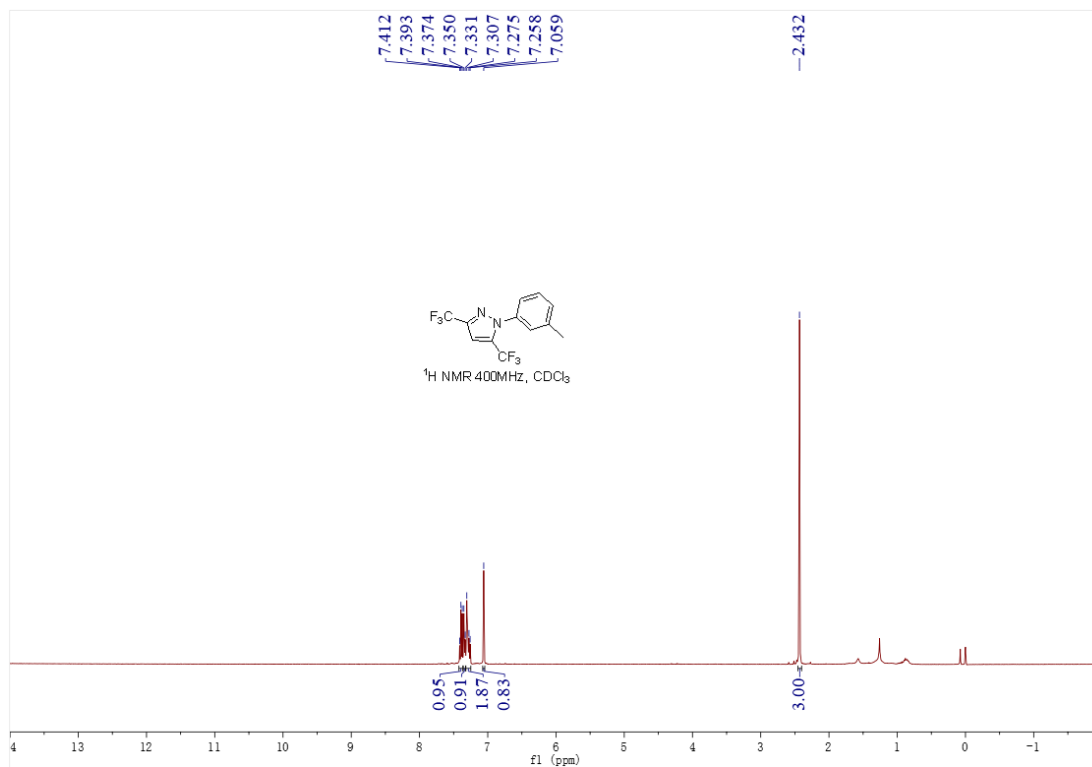

<sup>13</sup>C NMR copy of compound 3c'

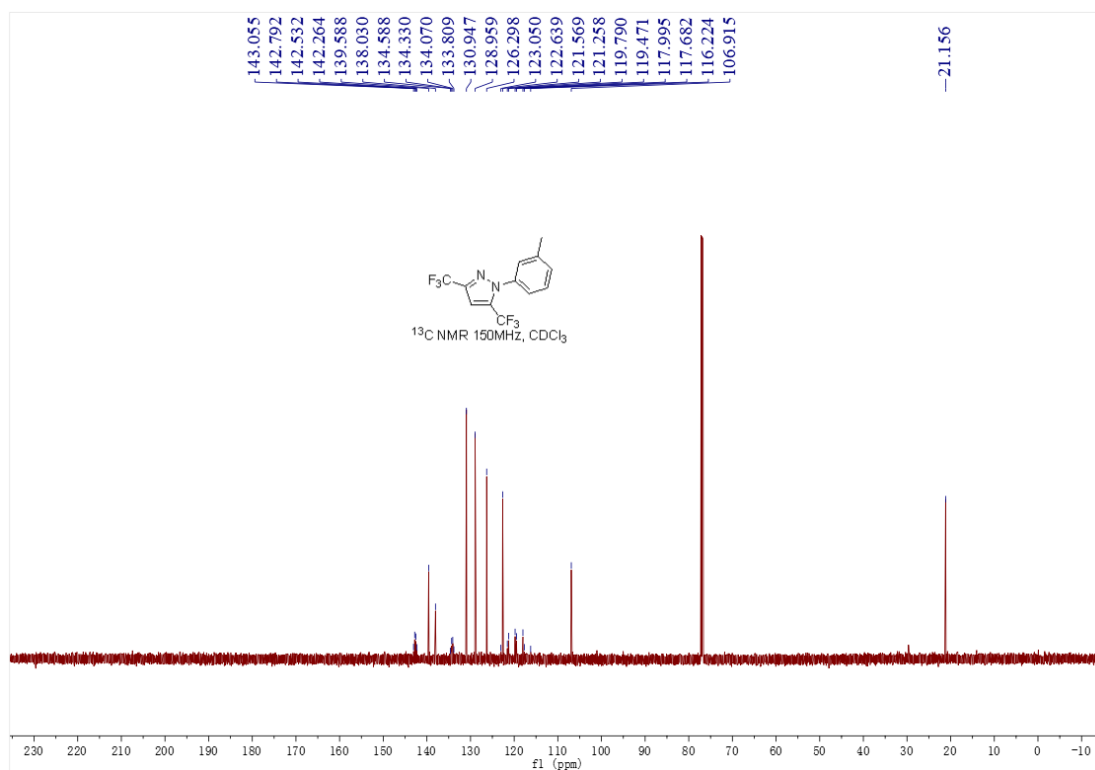

<sup>19</sup>F NMR copy of compound 3c'

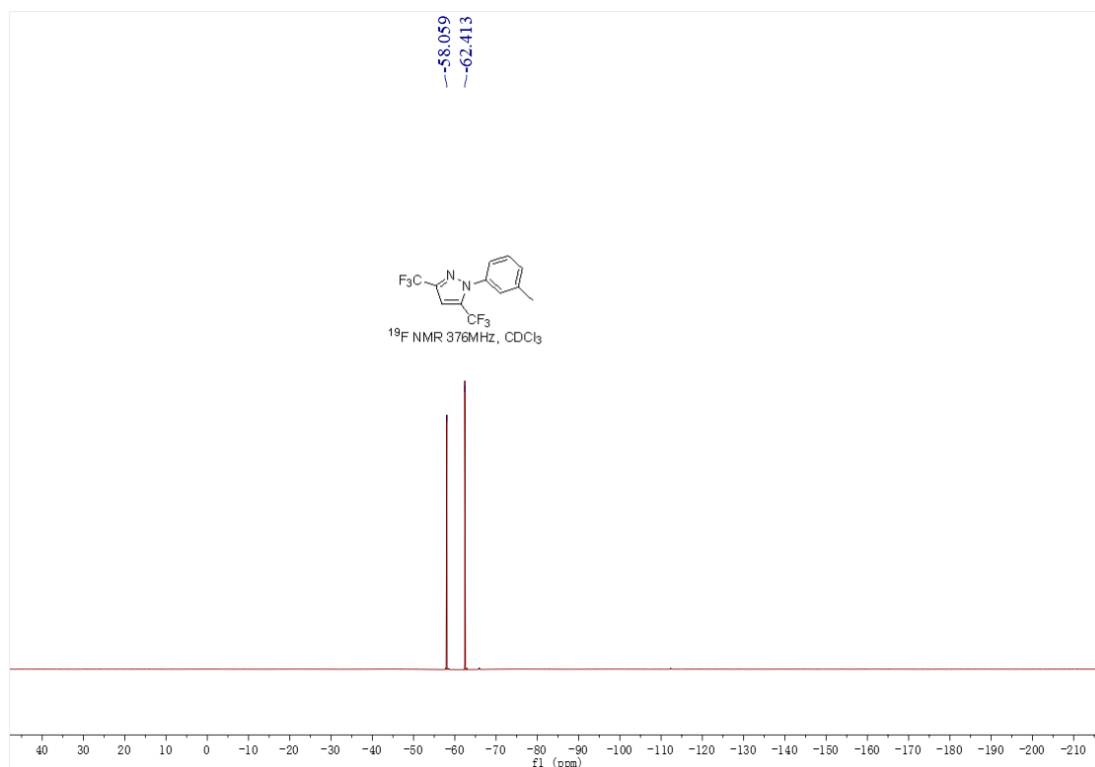

HRMS copy of compound 3c'

### Mass Spectrum SmartFormula Report

|                      |                                              |                   |                   |
|----------------------|----------------------------------------------|-------------------|-------------------|
| <b>Analysis Info</b> |                                              | Acquisition Date  | 2024-2-5 10:35:36 |
| Analysis Name        | D:\Data\user\NWNWU-wangruikang 20240205-34.d | Operator          | Huyue             |
| Method               | tune_low.m                                   | Instrument / Ser# | micrOTOF-Q 20453  |
| Sample Name          | 34                                           |                   |                   |
| Comment              |                                              |                   |                   |

|                              |          |                       |           |                  |           |
|------------------------------|----------|-----------------------|-----------|------------------|-----------|
| <b>Acquisition Parameter</b> |          |                       |           |                  |           |
| Source Type                  | ESI      | Ion Polarity          | Positive  | Set Nebulizer    | 0.4 Bar   |
| Focus                        | Active   | Set Capillary         | 4500 V    | Set Dry Heater   | 180 j°C   |
| Scan Begin                   | 100 m/z  | Set End Plate Offset  | -500 V    | Set Dry Gas      | 4.0 l/min |
| Scan End                     | 1000 m/z | Set Collision Cell RF | 400.0 Vpp | Set Divert Valve | Waste     |

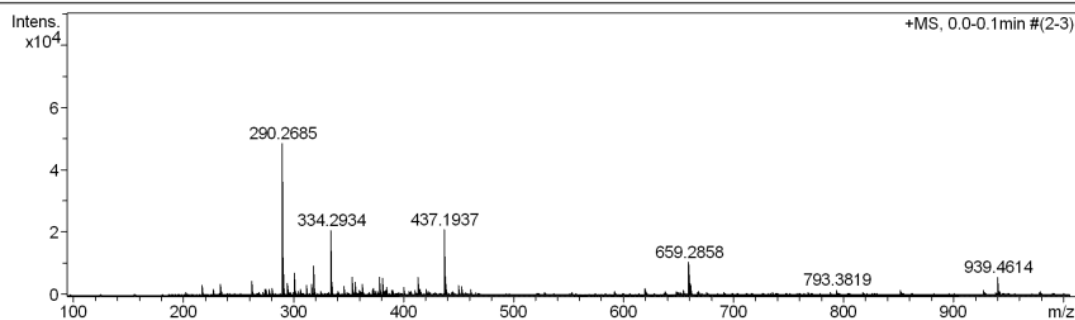

| Meas. m/z | # | Formula          | m/z      | err [ppm] | Me an err [ppm] | rdb | N-Ru le | ej≠ Conf | mSi gma | Std l | Std Me an m/z | Std l Var Nor m | Std m/z Diff | Std Com b Dev |
|-----------|---|------------------|----------|-----------|-----------------|-----|---------|----------|---------|-------|---------------|-----------------|--------------|---------------|
| 295.0656  | 1 | C 12 H 9 F 6 N 2 | 295.0664 | 2.8       | 2.8             | 6.5 | ok      | even     | 79.4    | 137.2 | 0.8           | 68.9            | 0.8          | 842.7         |



Spectrogram copies of compound **3e'**

$^1\text{H}$  NMR copy of compound **3e'**

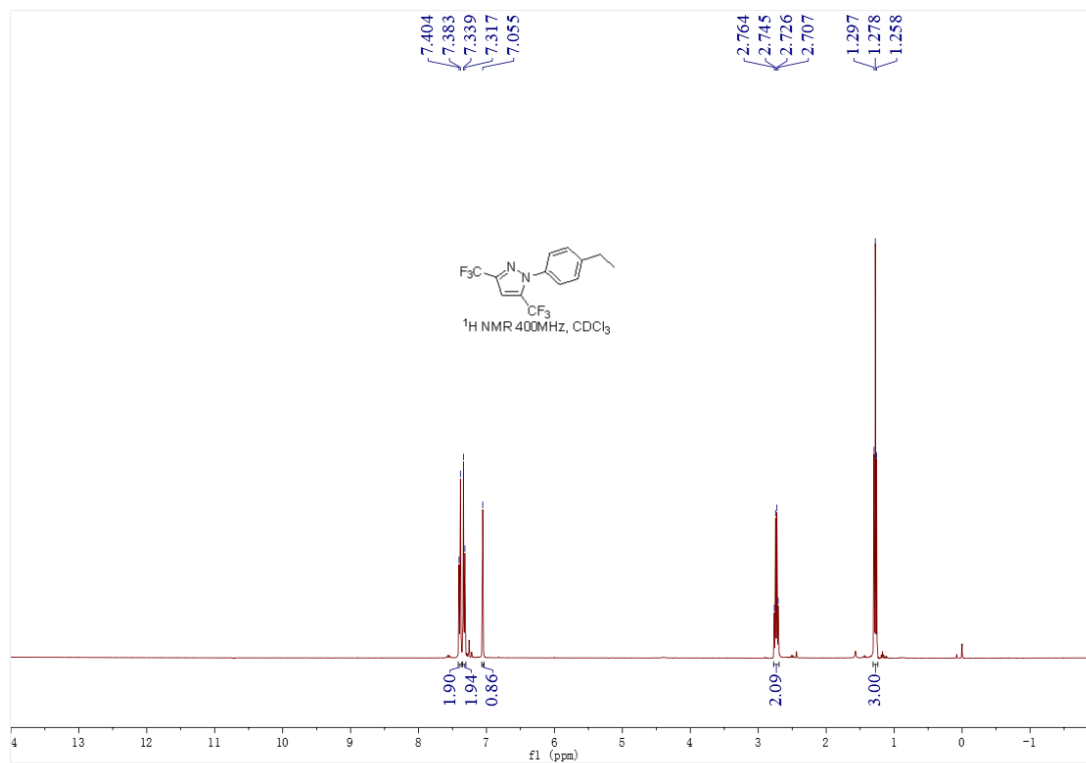

$^{13}\text{C}$  NMR copy of compound **3e'**

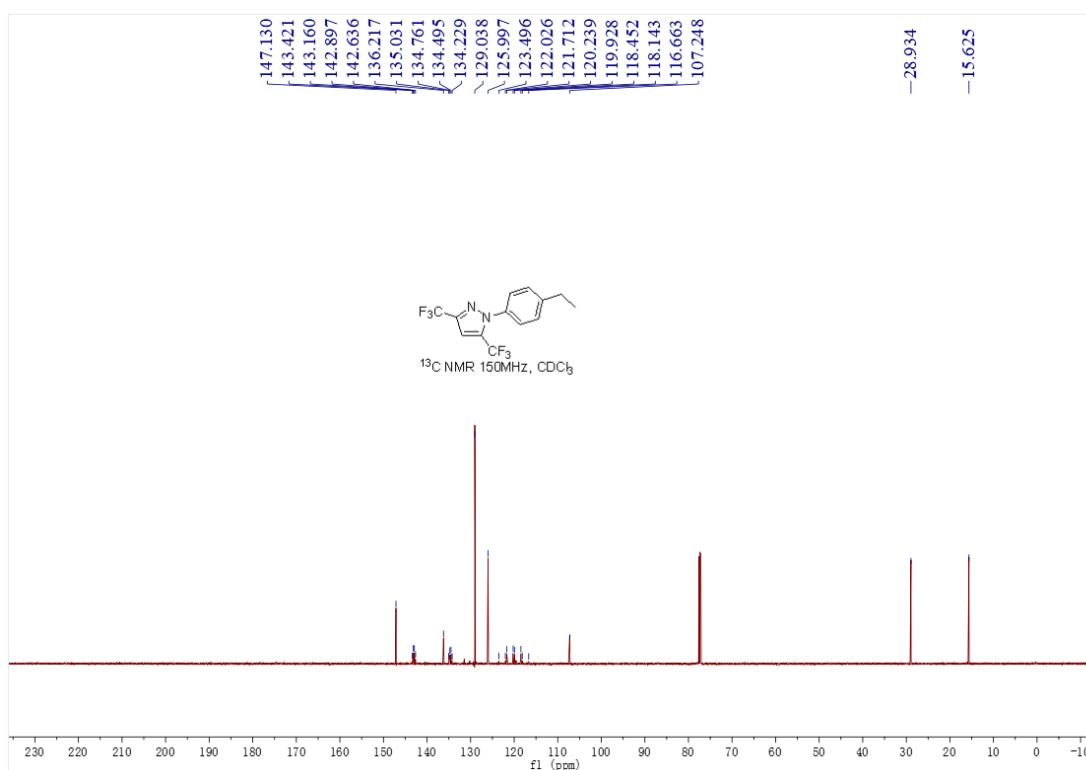

<sup>19</sup>F NMR copy of compound **3e'**

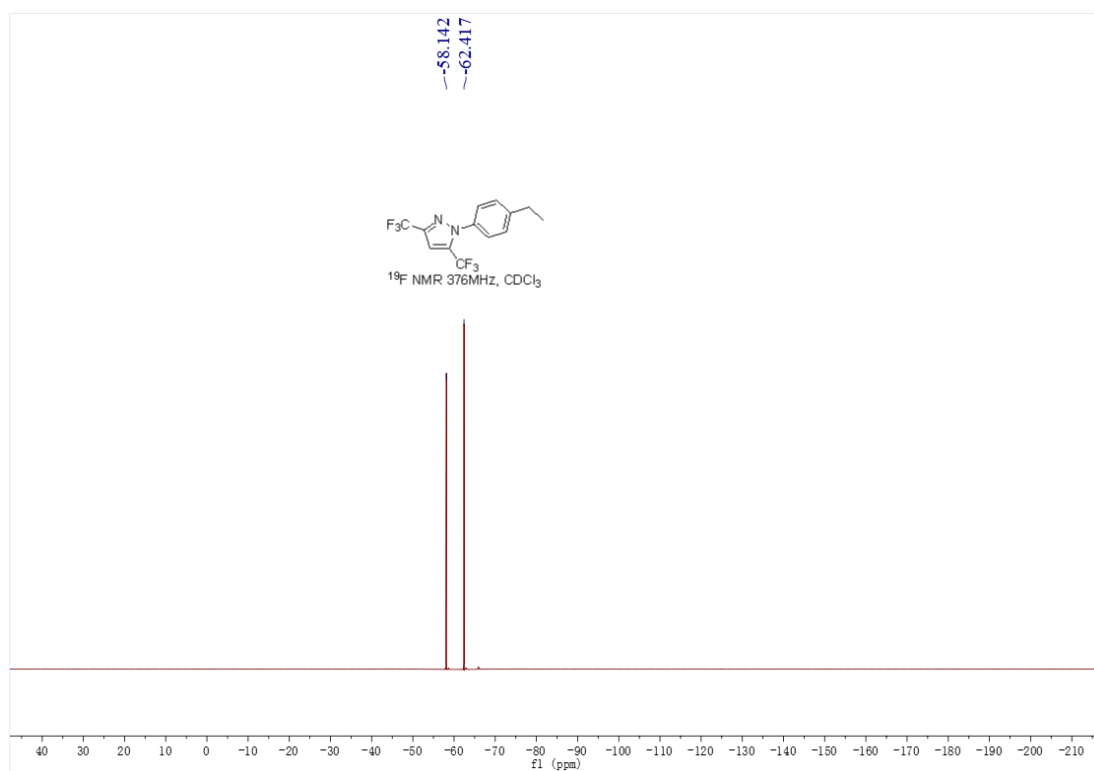

HRMS copy of compound 3e'

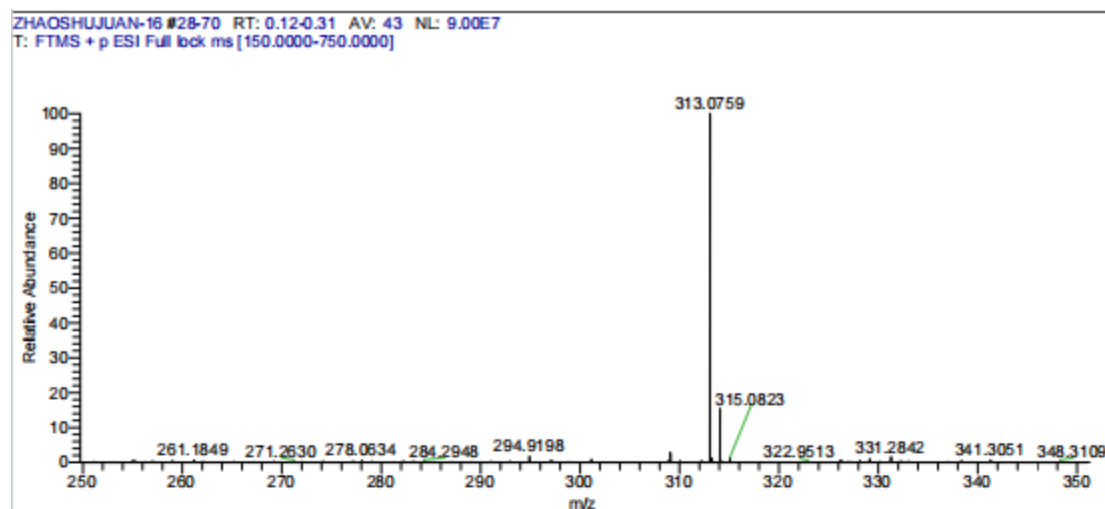

ZHAOSHUJUAN-16#28-70 RT: 0.12-0.31 AV: 43  
T: FTMS + p ESI Full lock ms [150.0000-750.0000]  
m/z = 307.5329-310.0554

| m/z      | Intensity | Relative | Theo. Mass | Delta (ppm) | Composition                                                   |
|----------|-----------|----------|------------|-------------|---------------------------------------------------------------|
| 308.8992 | 323639.2  | 13.02    | 309.0821   | -182.89     | C <sub>13</sub> H <sub>11</sub> N <sub>2</sub> F <sub>6</sub> |
| 309.0822 | 2484776.0 | 100.00   | 309.0821   | 0.12        | C <sub>13</sub> H <sub>11</sub> N <sub>2</sub> F <sub>6</sub> |
| 309.1700 | 40907.3   | 1.65     | 309.0821   | 87.94       | C <sub>13</sub> H <sub>11</sub> N <sub>2</sub> F <sub>6</sub> |
| 309.2053 | 50479.8   | 2.03     | 309.0821   | 123.19      | C <sub>13</sub> H <sub>11</sub> N <sub>2</sub> F <sub>6</sub> |
| 309.2794 | 31769.7   | 1.28     | 309.0821   | 197.28      | C <sub>13</sub> H <sub>11</sub> N <sub>2</sub> F <sub>6</sub> |

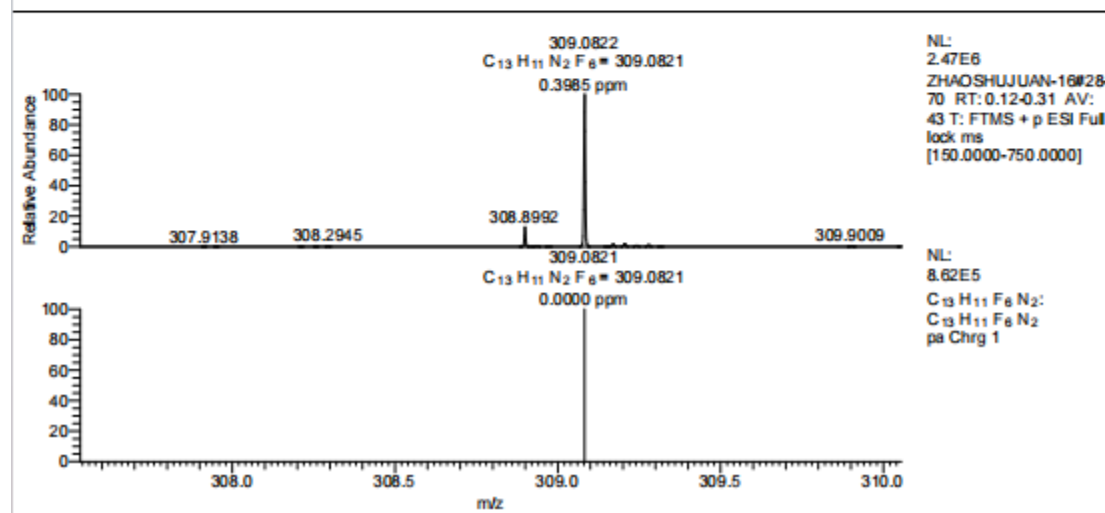

### Spectrogram copies of compound **3f'**

#### <sup>1</sup>H NMR copy of compound **3f'**

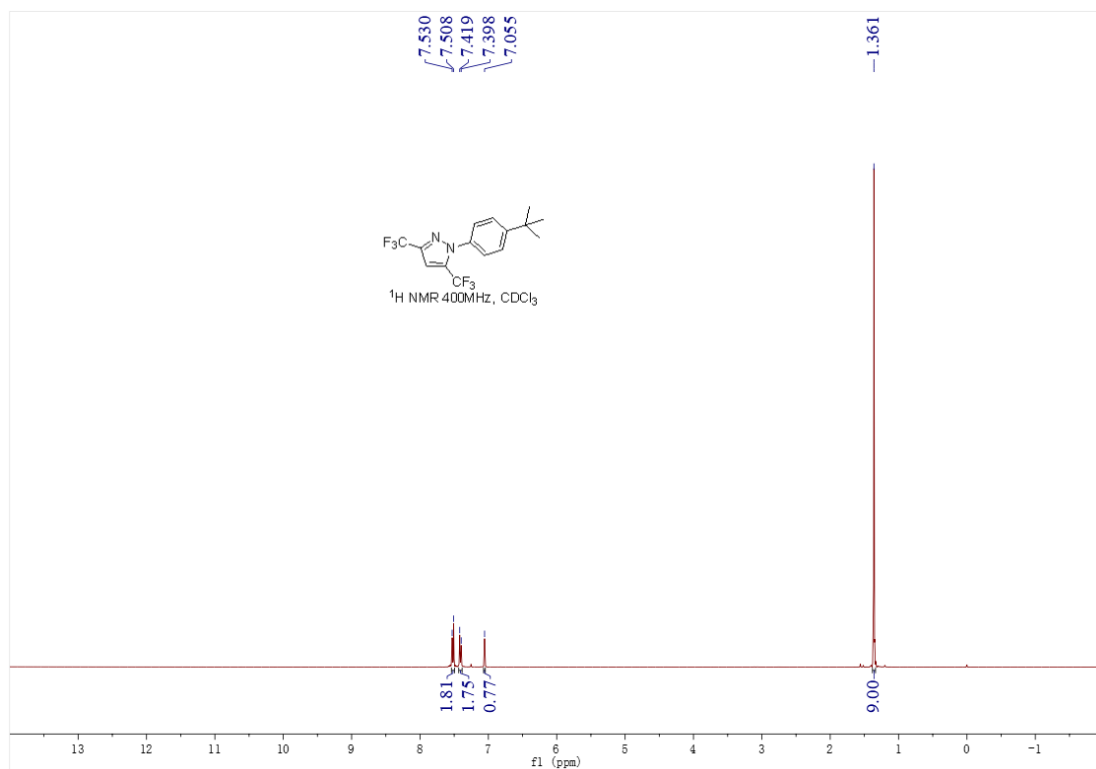

#### <sup>13</sup>C NMR copy of compound **3f'**

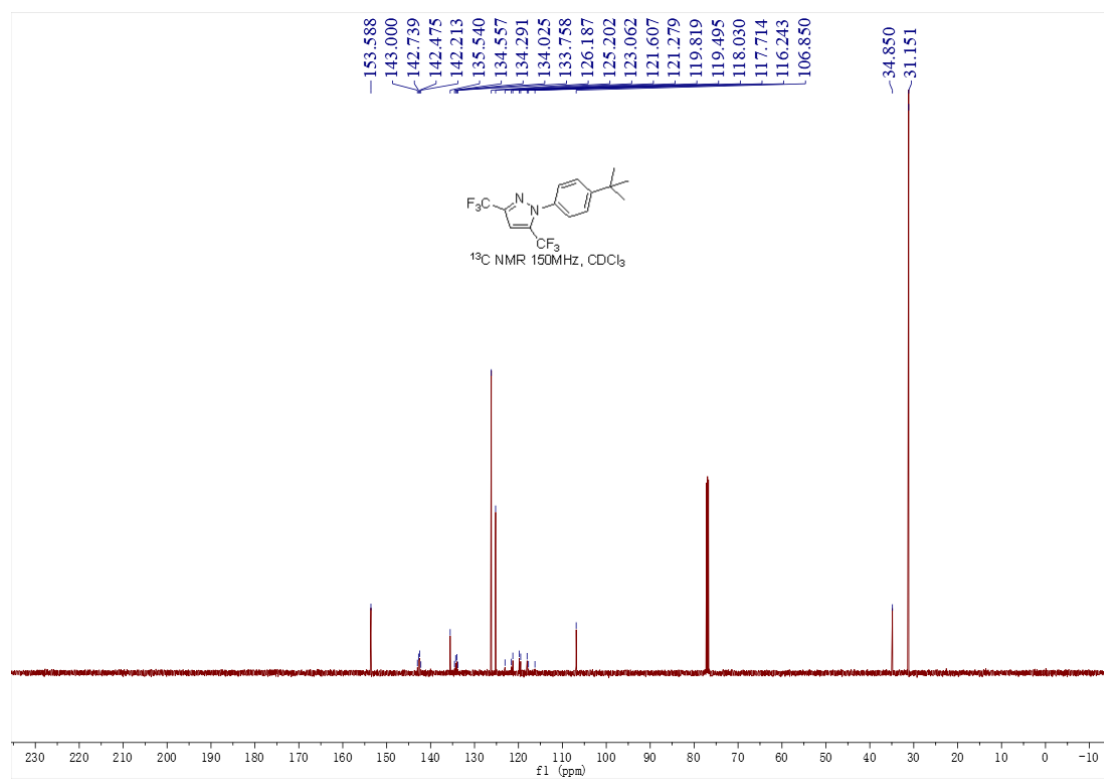

<sup>19</sup>F NMR copy of compound **3f'**

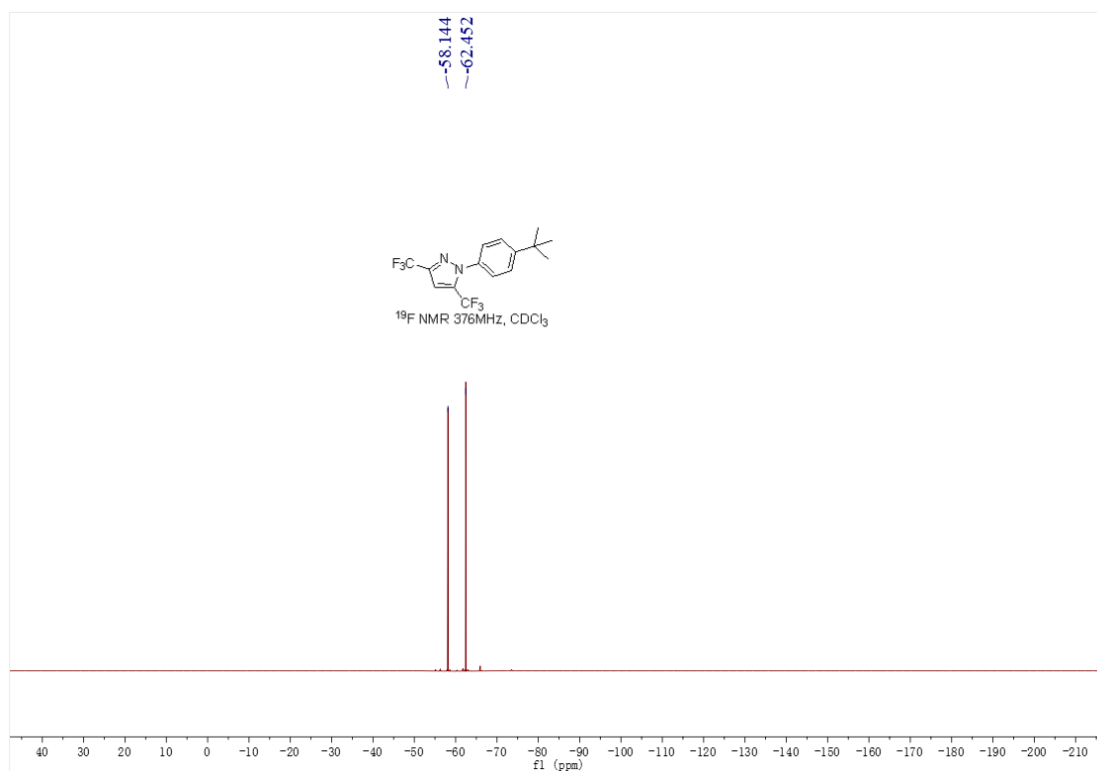

# HRMS copy of compound 3f'

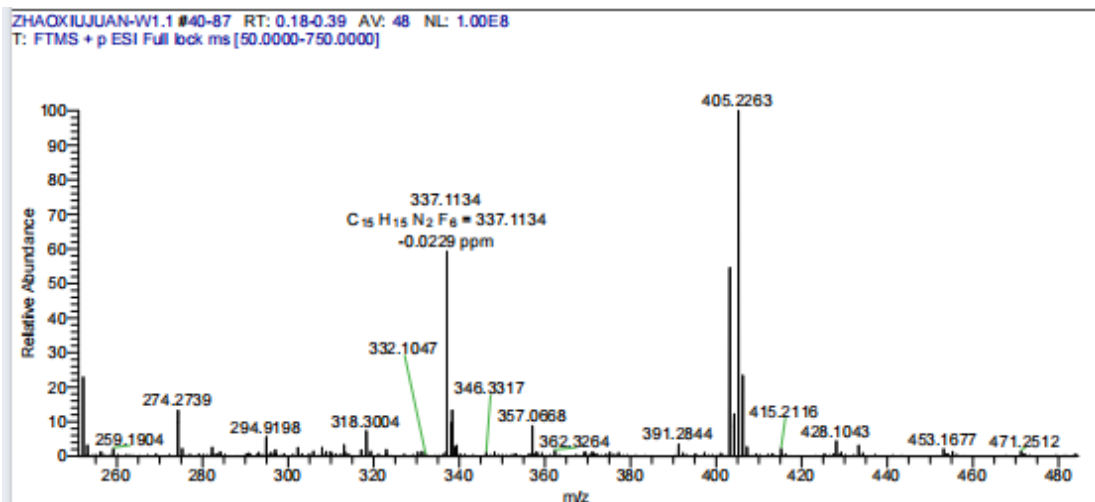

ZHAOXIUJUAN-W1.1#40-87 RT: 0.18-0.39 AV: 48  
T: FTMS + p ESI Full lock ms [50.0000-750.0000]  
m/z= 251.0216-484.2023

| m/z      | Intensity   | Relative | Theo. Mass | Delta (ppm) | Composition                                                   |
|----------|-------------|----------|------------|-------------|---------------------------------------------------------------|
| 252.1230 | 22941646.0  | 22.66    |            |             |                                                               |
| 337.1134 | 61712468.0  | 60.94    | 337.1134   | -0.01       | C <sub>15</sub> H <sub>15</sub> N <sub>2</sub> F <sub>6</sub> |
| 403.2106 | 55402504.0  | 54.71    |            |             |                                                               |
| 405.2263 | 101265192.0 | 100.00   |            |             |                                                               |
| 406.2299 | 23837218.0  | 23.54    |            |             |                                                               |

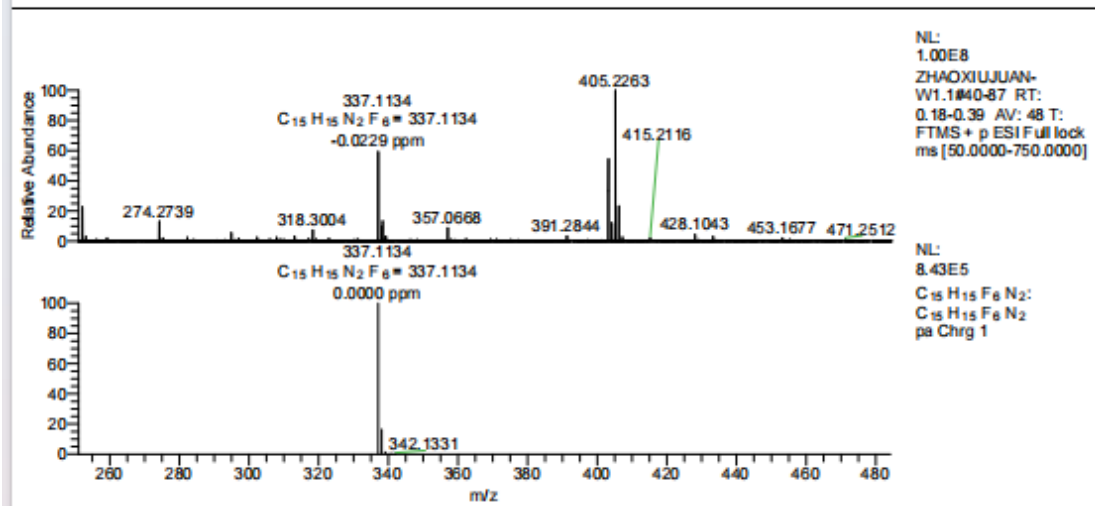

Spectrogram copies of compound **3g'**

$^1\text{H}$  NMR copy of compound **3g'**

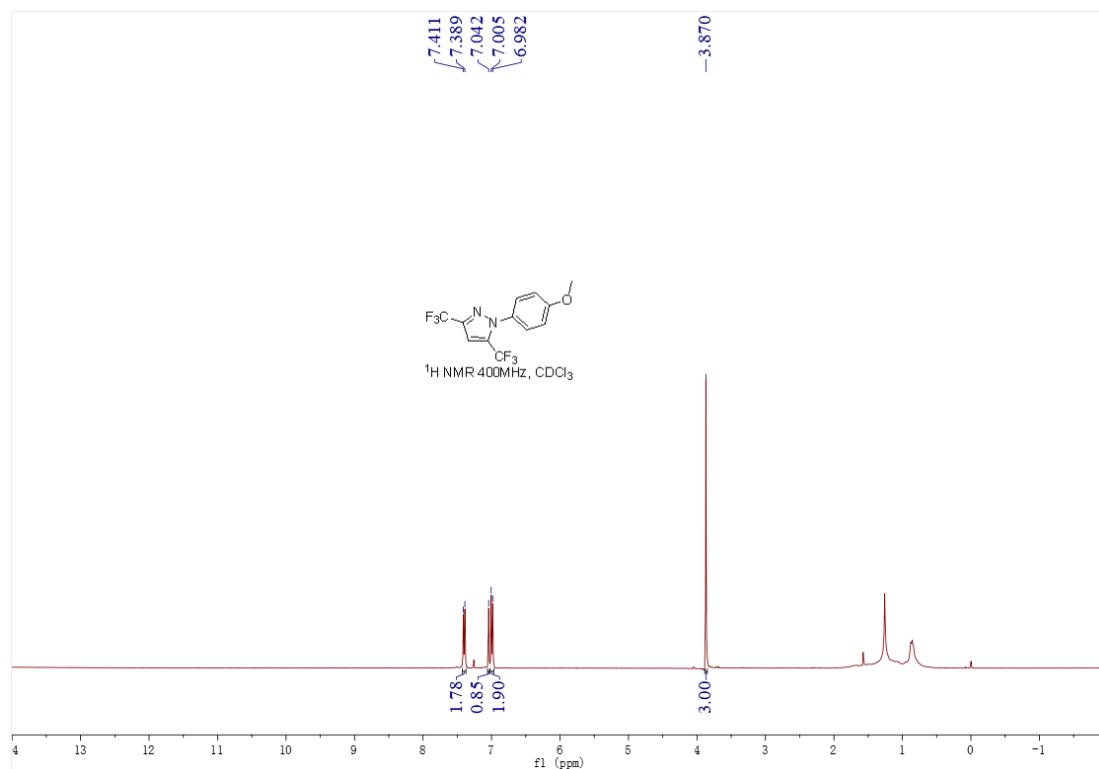

$^{13}\text{C}$  NMR copy of compound **3g'**

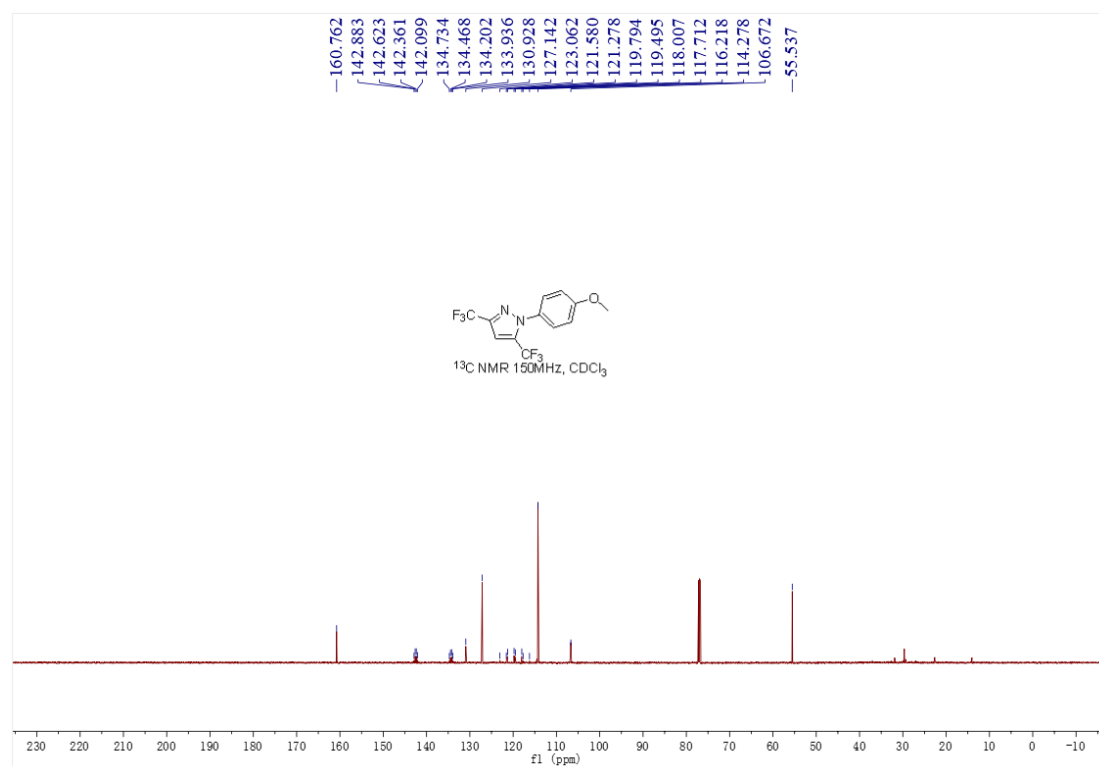

<sup>19</sup>F NMR copy of compound **3g'**

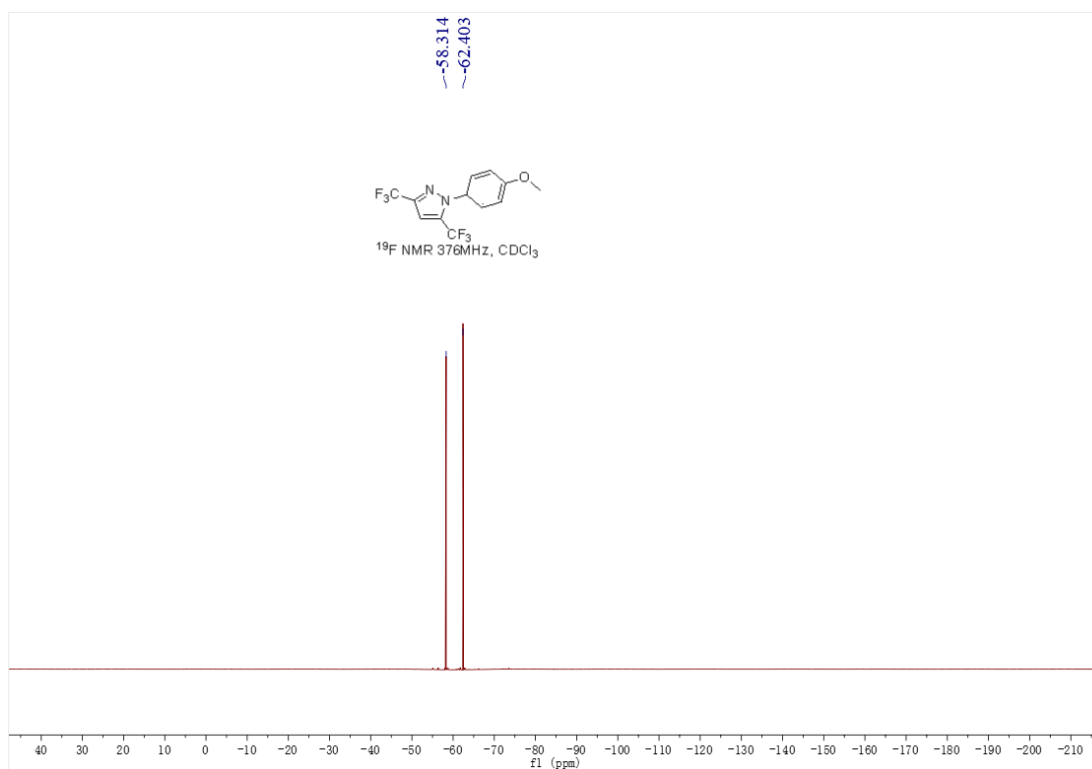



### Spectrogram copies of compound **3h'**

#### <sup>1</sup>H NMR copy of compound **3h'**

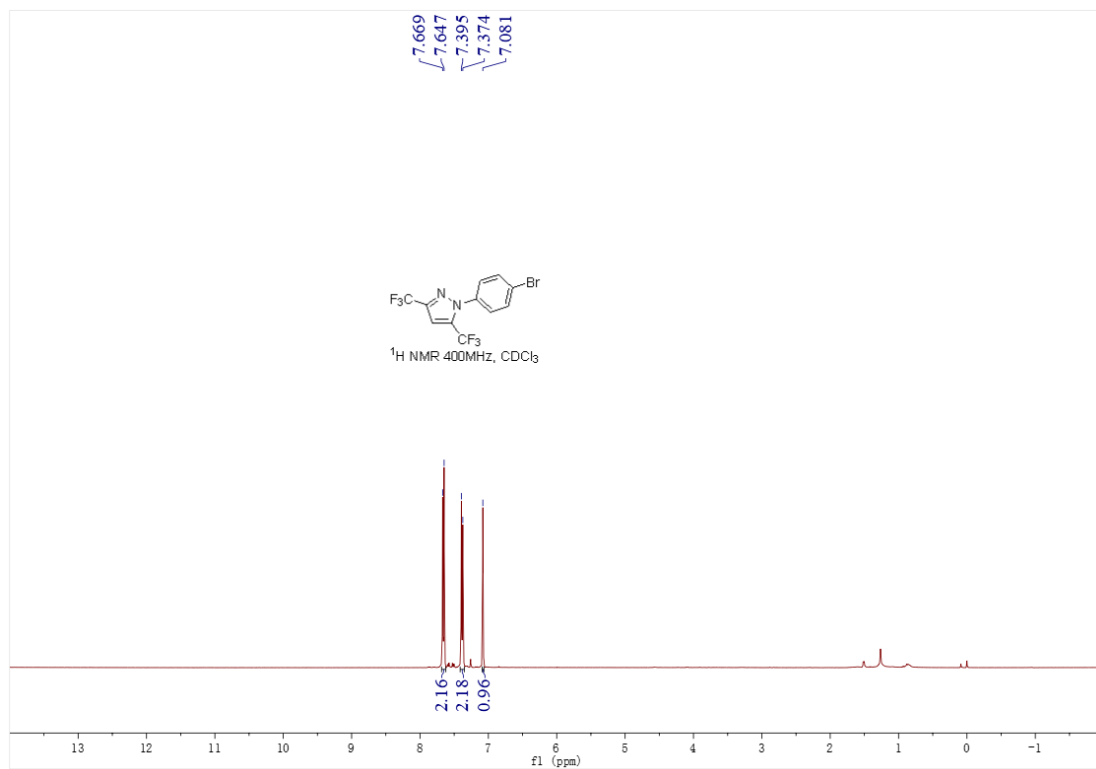

#### <sup>13</sup>C NMR copy of compound **3h'**

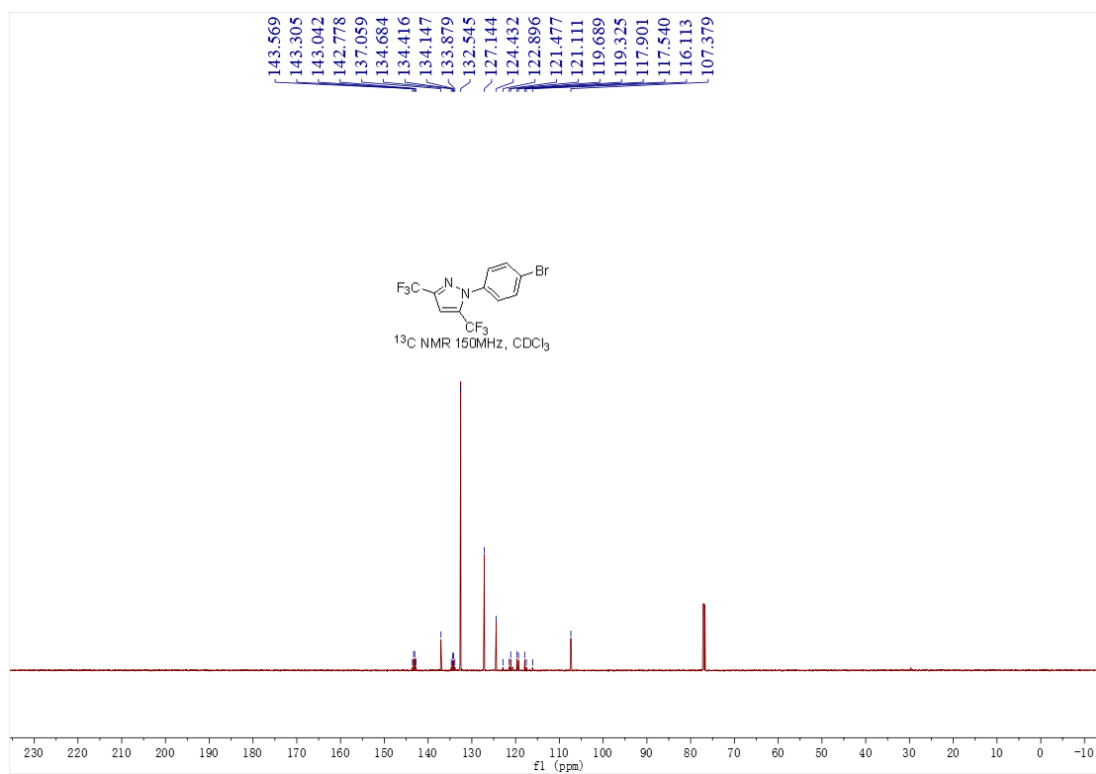

<sup>19</sup>F NMR copy of compound **3h'**

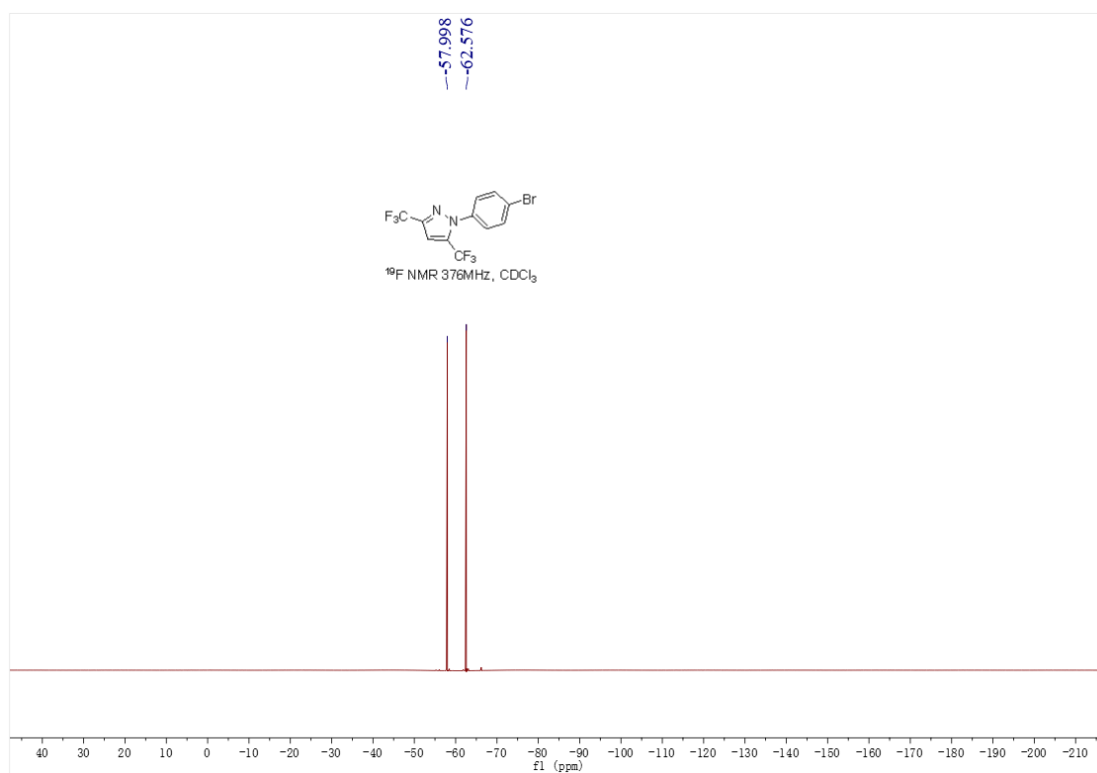

Spectrogram copies of compound **3j'**

$^1\text{H}$  NMR copy of compound **3j'**

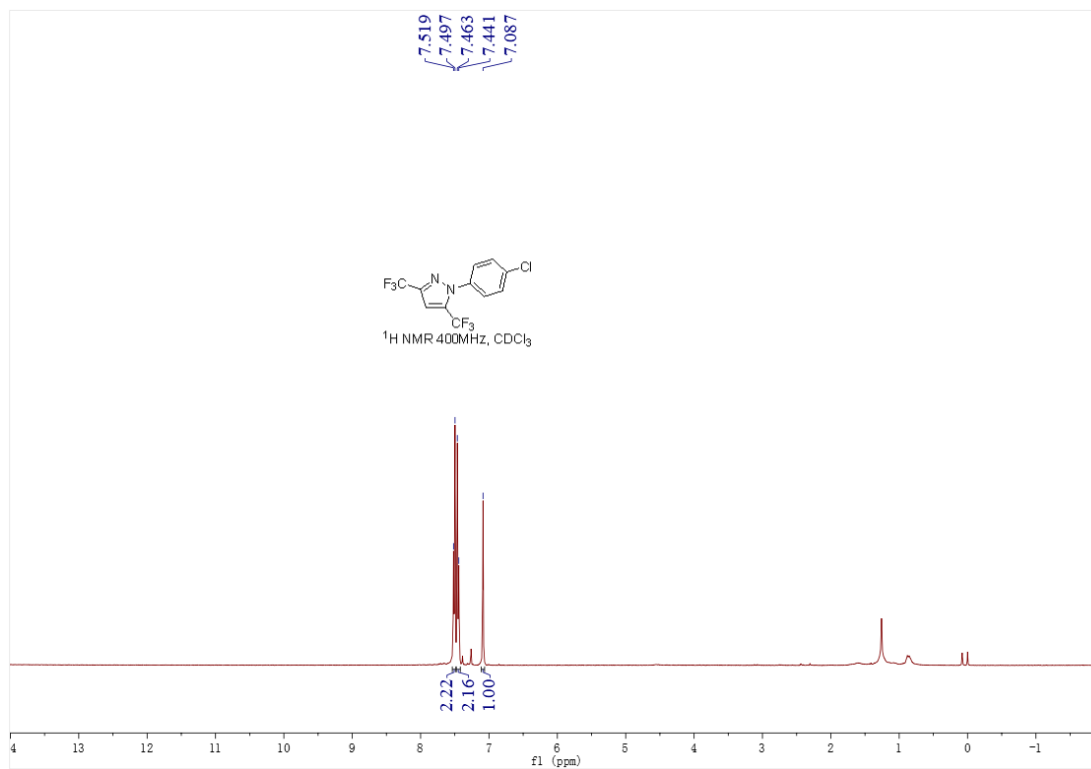

$^{13}\text{C}$  NMR copy of compound **3j'**

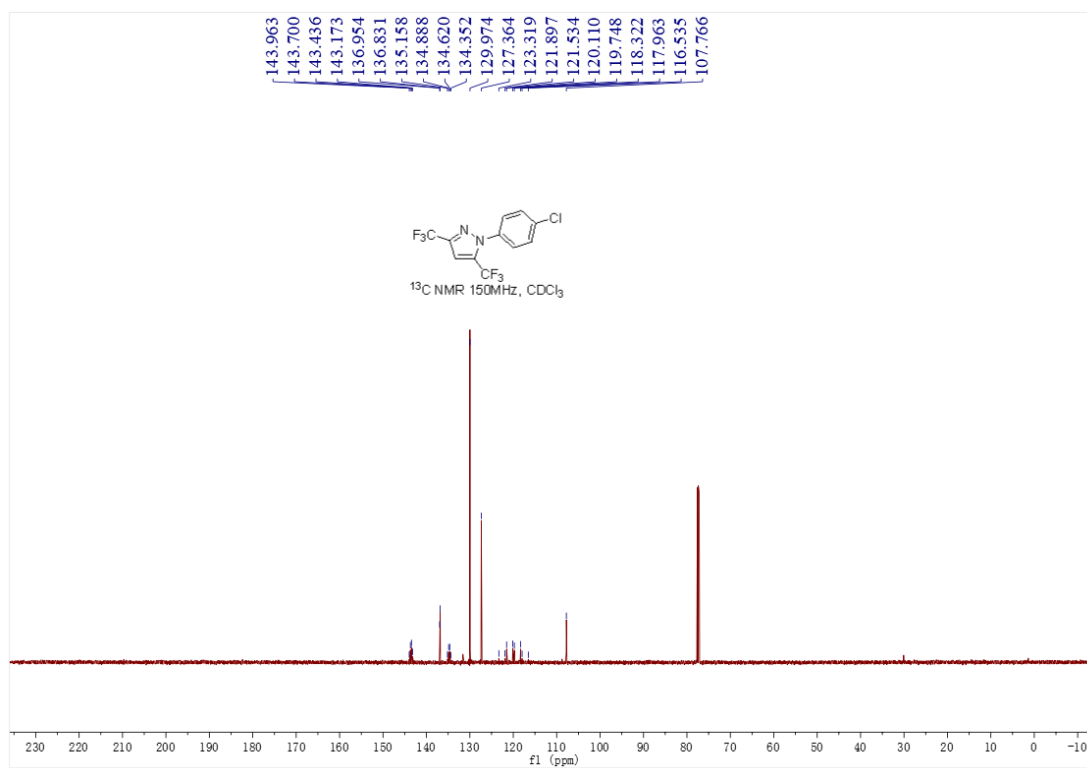

<sup>19</sup>F NMR copy of compound **3j'**

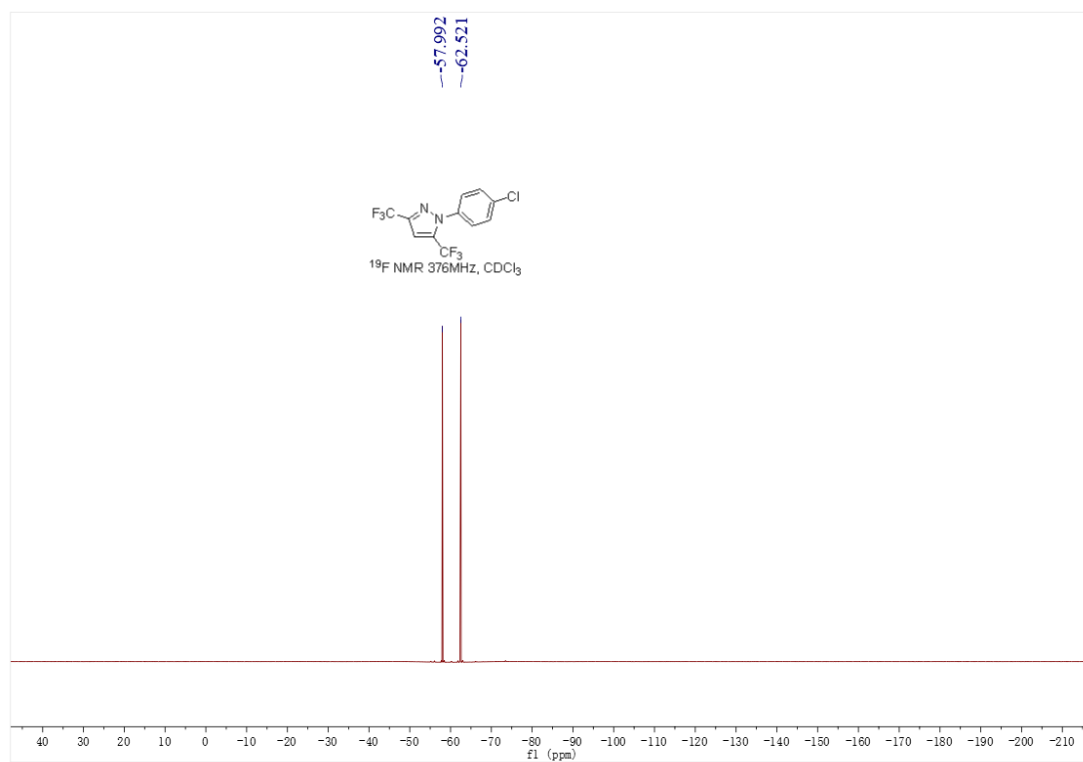

HRMS copy of compound 3j'

ZHAOXIUJUAN-W2.2#44-92 RT: 0.20-0.41 AV: 49 NL: 3.48E7  
T: FTMS + p ESI Full ms [50.0000-750.0000]

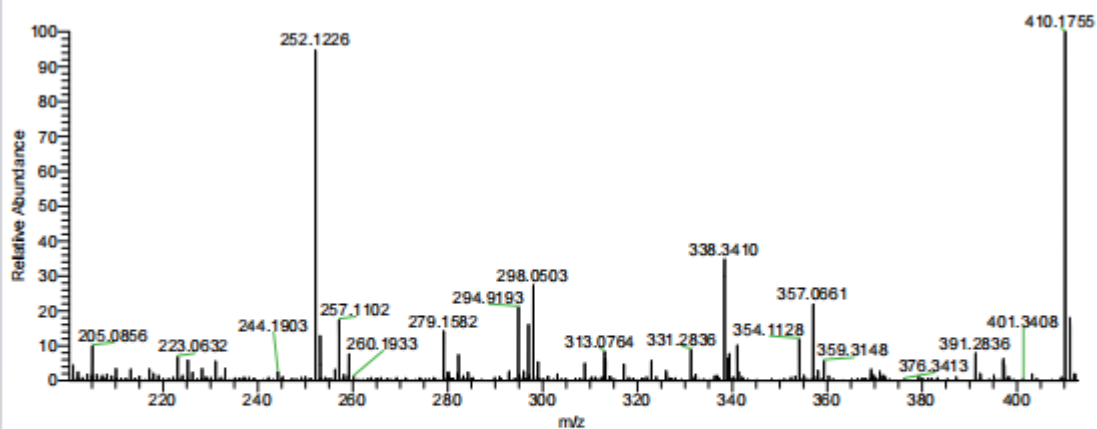

ZHAOXIUJUAN-W2.2#44-92 RT: 0.20-0.41 AV: 49  
T: FTMS + p ESI Full ms [50.0000-750.0000]  
m/z = 314.6966-315.3515

| m/z      | Intensity | Relative | Theo. Mass | Delta (ppm) | Composition                                                    |
|----------|-----------|----------|------------|-------------|----------------------------------------------------------------|
| 314.9593 | 18781.8   | 16.57    | 315.0118   | -52.56      | C <sub>11</sub> H <sub>6</sub> N <sub>2</sub> ClF <sub>6</sub> |
| 315.0126 | 113321.9  | 100.00   | 315.0118   | 0.77        | C <sub>11</sub> H <sub>6</sub> N <sub>2</sub> ClF <sub>6</sub> |
| 315.2528 | 4064.1    | 3.59     | 315.0118   | 240.95      | C <sub>11</sub> H <sub>6</sub> N <sub>2</sub> ClF <sub>6</sub> |
| 315.2680 | 87073.8   | 76.84    | 315.0118   | 256.16      | C <sub>11</sub> H <sub>6</sub> N <sub>2</sub> ClF <sub>6</sub> |
| 315.2803 | 3831.5    | 3.38     | 315.0118   | 268.48      | C <sub>11</sub> H <sub>6</sub> N <sub>2</sub> ClF <sub>6</sub> |

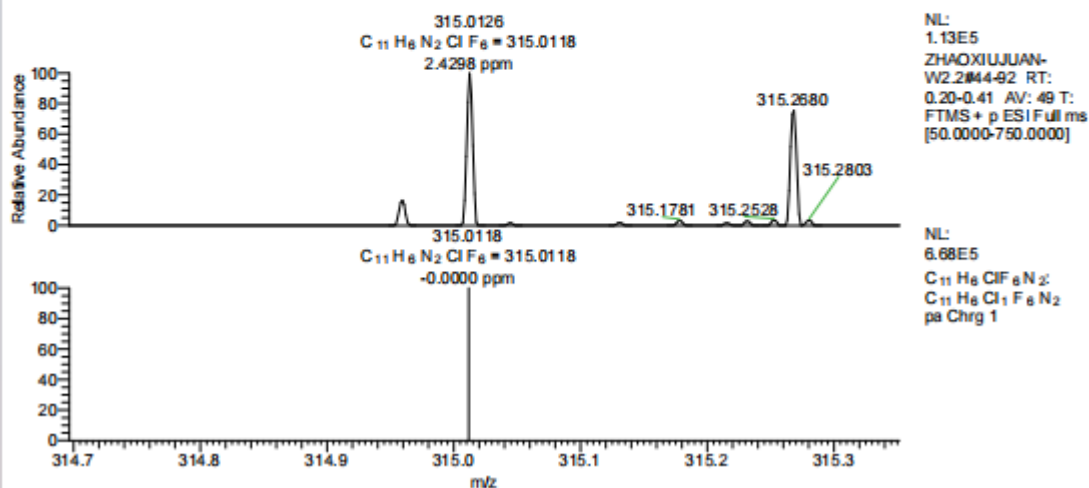

Spectrogram copies of compound **3k'**

<sup>1</sup>H NMR copy of compound **3k'**

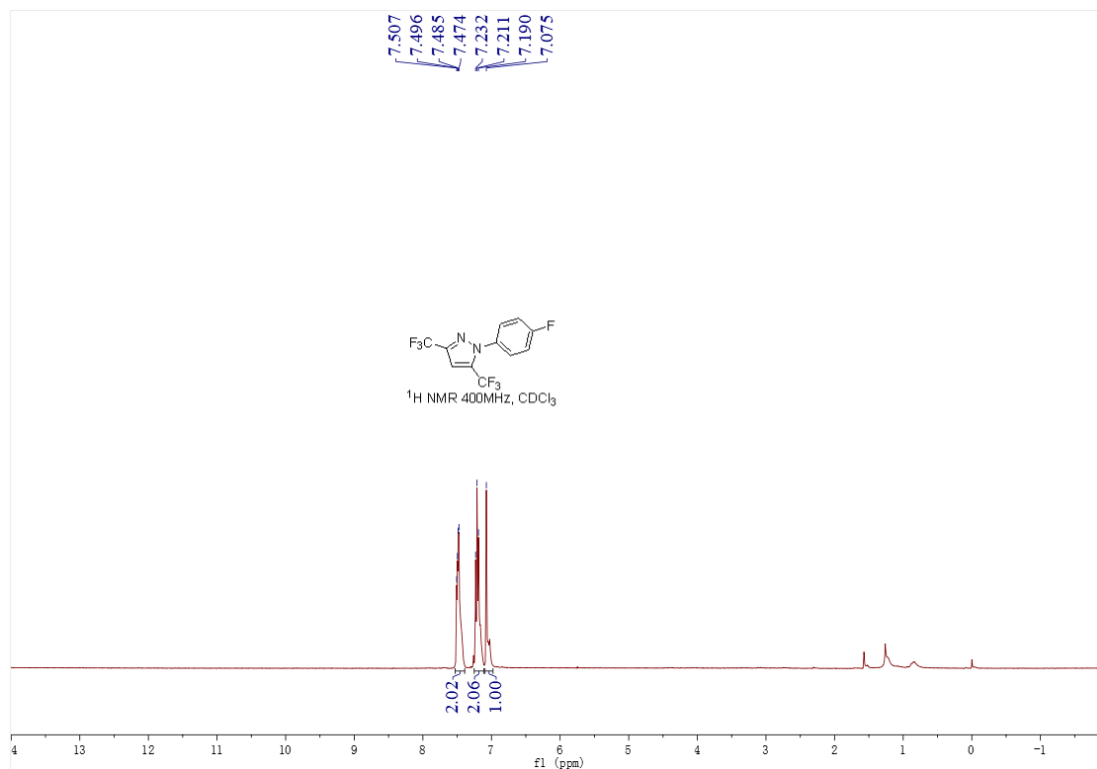

<sup>13</sup>C NMR copy of compound **3k'**

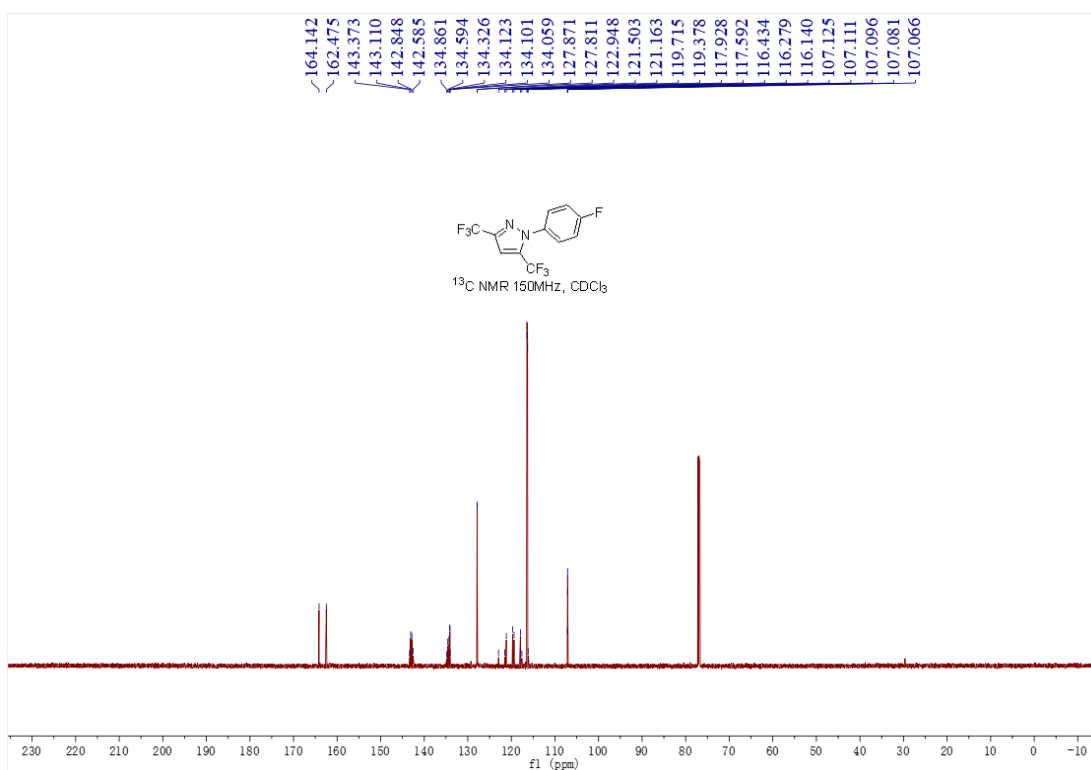

<sup>19</sup>F NMR copy of compound **3k'**

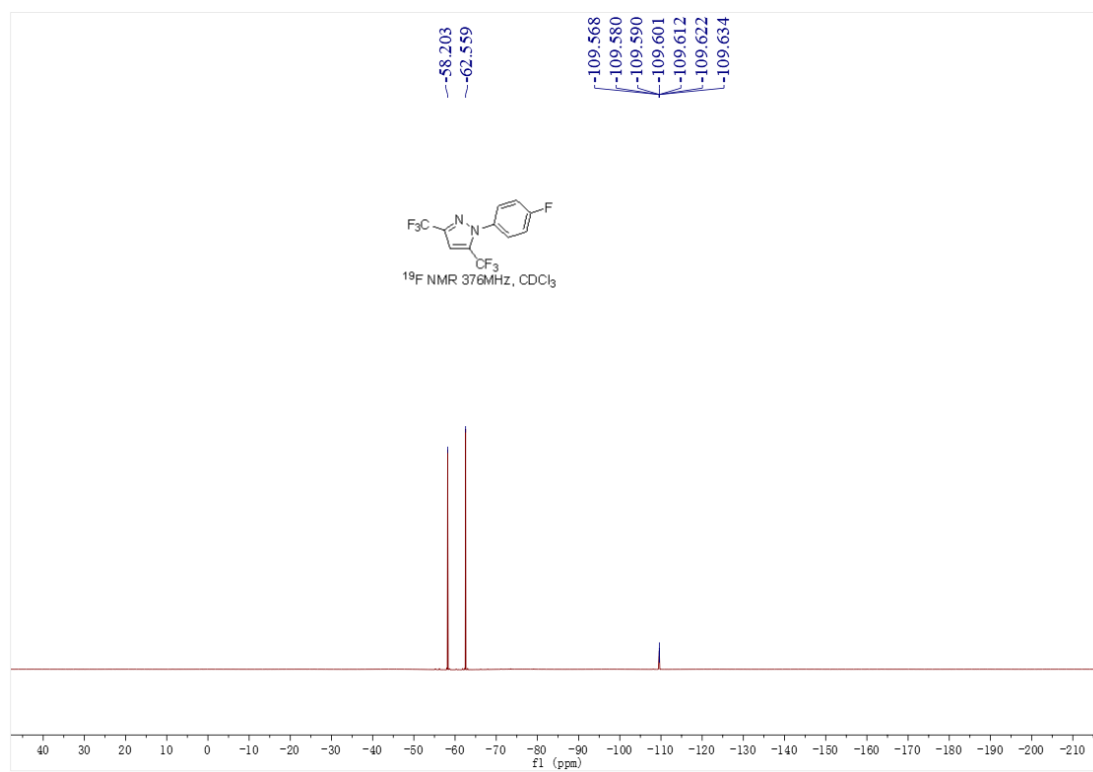

HRMS copy of compound 3k'

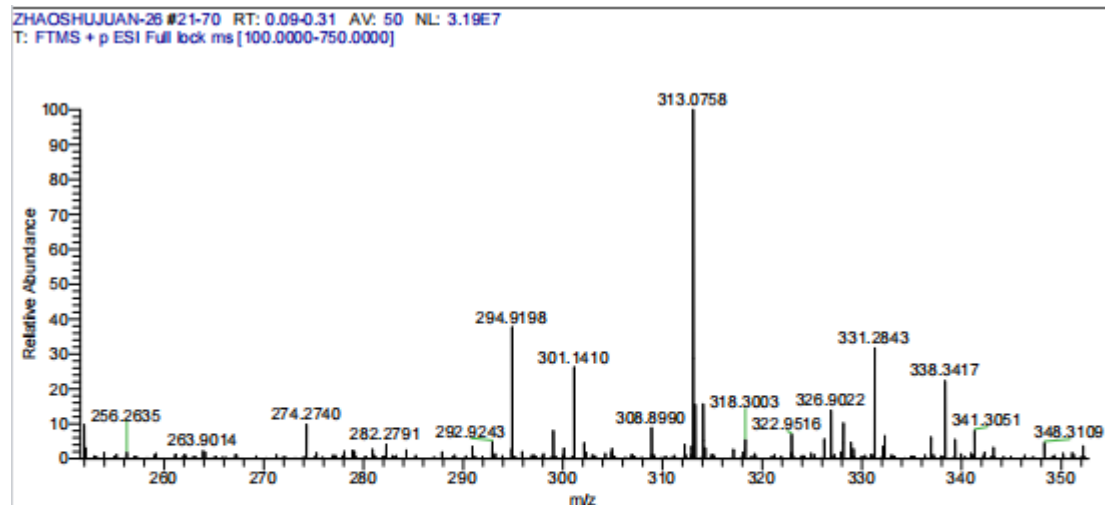

ZHAOSHUJUAN-26#21-70 RT: 0.09-0.31 AV: 50  
T: FTMS + p ESI Full lock ms [100.0000-750.0000]  
m/z = 297.6086-300.6112

| m/z      | Intensity | Relative | Theo. Mass | Delta (ppm) | Composition                                                  |
|----------|-----------|----------|------------|-------------|--------------------------------------------------------------|
| 297.9278 | 230327.2  | 9.00     |            |             |                                                              |
| 298.0508 | 448310.4  | 17.52    |            |             |                                                              |
| 299.0414 | 2558502.0 | 100.00   | 299.0414   | -0.01       | C <sub>11</sub> H <sub>6</sub> N <sub>2</sub> F <sub>7</sub> |
| 300.0448 | 309293.0  | 12.09    |            |             |                                                              |
| 300.1053 | 976387.5  | 38.16    |            |             |                                                              |

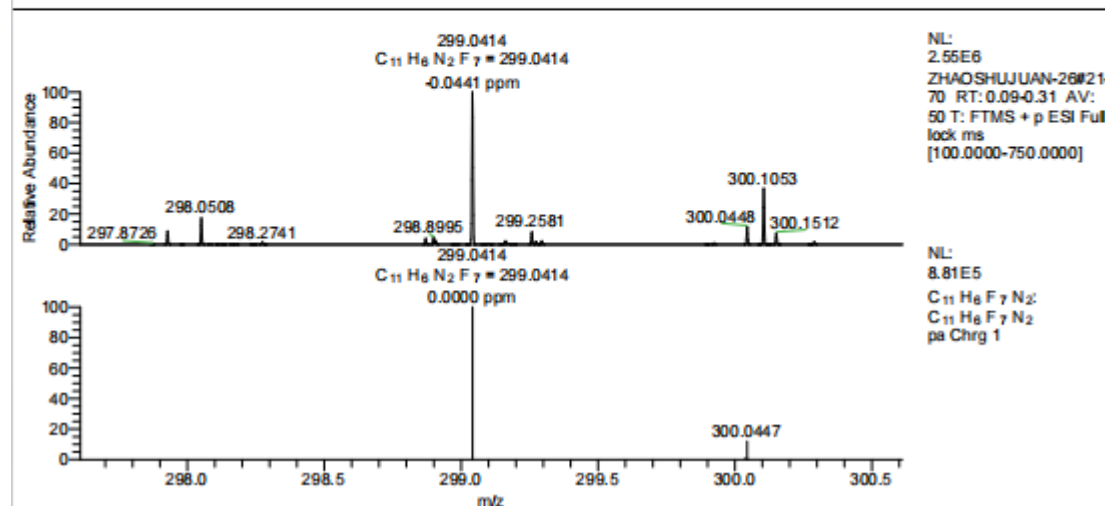



# Spectrogram copies of compound **4a**

## <sup>1</sup>H NMR copy of compound **4a**

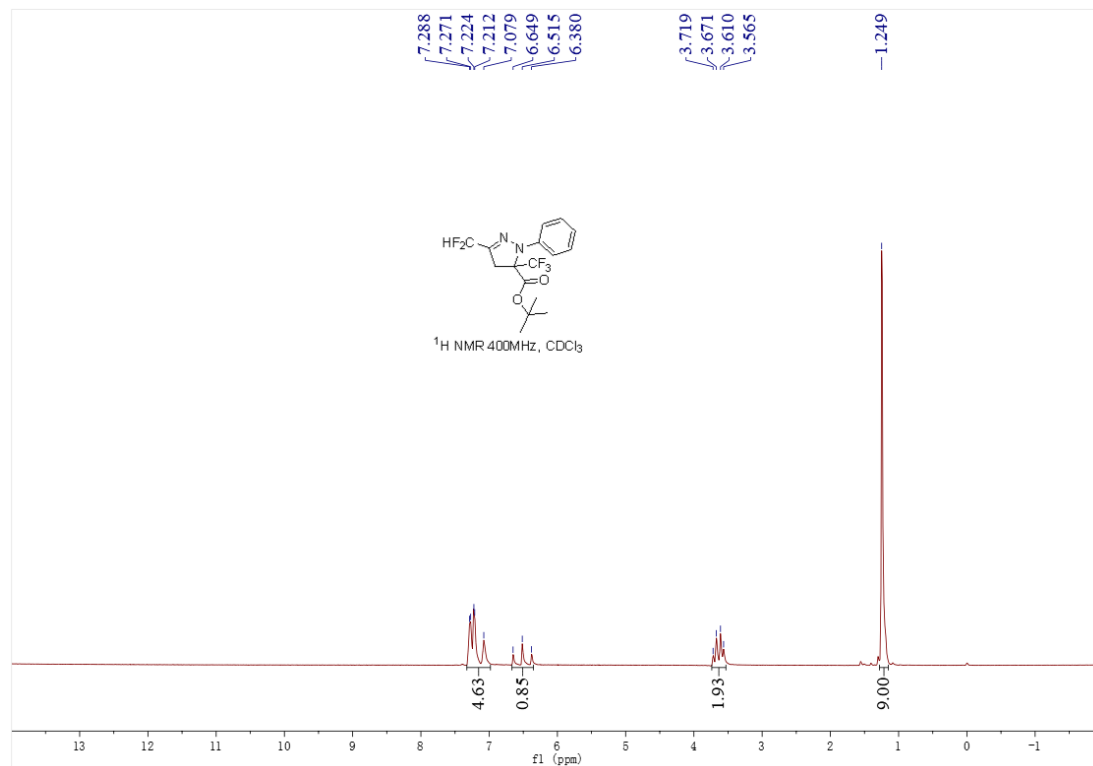

## <sup>13</sup>C NMR copy of compound **4a**

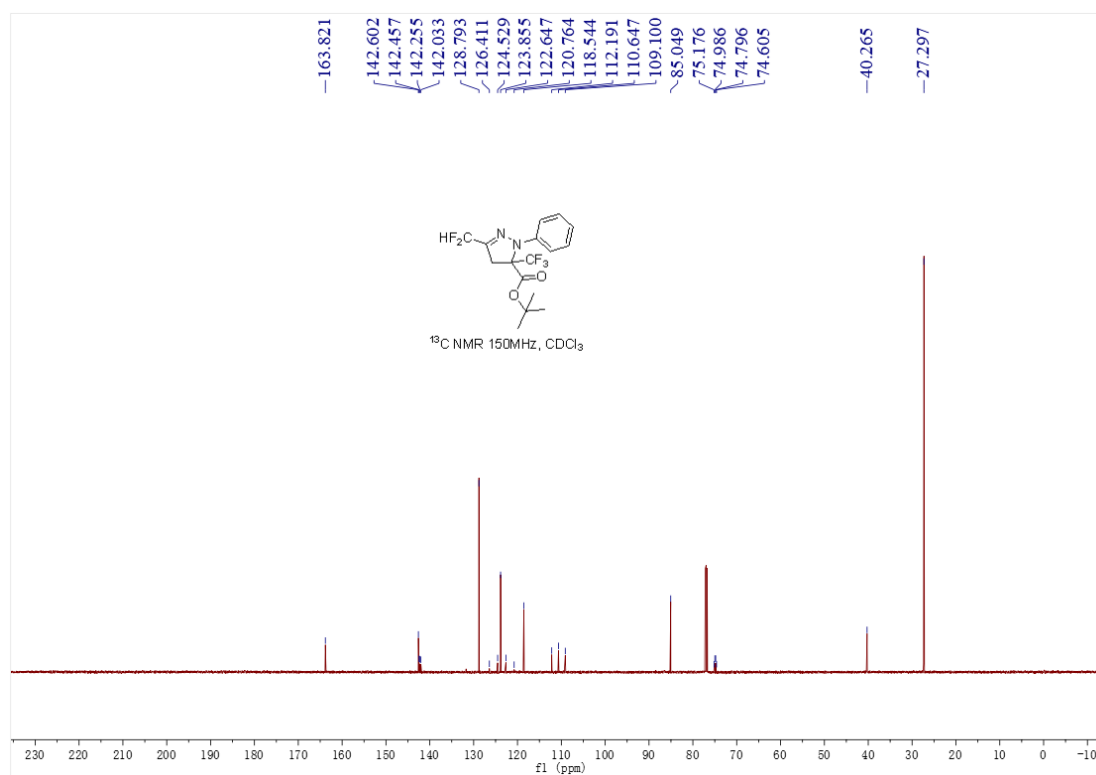

<sup>19</sup>F NMR copy of compound 4a

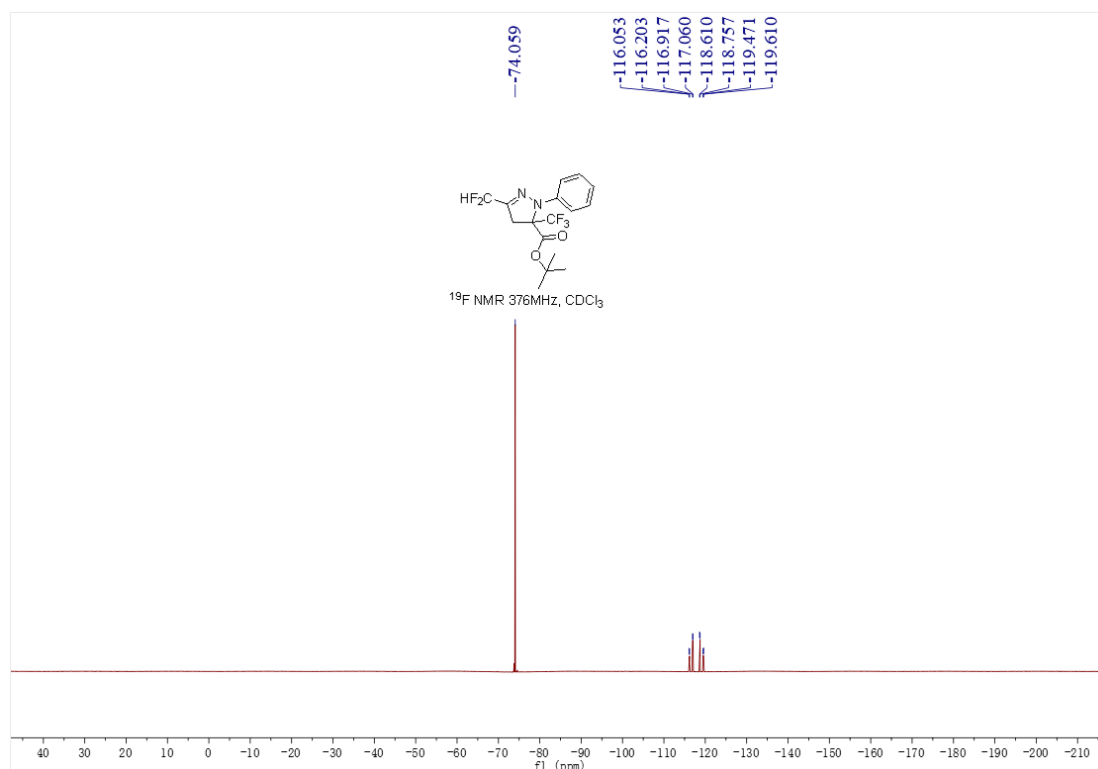

HRMS copy of compound 4a

Mass Spectrum SmartFormula Report

Analysis Info

Analysis Name D:\Data\user\NWNW-wangruikang 20240205-11.d  
 Method tune\_low.m  
 Sample Name 11  
 Comment

Acquisition Date 2024-2-5 9:58:12  
 Operator Huyue  
 Instrument / Ser# micrOTOF-Q 20453

Acquisition Parameter

|             |          |                       |           |                  |           |
|-------------|----------|-----------------------|-----------|------------------|-----------|
| Source Type | ESI      | Ion Polarity          | Positive  | Set Nebulizer    | 0.4 Bar   |
| Focus       | Active   | Set Capillary         | 4500 V    | Set Dry Heater   | 180 j°C   |
| Scan Begin  | 100 m/z  | Set End Plate Offset  | -500 V    | Set Dry Gas      | 4.0 l/min |
| Scan End    | 1000 m/z | Set Collision Cell RF | 300.0 Vpp | Set Divert Valve | Waste     |

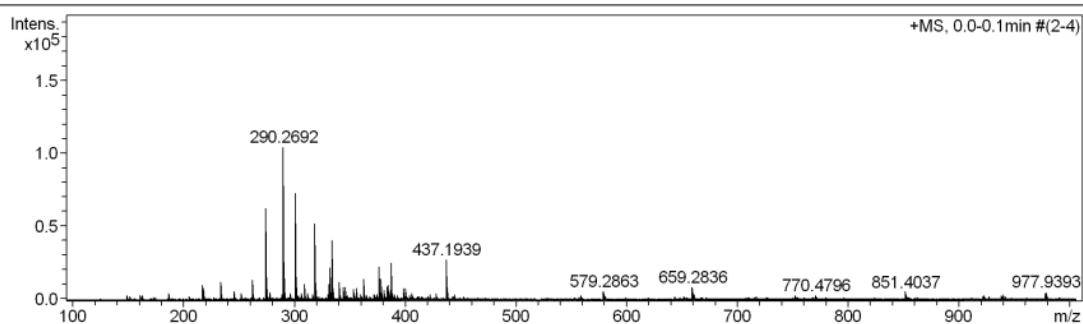

| Meas. #  | Formula                                                                          | m/z      | err [ppm] | Me an err [ppm] | rdb | N-R | ej# Conf | mSi gm a | Std l | Std d Me an m/z | Std Var m/ m | Std l Nor m | Std d z Dif f | Std Com b Dev |
|----------|----------------------------------------------------------------------------------|----------|-----------|-----------------|-----|-----|----------|----------|-------|-----------------|--------------|-------------|---------------|---------------|
| 387.1093 | 1 C <sub>16</sub> H <sub>17</sub> F <sub>5</sub> N <sub>2</sub> NaO <sub>2</sub> | 387.1102 | 2.4       | 3.2             | 6.5 | ok  | even     | 12.6     | 19.2  | 1.5             | 14.1         | 2.3         | 842.7         |               |

# Spectrogram copies of compound **4b**

## <sup>1</sup>H NMR copy of compound **4b**

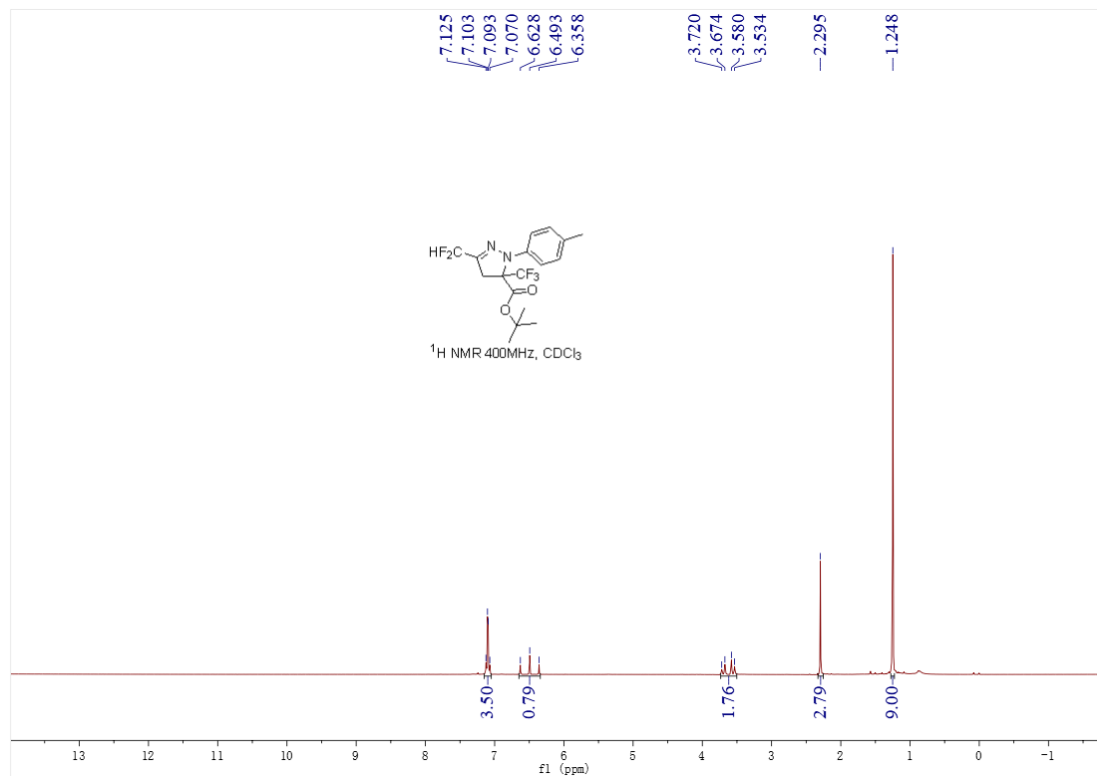

## <sup>13</sup>C NMR copy of compound **4b**

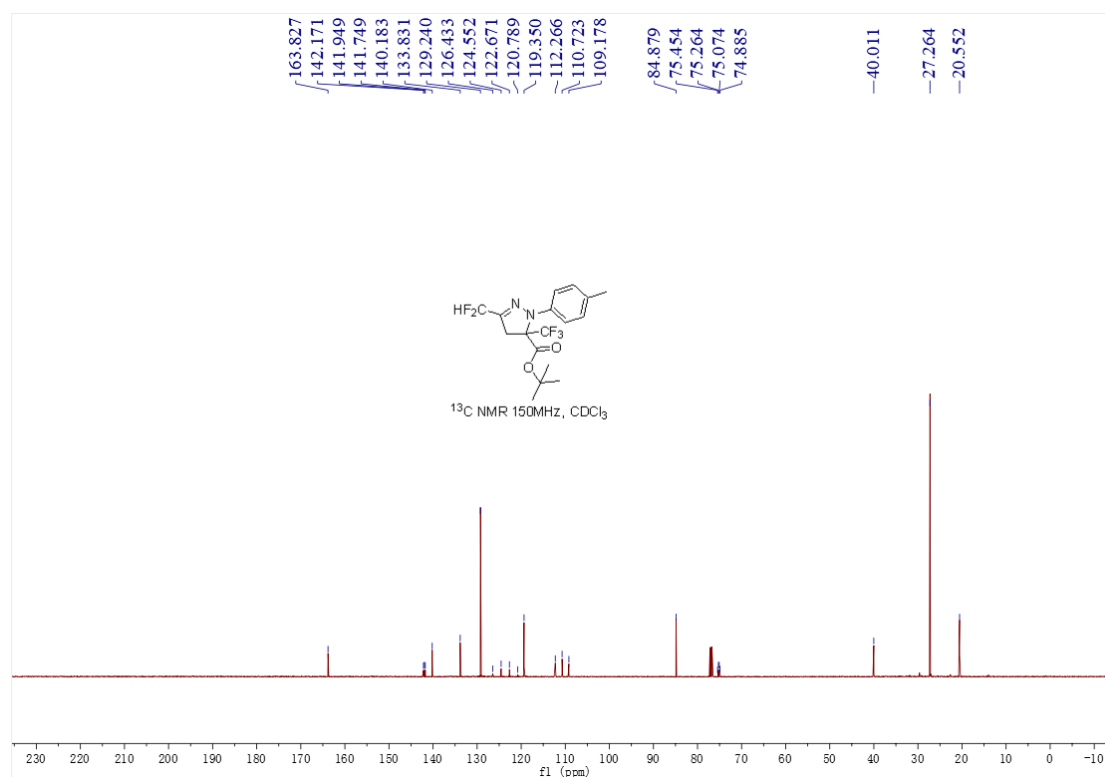

<sup>19</sup>F NMR copy of compound **4b**

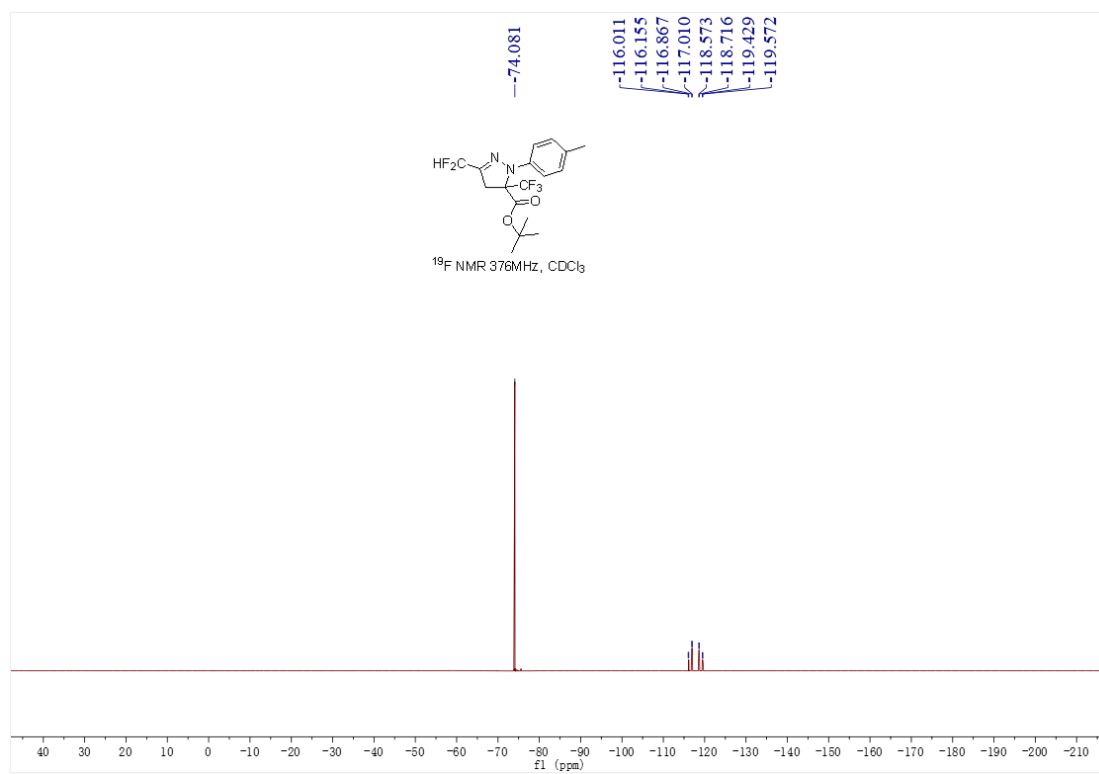

# HRMS copy of compound 4b

ZHAOSHUJUAN-35#16-60 RT: 0.07-0.27 AV: 45 NL: 1.17E8  
 T: FTMS + p ESI Full lock ms [50.0000-750.0000]

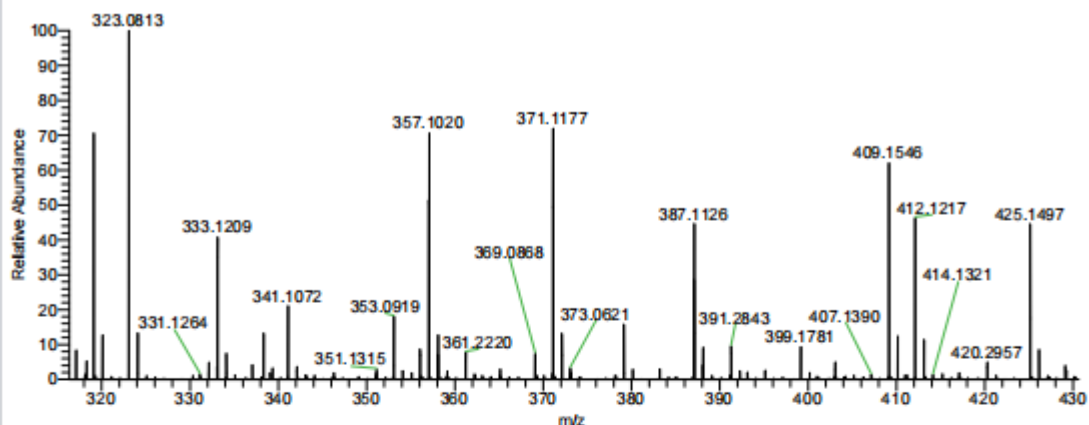

ZHAOSHUJUAN-35#16-60 RT: 0.07-0.27 AV: 45  
 T: FTMS + p ESI Full lock ms [50.0000-750.0000]  
 m/z = 377.8250-380.3262

| m/z      | Intensity  | Relative | Theo. Mass | Delta (ppm) | Composition                                                                  |
|----------|------------|----------|------------|-------------|------------------------------------------------------------------------------|
| 378.1362 | 1165817.4  | 6.21     |            |             |                                                                              |
| 378.2089 | 150825.8   | 0.80     |            |             |                                                                              |
| 378.2487 | 1131236.6  | 6.03     |            |             |                                                                              |
| 379.1441 | 18758398.0 | 100.00   | 379.1439   | 0.11        | C <sub>17</sub> H <sub>20</sub> O <sub>2</sub> N <sub>2</sub> F <sub>5</sub> |
| 380.1475 | 3280600.3  | 17.49    |            |             |                                                                              |

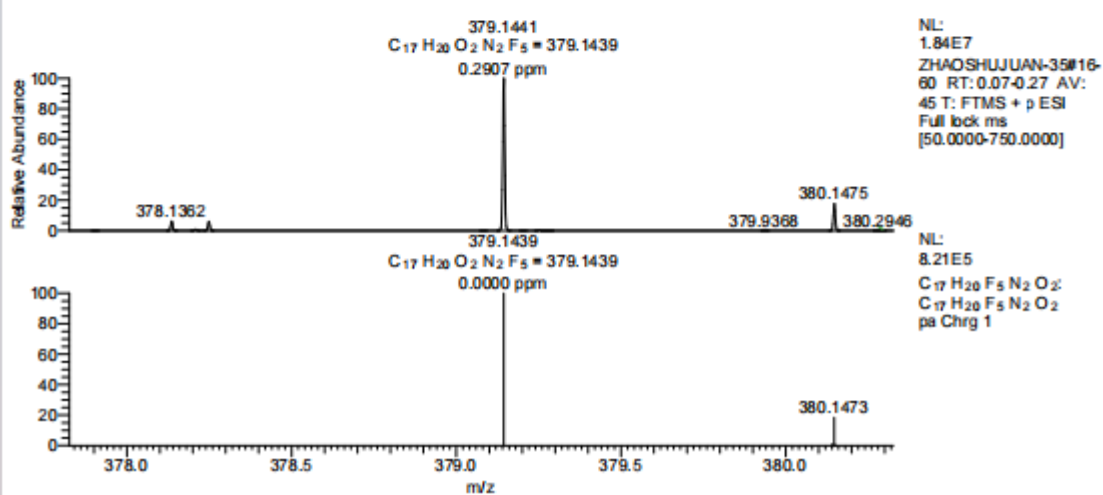

Spectrogram copies of compound **4c**

$^1\text{H}$  NMR copy of compound **4c**

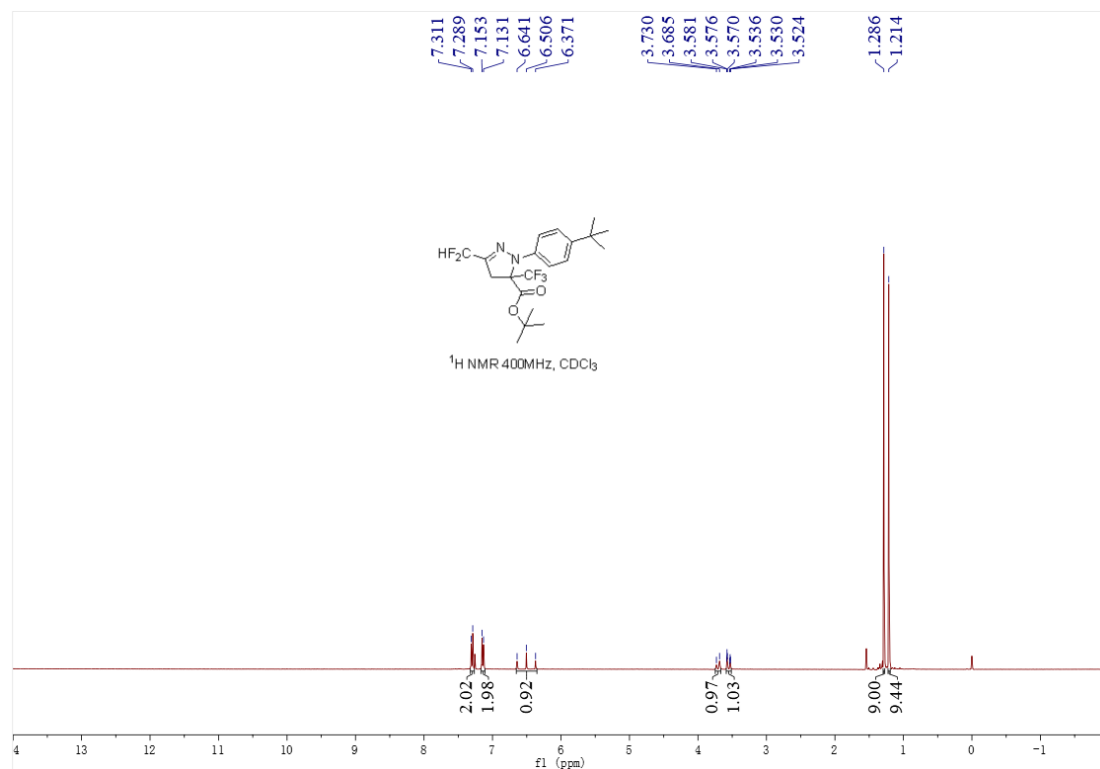

$^{13}\text{C}$  NMR copy of compound **4c**

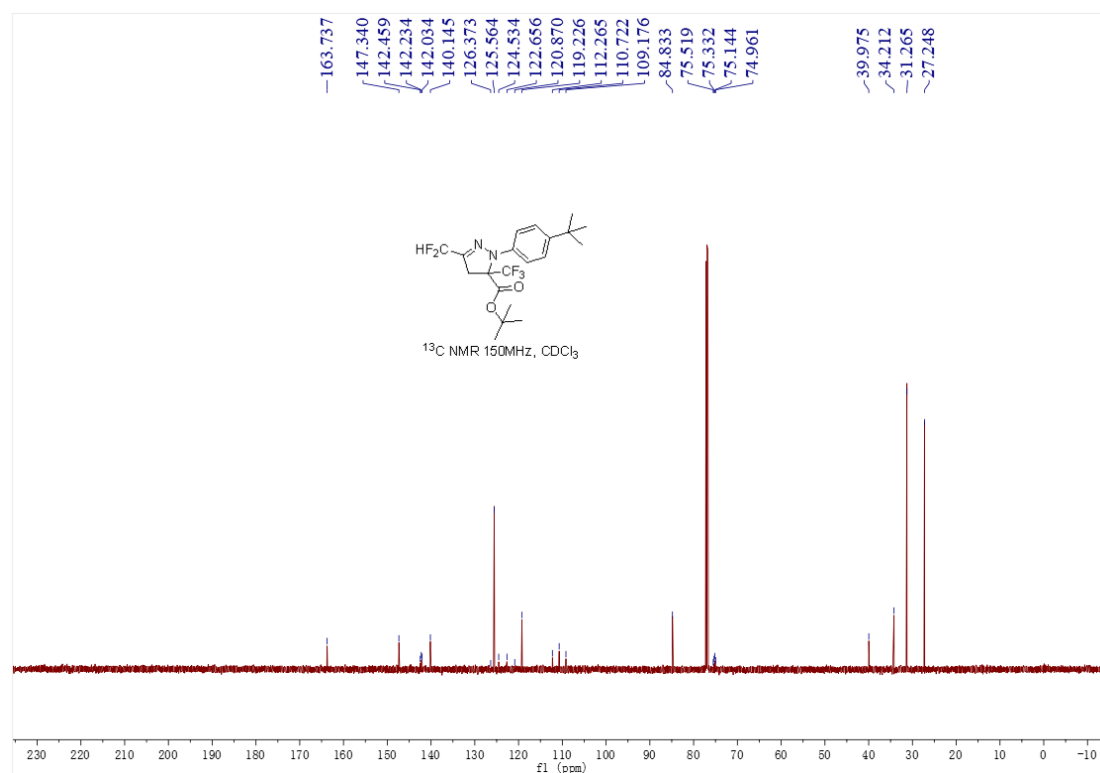

<sup>19</sup>F NMR copy of compound 4c

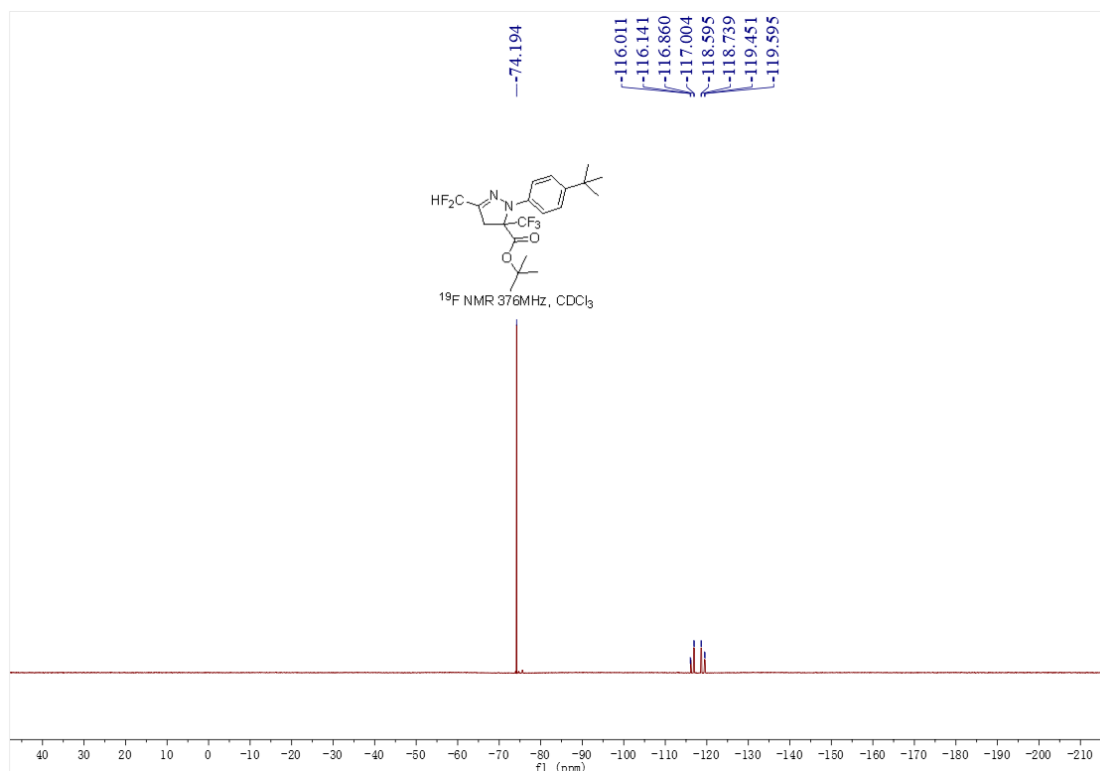

HRMS copy of compound 4c

Mass Spectrum SmartFormula Report

| Analysis Info |                                             | Acquisition Date  |                  |
|---------------|---------------------------------------------|-------------------|------------------|
| Analysis Name | D:\Data\user\NWNW-wangruikang 20240205-22.d | 2024-2-5 10:15:36 |                  |
| Method        | tune_low.m                                  | Operator          | Huyue            |
| Sample Name   | 22                                          | Instrument / Ser# | micrOTOF-Q 20453 |
| Comment       |                                             |                   |                  |

| Acquisition Parameter |          |                       |           |                  |           |
|-----------------------|----------|-----------------------|-----------|------------------|-----------|
| Source Type           | ESI      | Ion Polarity          | Positive  | Set Nebulizer    | 0.4 Bar   |
| Focus                 | Active   | Set Capillary         | 4500 V    | Set Dry Heater   | 180 j̄aC  |
| Scan Begin            | 100 m/z  | Set End Plate Offset  | -500 V    | Set Dry Gas      | 4.0 l/min |
| Scan End              | 1000 m/z | Set Collision Cell RF | 300.0 Vpp | Set Divert Valve | Waste     |

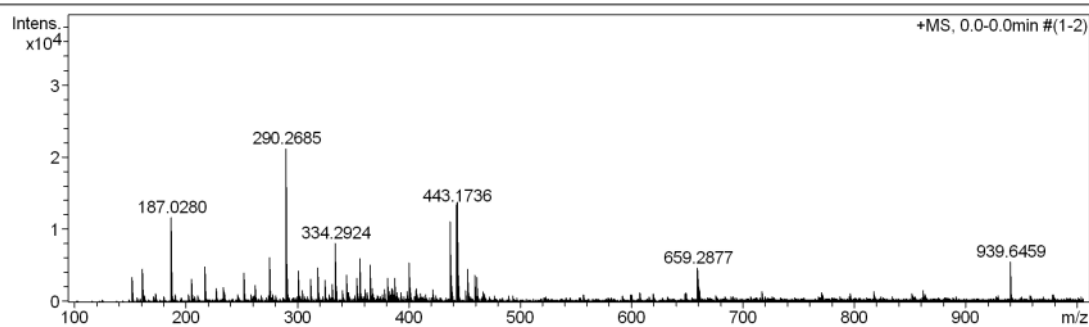

| Meas. #  | Formula                                                                          | m/z      | err [ppm] | Me an err [ppm] | rd b | N- R ul f e | e j % Con | mSi gm a | Std l | St d Me an m/z | Std l Var m | Std l Dif f | Std Com b Dev |
|----------|----------------------------------------------------------------------------------|----------|-----------|-----------------|------|-------------|-----------|----------|-------|----------------|-------------|-------------|---------------|
| 443.1736 | 1 C <sub>20</sub> H <sub>25</sub> F <sub>5</sub> N <sub>2</sub> NaO <sub>2</sub> | 443.1728 | -1.7      | -1.7            | 6.5  | ok          | even      | 39.2     | 60.1  | 0.8            | 29.5        | 0.1         | 842.7         |

# Spectrogram copies of compound **4d**

## <sup>1</sup>H NMR copy of compound **4d**

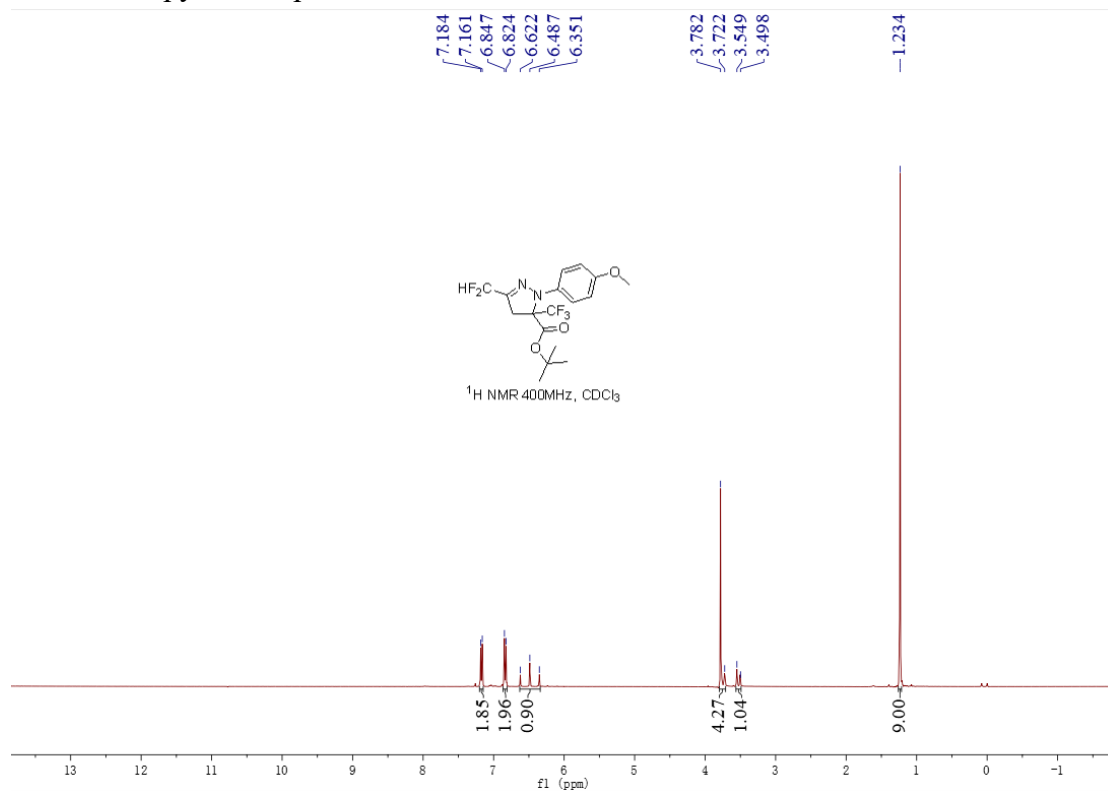

## <sup>13</sup>C NMR copy of compound **4d**

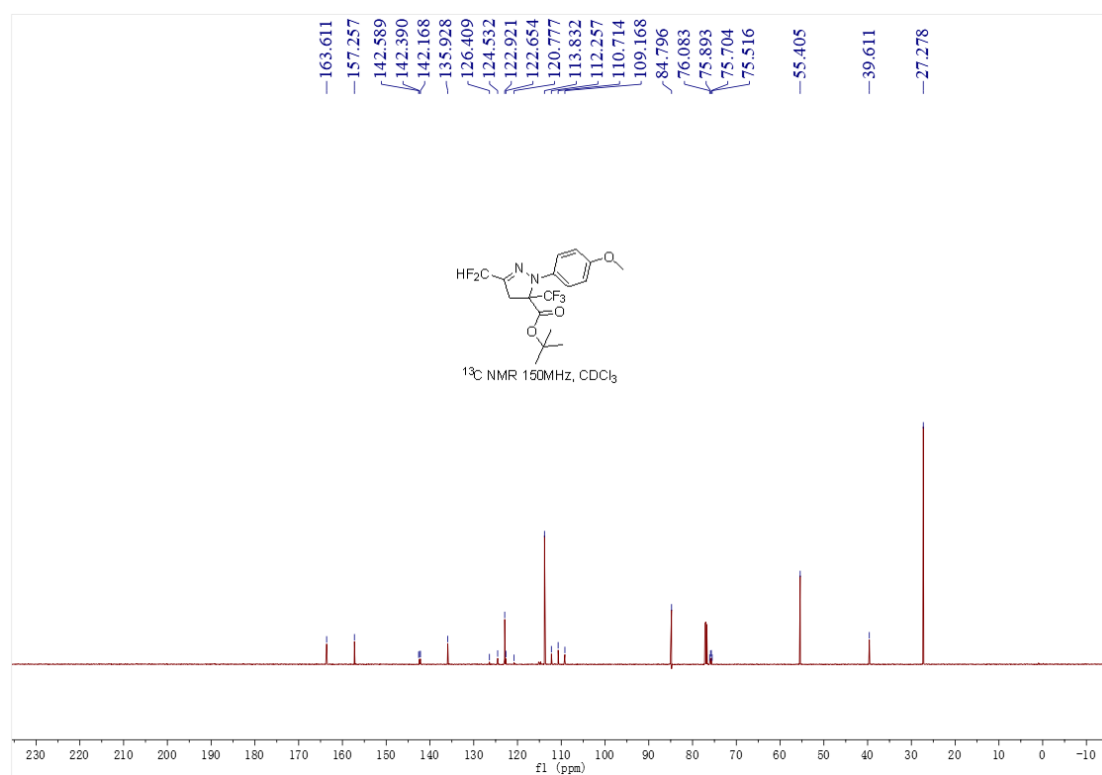



<sup>19</sup>F NMR copy of compound **4d**

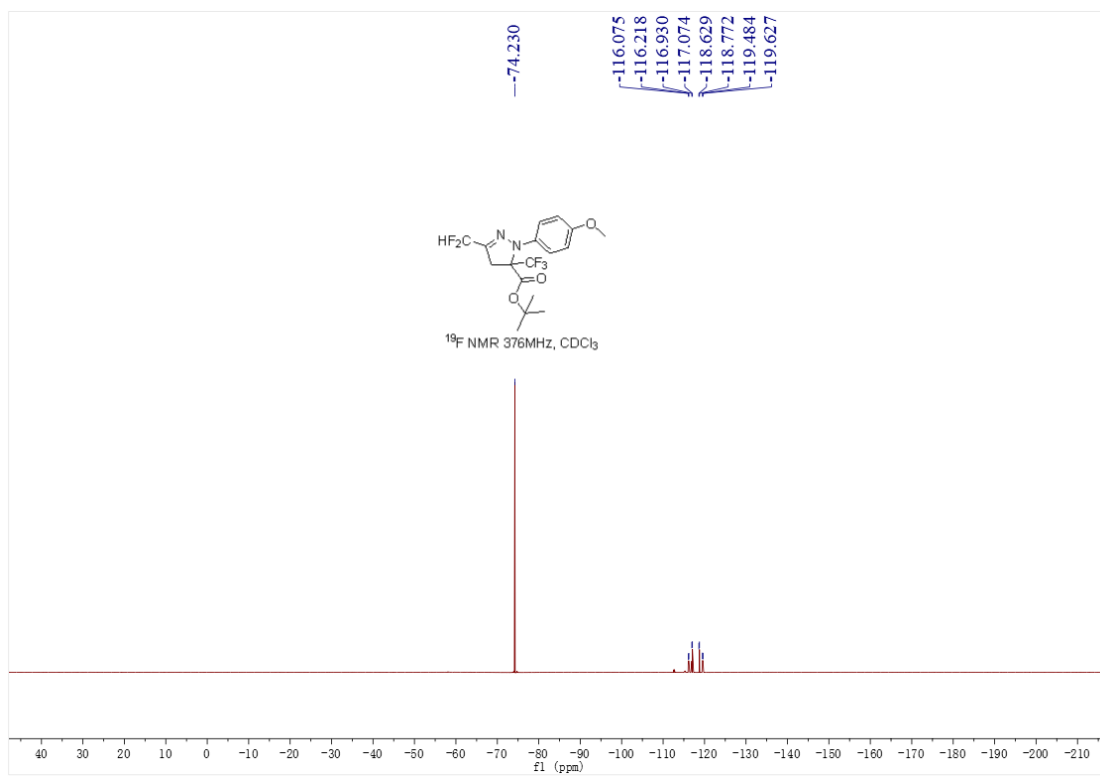

# HRMS copy of compound 4d

ZHAOXIUJUAN-W3#5-55 RT: 0.02-0.24 AV: 51 NL: 9.27E7  
T: FTMS + p ESI Full lock ms [50.0000-750.0000]

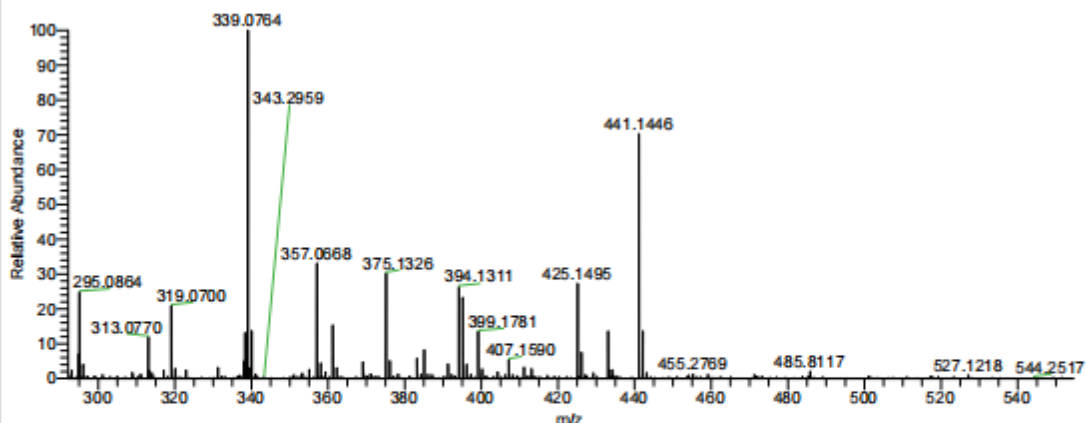

ZHAOXIUJUAN-W3#5-55 RT: 0.02-0.24 AV: 51  
T: FTMS + p ESI Full lock ms [50.0000-750.0000]  
m/z= 392.2451-399.1363

| m/z      | Intensity  | Relative | Theo. Mass | Delta (ppm) | Composition                                                                  |
|----------|------------|----------|------------|-------------|------------------------------------------------------------------------------|
| 392.2877 | 1000421.0  | 4.06     |            |             |                                                                              |
| 394.1311 | 24638958.0 | 100.00   |            |             |                                                                              |
| 395.1389 | 22091790.0 | 89.66    | 395.1389   | 0.02        | C <sub>17</sub> H <sub>20</sub> O <sub>3</sub> N <sub>2</sub> F <sub>5</sub> |
| 396.1427 | 3790185.8  | 15.38    |            |             |                                                                              |
| 397.2723 | 1065636.3  | 4.33     |            |             |                                                                              |

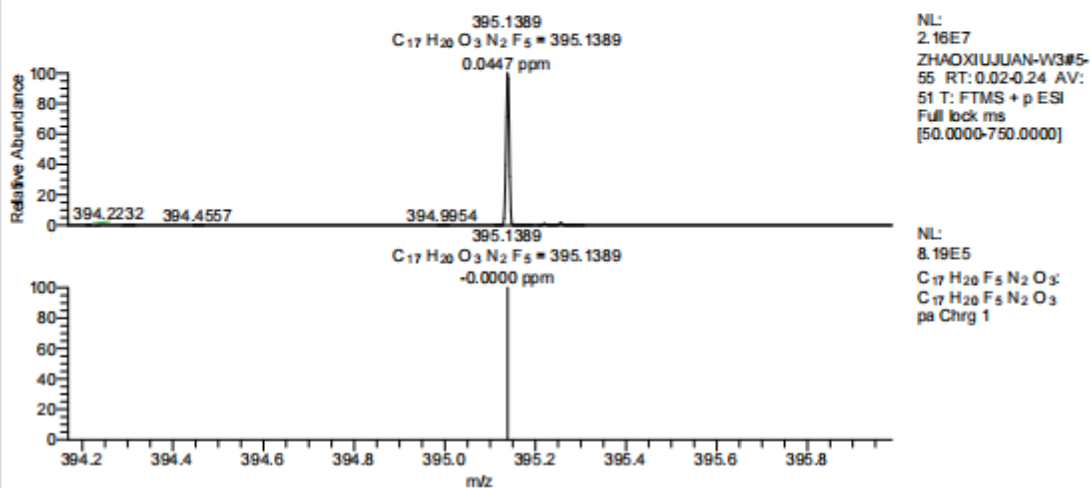

Spectrogram copies of compound **4e**

$^1\text{H}$  NMR copy of compound **4e**

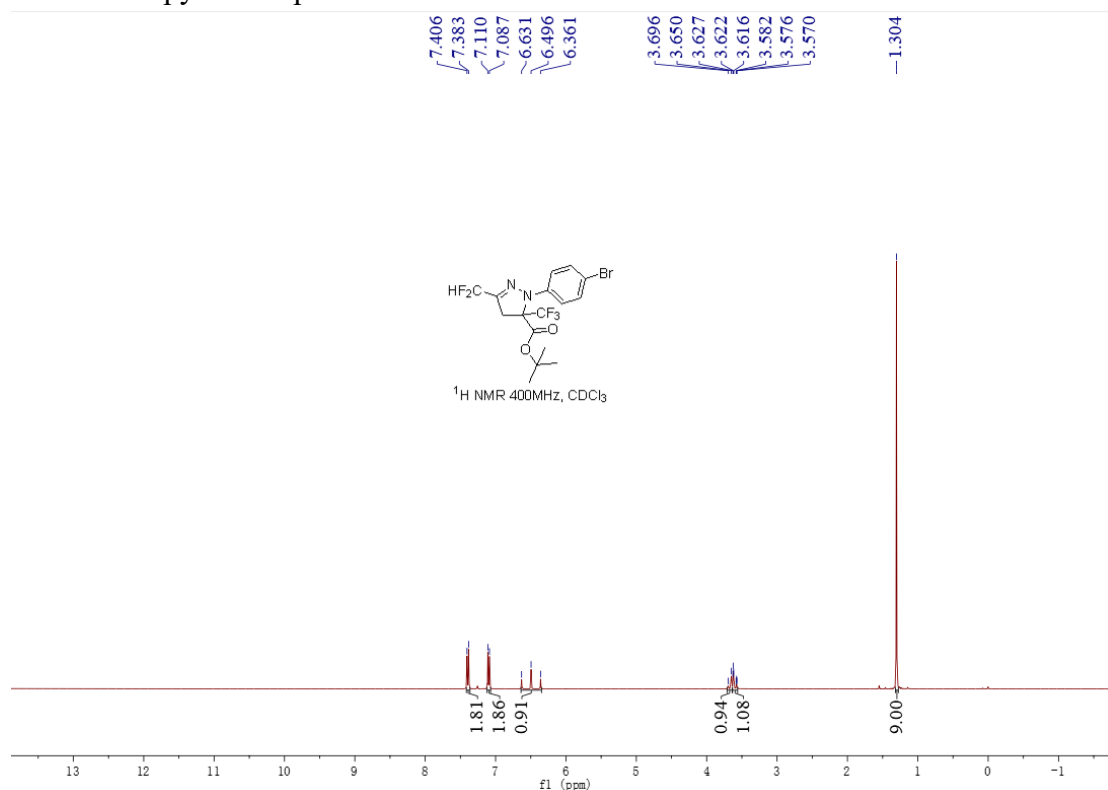

$^{13}\text{C}$  NMR copy of compound **4e**

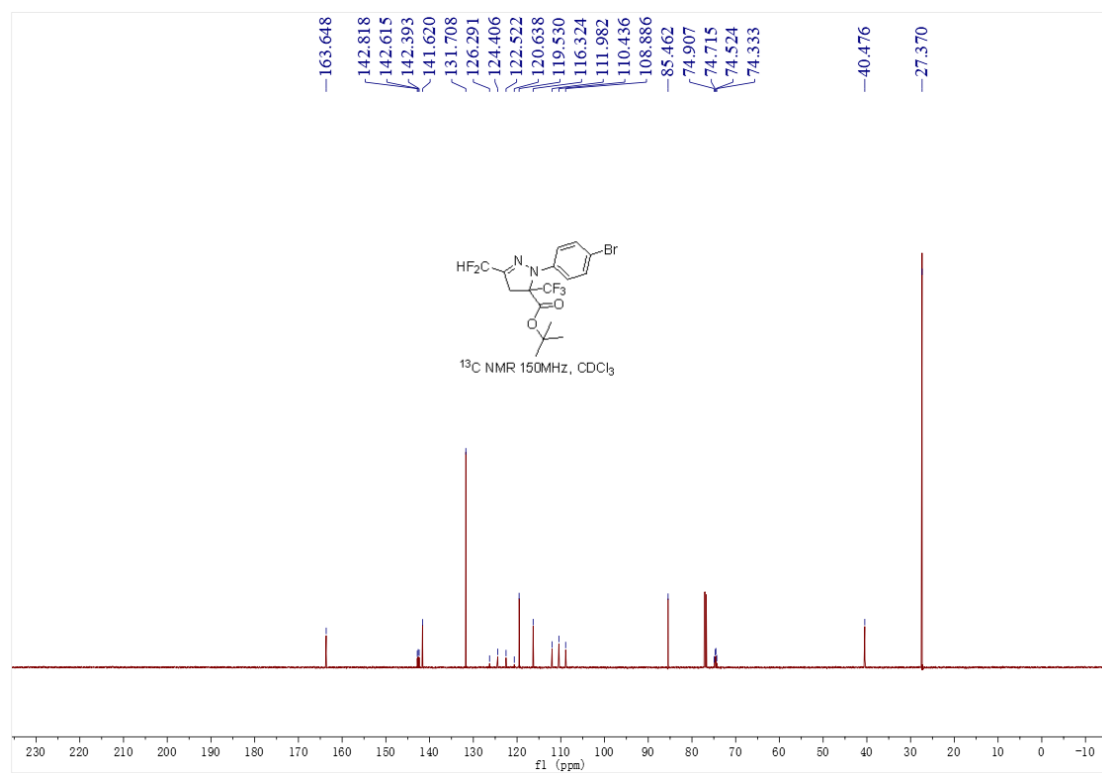

<sup>19</sup>F NMR copy of compound 4e

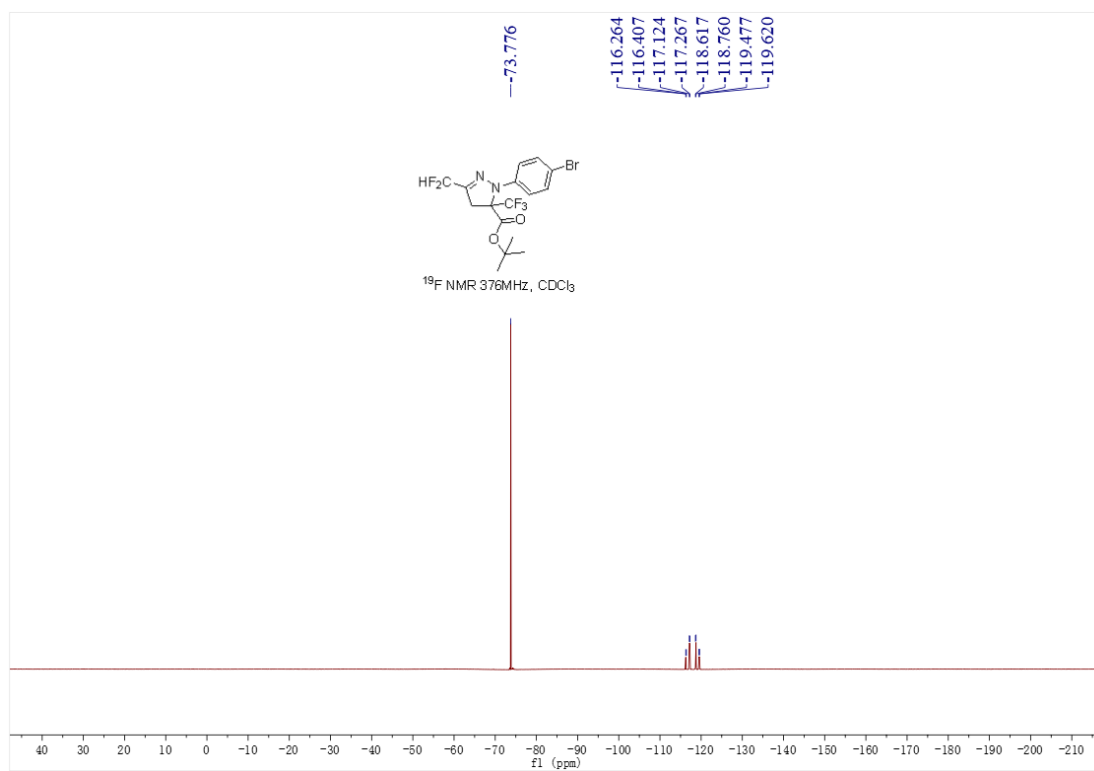

HRMS copy of compound 4e

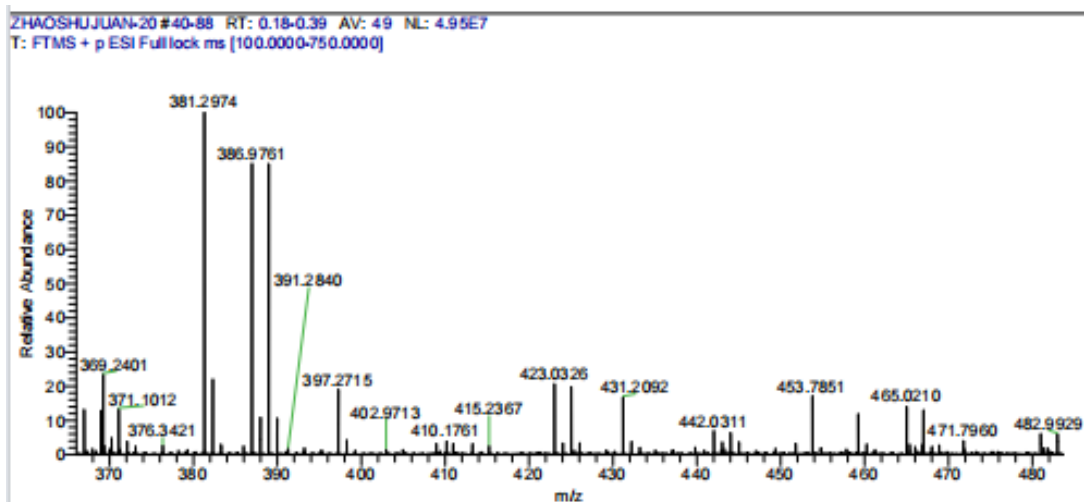

ZHAOSHUJUAN-20#40-88 RT: 0.18-0.39 AV: 49  
T: FTMS + p ESI Full lock ms [100.0000-750.0000]  
m/z = 442.7385-443.4259

| m/z      | Intensity | Relative | Theo. Mass | Delta (ppm) | Composition                                                                    |
|----------|-----------|----------|------------|-------------|--------------------------------------------------------------------------------|
| 442.8936 | 540896.4  | 30.26    | 443.0388   | -145.20     | C <sub>16</sub> H <sub>17</sub> O <sub>2</sub> N <sub>2</sub> BrF <sub>5</sub> |
| 443.0385 | 1787463.1 | 100.00   | 443.0388   | -0.31       | C <sub>16</sub> H <sub>17</sub> O <sub>2</sub> N <sub>2</sub> BrF <sub>5</sub> |
| 443.2681 | 804456.9  | 45.01    | 443.0388   | 229.27      | C <sub>16</sub> H <sub>17</sub> O <sub>2</sub> N <sub>2</sub> BrF <sub>5</sub> |
| 443.3344 | 204813.8  | 11.46    | 443.0388   | 295.57      | C <sub>16</sub> H <sub>17</sub> O <sub>2</sub> N <sub>2</sub> BrF <sub>5</sub> |
| 443.3878 | 59548.9   | 3.33     |            |             |                                                                                |

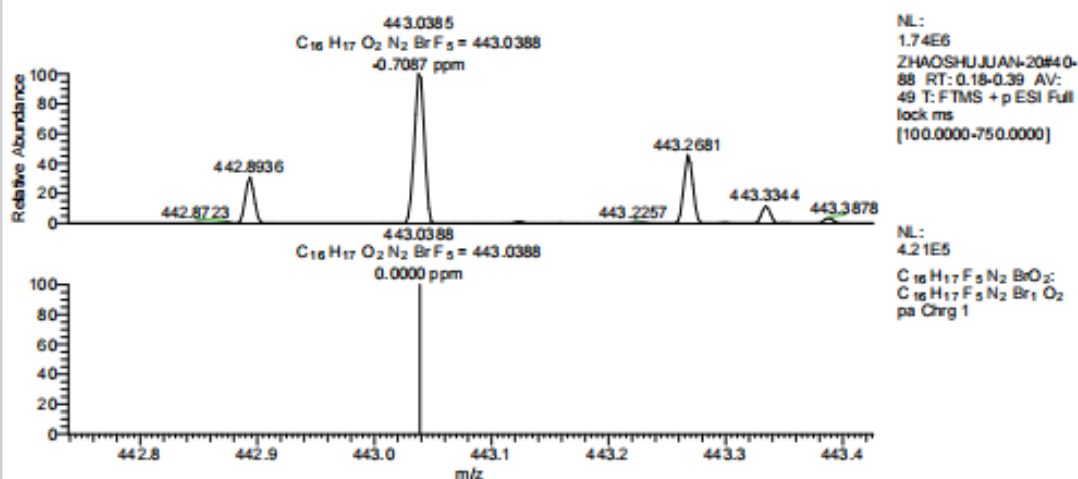

### Spectrogram copies of compound **4f**

#### <sup>1</sup>H NMR copy of compound **4f**

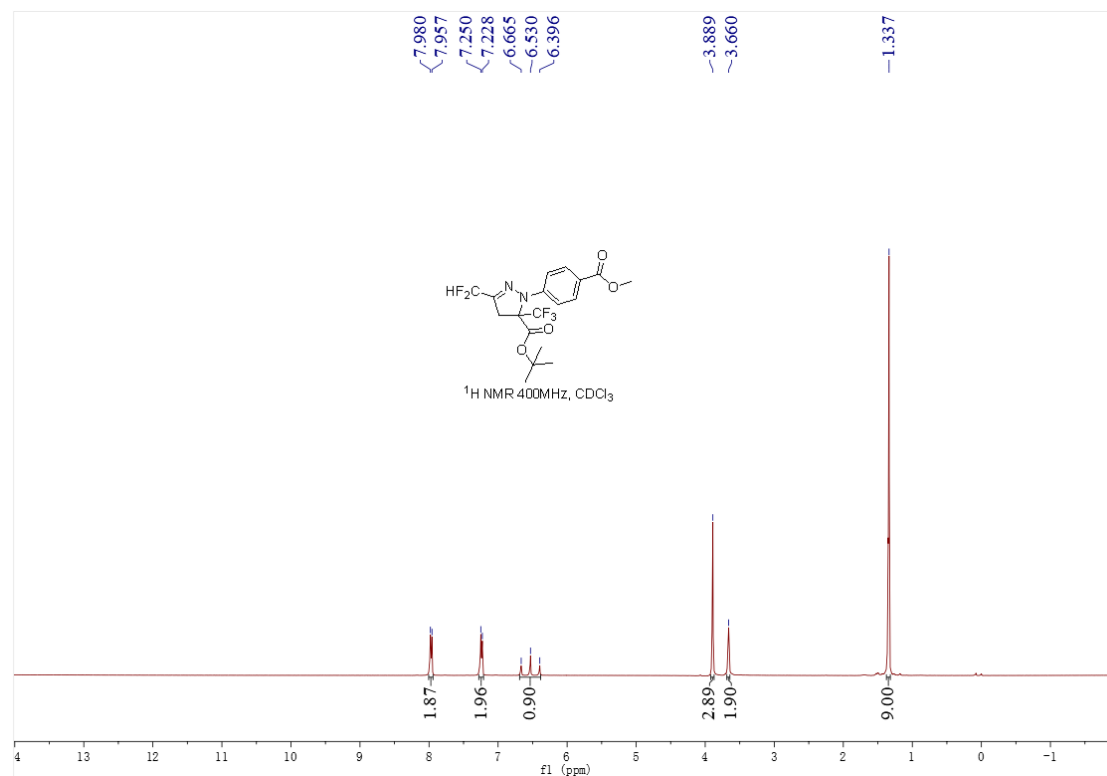

#### <sup>13</sup>C NMR copy of compound **4f**

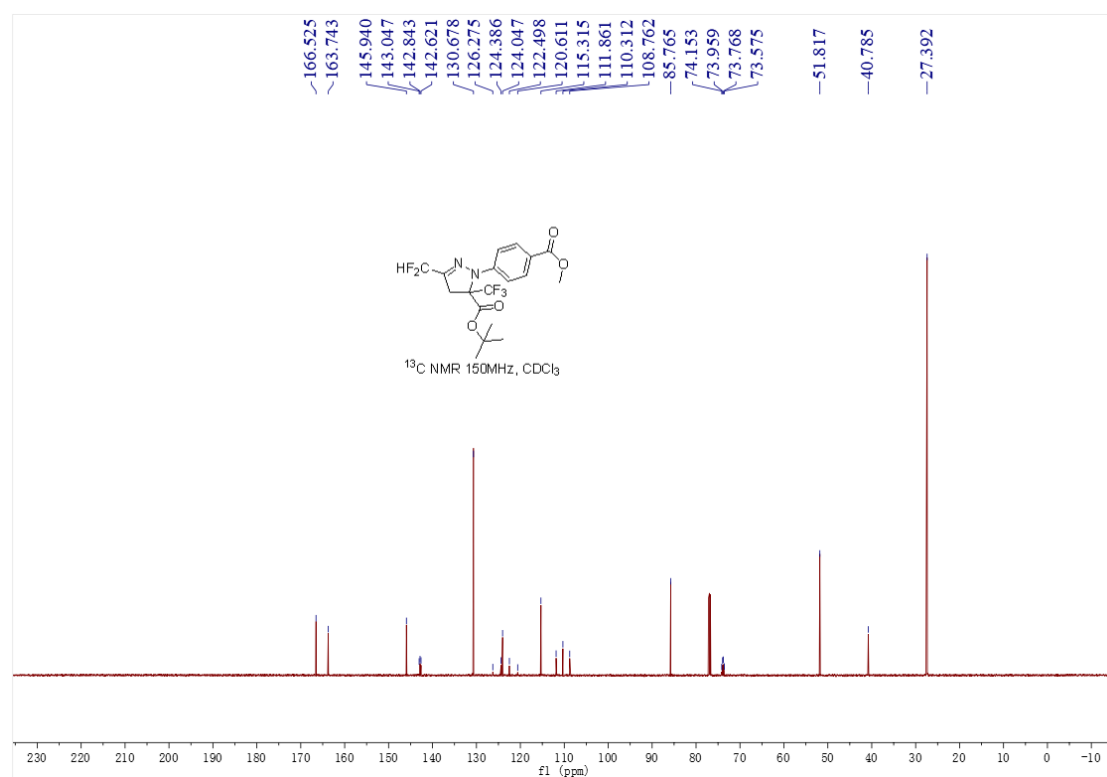

<sup>19</sup>F NMR copy of compound **4f**

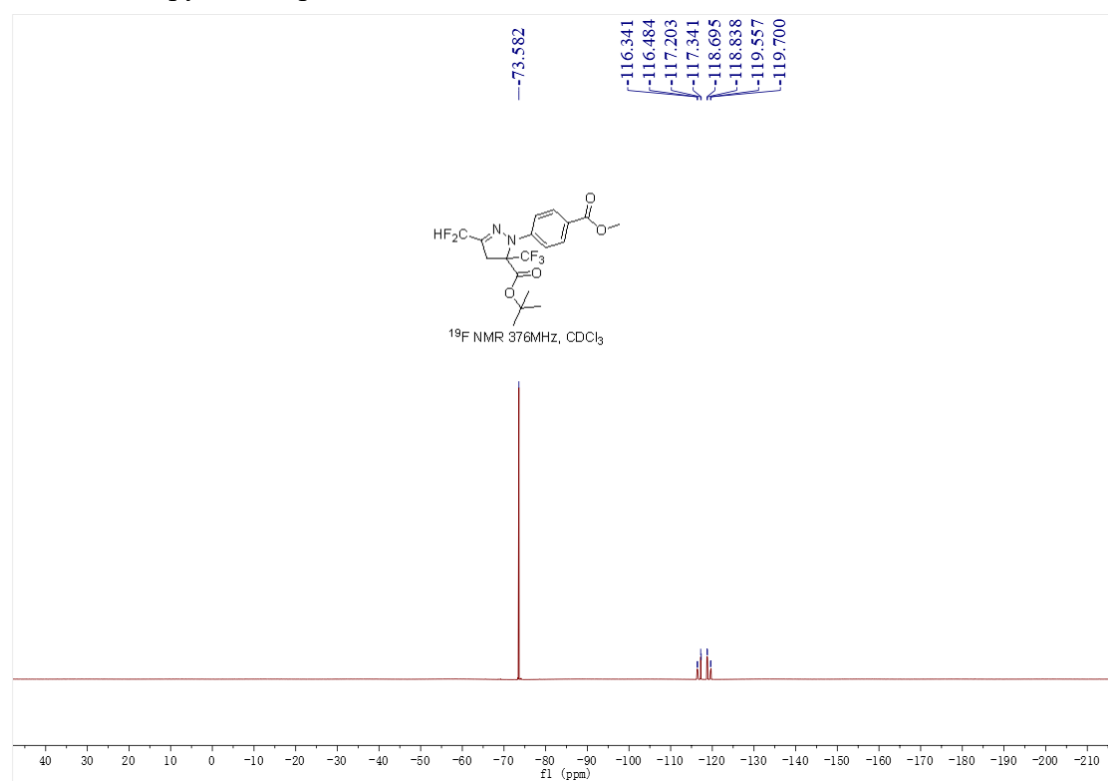

HRMS copy of compound **4f**

Mass Spectrum SmartFormula Report

Analysis Info

Analysis Name D:\Data\user\NWNW-wangruikang 20240205-29.d  
 Method tune\_low.m  
 Sample Name 29  
 Comment

Acquisition Date 2024-2-5 10:28:05  
 Operator Huyue  
 Instrument / Ser# micrOTOF-Q 20453

Acquisition Parameter

|             |          |                       |           |                  |           |
|-------------|----------|-----------------------|-----------|------------------|-----------|
| Source Type | ESI      | Ion Polarity          | Positive  | Set Nebulizer    | 0.4 Bar   |
| Focus       | Active   | Set Capillary         | 4500 V    | Set Dry Heater   | 180 j°C   |
| Scan Begin  | 100 m/z  | Set End Plate Offset  | -500 V    | Set Dry Gas      | 4.0 l/min |
| Scan End    | 1000 m/z | Set Collision Cell RF | 400.0 Vpp | Set Divert Valve | Waste     |

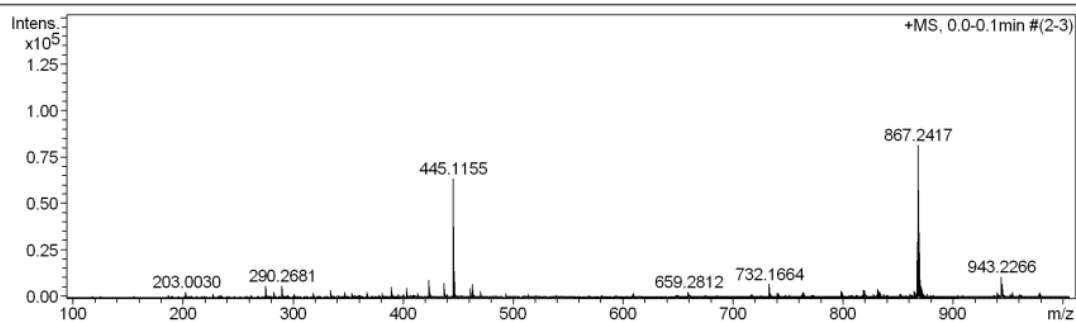

| Meas. #  | Formula                    | m/z      | err [ppm] | Me an err [ppm] | rdb | N-R ul e | ej% Conf | mS ig ma | Std l | Std Me an m/z | Std Va rN or m | Std m/z Diff | Std Com b Dev |
|----------|----------------------------|----------|-----------|-----------------|-----|----------|----------|----------|-------|---------------|----------------|--------------|---------------|
| 445.1155 | 1 C 18 H 19 F 5 N 2 Na O 4 | 445.1157 | 0.6       | 0.8             | 7.5 | ok       | even     | 9.3      | 17.0  | 0.7           | 7.3            | 0.0          | 842.7         |

# Spectrogram copies of compound **4h**

## <sup>1</sup>H NMR copy of compound **4h**

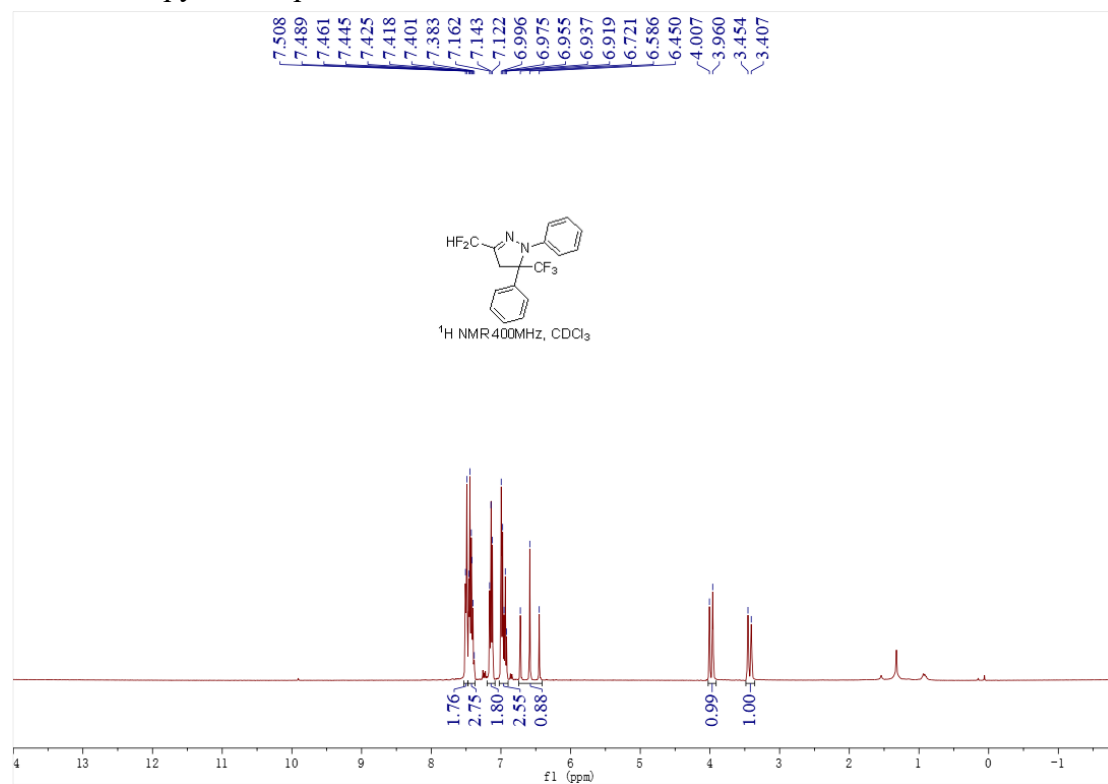

## <sup>13</sup>C NMR copy of compound **4h**

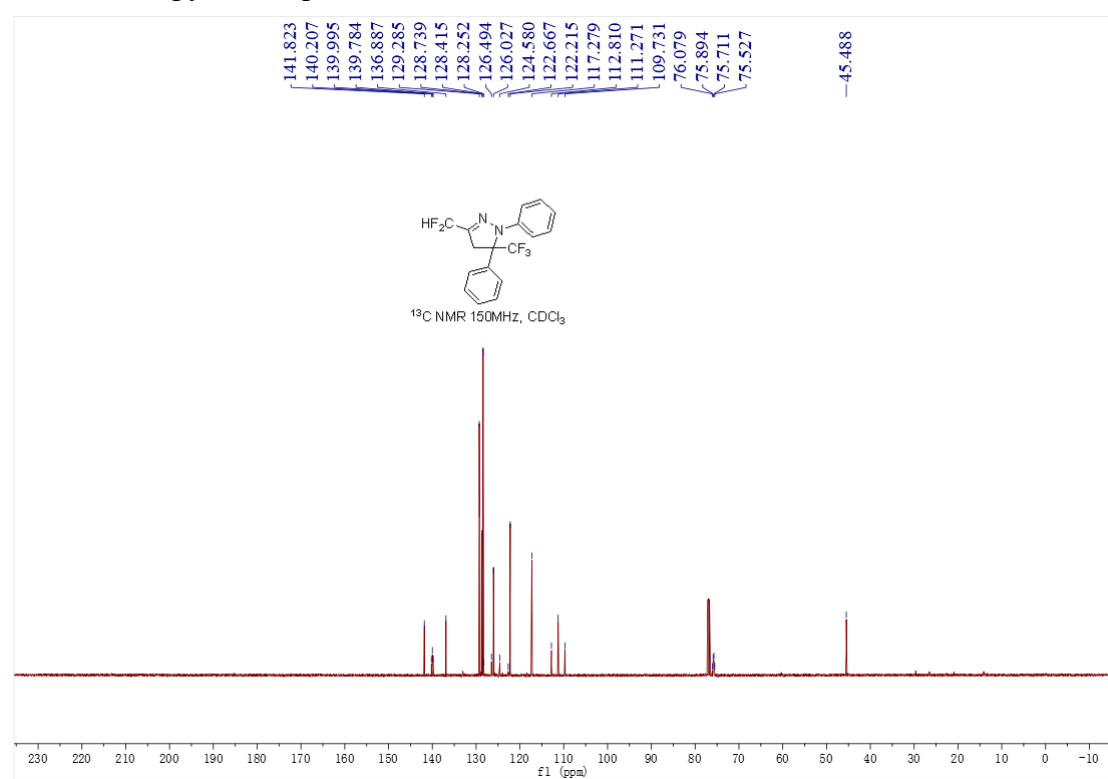



<sup>19</sup>F NMR copy of compound **4h**

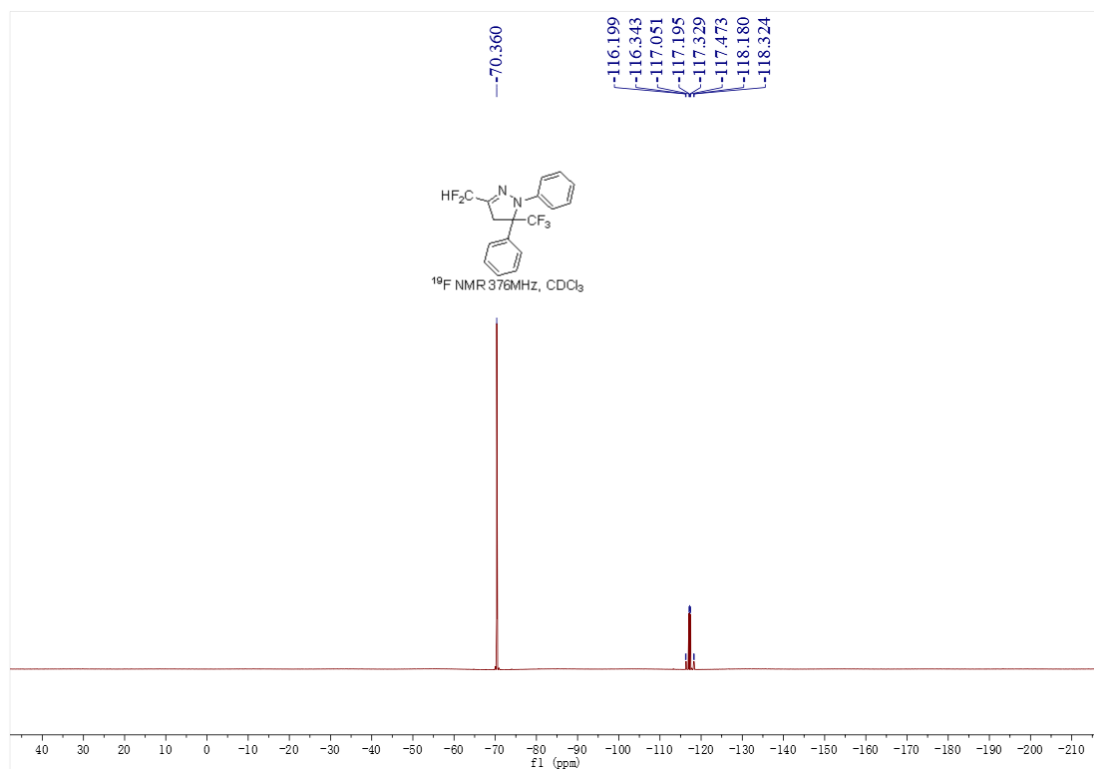

# HRMS copy of compound 4h

ZHAOSHUJUAN-35#16-59 RT: 0.07-0.26 AV: 44 NL: 1.17E8  
T: FTMS + p ESI Full lock ms [50.0000-750.0000]

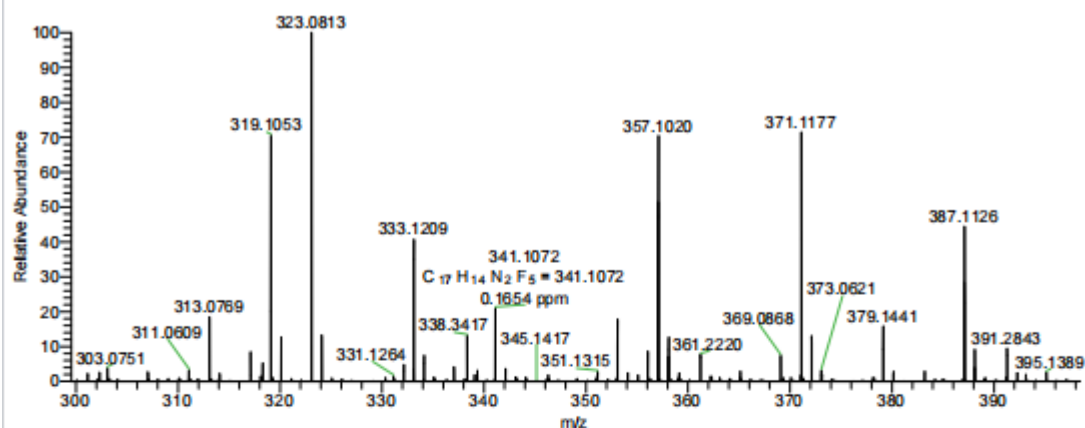

ZHAOSHUJUAN-35#16-59 RT: 0.07-0.26 AV: 44  
T: FTMS + p ESI Full lock ms [50.0000-750.0000]  
m/z = 340.0514-341.9577

| m/z      | Intensity  | Relative | Theo. Mass | Delta (ppm) | Composition                                                   |
|----------|------------|----------|------------|-------------|---------------------------------------------------------------|
| 340.0800 | 214961.9   | 0.87     |            |             |                                                               |
| 340.0996 | 214800.3   | 0.87     |            |             |                                                               |
| 340.3484 | 347972.5   | 1.41     |            |             |                                                               |
| 341.0357 | 411597.9   | 1.67     | 341.1072   | -71.50      | C <sub>17</sub> H <sub>14</sub> N <sub>2</sub> F <sub>5</sub> |
| 341.1072 | 24594608.0 | 100.00   | 341.1072   | 0.06        | C <sub>17</sub> H <sub>14</sub> N <sub>2</sub> F <sub>5</sub> |

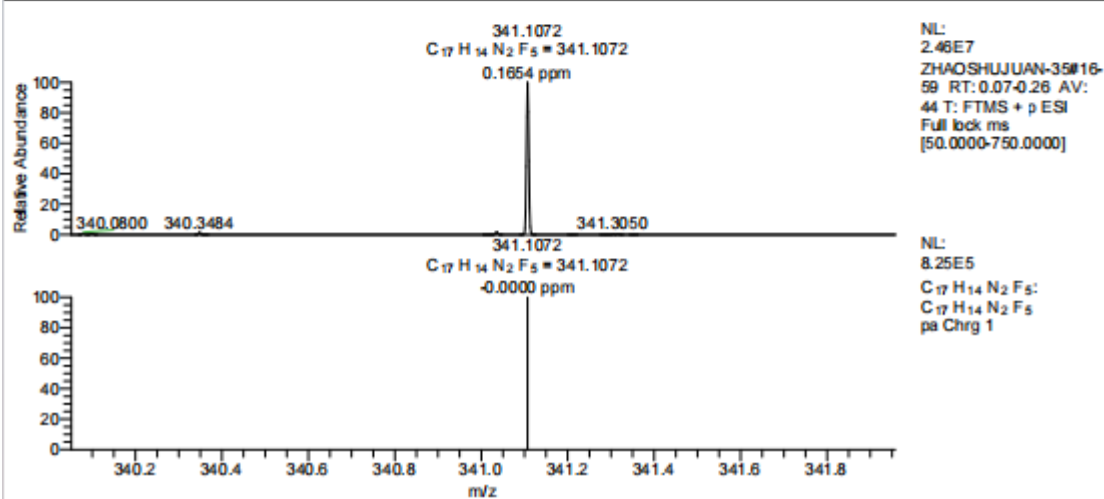

# Spectrogram copies of compound **4i**

## <sup>1</sup>H NMR copy of compound **4i**

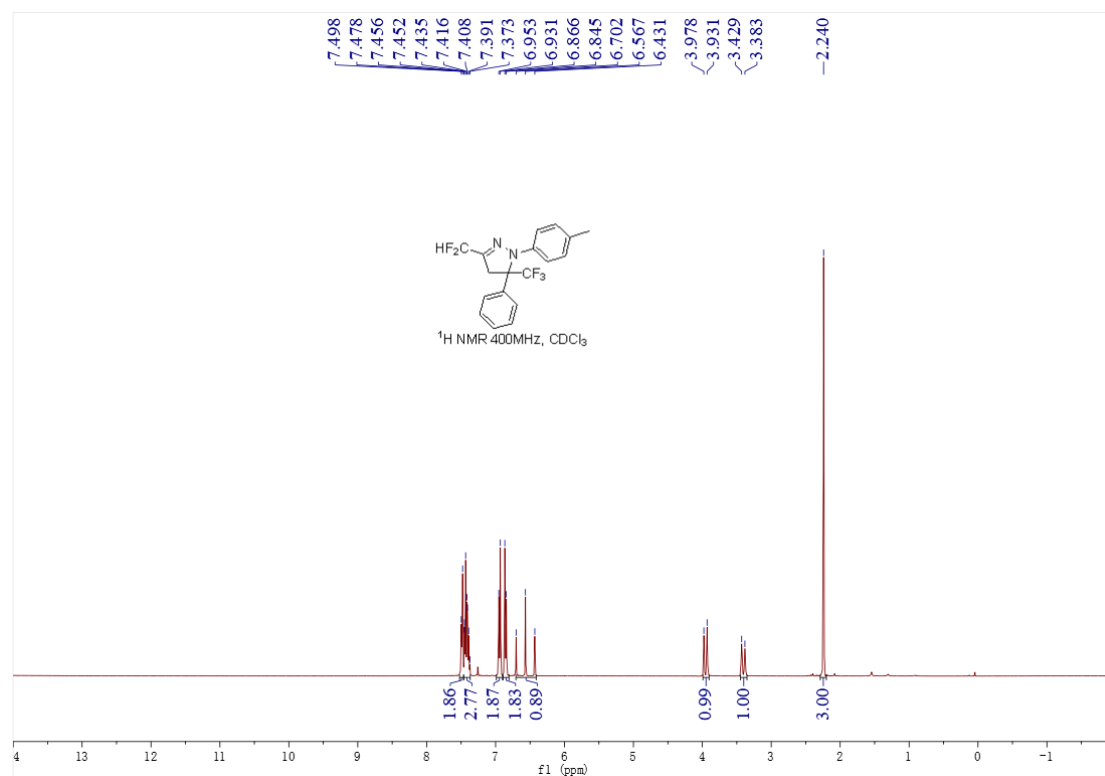

## <sup>13</sup>C NMR copy of compound **4i**

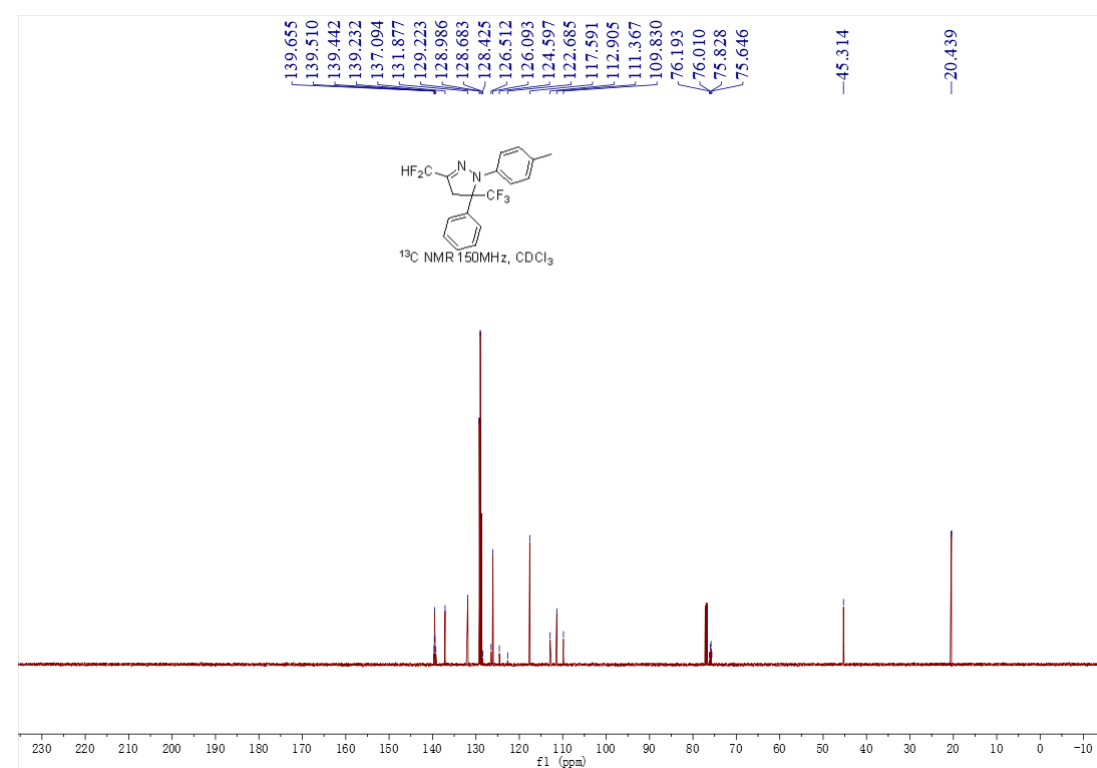

<sup>19</sup>F NMR copy of compound **4i**

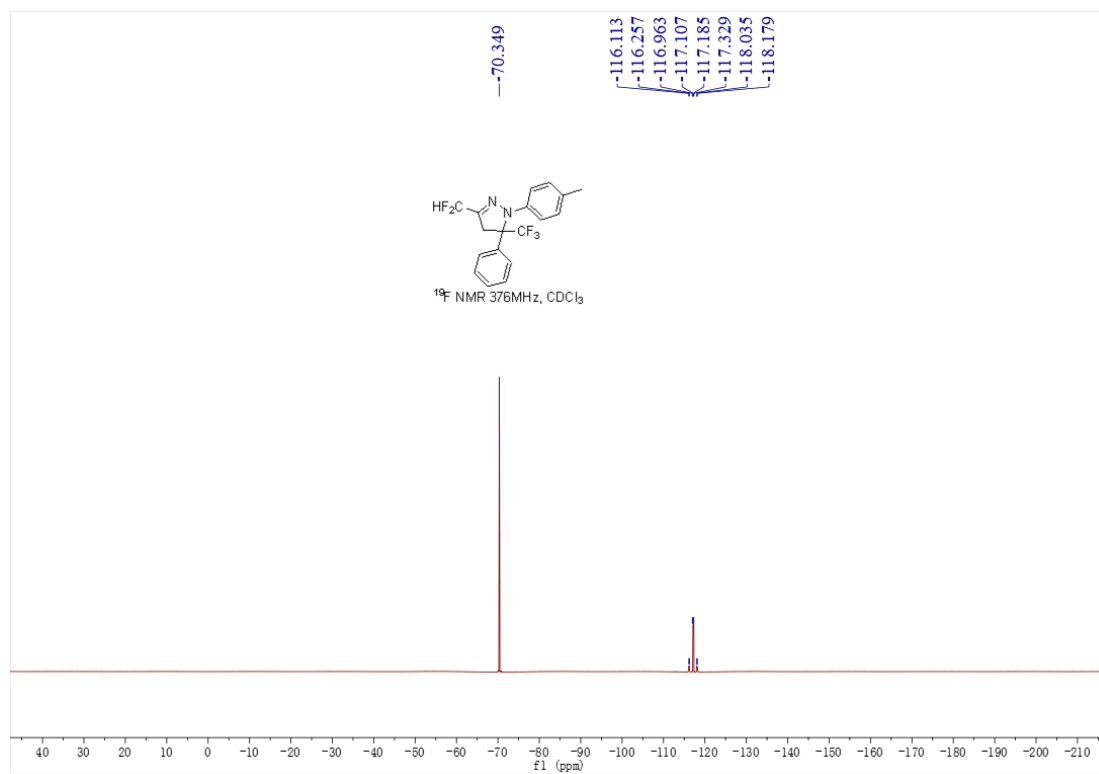

# HRMS copy of compound 4i

ZHAOSHUJUAN-38#22-67 RT: 0.10-0.30 AV: 46 NL: 1.69E8  
T: FTMS + p ESI Full lock ms [50.0000-750.0000]

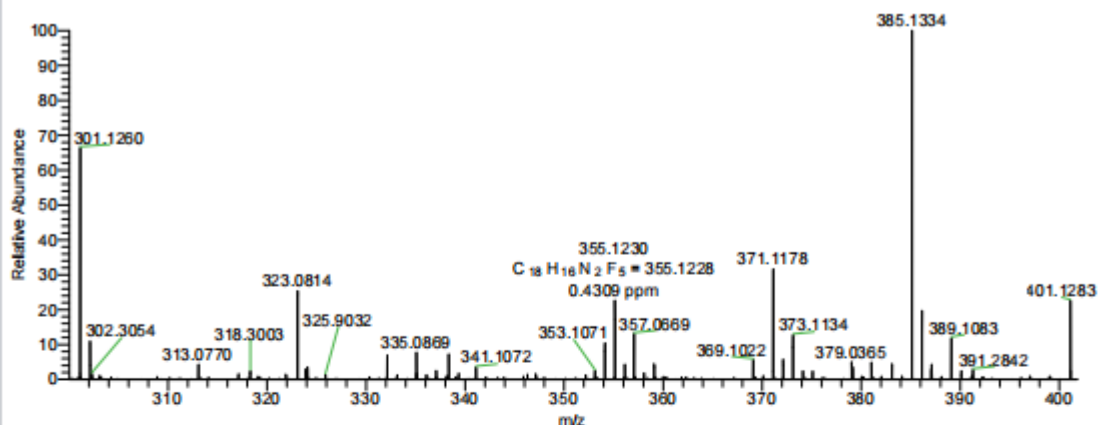

ZHAOSHUJUAN-38#22-67 RT: 0.10-0.30 AV: 46  
T: FTMS + p ESI Full lock ms [50.0000-750.0000]  
m/z = 354.3676-355.7585

| m/z      | Intensity  | Relative | Theo. Mass | Delta (ppm) | Composition                                                   |
|----------|------------|----------|------------|-------------|---------------------------------------------------------------|
| 354.4092 | 29261.1    | 0.08     |            |             |                                                               |
| 355.0988 | 837586.1   | 2.17     | 355.1228   | -24.05      | C <sub>18</sub> H <sub>16</sub> N <sub>2</sub> F <sub>5</sub> |
| 355.1230 | 38525624.0 | 100.00   | 355.1228   | 0.15        | C <sub>18</sub> H <sub>16</sub> N <sub>2</sub> F <sub>5</sub> |
| 355.1799 | 16670.2    | 0.04     | 355.1228   | 57.05       | C <sub>18</sub> H <sub>16</sub> N <sub>2</sub> F <sub>5</sub> |
| 355.3204 | 28856.3    | 0.07     | 355.1228   | 197.55      | C <sub>18</sub> H <sub>16</sub> N <sub>2</sub> F <sub>5</sub> |

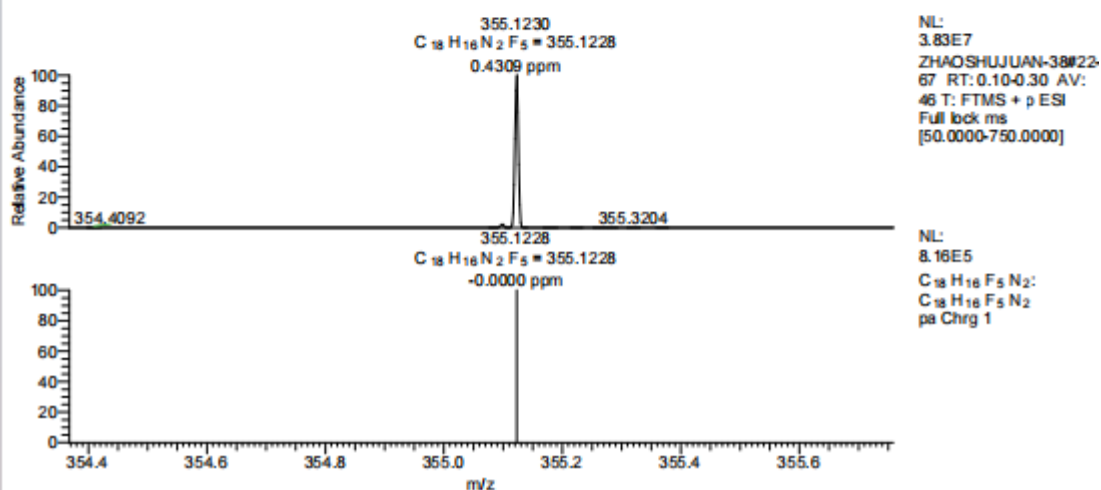

### Spectrogram copies of compound **4j**

#### $^1\text{H}$ NMR copy of compound **4j**

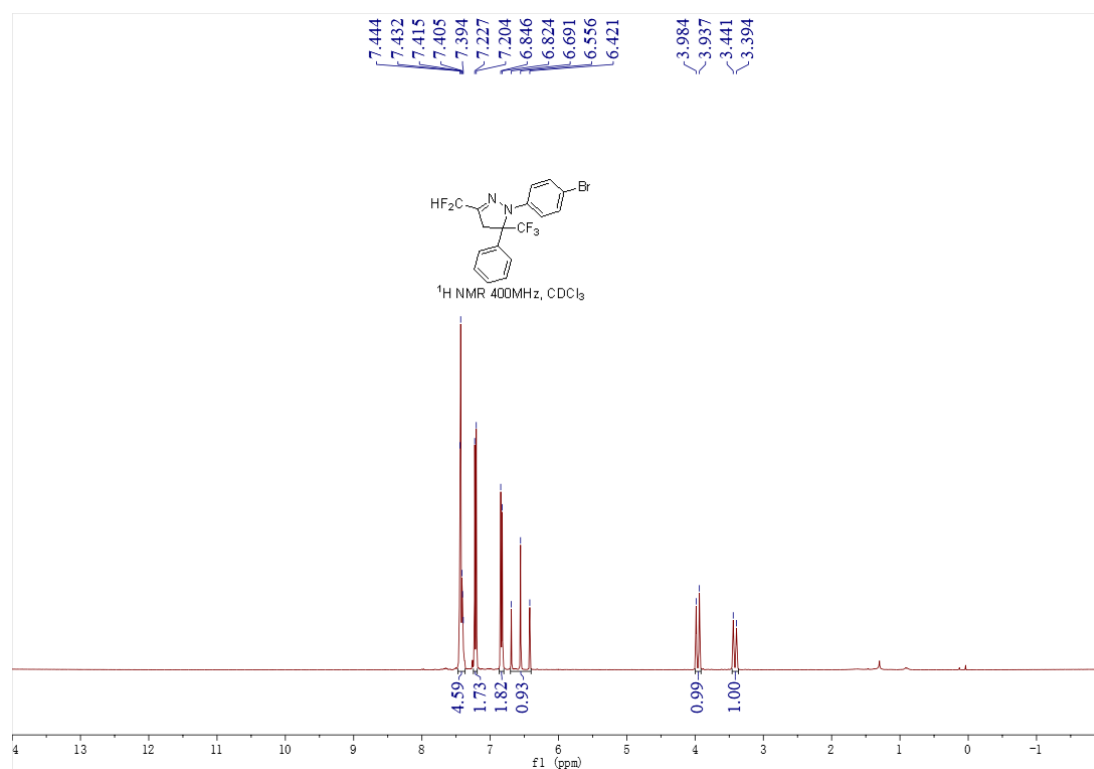

#### $^{13}\text{C}$ NMR copy of compound **4j**

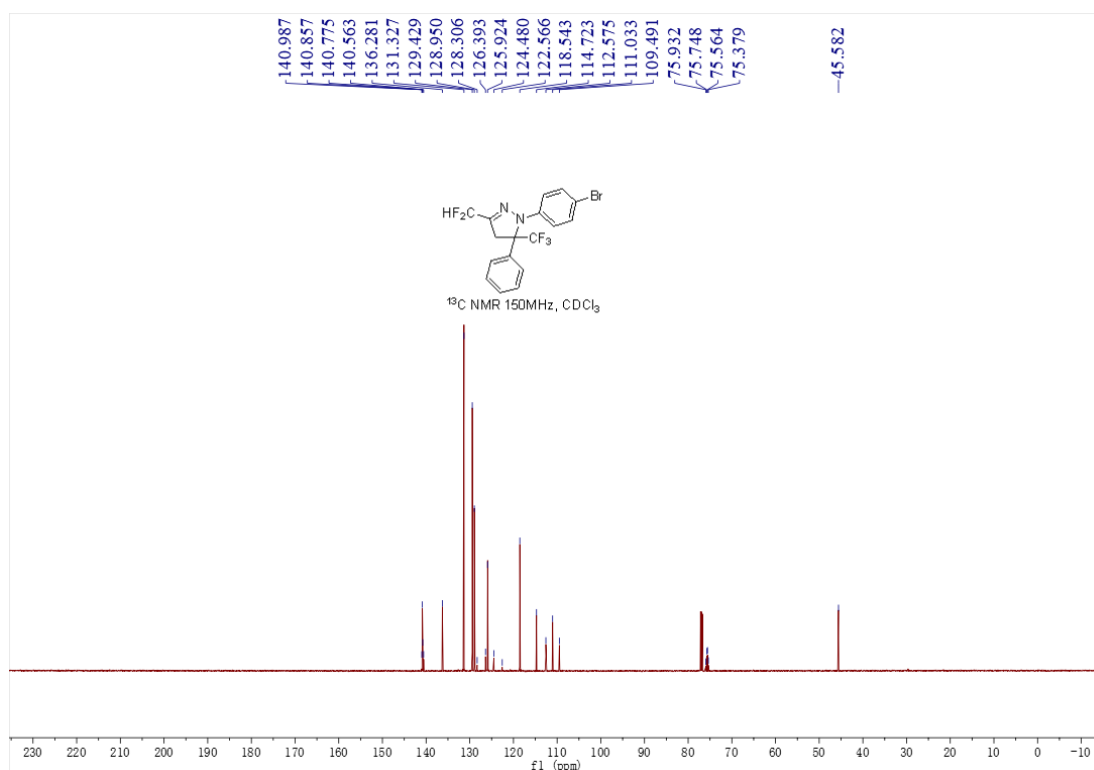

<sup>19</sup>F NMR copy of compound **4j**

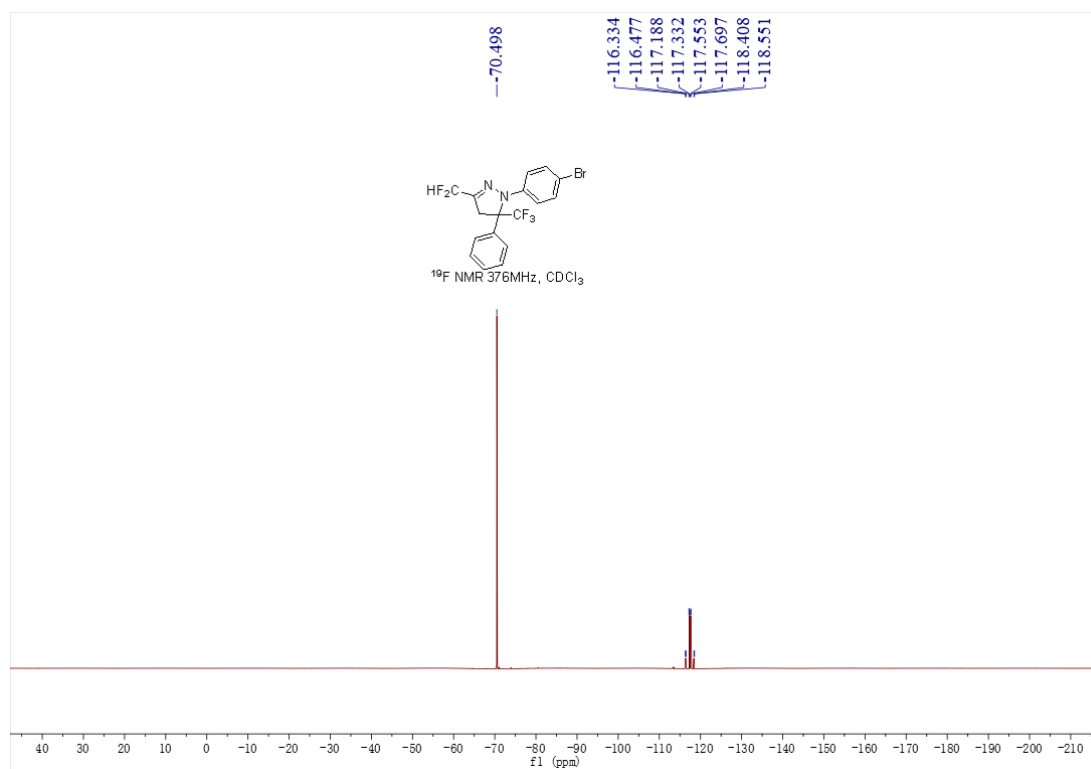

# HRMS copy of compound 4j

ZHAOSHUJUAN-41 #48-90 RT: 0.21-0.40 AV: 43 NL: 5.95E8  
 T: FTMS + p ESI Full lock ms [50.0000-750.0000]

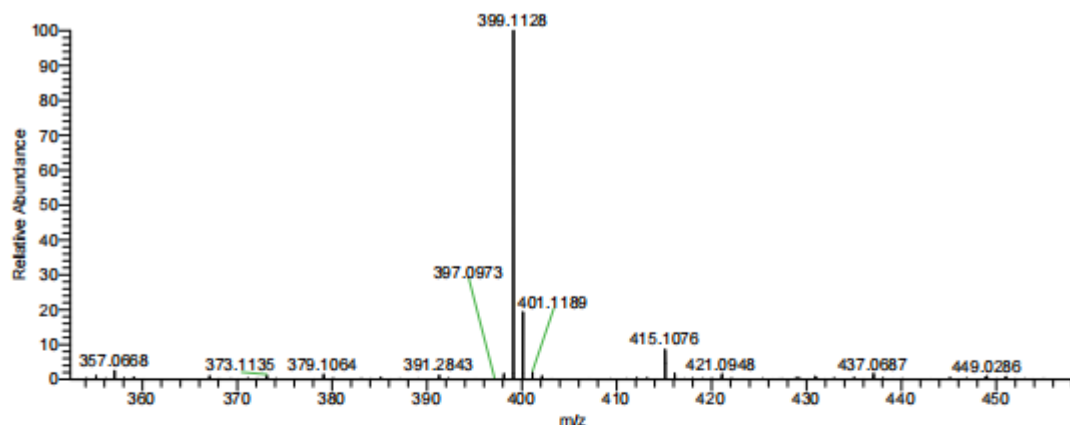

ZHAOSHUJUAN-41#48-90 RT: 0.21-0.40 AV: 43  
 T: FTMS + p ESI Full lock ms [50.0000-750.0000]  
 m/z = 418.5653-419.6632

| m/z      | Intensity | Relative | Theo. Mass | Delta (ppm) | Composition                                                     |
|----------|-----------|----------|------------|-------------|-----------------------------------------------------------------|
| 419.0178 | 1188991.6 | 100.00   | 419.0177   | 0.11        | C <sub>17</sub> H <sub>13</sub> N <sub>2</sub> BrF <sub>5</sub> |
| 419.1190 | 332982.2  | 28.01    | 419.0177   | 101.28      | C <sub>17</sub> H <sub>13</sub> N <sub>2</sub> BrF <sub>5</sub> |
| 419.1387 | 95017.9   | 7.99     | 419.0177   | 121.00      | C <sub>17</sub> H <sub>13</sub> N <sub>2</sub> BrF <sub>5</sub> |
| 419.1736 | 457920.0  | 38.51    | 419.0177   | 155.88      | C <sub>17</sub> H <sub>13</sub> N <sub>2</sub> BrF <sub>5</sub> |
| 419.3152 | 207181.4  | 17.42    | 419.0177   | 297.54      | C <sub>17</sub> H <sub>13</sub> N <sub>2</sub> BrF <sub>5</sub> |

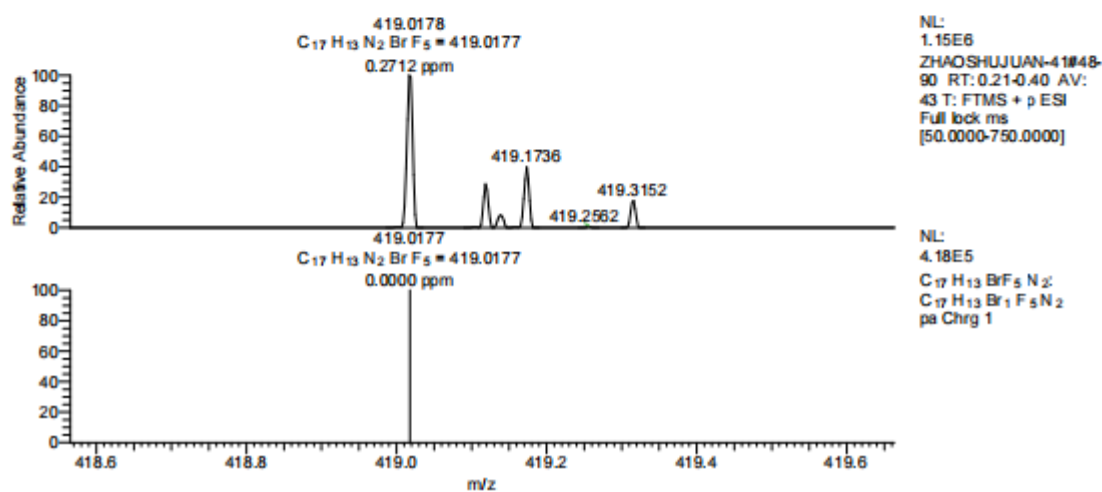

NL:  
 1.15E6  
 ZHAOSHUJUAN-41#48-90 RT: 0.21-0.40 AV: 43 T: FTMS + p ESI Full lock ms [50.0000-750.0000]

NL:  
 4.18E5  
 C<sub>17</sub>H<sub>13</sub>BrF<sub>5</sub>N<sub>2</sub>  
 C<sub>17</sub>H<sub>13</sub>Br<sub>1</sub>F<sub>5</sub>N<sub>2</sub>  
 pa Chrg 1



# Spectrogram copies of compound **4k**

## <sup>1</sup>H NMR copy of compound **4k**

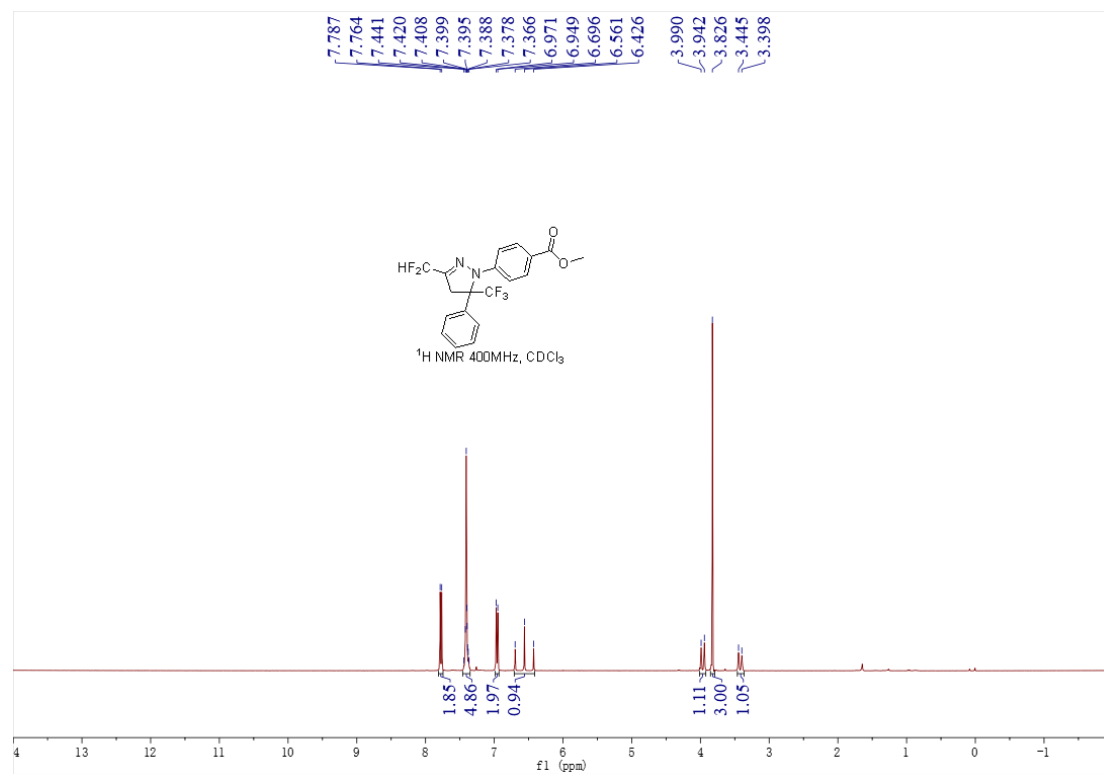

## <sup>13</sup>C NMR copy of compound **4k**

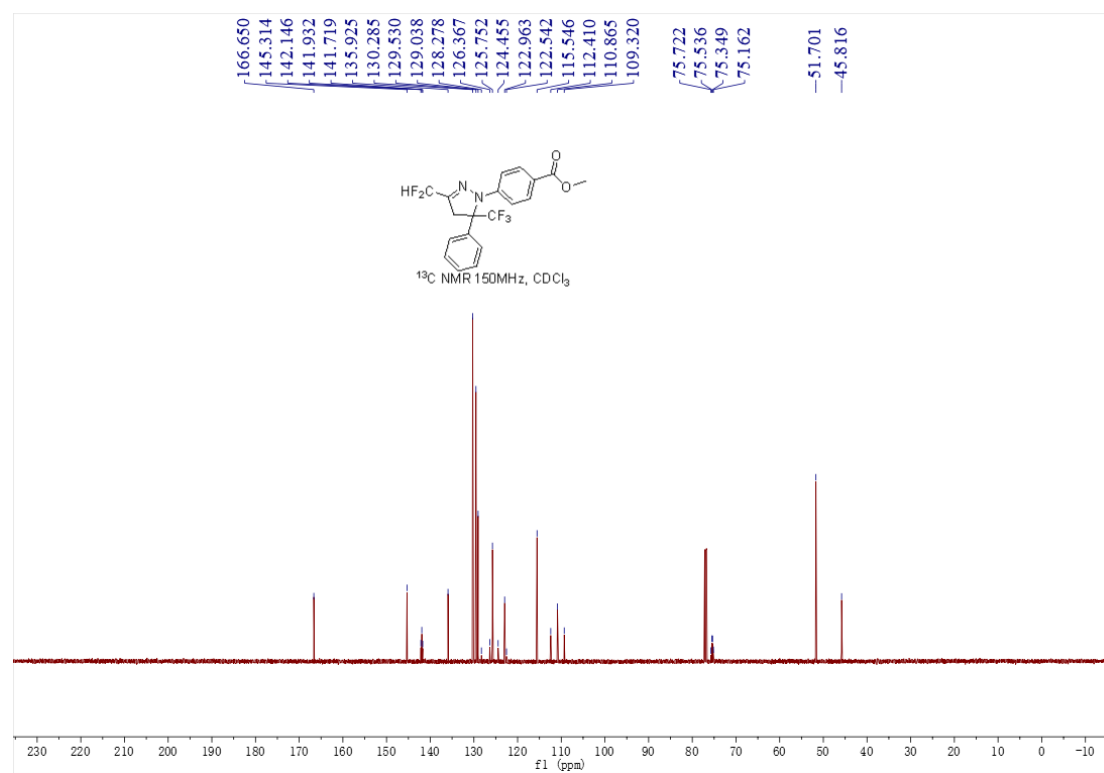

<sup>19</sup>F NMR copy of compound **4k**

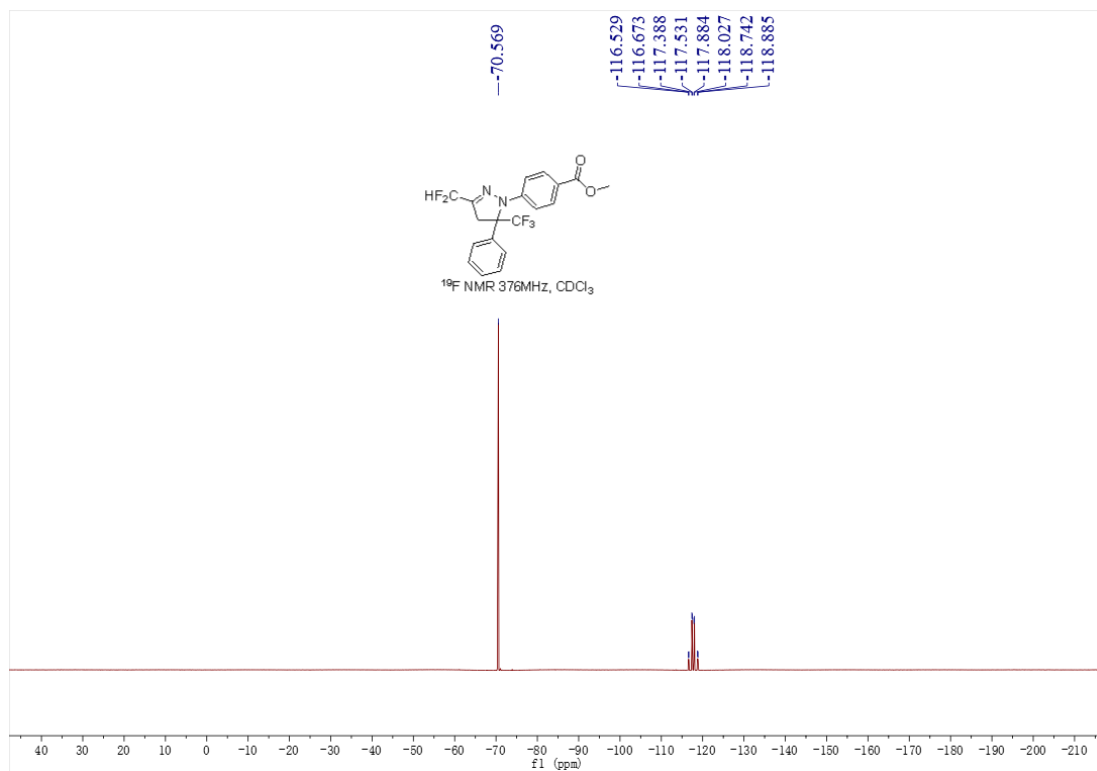

HRMS copy of compound 4k

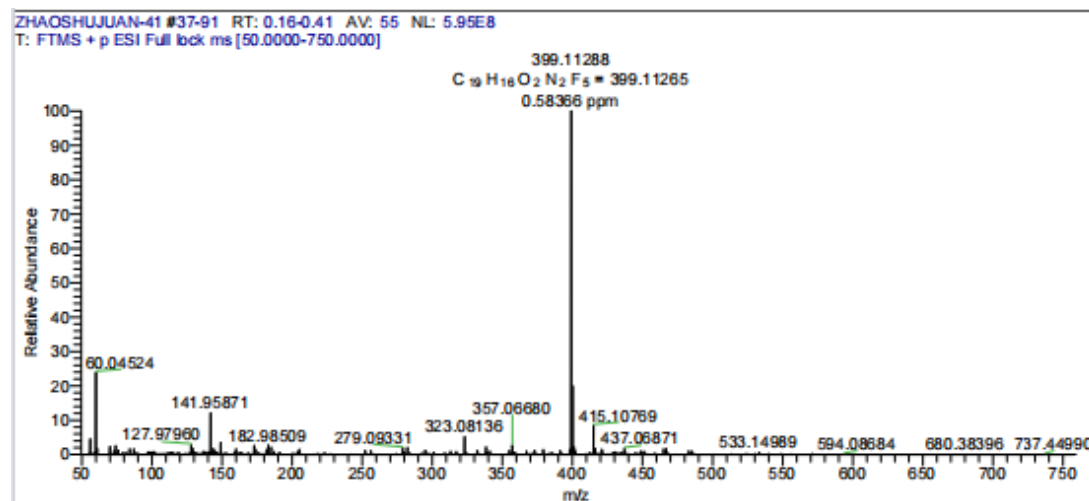

ZHAOSHUJUAN-41#37-91 RT: 0.16-0.41 AV: 55  
T: FTMS + p ESI Full lock ms [50.0000-750.0000]

| m/z       | Intensity   | Relative | Theo. Mass | Delta (ppm) | Composition                                                                  |
|-----------|-------------|----------|------------|-------------|------------------------------------------------------------------------------|
| 60.04524  | 141937632.0 | 23.55    |            |             |                                                                              |
| 141.95871 | 72073048.0  | 11.96    |            |             |                                                                              |
| 399.11288 | 602749760.0 | 100.00   | 399.11265  | 0.23        | C <sub>19</sub> H <sub>16</sub> O <sub>2</sub> N <sub>2</sub> F <sub>5</sub> |
| 400.11614 | 121922736.0 | 20.23    |            |             |                                                                              |
| 415.10769 | 50507616.0  | 8.38     |            |             |                                                                              |

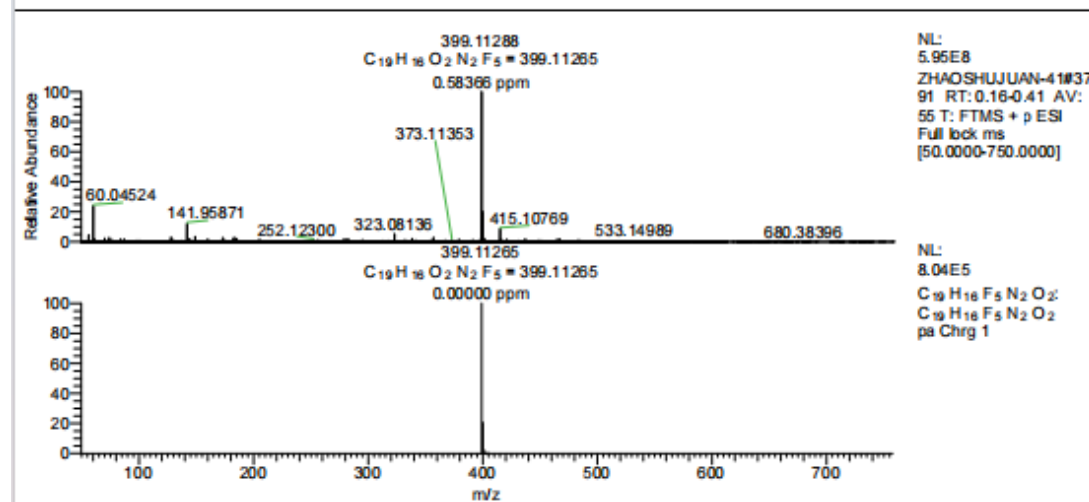

# Spectrogram copies of compound **4l**

## <sup>1</sup>H NMR copy of compound **4l**

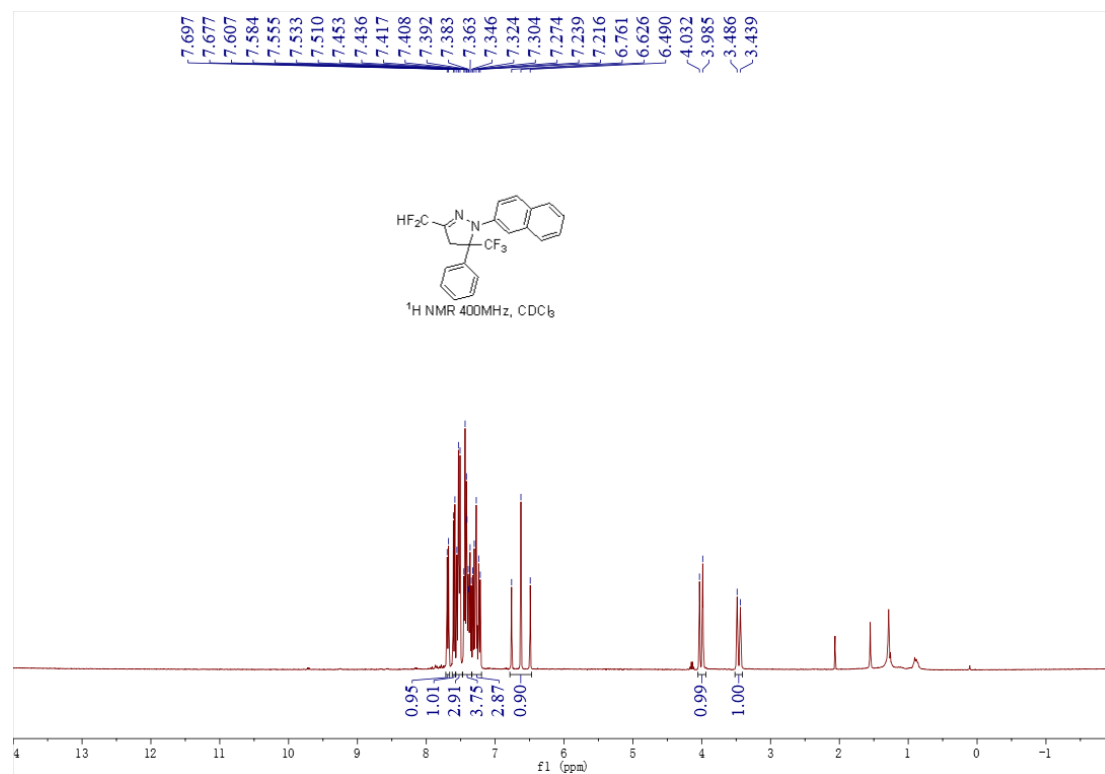

## <sup>13</sup>C NMR copy of compound **4l**

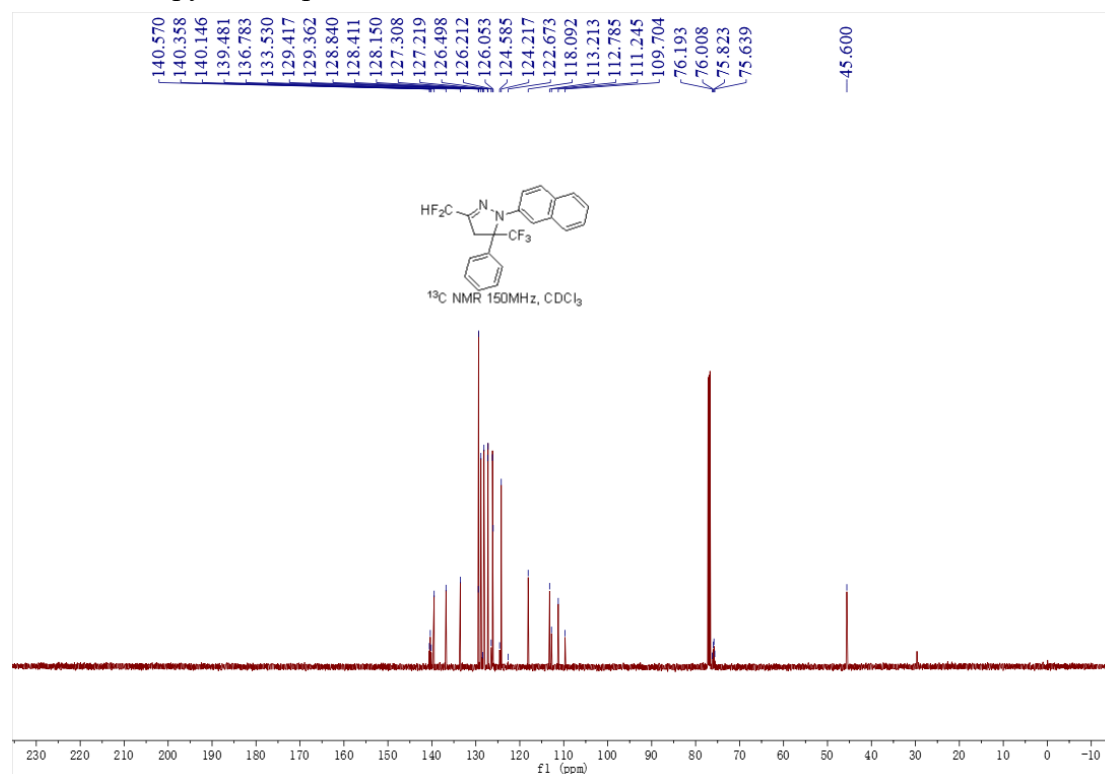

<sup>19</sup>F NMR copy of compound **41**

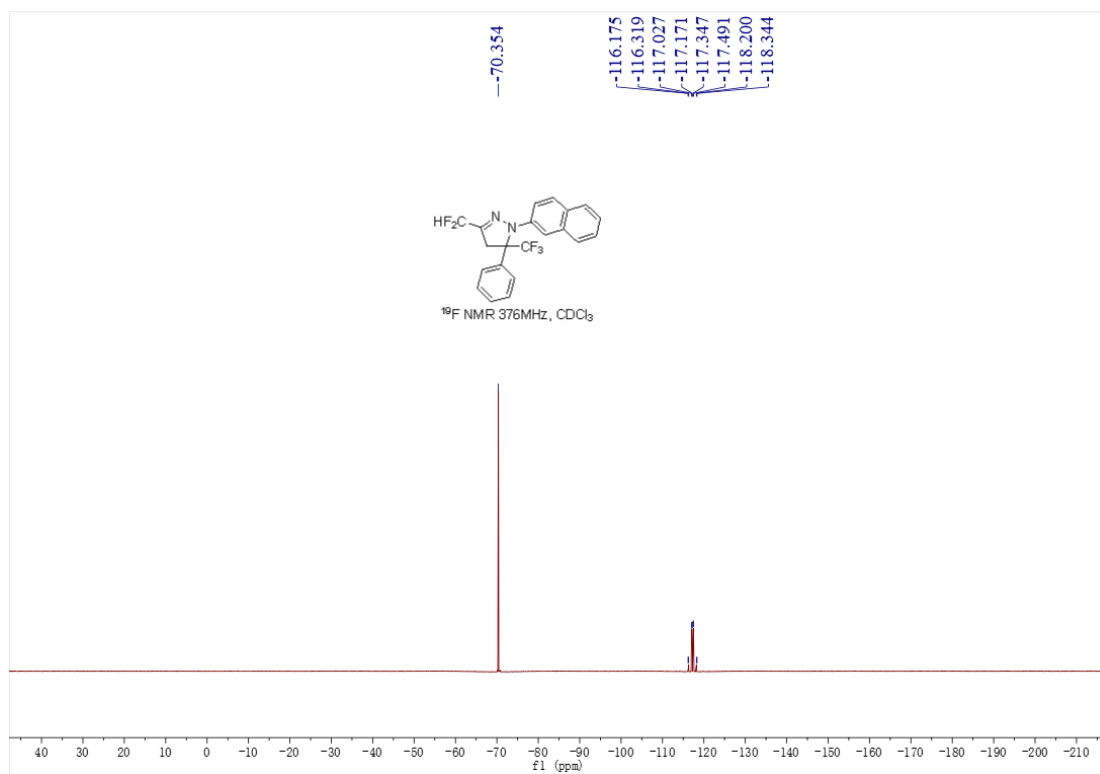

# HRMS copy of compound 4l

ZHAOSHUJUAN-44#24-68 RT: 0.11-0.30 AV: 45 NL: 2.23E5  
T: FTMS + p ESI Full lock ms [50.0000-750.0000]

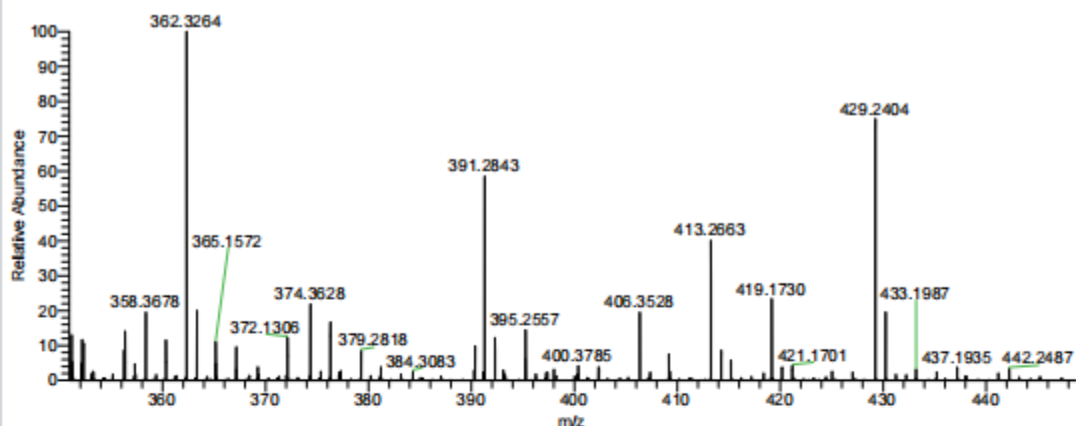

ZHAOSHUJUAN-44#24-68 RT: 0.11-0.30 AV: 45  
T: FTMS + p ESI Full lock ms [50.0000-750.0000]

m/z = 391.0360-391.2080

| m/z      | Intensity | Relative | Theo. Mass | Delta (ppm) | Composition                                                   |
|----------|-----------|----------|------------|-------------|---------------------------------------------------------------|
| 391.1229 | 5243.9    | 100.00   | 391.1228   | 0.12        | C <sub>21</sub> H <sub>16</sub> N <sub>2</sub> F <sub>5</sub> |
| 391.1518 | 2262.2    | 43.14    | 391.1228   | 28.94       | C <sub>21</sub> H <sub>16</sub> N <sub>2</sub> F <sub>5</sub> |
| 391.1629 | 195.8     | 3.73     | 391.1228   | 40.12       | C <sub>21</sub> H <sub>16</sub> N <sub>2</sub> F <sub>5</sub> |

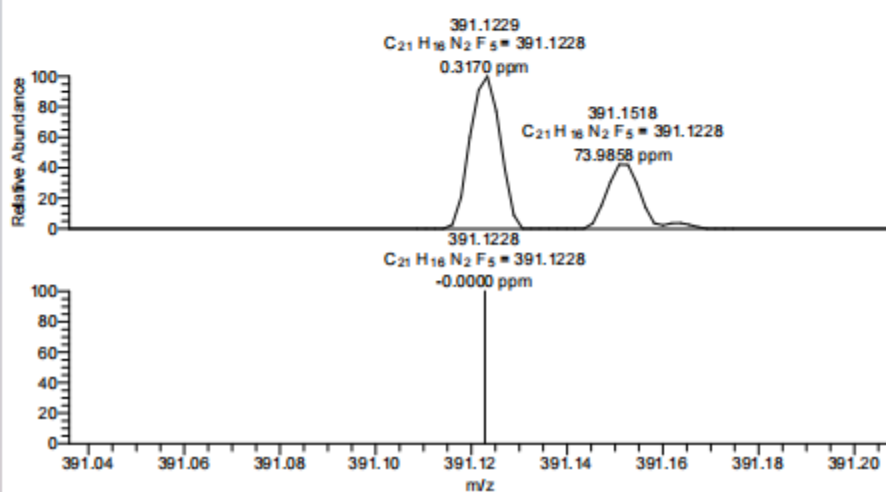

NL:  
5.20E3  
ZHAOSHUJUAN-44#24-  
68 RT: 0.11-0.30 AV:  
45 T: FTMS + p ESI  
Full lock ms  
[50.0000-750.0000]

NL:  
7.90E5  
C<sub>21</sub>H<sub>16</sub>F<sub>5</sub>N<sub>2</sub>:  
C<sub>21</sub>H<sub>16</sub>F<sub>5</sub>N<sub>2</sub>  
pa Chrg 1

Spectrogram copies of compound **4a'**

$^1\text{H}$  NMR copy of compound **4a'**

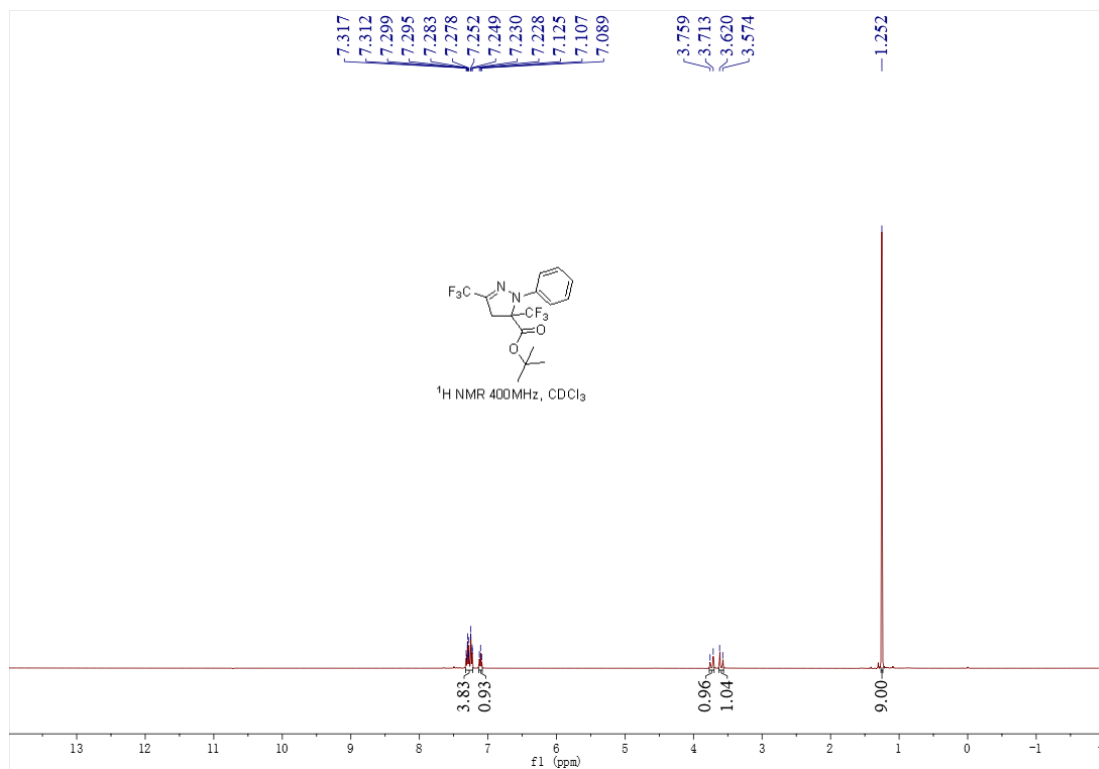

$^{13}\text{C}$  NMR copy of compound **4a'**

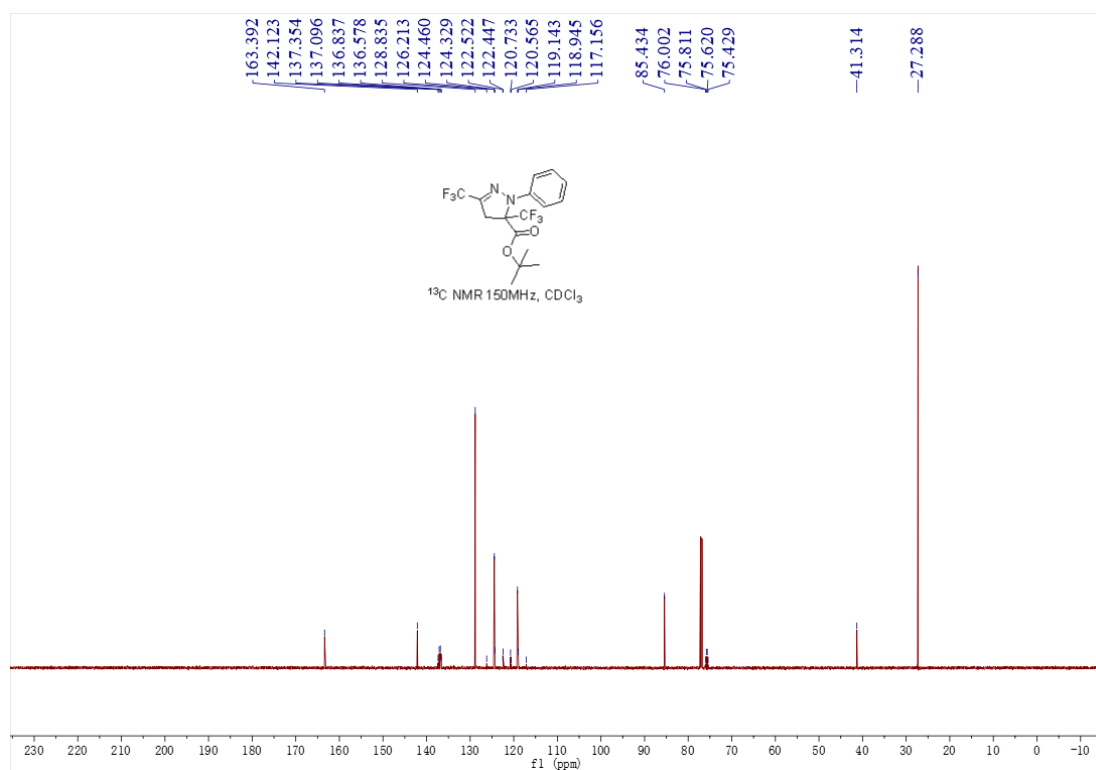

<sup>19</sup>F NMR copy of compound **4a'**

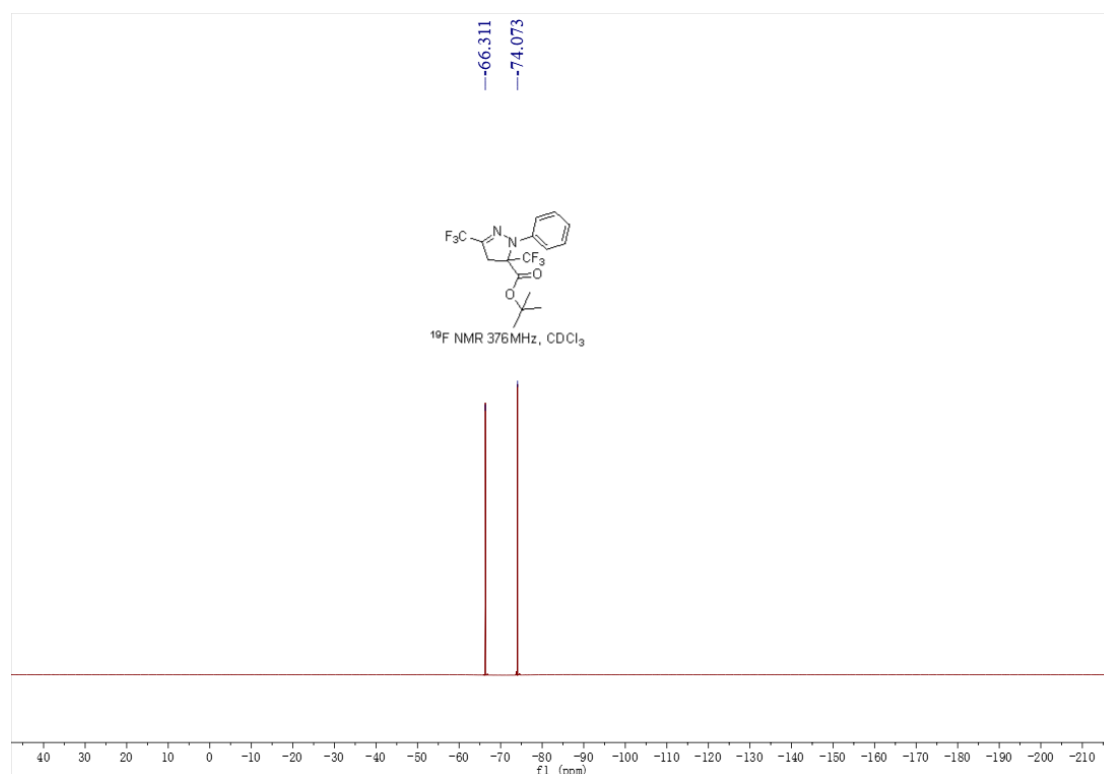

HRMS copy of compound **4a'**

Mass Spectrum SmartFormula Report

|                      |                                              |                   |                   |
|----------------------|----------------------------------------------|-------------------|-------------------|
| <b>Analysis Info</b> |                                              | Acquisition Date  | 2024-2-5 10:31:42 |
| Analysis Name        | D:\Data\user\NWNWU-wangruikang 20240205-32.d | Operator          | Huyue             |
| Method               | tune_low.m                                   | Instrument / Ser# | micrOTOF-Q 20453  |
| Sample Name          | 32                                           |                   |                   |
| Comment              |                                              |                   |                   |

|                              |          |                       |           |                  |           |
|------------------------------|----------|-----------------------|-----------|------------------|-----------|
| <b>Acquisition Parameter</b> |          | Ion Polarity          | Positive  | Set Nebulizer    | 0.4 Bar   |
| Source Type                  | ESI      | Set Capillary         | 4500 V    | Set Dry Heater   | 180 j°C   |
| Focus                        | Active   | Set End Plate Offset  | -500 V    | Set Dry Gas      | 4.0 l/min |
| Scan Begin                   | 100 m/z  | Set Collision Cell RF | 400.0 Vpp | Set Divert Valve | Waste     |
| Scan End                     | 1000 m/z |                       |           |                  |           |

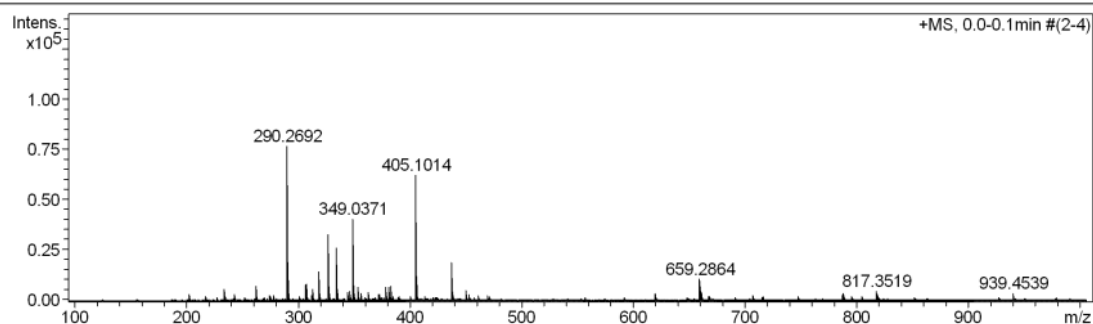

| Meas. #  | Formula                                                                          | m/z      | err [ppm] | Me an err [ppm] | rd b | N- R ul f e | e j % Con | mSi gm a | Std l | St d Me an m/ z | Std Var m Nor m Dif | Std l m/ z | Std d f | Std Com b Dev |
|----------|----------------------------------------------------------------------------------|----------|-----------|-----------------|------|-------------|-----------|----------|-------|-----------------|---------------------|------------|---------|---------------|
| 405.1014 | 1 C <sub>16</sub> H <sub>16</sub> F <sub>6</sub> N <sub>2</sub> NaO <sub>2</sub> | 405.1008 | -1.4      | -0.9            | 6.5  | ok          | even      | 13.7     | 21.3  | 0.5             | 14.6                | 1.1        | 842.7   |               |



Spectrogram copies of compound **4b'**

$^1\text{H}$  NMR copy of compound **4b'**

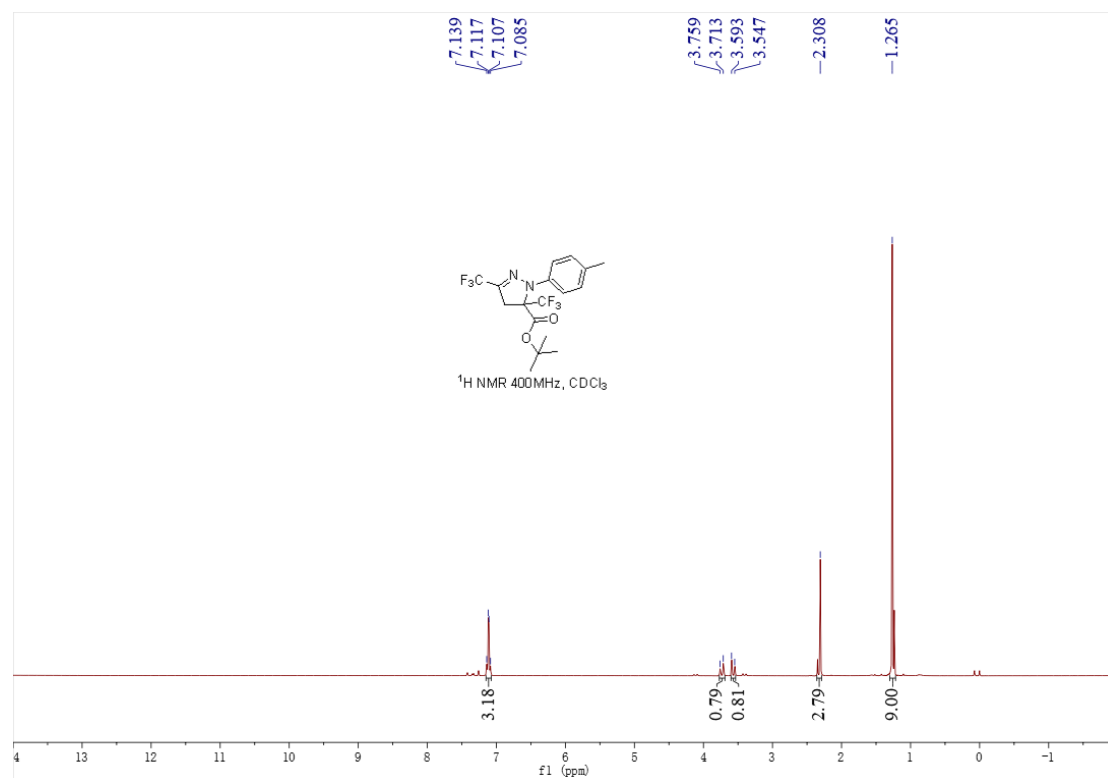

$^{13}\text{C}$  NMR copy of compound **4b'**

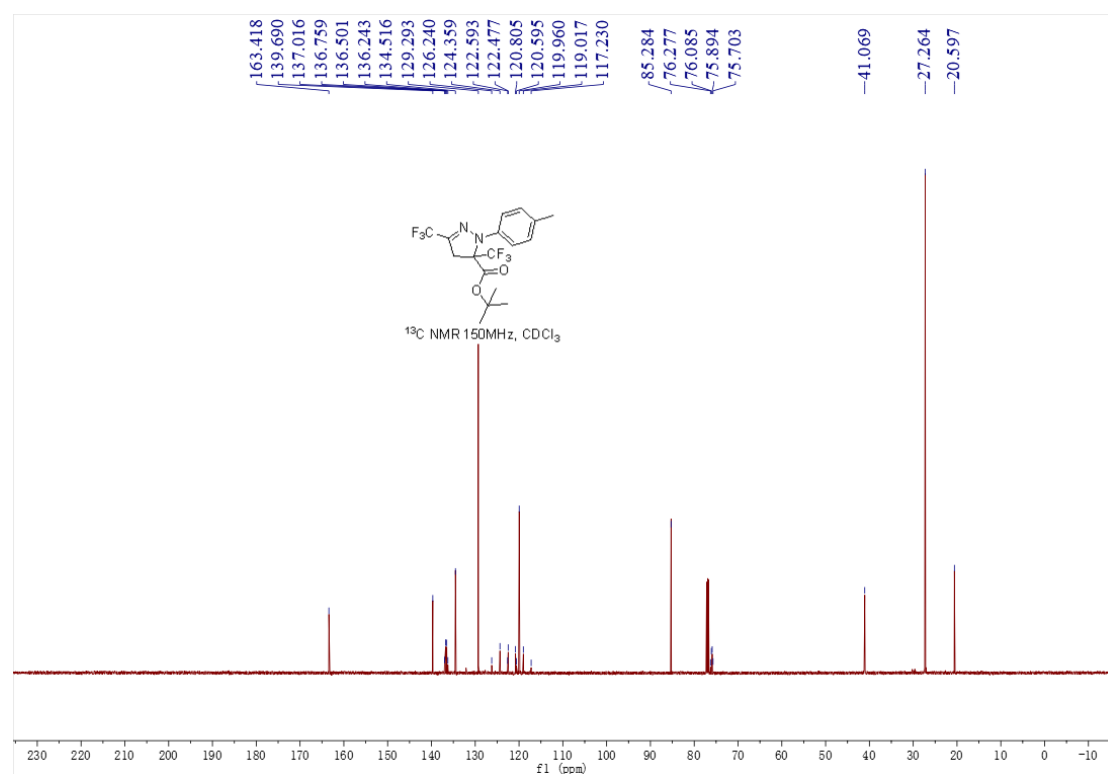

<sup>19</sup>F NMR copy of compound **4b'**

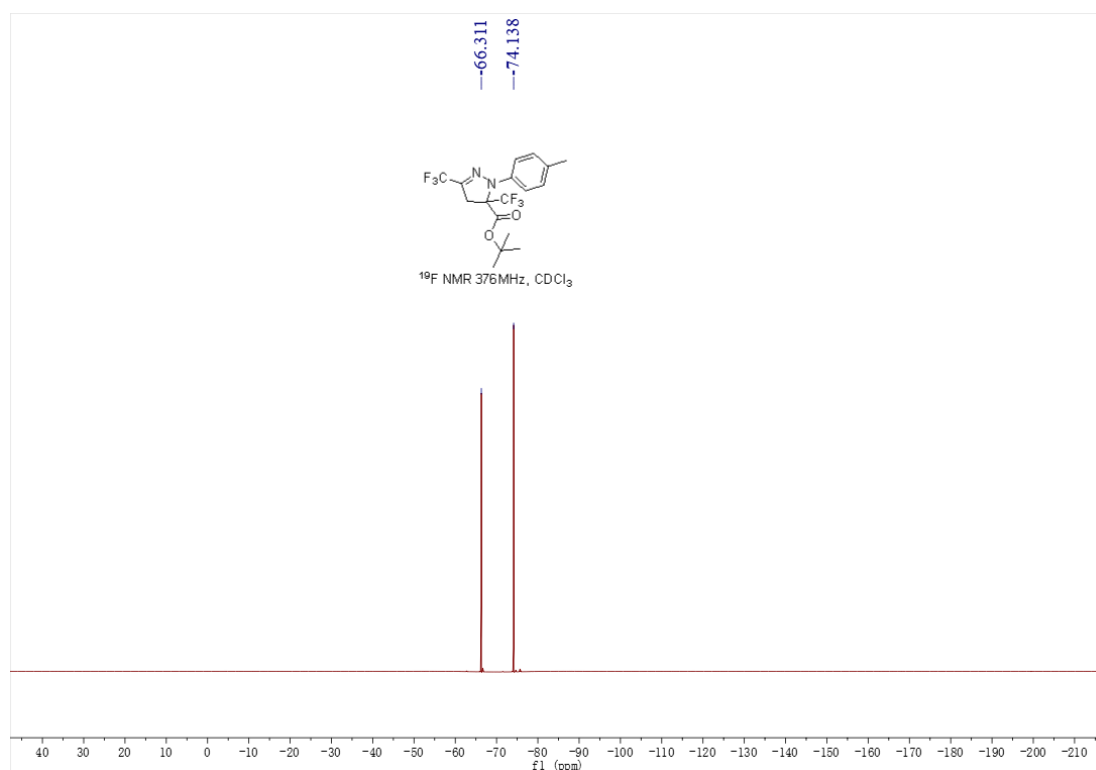

HRMS copy of compound **4b'**

Mass Spectrum SmartFormula Report

| Analysis Info |                                              | Acquisition Date                   |
|---------------|----------------------------------------------|------------------------------------|
| Analysis Name | D:\Data\user\NWNWU-wangruikang 20240205-30.d | 2024-2-5 10:29:09                  |
| Method        | tune_low.m                                   | Operator Huyue                     |
| Sample Name   | 30                                           | Instrument / Ser# micrOTOF-Q 20453 |
| Comment       |                                              |                                    |

| Acquisition Parameter |          |                       |           |                  |           |
|-----------------------|----------|-----------------------|-----------|------------------|-----------|
| Source Type           | ESI      | Ion Polarity          | Positive  | Set Nebulizer    | 0.4 Bar   |
| Focus                 | Active   | Set Capillary         | 4500 V    | Set Dry Heater   | 180 j̄C   |
| Scan Begin            | 100 m/z  | Set End Plate Offset  | -500 V    | Set Dry Gas      | 4.0 l/min |
| Scan End              | 1000 m/z | Set Collision Cell RF | 400.0 Vpp | Set Divert Valve | Waste     |

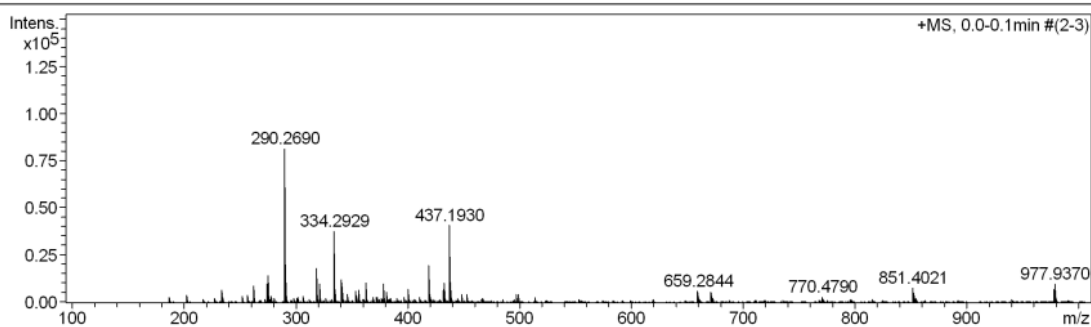

| Meas. #  | Formula                                                                          | m/z      | err [ppm] | Me an err [ppm] | rd b | N- R ul f e | e j % Con | mSi gm a | Std l | St d Me an m/z | Std Var Nor m | St d m/ Dif f | Std Com b Dev |
|----------|----------------------------------------------------------------------------------|----------|-----------|-----------------|------|-------------|-----------|----------|-------|----------------|---------------|---------------|---------------|
| 419.1168 | 1 C <sub>17</sub> H <sub>18</sub> F <sub>6</sub> N <sub>2</sub> NaO <sub>2</sub> | 419.1165 | -0.9      | -0.3            | 6.5  | ok          | even      | 32.6     | 53.1  | 0.5            | 24.9          | 1.2           | 842.7         |

Spectrogram copies of compound **4c'**

$^1\text{H}$  NMR copy of compound **4c'**

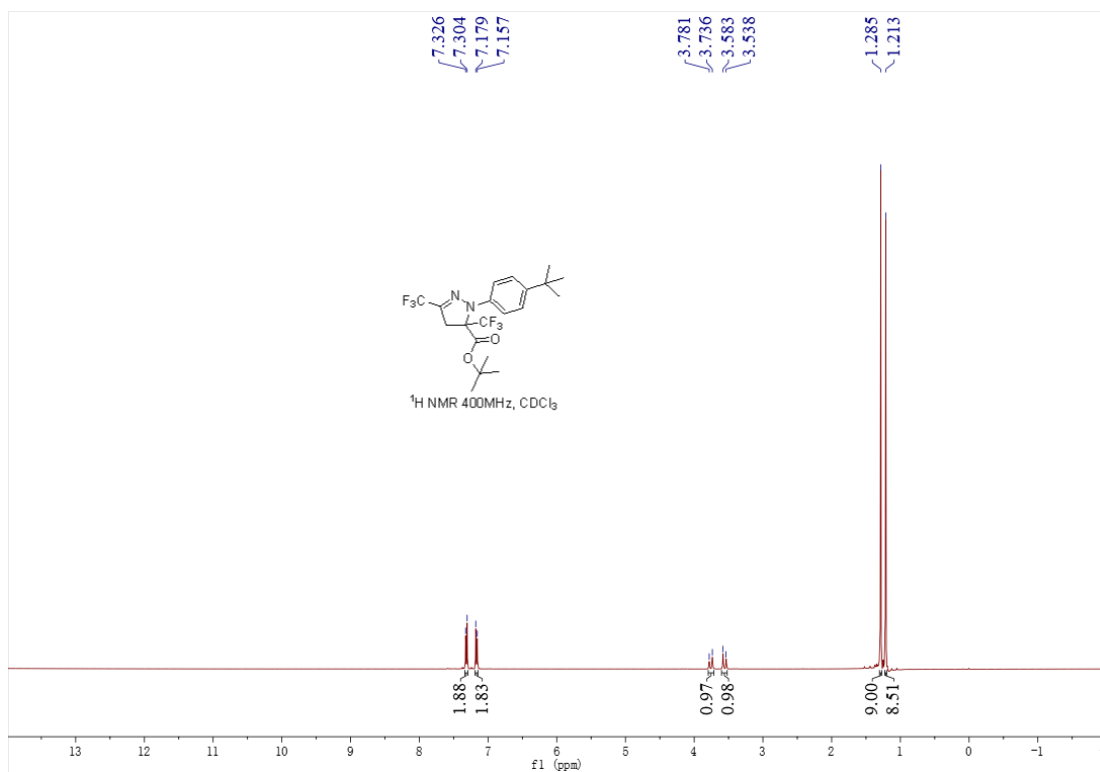

$^{13}\text{C}$  NMR copy of compound **4c'**

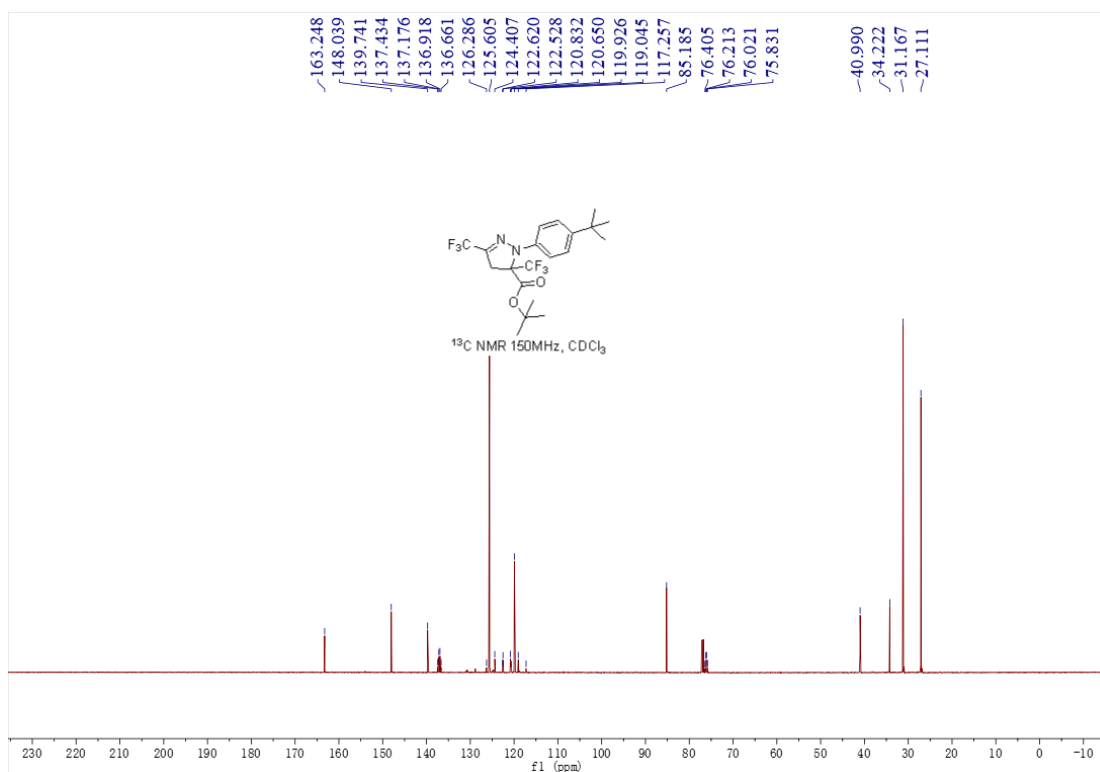

<sup>19</sup>F NMR copy of compound **4c'**

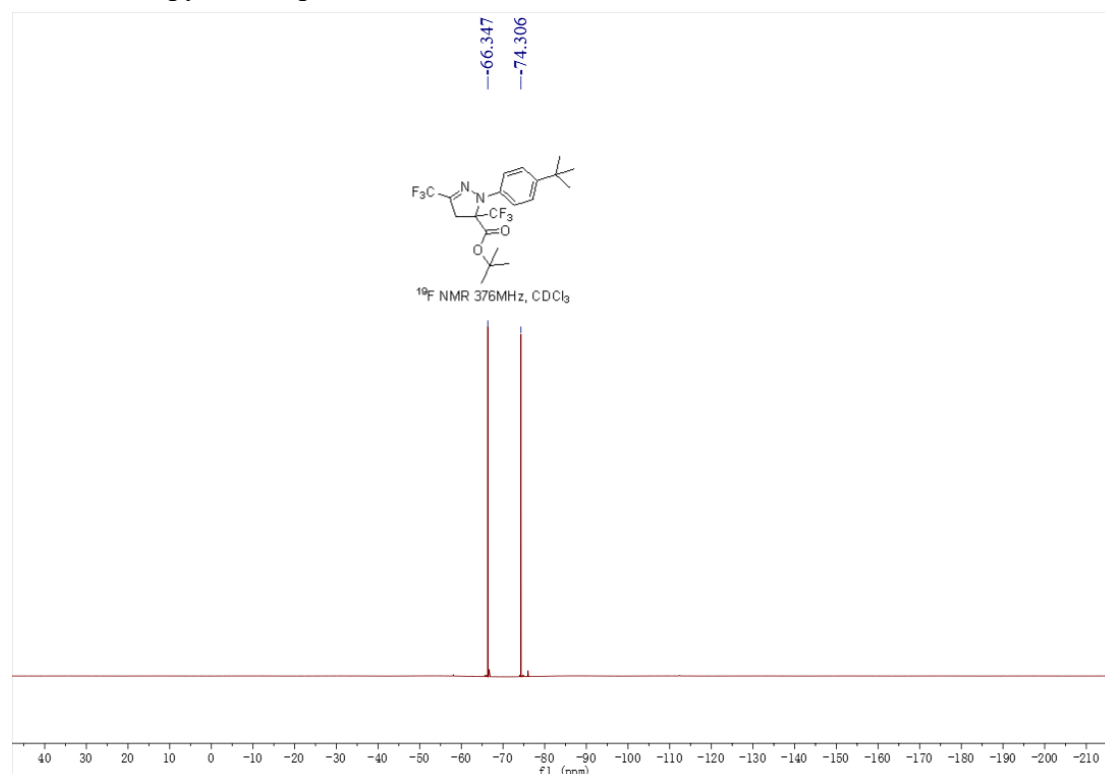

HRMS copy of compound **4c'**

Mass Spectrum SmartFormula Report

Analysis Info

Analysis Name D:\Data\user\NWNWU-wangruikang 20240205-21.d  
 Method tune\_low.m  
 Sample Name 21  
 Comment

Acquisition Date 2024-2-5 10:14:12

Operator Huyue  
 Instrument / Ser# micrOTOF-Q 20453

Acquisition Parameter

|             |          |                       |           |                  |           |
|-------------|----------|-----------------------|-----------|------------------|-----------|
| Source Type | ESI      | Ion Polarity          | Positive  | Set Nebulizer    | 0.4 Bar   |
| Focus       | Active   | Set Capillary         | 4500 V    | Set Dry Heater   | 180 j°C   |
| Scan Begin  | 100 m/z  | Set End Plate Offset  | -500 V    | Set Dry Gas      | 4.0 l/min |
| Scan End    | 1000 m/z | Set Collision Cell RF | 300.0 Vpp | Set Divert Valve | Waste     |

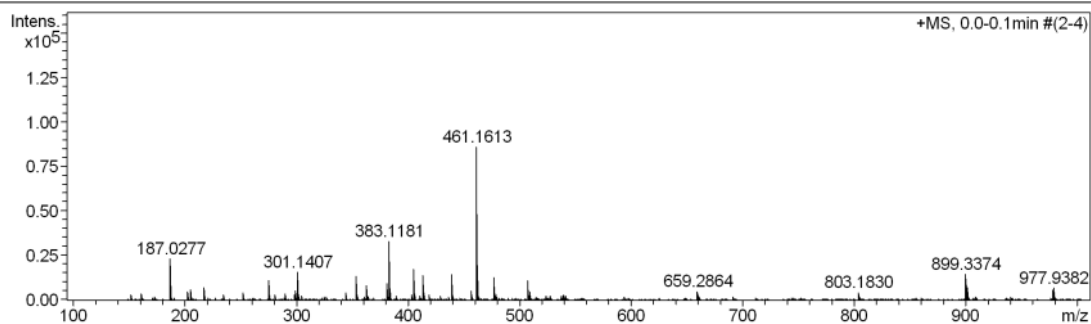

| Meas. #  | m/z | Formula                                                                        | m/z      | err [ppm] | Me an err [ppm] | rdb | N-R | ej% Conf | mS  | Std | Std | Std | Std | Std   |
|----------|-----|--------------------------------------------------------------------------------|----------|-----------|-----------------|-----|-----|----------|-----|-----|-----|-----|-----|-------|
|          |     |                                                                                |          |           |                 |     |     |          |     |     |     |     |     |       |
| 461.1613 | 1   | C <sub>20</sub> H <sub>24</sub> F <sub>6</sub> N <sub>2</sub> NaO <sub>2</sub> | 461.1634 | 4.6       | 3.5             | 6.5 | ok  | even     | 2.7 | 4.6 | 2.0 | 1.9 | 2.0 | 842.7 |

Spectrogram copies of compound **4d'**

$^1\text{H}$  NMR copy of compound **4d'**

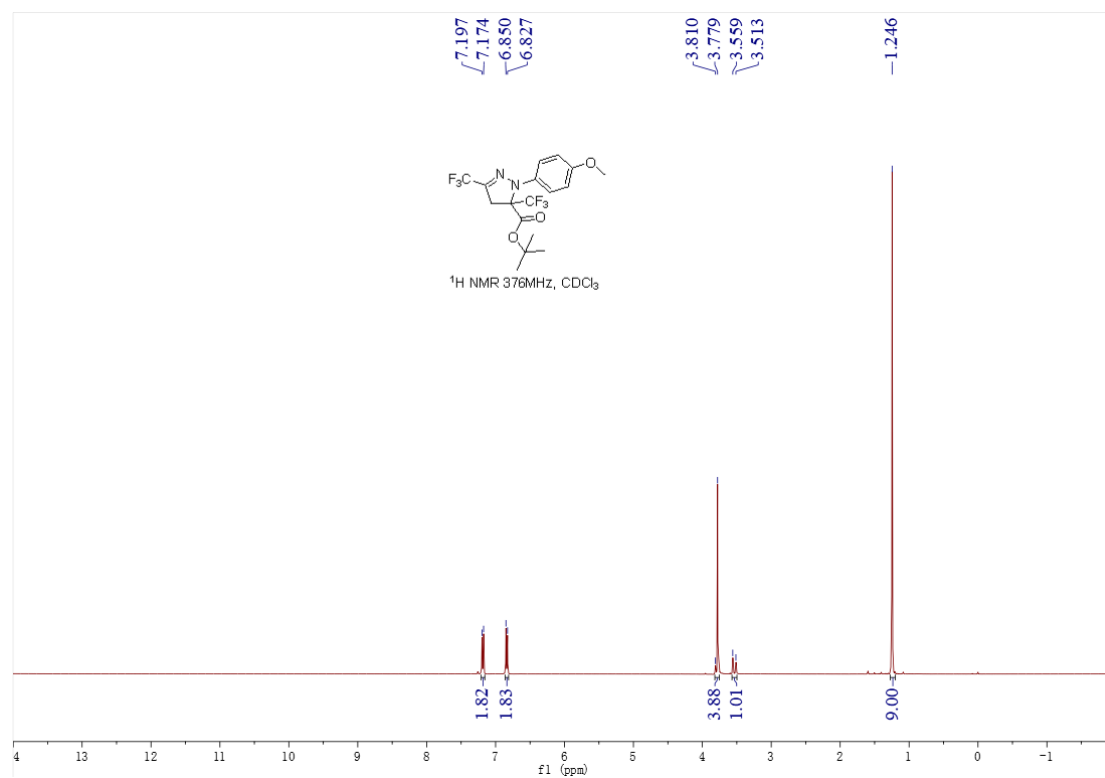

$^{13}\text{C}$  NMR copy of compound **4d'**

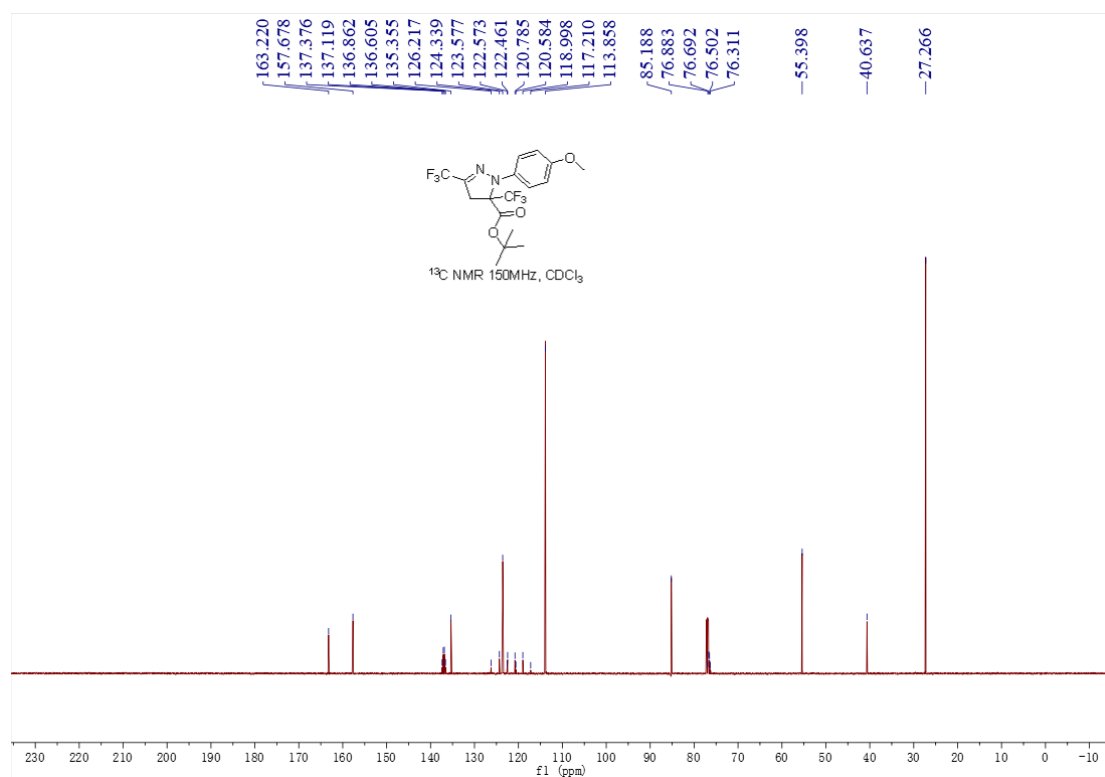

<sup>19</sup>F NMR copy of compound **4d'**

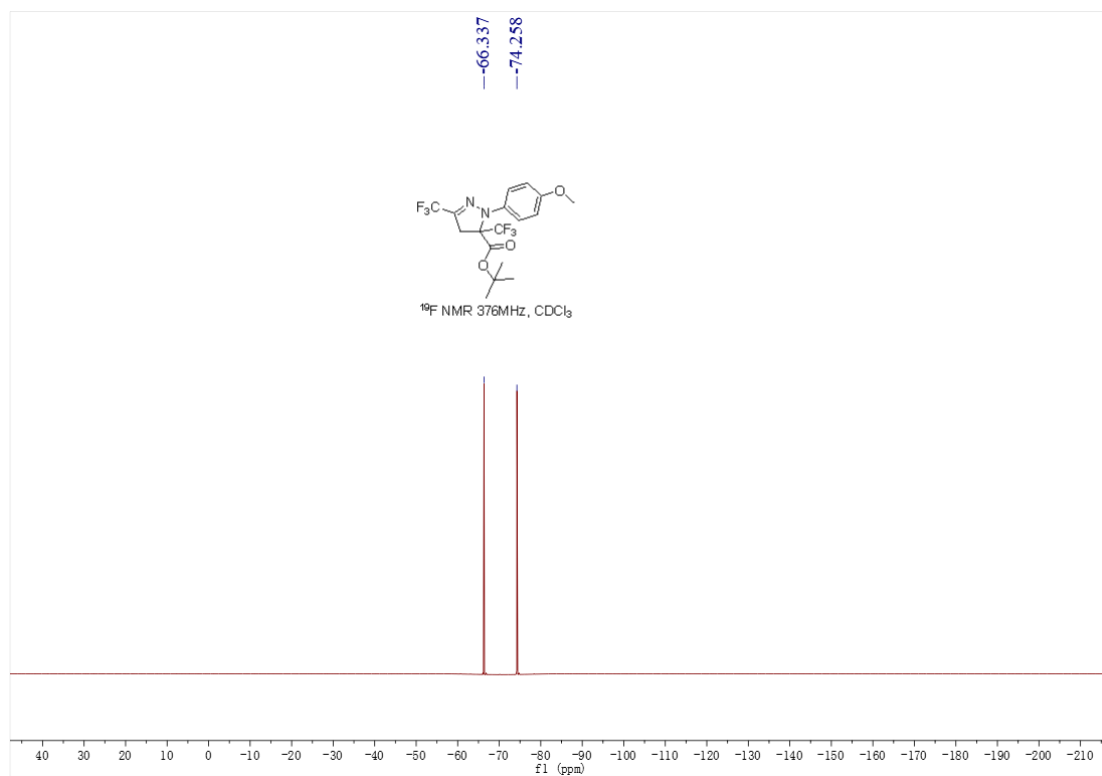

HRMS copy of compound **4d'**

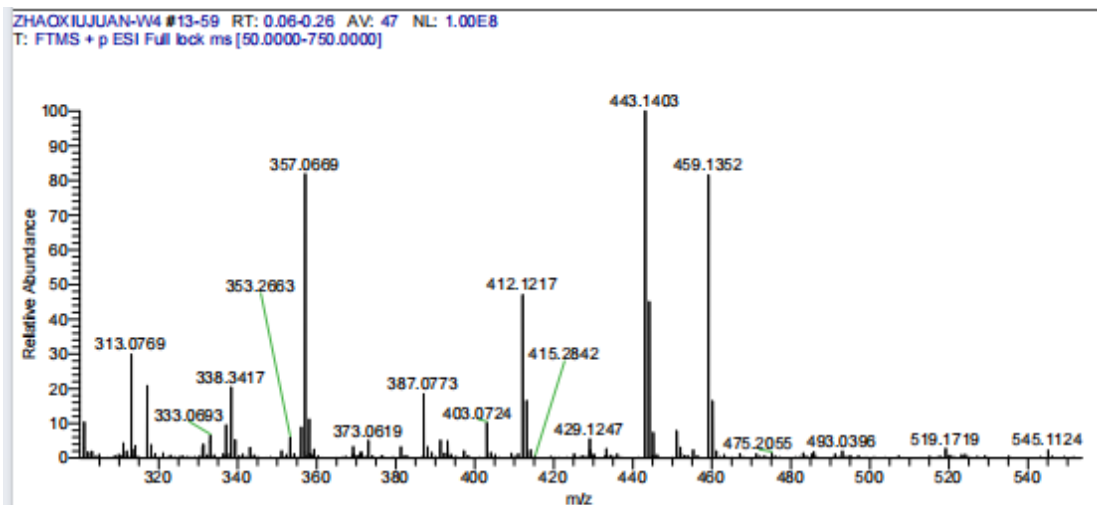

ZHAOXIUJUAN-W4#13-59 RT: 0.06-0.26 AV: 47  
T: FTMS + p ESI Full lock ms [50.0000-750.0000]  
m/z= 412.1380-414.0835

| m/z      | Intensity  | Relative | Theo. Mass | Delta (ppm) | Composition                                                                  |
|----------|------------|----------|------------|-------------|------------------------------------------------------------------------------|
| 413.0257 | 7711.2     | 0.05     | 413.1294   | -103.69     | C <sub>17</sub> H <sub>19</sub> O <sub>3</sub> N <sub>2</sub> F <sub>6</sub> |
| 413.0607 | 5299.9     | 0.03     | 413.1294   | -68.72      | C <sub>17</sub> H <sub>19</sub> O <sub>3</sub> N <sub>2</sub> F <sub>6</sub> |
| 413.1285 | 16494018.0 | 100.00   | 413.1294   | -0.92       | C <sub>17</sub> H <sub>19</sub> O <sub>3</sub> N <sub>2</sub> F <sub>6</sub> |
| 413.1474 | 11668.0    | 0.07     | 413.1294   | 17.96       | C <sub>17</sub> H <sub>19</sub> O <sub>3</sub> N <sub>2</sub> F <sub>6</sub> |
| 413.2664 | 1316181.3  | 7.98     | 413.1294   | 136.94      | C <sub>17</sub> H <sub>19</sub> O <sub>3</sub> N <sub>2</sub> F <sub>6</sub> |

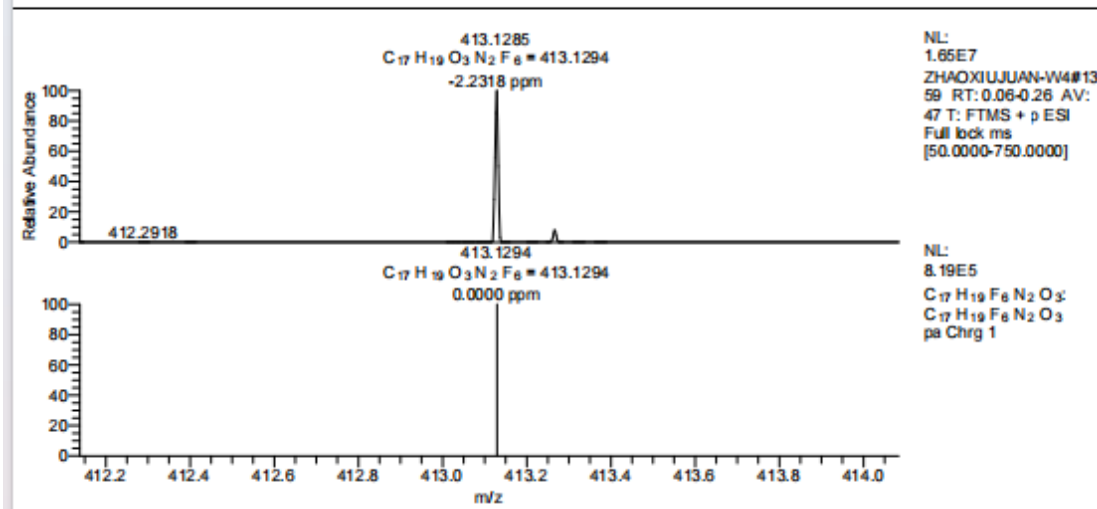

Spectrogram copies of compound **4e'**

$^1\text{H}$  NMR copy of compound **4e'**

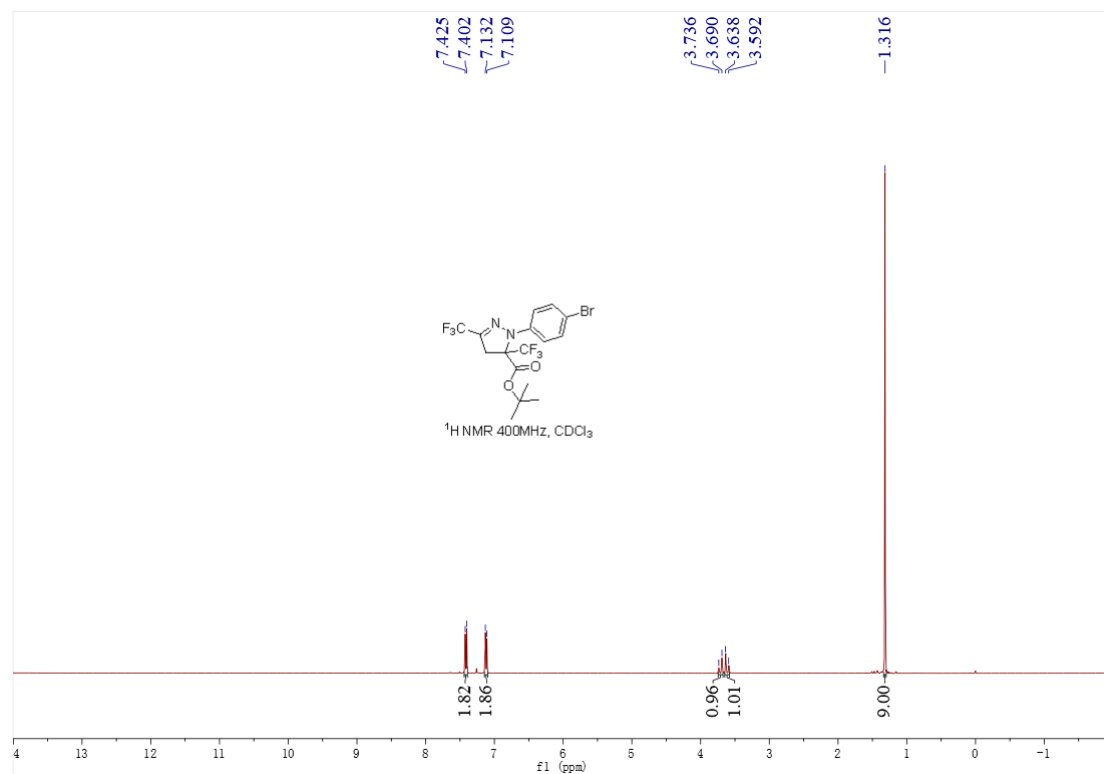

$^{13}\text{C}$  NMR copy of compound **4e'**

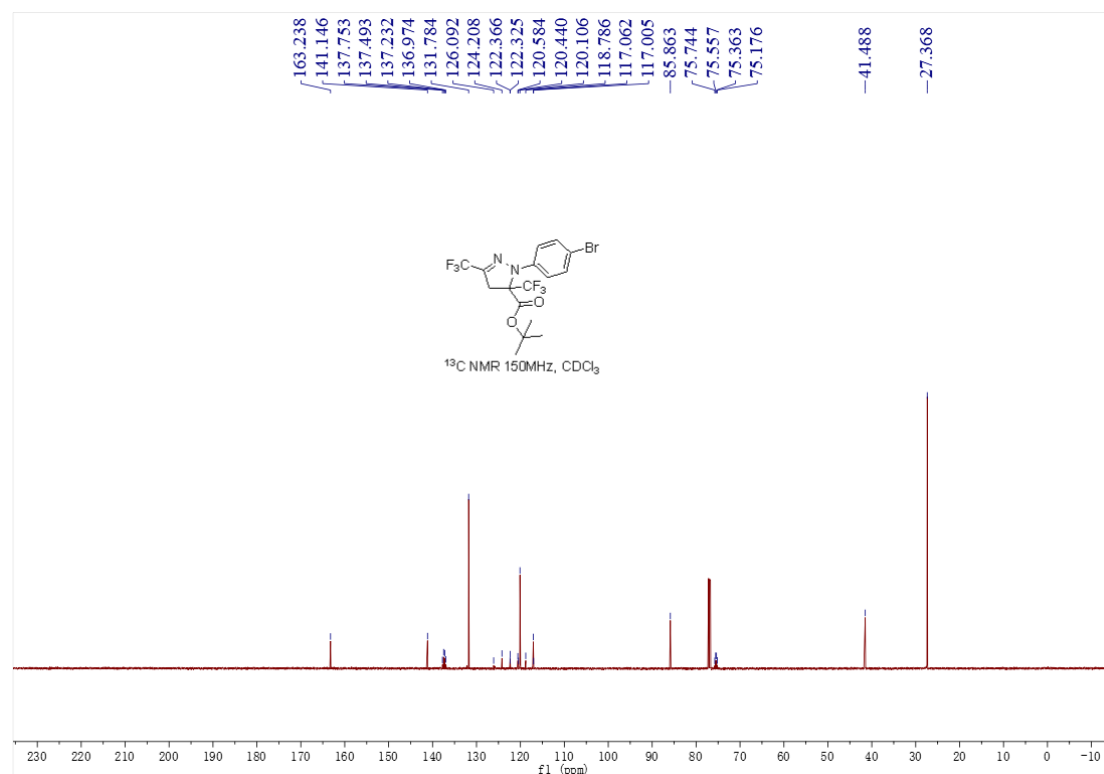



<sup>19</sup>F NMR copy of compound 4e'

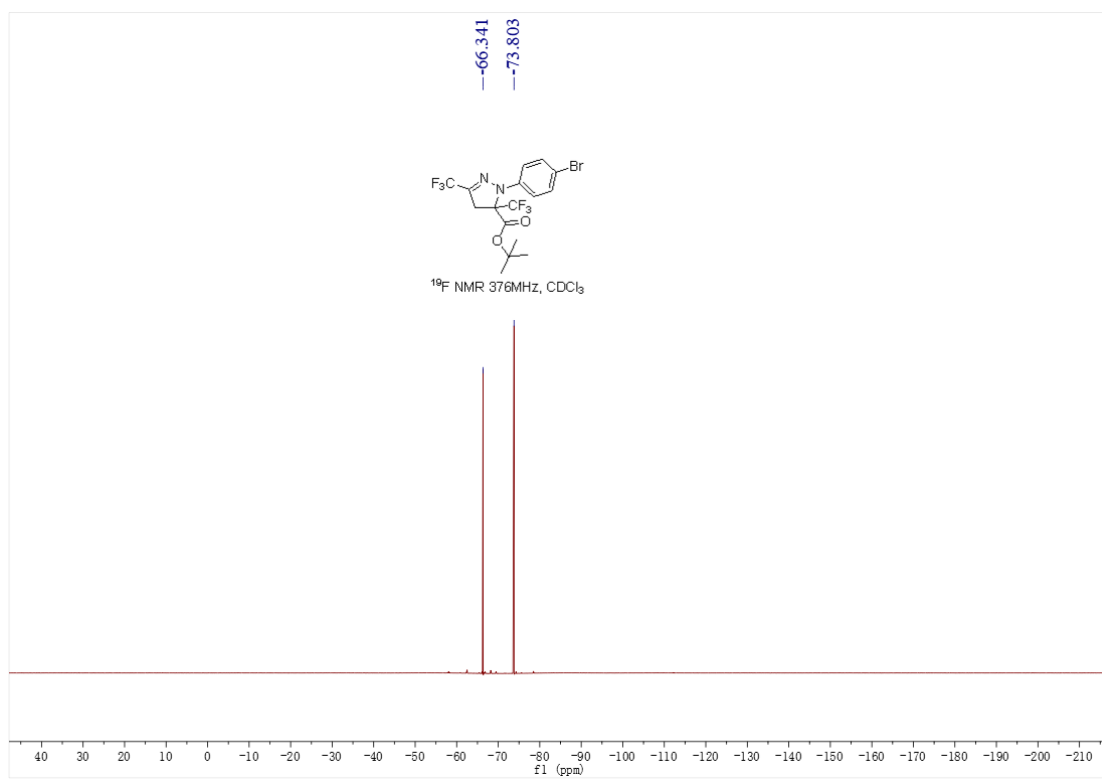

# HRMS copy of compound 4e'

ZHAOXIUJUAN-W7#8-63 RT: 0.04-0.28 AV: 56 NL: 2.28E6  
 T: FTMS + p ESI Full ms [300.0000-750.0000]

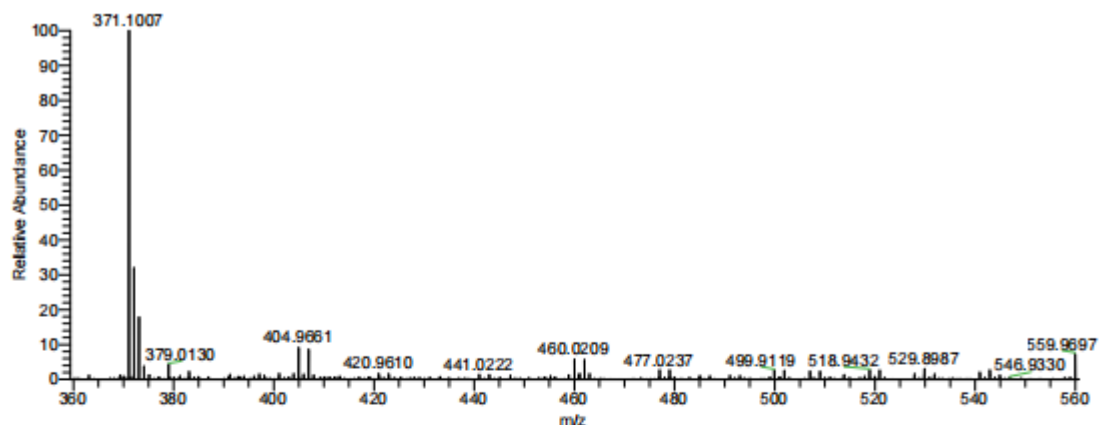

ZHAOXIUJUAN-W7#8-63 RT: 0.04-0.28 AV: 56  
 T: FTMS + p ESI Full ms [300.0000-750.0000]  
 m/z = 458.8151-459.1631

| m/z      | Intensity | Relative | Theo. Mass | Delta (ppm) | Composition                                                                    |
|----------|-----------|----------|------------|-------------|--------------------------------------------------------------------------------|
| 458.8850 | 28625.3   | 100.00   | 459.0137   | -128.71     | C <sub>16</sub> H <sub>14</sub> O <sub>2</sub> N <sub>2</sub> BrF <sub>6</sub> |
| 459.0150 | 2516.9    | 8.79     | 459.0137   | 1.27        | C <sub>16</sub> H <sub>14</sub> O <sub>2</sub> N <sub>2</sub> BrF <sub>6</sub> |
| 459.0380 | 375.5     | 1.31     | 459.0137   | 24.30       | C <sub>16</sub> H <sub>14</sub> O <sub>2</sub> N <sub>2</sub> BrF <sub>6</sub> |
| 459.1190 | 1214.9    | 4.24     | 459.0137   | 105.24      | C <sub>16</sub> H <sub>14</sub> O <sub>2</sub> N <sub>2</sub> BrF <sub>6</sub> |
| 459.1341 | 557.4     | 1.95     | 459.0137   | 120.36      | C <sub>16</sub> H <sub>14</sub> O <sub>2</sub> N <sub>2</sub> BrF <sub>6</sub> |

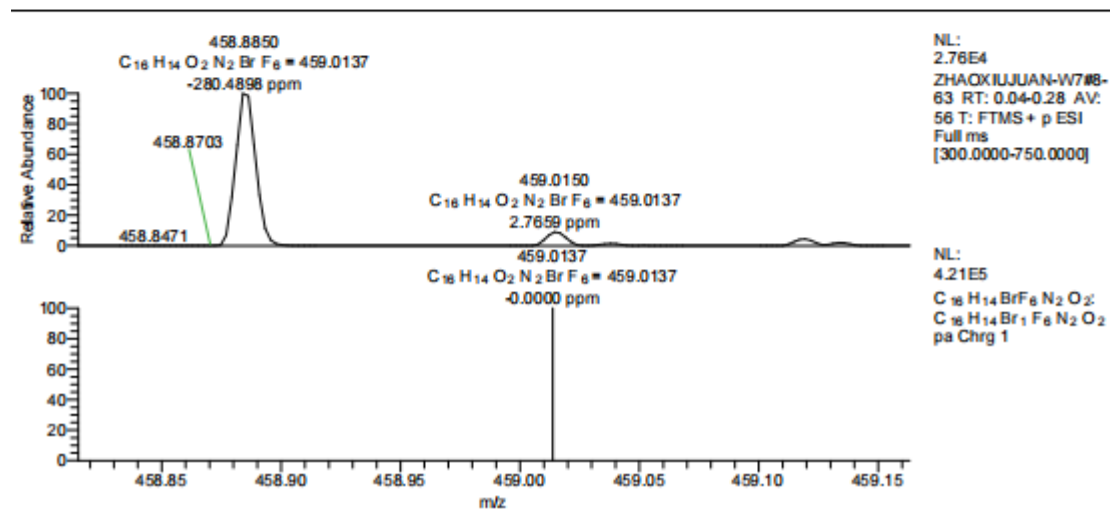

Spectrogram copies of compound **4g'**

<sup>1</sup>H NMR copy of compound **4g'**

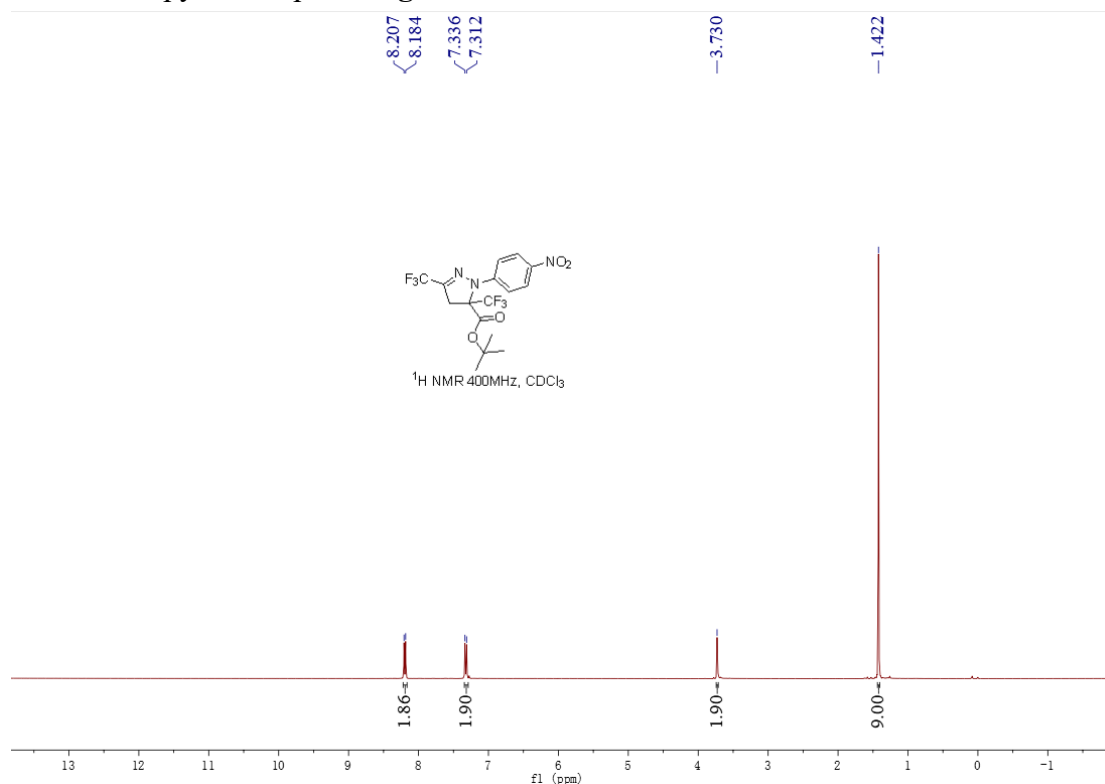

<sup>13</sup>C NMR copy of compound **4g'**

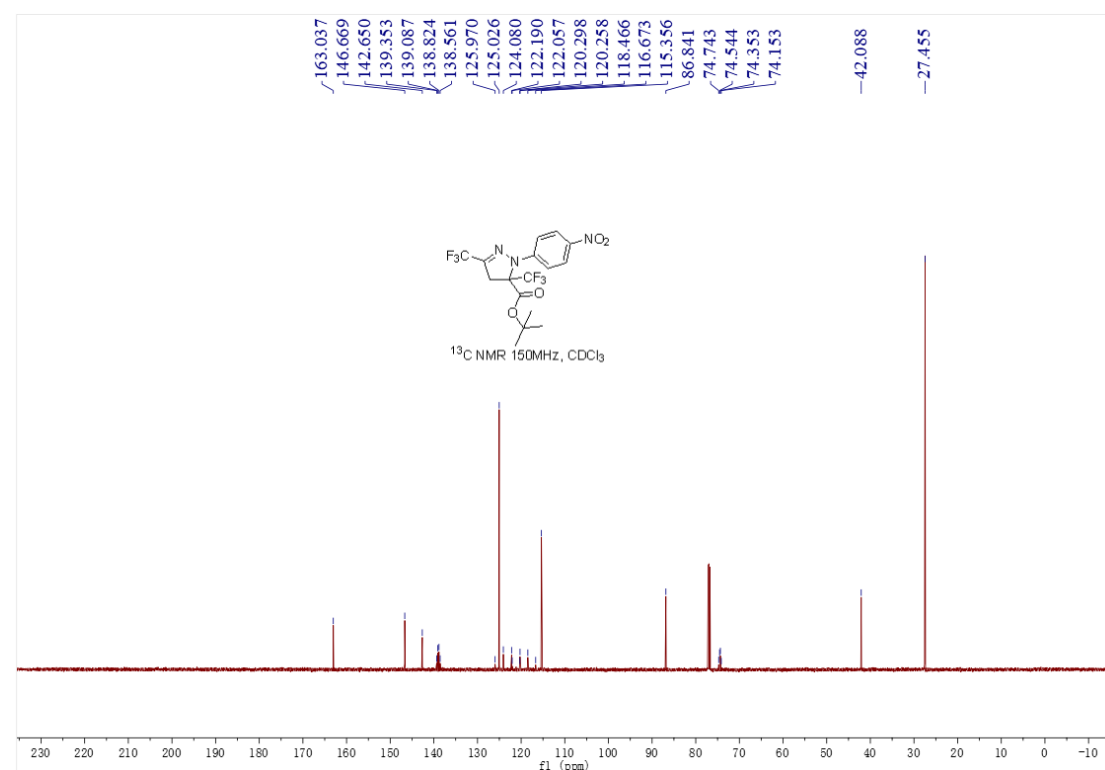

<sup>19</sup>F NMR copy of compound **4g'**

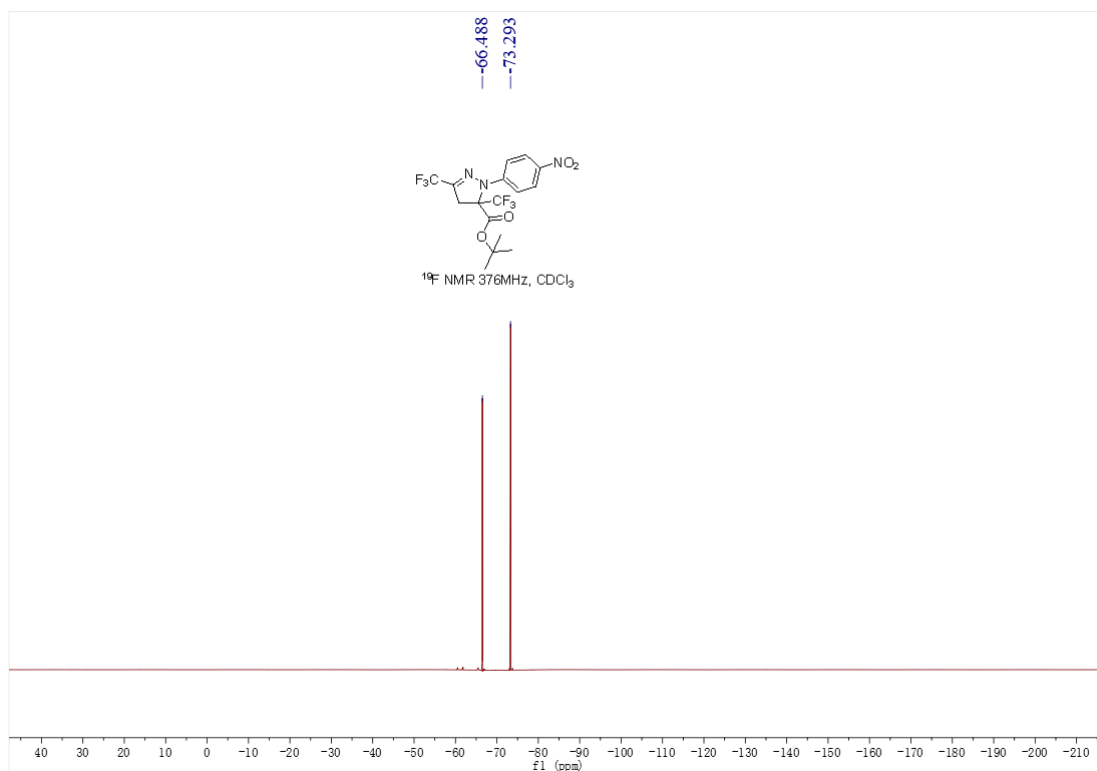

# HRMS copy of compound 4g'

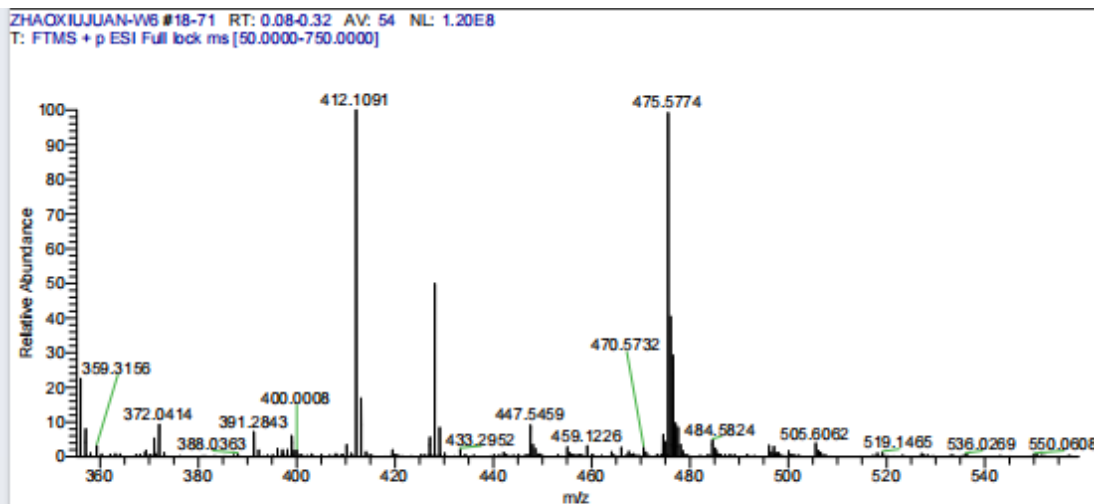

ZHAOXIUJUAN-W6#18-71 RT: 0.08-0.32 AV: 54  
T: FTMS + p ESI Full lock ms [50.0000-750.0000]  
m/z = 416.6898-442.4248

| m/z      | Intensity  | Relative | Theo. Mass | Delta (ppm) | Composition                                                                  |
|----------|------------|----------|------------|-------------|------------------------------------------------------------------------------|
| 419.5143 | 2368459.0  | 3.85     |            |             |                                                                              |
| 427.0965 | 6849721.5  | 11.12    |            |             |                                                                              |
| 428.1042 | 61583512.0 | 100.00   | 428.1040   | 0.25        | C <sub>16</sub> H <sub>16</sub> O <sub>4</sub> N <sub>3</sub> F <sub>6</sub> |
| 429.1078 | 10322933.0 | 16.76    |            |             |                                                                              |
| 433.2952 | 2611551.0  | 4.24     |            |             |                                                                              |

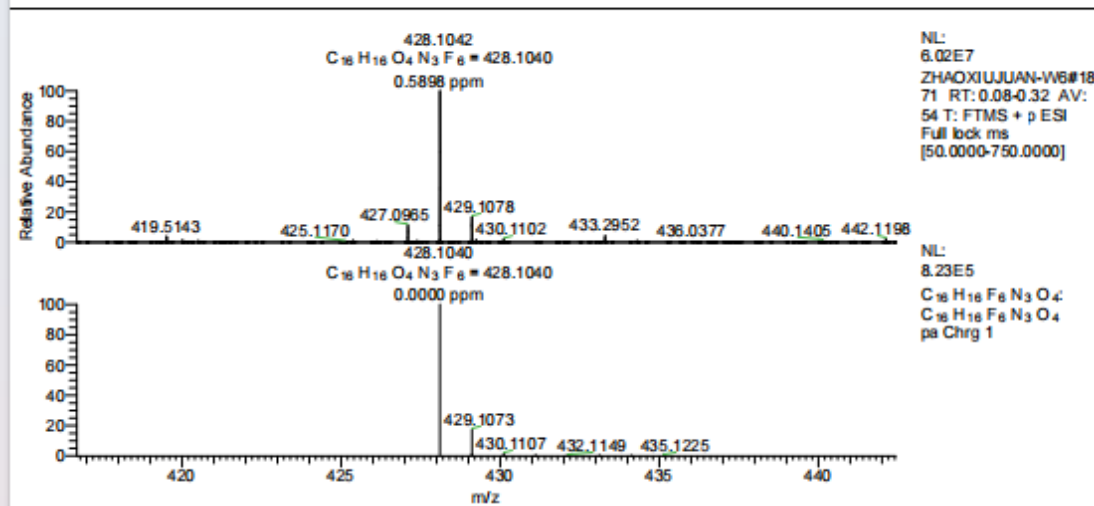

Spectrogram copies of compound **4h'**

<sup>1</sup>H NMR copy of compound **4h'**

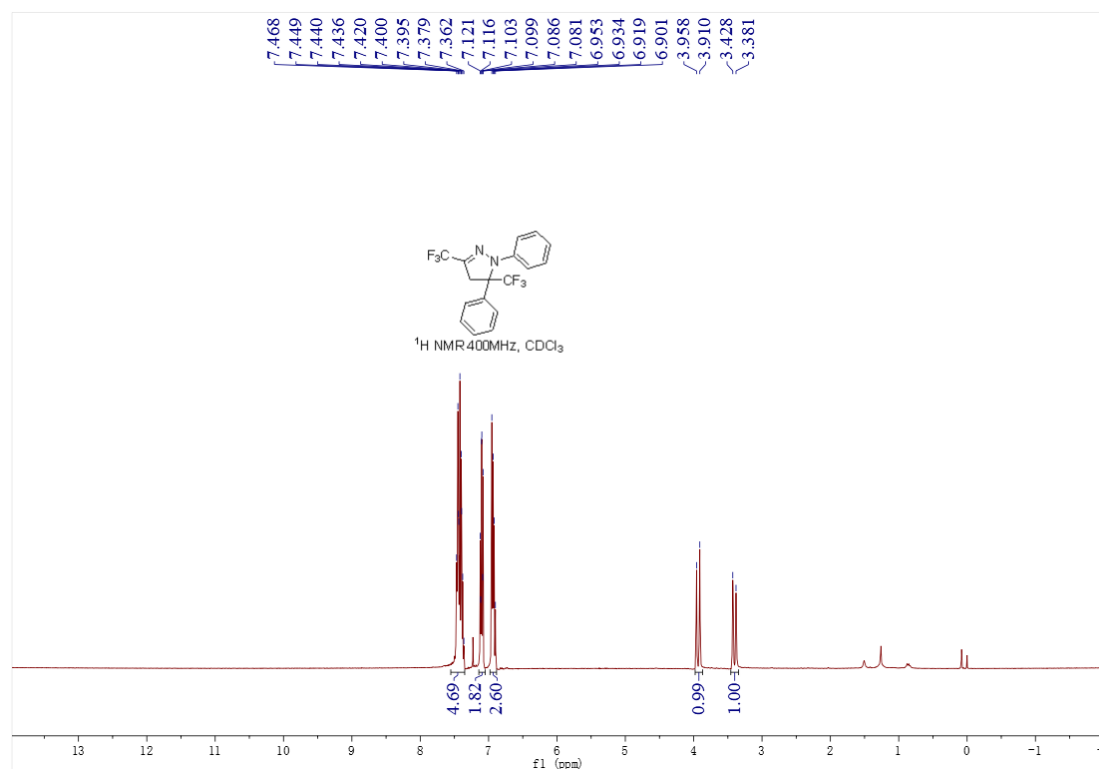

<sup>13</sup>C NMR copy of compound **4h'**

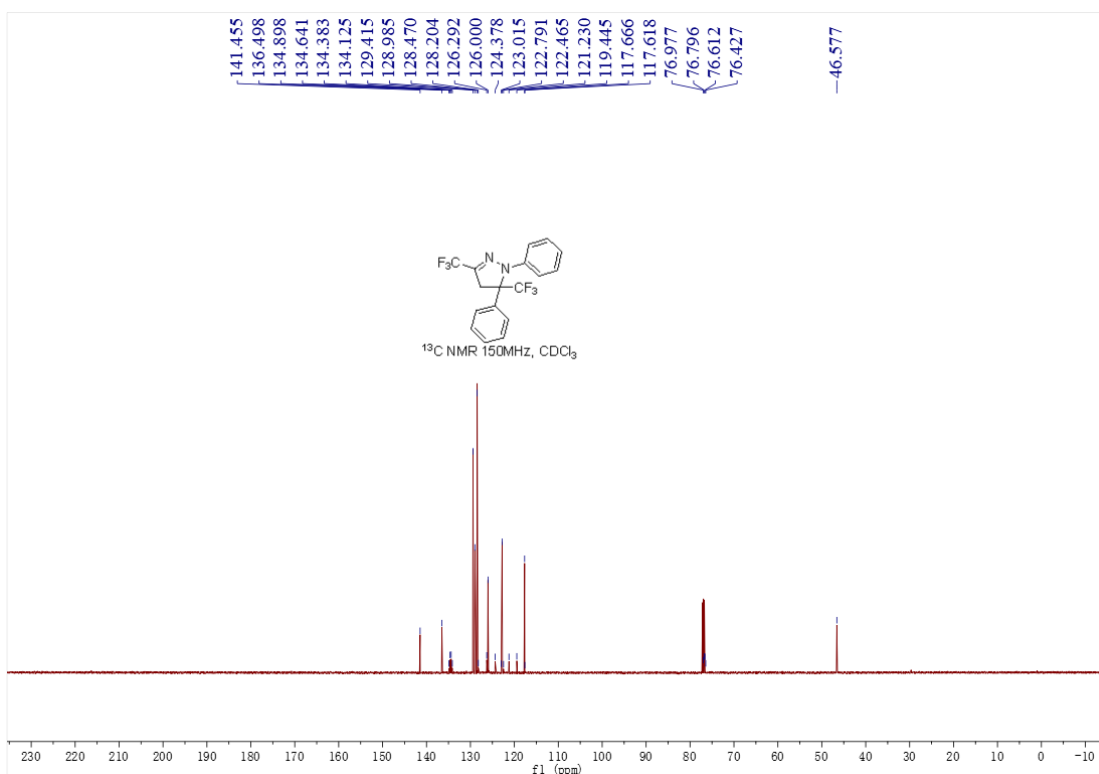

<sup>19</sup>F NMR copy of compound **4h'**

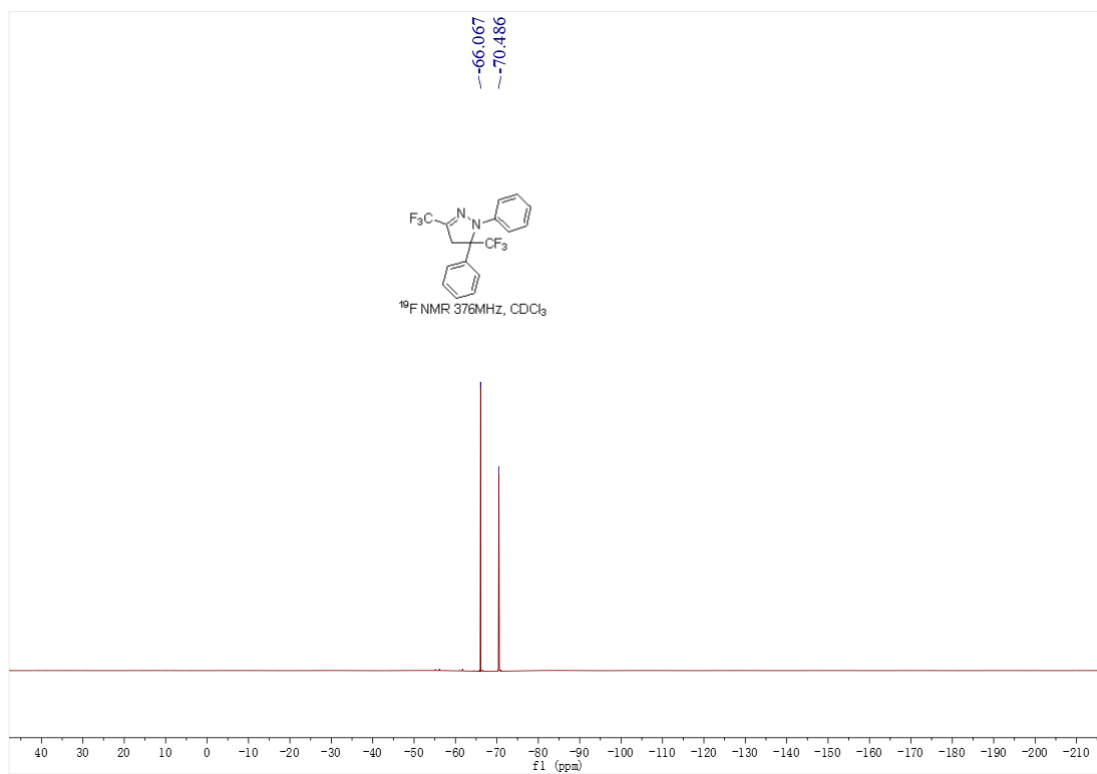

HRMS copy of compound 4h'

ZHAOSHUJUAN-38 #25-71 RT: 0.11-0.32 AV: 47 NL: 1.63E8  
T: FTMS + p ESI Full lock ms [50.0000-750.0000]

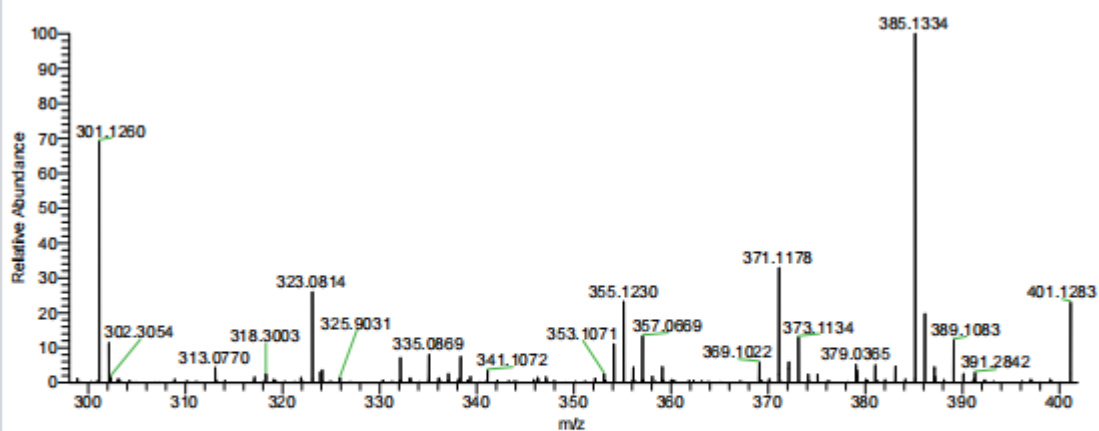

ZHAOSHUJUAN-38#25-71 RT: 0.11-0.32 AV: 47  
T: FTMS + p ESI Full lock ms [50.0000-750.0000]  
m/z = 358.6937-359.4923

| m/z      | Intensity | Relative | Theo. Mass | Delta (ppm) | Composition                                                   |
|----------|-----------|----------|------------|-------------|---------------------------------------------------------------|
| 359.0729 | 199744.6  | 2.72     | 359.0977   | -24.86      | C <sub>17</sub> H <sub>13</sub> N <sub>2</sub> F <sub>6</sub> |
| 359.0977 | 7339133.0 | 100.00   | 359.0977   | -0.04       | C <sub>17</sub> H <sub>13</sub> N <sub>2</sub> F <sub>6</sub> |
| 359.1373 | 1124881.5 | 15.33    | 359.0977   | 39.60       | C <sub>17</sub> H <sub>13</sub> N <sub>2</sub> F <sub>6</sub> |
| 359.3055 | 376228.3  | 5.13     | 359.0977   | 207.72      | C <sub>17</sub> H <sub>13</sub> N <sub>2</sub> F <sub>6</sub> |
| 359.3159 | 157297.0  | 2.14     | 359.0977   | 218.13      | C <sub>17</sub> H <sub>13</sub> N <sub>2</sub> F <sub>6</sub> |

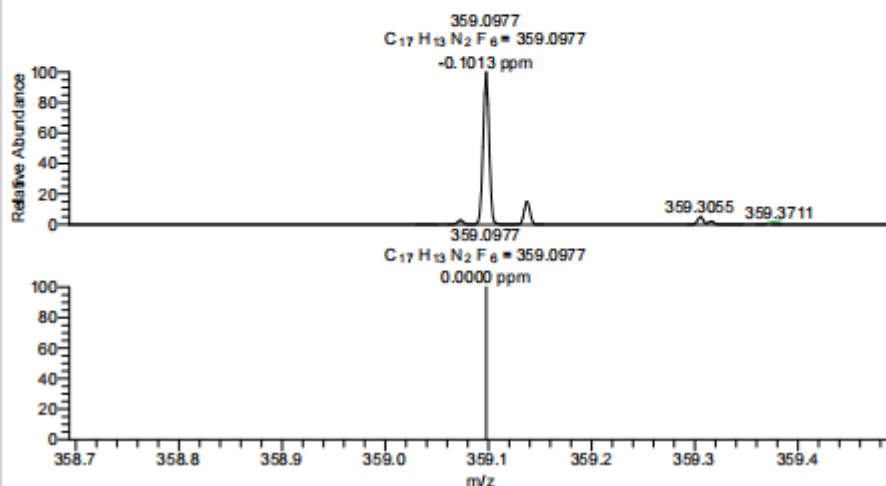

NL:  
7.33E6  
ZHAOSHUJUAN-38#25-71 RT: 0.11-0.32 AV: 47 T: FTMS + p ESI Full lock ms [50.0000-750.0000]

NL:  
8.26E5  
C<sub>17</sub>H<sub>13</sub>F<sub>6</sub>N<sub>2</sub>:  
C<sub>17</sub>H<sub>13</sub>F<sub>6</sub>N<sub>2</sub>:  
pa Chrg 1



Spectrogram copies of compound **4i'**

<sup>1</sup>H NMR copy of compound **4i'**

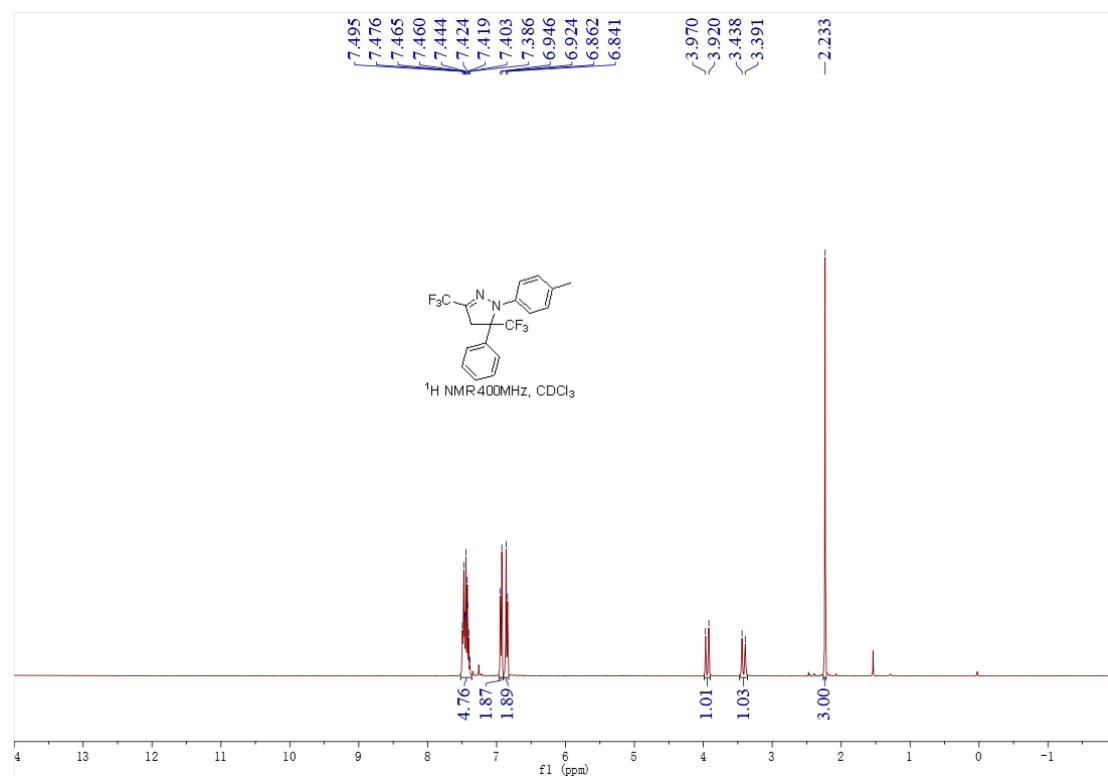

<sup>13</sup>C NMR copy of compound **4i'**

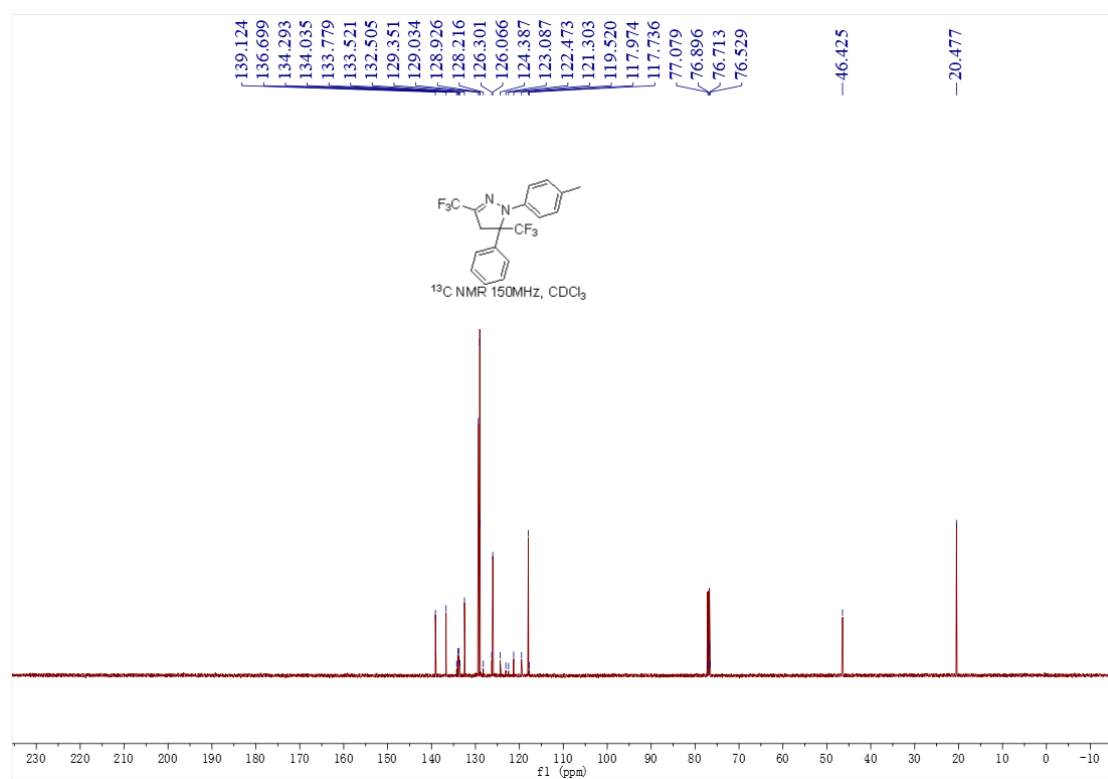

<sup>19</sup>F NMR copy of compound **4i'**

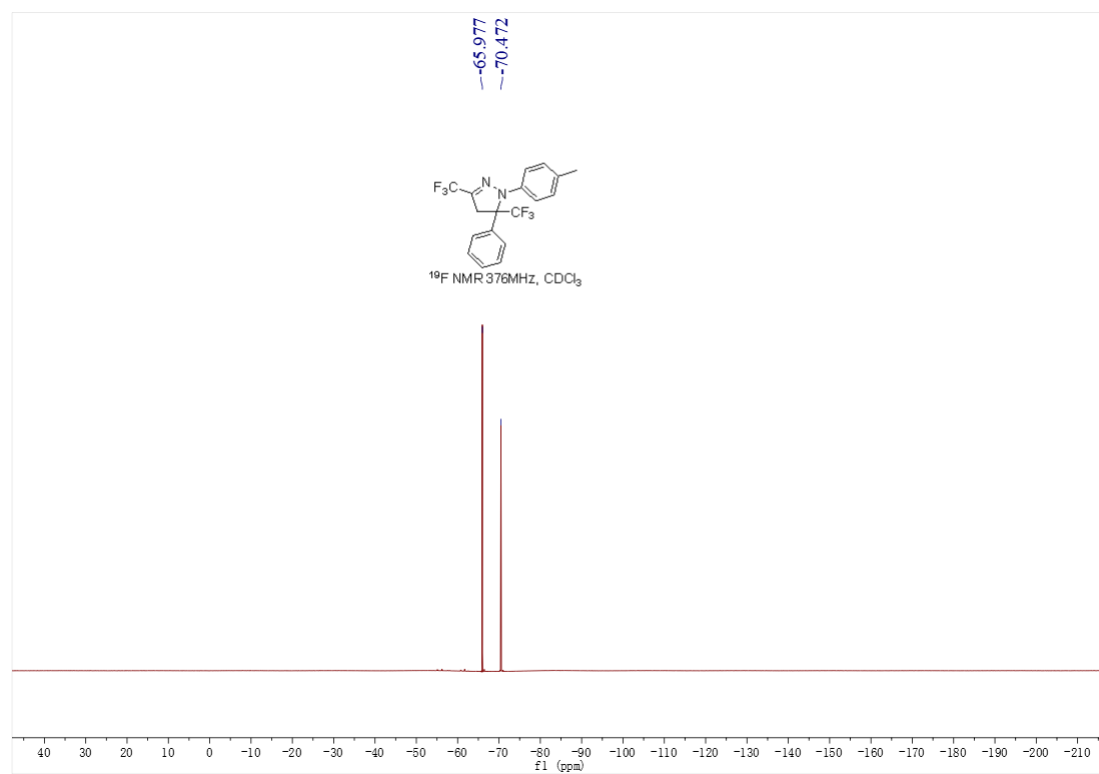

HRMS copy of compound 4i'

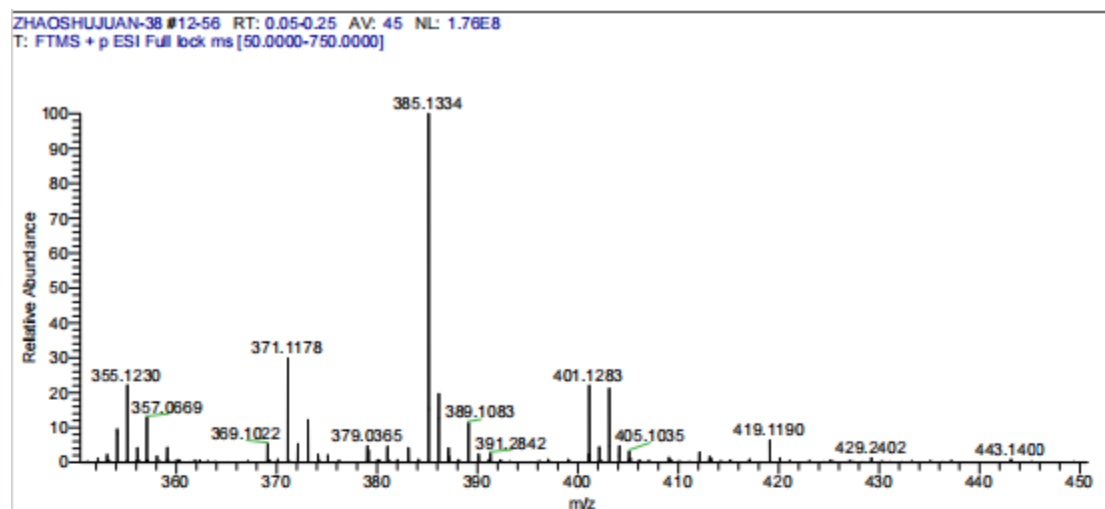

ZHAOSHUJUAN-38#12-56 RT: 0.05-0.25 AV: 45  
T: FTMS + p ESI Full lock ms [50.0000-750.0000]  
m/z = 372.1398-374.0108

| m/z      | Intensity  | Relative | Theo. Mass | Delta (ppm) | Composition                                                   |
|----------|------------|----------|------------|-------------|---------------------------------------------------------------|
| 372.2739 | 21883.6    | 0.10     |            |             |                                                               |
| 372.3475 | 4559.2     | 0.02     |            |             |                                                               |
| 373.0620 | 107603.9   | 0.49     | 373.1134   | -51.42      | C <sub>18</sub> H <sub>15</sub> N <sub>2</sub> F <sub>6</sub> |
| 373.0998 | 31789.6    | 0.15     | 373.1134   | -13.60      | C <sub>18</sub> H <sub>15</sub> N <sub>2</sub> F <sub>6</sub> |
| 373.1135 | 21883934.0 | 100.00   | 373.1134   | 0.07        | C <sub>18</sub> H <sub>15</sub> N <sub>2</sub> F <sub>6</sub> |

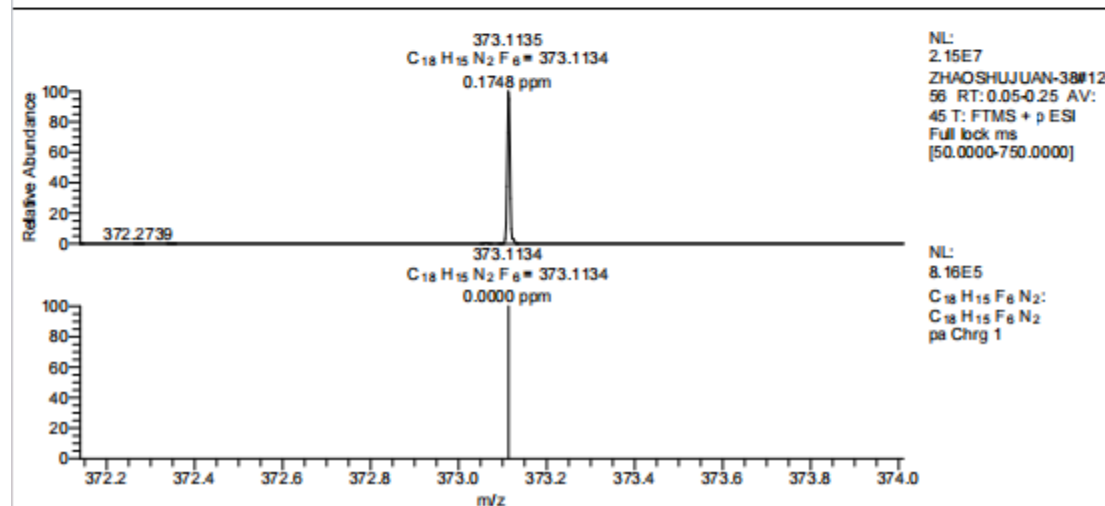

Spectrogram copies of compound **B**

$^1\text{H}$  NMR copy of compound **B**

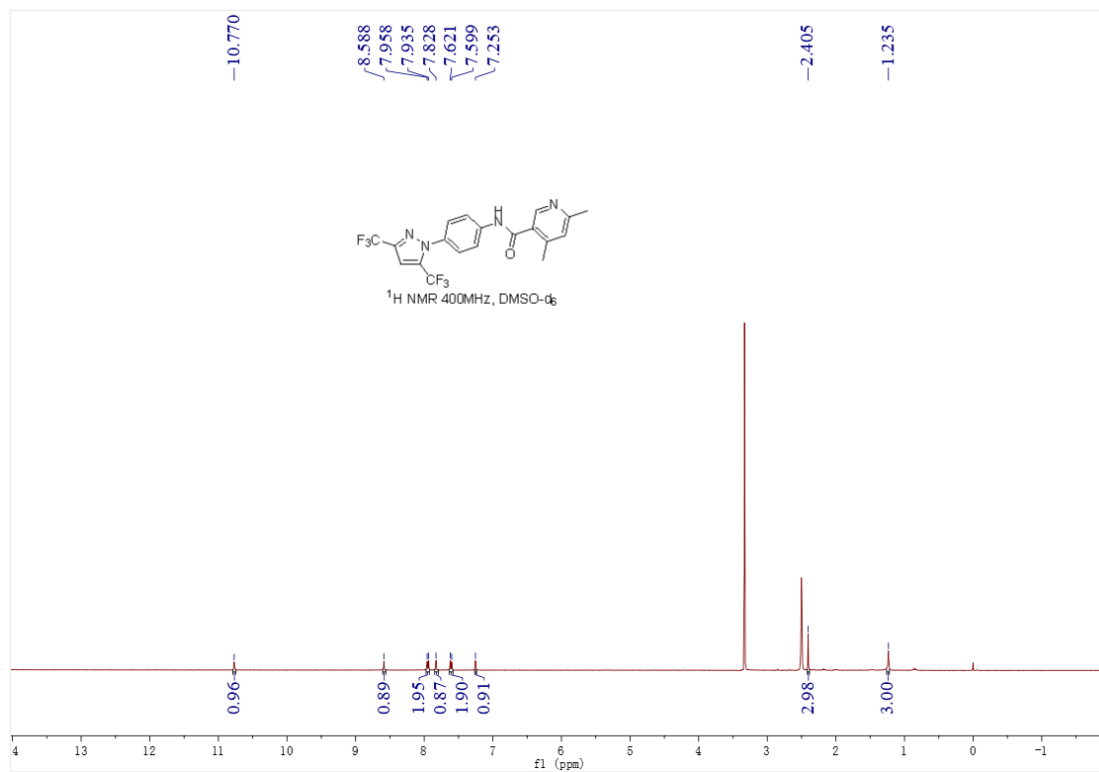

# HRMS copy of compound B

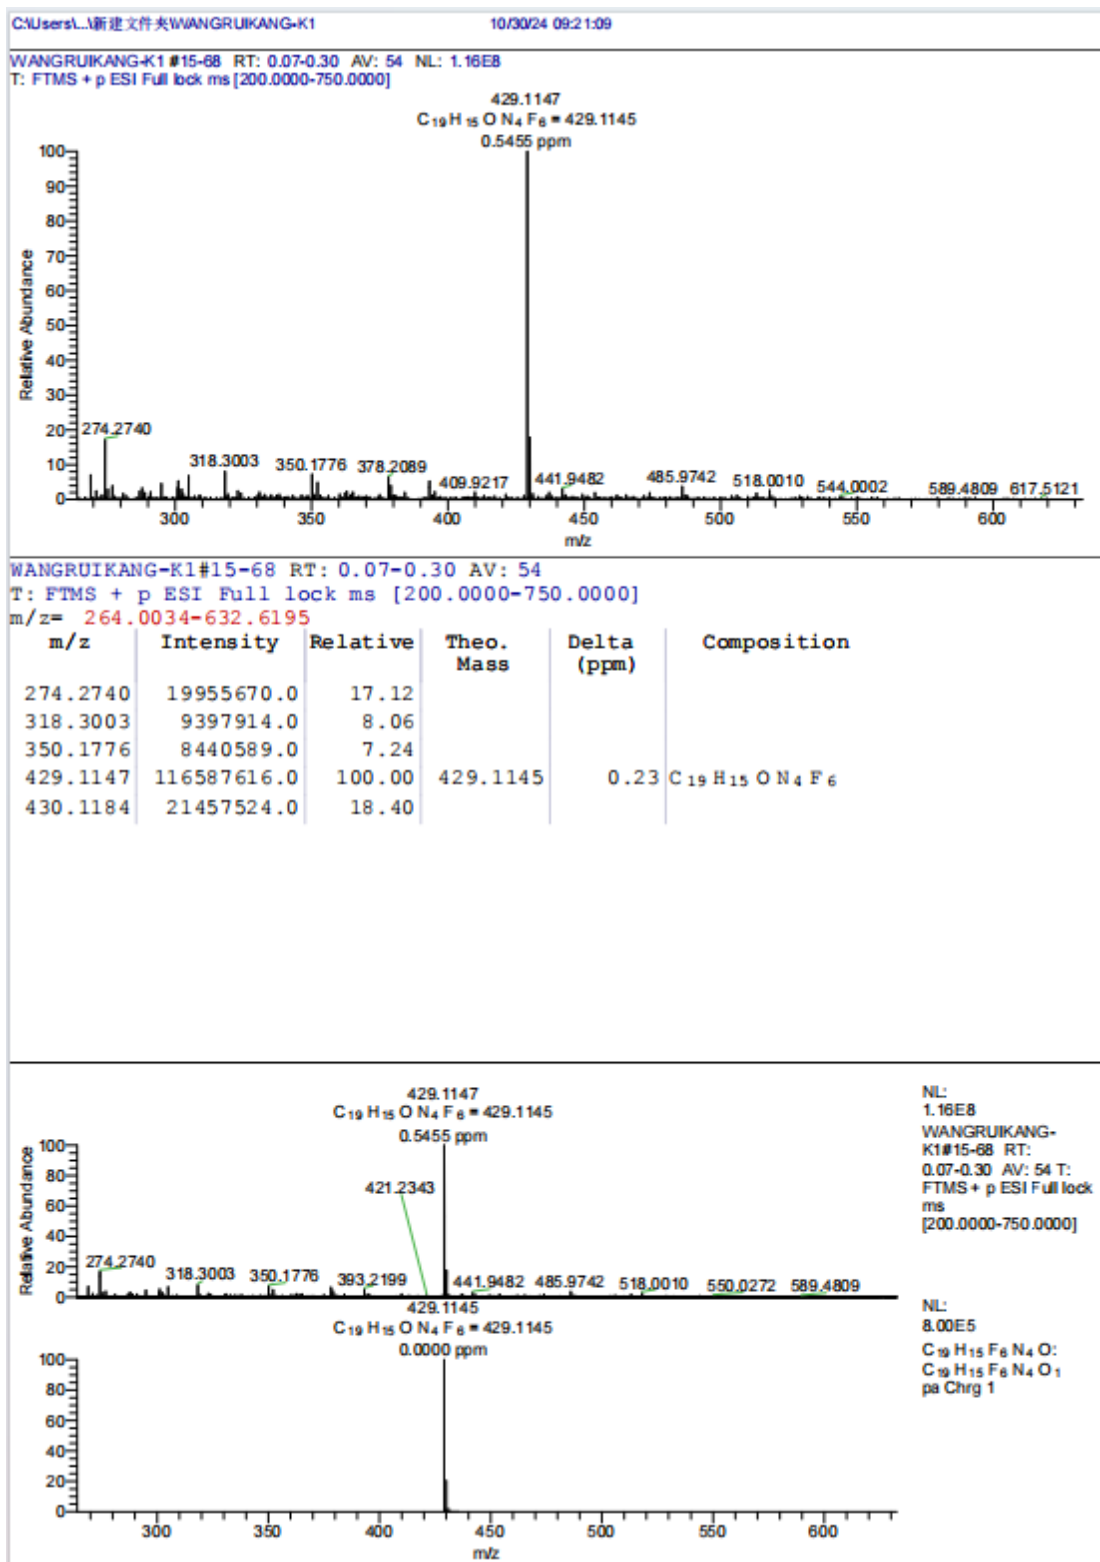

### 3. X-Ray Crystallographic Data of Compounds **3n** and **4j**

#### Compound **3n**

Thermal ellipsoids are set at a 50% probability level. Crystal data have been deposited to CCDC, number 2313274.

#### Crystallization Details

The obtained compound **3n** (35 mg) was dissolved in THF (0.2 mL) in a NMR tube at room temperature. Then petroleum ether (2 mL) was added to the solution slowly along the tube wall, resulting in a two-phase mixture. The colorless crystal of **3n** was formed after the two-phase mixture has diffused.

#### Experimental

A suitable crystal was selected and placed on a ROD, Synergy Custom system, HyPix diffractometer. The crystal was kept at 150.00(10) K during data collection. Using Olex<sup>2</sup>, the structure was solved with the ShelXT structure solution program using Intrinsic Phasing and refined with the ShelXL refinement package using Least Squares minimisation.

#### Experimental

A suitable crystal was selected and compound **3n** on a ROD, Synergy Custom system, HyPix diffractometer. The crystal was kept at 300.27(10) K during data collection. Using Olex2 [1], the structure was solved with the SHELXT [2] structure solution program using Intrinsic Phasing and refined with the SHELXL [3] refinement package using Least Squares minimisation.

1. Dolomanov, O.V., Bourhis, L.J., Gildea, R.J, Howard, J.A.K. & Puschmann, H. (2009), *J. Appl. Cryst.* 42, 339-341.
2. Sheldrick, G.M. (2015). *Acta Cryst.* A71, 3-8.
3. Sheldrick, G.M. (2015). *Acta Cryst.* C71, 3-8.

## Crystal structure determination of compound 3n

**Crystal Data** for  $C_{13}H_{10}BrF_5N_2$  ( $M = 369.14$  g/mol): monoclinic, space group P2/n (no. 13),  $a = 17.6937(9)$  Å,  $b = 4.5126(2)$  Å,  $c = 18.7442(10)$  Å,  $\beta = 105.041(5)$ ,  $V = 1445.35(13)$  Å<sup>3</sup>,  $Z = 4$ ,  $T = 300.27(10)$  K,  $\mu(\text{Cu K}\alpha) = 4.376$  mm<sup>-1</sup>,  $D_{\text{calc}} = 1.696$  g/cm<sup>3</sup>, 8115 reflections measured ( $6.122^\circ \leq 2\Theta \leq 154.342^\circ$ ), 2870 unique ( $R_{\text{int}} = 0.0543$ ,  $R_{\text{sigma}} = 0.0641$ ) which were used in all calculations. The final  $R_1$  was 0.0619 ( $I > 2\sigma(I)$ ) and  $wR_2$  was 0.1963 (all data).

## Refinement model description

Number of restraints - 24, number of constraints - unknown.

Details:

### 1. Fixed Uiso

At 1.2 times of:

All C(H) groups, All C(H,H) groups

At 1.5 times of:

All C(H,H,H) groups

### 2. Uiso/Uanis restraints and constraints

$U_{\text{anis}}(\text{F4}) \approx U_{\text{eq}}$ ,  $U_{\text{anis}}(\text{F4B}) \approx U_{\text{eq}}$ ,  $U_{\text{anis}}(\text{F5}) \approx U_{\text{eq}}$ ,  $U_{\text{anis}}(\text{F5B})$

$\approx U_{\text{eq}}$ : with sigma of 0.004 and sigma for terminal atoms of 0.002

### 3. Others

Fixed Sof: F4(0.7) F4B(0.3) F5(0.5) F5B(0.5) H5A(0.5) H5B(0.5)

### 4.a Ternary CH refined with riding coordinates:

C5(H5A), C5(H5B)

### 4.b Aromatic/amide H refined with riding coordinates:

C2(H2), C6(H6), C12(H12)

4.c Idealised Me refined as rotating group:

C3(H3A,H3B,H3C), C11(H11A,H11B,H11C)

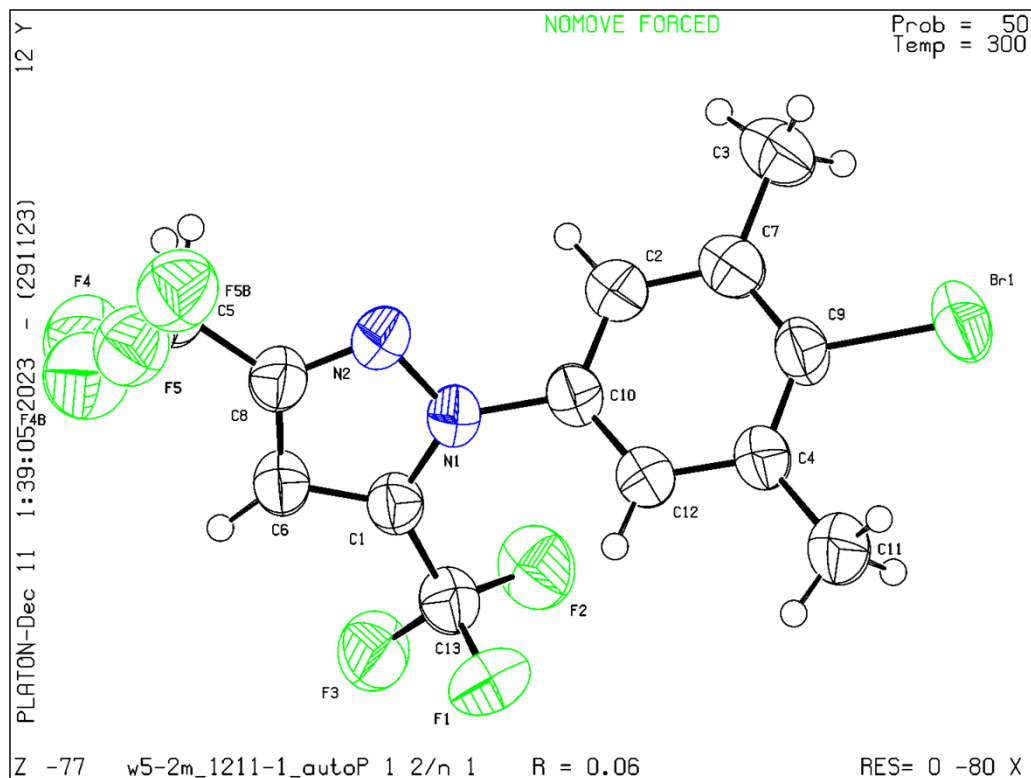



| <b>Table S1 Crystal data and structure refinement for compound 3n.</b> |                                                                 |
|------------------------------------------------------------------------|-----------------------------------------------------------------|
| Identification code                                                    | compound <b>3n</b>                                              |
| Empirical formula                                                      | C <sub>13</sub> H <sub>10</sub> BrF <sub>5</sub> N <sub>2</sub> |
| Formula weight                                                         | 369.14                                                          |
| Temperature/K                                                          | 300.27(10)                                                      |
| Crystal system                                                         | monoclinic                                                      |
| Space group                                                            | P2/n                                                            |
| a/Å                                                                    | 17.6937(9)                                                      |
| b/Å                                                                    | 4.5126(2)                                                       |
| c/Å                                                                    | 18.7442(10)                                                     |
| α/°                                                                    | 90                                                              |
| β/°                                                                    | 105.041(5)                                                      |
| γ/°                                                                    | 90                                                              |
| Volume/Å <sup>3</sup>                                                  | 1445.35(13)                                                     |
| Z                                                                      | 4                                                               |
| ρ <sub>calc</sub> /g/cm <sup>3</sup>                                   | 1.696                                                           |
| μ/mm <sup>-1</sup>                                                     | 4.376                                                           |
| F(000)                                                                 | 728.0                                                           |
| Crystal size/mm <sup>3</sup>                                           | 0.15 × 0.06 × 0.05                                              |
| Radiation                                                              | Cu Kα (λ = 1.54184)                                             |
| 2θ range for data collection/°                                         | 6.122 to 154.342                                                |
| Index ranges                                                           | -22 ≤ h ≤ 21, -5 ≤ k ≤ 2, -23 ≤ l ≤ 23                          |
| Reflections collected                                                  | 8115                                                            |
| Independent reflections                                                | 2870 [R <sub>int</sub> = 0.0543, R <sub>sigma</sub> = 0.0641]   |
| Data/restraints/parameters                                             | 2870/24/210                                                     |
| Goodness-of-fit on F <sup>2</sup>                                      | 1.107                                                           |
| Final R indexes [I >= 2σ (I)]                                          | R <sub>1</sub> = 0.0619, wR <sub>2</sub> = 0.1805               |
| Final R indexes [all data]                                             | R <sub>1</sub> = 0.0764, wR <sub>2</sub> = 0.1962               |
| Largest diff. peak/hole / e Å <sup>-3</sup>                            | 0.62/-0.60                                                      |

**Table S2 Fractional Atomic Coordinates ( $\times 10^4$ ) and Equivalent Isotropic Displacement Parameters ( $\text{\AA}^2 \times 10^3$ ) for compound 3n.  $U_{\text{eq}}$  is defined as 1/3 of the trace of the orthogonalised  $U_{\text{IJ}}$  tensor.**

| Atom | x          | y          | z          | U(eq)     |
|------|------------|------------|------------|-----------|
| Br1  | 8698.7(3)  | 1227.0(15) | 6755.0(3)  | 85.9(3)   |
| F1   | 4973.6(19) | 3181(6)    | 4349.6(17) | 78.0(8)   |
| F2   | 5571(2)    | -886(6)    | 4303(2)    | 87.3(9)   |
| F3   | 4567.2(19) | 284(8)     | 3435.9(18) | 90.7(9)   |
| F4   | 5749(4)    | 4838(14)   | 1331(3)    | 108.4(16) |
| F4B  | 5674(9)    | 6870(40)   | 1485(9)    | 110(4)    |
| F5   | 6133(5)    | 8730(14)   | 1812(4)    | 86.0(17)  |
| F5B  | 6638(6)    | 8787(15)   | 2029(5)    | 96(2)     |
| N1   | 6486(2)    | 3380(7)    | 3741.2(19) | 55.6(8)   |
| N2   | 6787(2)    | 4588(9)    | 3213(2)    | 62.8(9)   |
| C1   | 5710(2)    | 2831(8)    | 3472(2)    | 52.2(8)   |
| C2   | 7685(3)    | 1273(9)    | 4508(3)    | 61.1(10)  |
| C3   | 8950(3)    | -905(15)   | 5236(4)    | 91.1(17)  |
| C4   | 7312(3)    | 3422(9)    | 5777(2)    | 58.7(9)   |
| C5   | 6329(4)    | 5965(12)   | 1924(3)    | 75.8(13)  |
| C6   | 5496(3)    | 3731(9)    | 2754(2)    | 58.9(10)  |
| C7   | 8201(3)    | 760(10)    | 5186(3)    | 64.5(10)  |
| C8   | 6190(3)    | 4802(10)   | 2626(2)    | 61.6(10)  |
| C9   | 8001(3)    | 1877(10)   | 5807(2)    | 59.8(10)  |
| C10  | 7001(2)    | 2836(9)    | 4459(2)    | 54.9(9)   |
| C11  | 7098(4)    | 4572(15)   | 6450(3)    | 84.4(15)  |
| C12  | 6816(3)    | 3906(9)    | 5079(2)    | 58.8(10)  |
| C13  | 5211(3)    | 1378(8)    | 3895(3)    | 58.0(9)   |

**Table S3 Anisotropic Displacement Parameters ( $\text{\AA}^2 \times 10^3$ ) for compound 3n. The Anisotropic displacement factor exponent takes the form:  $2 \pi^2 [h^2 a^{*2} U_{11} + 2hka^* b^* U_{12} + \dots]$ .**

| Atom | $U_{11}$ | $U_{22}$ | $U_{33}$ | $U_{23}$  | $U_{13}$ | $U_{12}$  |
|------|----------|----------|----------|-----------|----------|-----------|
| Br1  | 68.9(4)  | 109.8(5) | 63.3(4)  | 4.7(3)    | -10.9(3) | 11.2(3)   |
| F1   | 89(2)    | 77.7(15) | 80.6(19) | -10.6(13) | 45.4(17) | -8.3(14)  |
| F2   | 93(2)    | 67.9(14) | 99(2)    | 28.3(14)  | 21.5(18) | -0.8(14)  |
| F3   | 70.1(18) | 126(2)   | 69.3(19) | -5.3(17)  | 6.8(14)  | -33.3(17) |
| F4   | 115(2)   | 114(2)   | 95(2)    | 8.4(17)   | 24.7(17) | -8.7(17)  |
| F4B  | 110(4)   | 113(4)   | 108(4)   | 4(2)      | 29(2)    | 3(2)      |
| F5   | 95(2)    | 81(2)    | 83(2)    | 8.1(17)   | 25.5(18) | -0.1(18)  |
| F5B  | 102(3)   | 95(2)    | 94(3)    | 6.8(18)   | 31.5(19) | -2.2(18)  |
| N1   | 53.1(18) | 68.8(18) | 43.2(17) | 9.2(14)   | 9.6(14)  | 2.8(14)   |
| N2   | 61(2)    | 81(2)    | 48.3(19) | 8.3(16)   | 17.8(16) | -0.1(17)  |
| C1   | 52(2)    | 55.9(18) | 45.8(19) | -1.0(16)  | 8.1(16)  | 1.7(16)   |
| C2   | 54(2)    | 73(2)    | 56(2)    | -0.6(19)  | 13.5(19) | 3.1(18)   |
| C3   | 63(3)    | 118(4)   | 88(4)    | 0(3)      | 12(3)    | 29(3)     |
| C4   | 52(2)    | 72(2)    | 47(2)    | -2.4(17)  | 4.6(17)  | 2.4(17)   |
| C5   | 85(3)    | 86(3)    | 55(3)    | 13(2)     | 17(2)    | 14(2)     |
| C6   | 59(2)    | 69(2)    | 46(2)    | 1.7(17)   | 7.7(18)  | 7.2(18)   |
| C7   | 53(2)    | 72(2)    | 66(3)    | 0(2)      | 12(2)    | 5.7(19)   |
| C8   | 66(3)    | 68(2)    | 50(2)    | 7.9(18)   | 15.2(19) | 10.6(19)  |
| C9   | 51(2)    | 72(2)    | 49(2)    | 5.4(18)   | -1.0(17) | -0.9(17)  |
| C10  | 50(2)    | 63(2)    | 49(2)    | 3.6(17)   | 6.4(17)  | 1.3(16)   |
| C11  | 74(3)    | 122(4)   | 53(3)    | -7(3)     | 8(2)     | 17(3)     |
| C12  | 52(2)    | 72(2)    | 51(2)    | 1.3(18)   | 10.0(18) | 8.4(18)   |
| C13  | 58(2)    | 55.8(19) | 56(2)    | 4.1(17)   | 8.7(19)  | -3.5(16)  |

| Atom | Atom | Length/Å  | Atom | Atom | Length/Å |
|------|------|-----------|------|------|----------|
| Br1  | C9   | 1.905(4)  | C1   | C6   | 1.363(6) |
| F1   | C13  | 1.323(5)  | C1   | C13  | 1.483(6) |
| F2   | C13  | 1.335(5)  | C2   | C7   | 1.378(7) |
| F3   | C13  | 1.332(5)  | C2   | C10  | 1.383(6) |
| F4   | C5   | 1.398(9)  | C3   | C7   | 1.506(7) |
| F4B  | C5   | 1.301(16) | C4   | C9   | 1.393(6) |
| F5   | C5   | 1.297(8)  | C4   | C11  | 1.500(7) |
| F5B  | C5   | 1.380(9)  | C4   | C12  | 1.390(6) |
| N1   | N2   | 1.354(5)  | C5   | C8   | 1.495(7) |
| N1   | C1   | 1.357(5)  | C6   | C8   | 1.396(7) |
| N1   | C10  | 1.436(5)  | C7   | C9   | 1.395(7) |
| N2   | C8   | 1.317(6)  | C10  | C12  | 1.375(6) |

| Atom | Atom | Atom | Angle/°  | Atom | Atom | Atom | Angle/°  |
|------|------|------|----------|------|------|------|----------|
| N2   | N1   | C1   | 110.8(3) | C2   | C7   | C9   | 117.2(4) |
| N2   | N1   | C10  | 118.6(3) | C9   | C7   | C3   | 122.5(5) |
| C1   | N1   | C10  | 130.7(3) | N2   | C8   | C5   | 118.8(4) |
| C8   | N2   | N1   | 104.9(4) | N2   | C8   | C6   | 112.4(4) |
| N1   | C1   | C6   | 107.9(4) | C6   | C8   | C5   | 128.7(4) |
| N1   | C1   | C13  | 124.6(4) | C4   | C9   | Br1  | 117.6(3) |
| C6   | C1   | C13  | 127.5(4) | C4   | C9   | C7   | 123.7(4) |
| C7   | C2   | C10  | 120.5(4) | C7   | C9   | Br1  | 118.6(3) |
| C9   | C4   | C11  | 123.2(4) | C2   | C10  | N1   | 118.8(4) |
| C12  | C4   | C9   | 116.6(4) | C12  | C10  | N1   | 119.9(4) |
| C12  | C4   | C11  | 120.1(4) | C12  | C10  | C2   | 121.2(4) |
| F4   | C5   | C8   | 108.5(5) | C10  | C12  | C4   | 120.7(4) |
| F4B  | C5   | F5B  | 93.2(8)  | F1   | C13  | F2   | 106.6(4) |
| F4B  | C5   | C8   | 110.1(8) | F1   | C13  | F3   | 106.4(4) |
| F5   | C5   | F4   | 96.4(6)  | F1   | C13  | C1   | 113.9(3) |
| F5   | C5   | C8   | 112.5(5) | F2   | C13  | C1   | 112.5(4) |
| F5B  | C5   | C8   | 110.4(5) | F3   | C13  | F2   | 106.7(3) |
| C1   | C6   | C8   | 104.0(4) | F3   | C13  | C1   | 110.3(4) |
| C2   | C7   | C3   | 120.2(5) |      |      |      |          |

| <b>Table S6 Torsion Angles for compound 3n.</b> |          |          |          |                |          |          |          |          |                |  |
|-------------------------------------------------|----------|----------|----------|----------------|----------|----------|----------|----------|----------------|--|
| <b>A</b>                                        | <b>B</b> | <b>C</b> | <b>D</b> | <b>Angle/°</b> | <b>A</b> | <b>B</b> | <b>C</b> | <b>D</b> | <b>Angle/°</b> |  |
| F4                                              | C5       | C8       | N2       | 154.4(5)       | C1       | C6       | C8       | C5       | 177.0(5)       |  |
| F4                                              | C5       | C8       | C6       | -22.4(7)       | C2       | C7       | C9       | Br1      | -179.8(3)      |  |
| F4B                                             | C5       | C8       | N2       | -160.6(9)      | C2       | C7       | C9       | C4       | 1.0(7)         |  |
| F4B                                             | C5       | C8       | C6       | 22.7(10)       | C2       | C10      | C12      | C4       | -0.5(7)        |  |
| F5                                              | C5       | C8       | N2       | -100.2(7)      | C3       | C7       | C9       | Br1      | -0.8(7)        |  |
| F5                                              | C5       | C8       | C6       | 83.0(8)        | C3       | C7       | C9       | C4       | -180.0(5)      |  |
| F5B                                             | C5       | C8       | N2       | -59.1(7)       | C6       | C1       | C13      | F1       | -102.2(5)      |  |
| F5B                                             | C5       | C8       | C6       | 124.2(6)       | C6       | C1       | C13      | F2       | 136.3(4)       |  |
| N1                                              | N2       | C8       | C5       | -177.7(4)      | C6       | C1       | C13      | F3       | 17.3(6)        |  |
| N1                                              | N2       | C8       | C6       | -0.5(5)        | C7       | C2       | C10      | N1       | 178.7(4)       |  |
| N1                                              | C1       | C6       | C8       | 0.4(4)         | C7       | C2       | C10      | C12      | -0.2(7)        |  |
| N1                                              | C1       | C13      | F1       | 80.7(5)        | C9       | C4       | C12      | C10      | 1.4(6)         |  |
| N1                                              | C1       | C13      | F2       | -40.7(6)       | C10      | N1       | N2       | C8       | 179.6(4)       |  |
| N1                                              | C1       | C13      | F3       | -159.7(4)      | C10      | N1       | C1       | C6       | -179.4(4)      |  |
| N1                                              | C10      | C12      | C4       | -179.4(4)      | C10      | N1       | C1       | C13      | -1.8(7)        |  |
| N2                                              | N1       | C1       | C6       | -0.7(5)        | C10      | C2       | C7       | C3       | -179.1(5)      |  |
| N2                                              | N1       | C1       | C13      | 176.9(4)       | C10      | C2       | C7       | C9       | 0.0(7)         |  |
| N2                                              | N1       | C10      | C2       | -51.5(5)       | C11      | C4       | C9       | Br1      | -0.2(6)        |  |
| N2                                              | N1       | C10      | C12      | 127.5(4)       | C11      | C4       | C9       | C7       | 179.0(5)       |  |
| C1                                              | N1       | N2       | C8       | 0.7(5)         | C11      | C4       | C12      | C10      | -179.3(5)      |  |
| C1                                              | N1       | C10      | C2       | 127.1(5)       | C12      | C4       | C9       | Br1      | 179.1(3)       |  |
| C1                                              | N1       | C10      | C12      | -53.9(6)       | C12      | C4       | C9       | C7       | -1.6(7)        |  |
| C1                                              | C6       | C8       | N2       | 0.1(5)         | C13      | C1       | C6       | C8       | -177.1(4)      |  |

**Table S7 Hydrogen Atom Coordinates ( $\text{\AA} \times 10^4$ ) and Isotropic Displacement Parameters ( $\text{\AA}^2 \times 10^3$ ) for compound 3n.**

| Atom     | x       | y        | z       | U(eq) |
|----------|---------|----------|---------|-------|
| H2       | 7797.6  | 563.3    | 4081.71 | 73    |
| H3A      | 8936.42 | -1769.23 | 4765.03 | 137   |
| H3B      | 9007.58 | -2442    | 5600.41 | 137   |
| H3C      | 9385.13 | 436.11   | 5375.22 | 137   |
| H5A      | 6858.97 | 5559.18  | 1880.52 | 91    |
| H5B      | 6623.46 | 4606.43  | 1689.4  | 91    |
| H6       | 5002.85 | 3650.54  | 2424.58 | 71    |
| H11<br>A | 6614.97 | 5649.64  | 6302.42 | 127   |
| H11B     | 7504.56 | 5862.27  | 6718.36 | 127   |
| H11C     | 7038.78 | 2939.06  | 6758.91 | 127   |
| H12      | 6354.96 | 4965.76  | 5031.12 | 71    |

**Table S8 Atomic Occupancy for compound 3n.**

| Atom | Occupancy | Atom | Occupancy | Atom | Occupancy |
|------|-----------|------|-----------|------|-----------|
| F4   | 0.7       | F4B  | 0.3       | F5   | 0.5       |
| F5B  | 0.5       | H5A  | 0.5       | H5B  | 0.5       |

## Compound 4j

Thermal ellipsoids are set at a 50% probability level. Crystal data have been deposited to CCDC, number 2380999.

## Crystallization Details

The obtained compound **4j** (30 mg) was dissolved in THF (0.2 mL) in a NMR tube at room temperature. Then petroleum ether (2 mL) was added to the solution slowly along the tube wall, resulting in a two-phase mixture. The colorless crystal of compound **4j** was formed after the two-phase mixture has diffused.

## Experimental

Single crystals of  $C_{17}H_{12}BrF_5N_2$  [**compound 4j**] were []. A suitable crystal was selected and [] on a **XtaLAB Synergy R, DW system, HyPix** diffractometer. The crystal was kept at 149.99(10) K during data collection. Using Olex2 [1], the structure was solved with the SHELXT [2] structure solution program using Intrinsic Phasing and refined with the SHELXL [3] refinement package using Least Squares minimisation.

1. Dolomanov, O.V., Bourhis, L.J., Gildea, R.J, Howard, J.A.K. & Puschmann, H. (2009), *J. Appl. Cryst.* 42, 339-341.
2. Sheldrick, G.M. (2015). *Acta Cryst.* A71, 3-8.
3. Sheldrick, G.M. (2015). *Acta Cryst.* C71, 3-8.

## Crystal structure determination of [compound 4j]

**Crystal Data** for  $C_{17}H_{12}BrF_5N_2$  ( $M = 419.20$  g/mol): triclinic, space group P-1 (no. 2),  $a = 7.4520(4)$  Å,  $b = 10.0443(4)$  Å,  $c = 11.7716(5)$  Å,  $\alpha = 86.890(3)$ ,  $\beta = 73.961(4)$ ,  $\gamma = 70.172(4)$ ,  $V = 795.85(7)$  Å<sup>3</sup>,  $Z = 2$ ,  $T = 149.99(10)$  K,  $\mu(\text{Cu K}\alpha) = 4.064$  mm<sup>-1</sup>,  $D_{\text{calc}} = 1.749$  g/cm<sup>3</sup>, 8425 reflections measured ( $7.822^\circ \leq 2\theta \leq 151.838^\circ$ ), 3125 unique ( $R_{\text{int}} = 0.0251$ ,  $R_{\text{sigma}} = 0.0198$ ) which were used in all calculations. The final  $R_1$  was 0.0300 ( $I > 2\sigma(I)$ ) and  $wR_2$  was 0.0750 (all data).

## Refinement model description

Number of restraints - 0, number of constraints - unknown.

Details:

1. Fixed Uiso

At 1.2 times of:

All C(H) groups, All C(H,H) groups

2.a Ternary CH refined with riding coordinates:

C3(H3)

2.b Secondary CH2 refined with riding coordinates:

C5(H5A,H5B)

2.c Aromatic/amide H refined with riding coordinates:

C2(H2), C6(H6), C7(H7), C8(H8), C11(H11), C14(H14), C15(H15), C16(H16),

C17(H17)

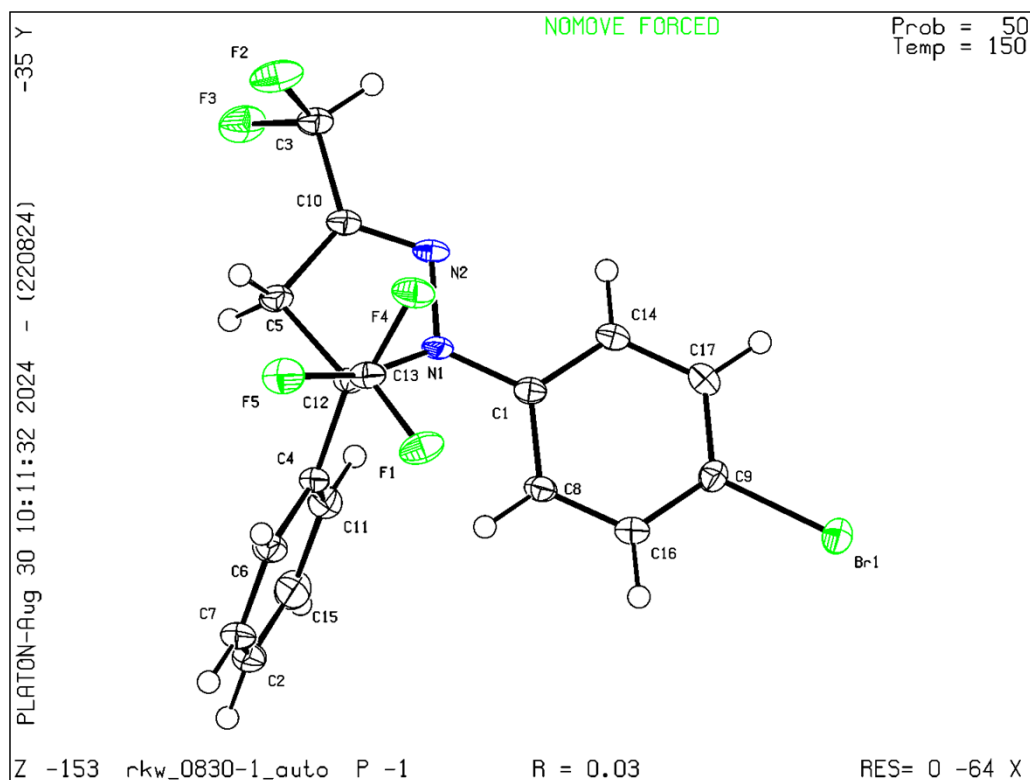



| <b>Table S9 Crystal data and structure refinement for compound 4j.</b> |                                                                 |
|------------------------------------------------------------------------|-----------------------------------------------------------------|
| Identification code                                                    | compound <b>4j</b>                                              |
| Empirical formula                                                      | C <sub>17</sub> H <sub>12</sub> BrF <sub>5</sub> N <sub>2</sub> |
| Formula weight                                                         | 419.20                                                          |
| Temperature/K                                                          | 149.99(10)                                                      |
| Crystal system                                                         | triclinic                                                       |
| Space group                                                            | P-1                                                             |
| a/Å                                                                    | 7.4520(4)                                                       |
| b/Å                                                                    | 10.0443(4)                                                      |
| c/Å                                                                    | 11.7716(5)                                                      |
| α/°                                                                    | 86.890(3)                                                       |
| β/°                                                                    | 73.961(4)                                                       |
| γ/°                                                                    | 70.172(4)                                                       |
| Volume/Å <sup>3</sup>                                                  | 795.85(7)                                                       |
| Z                                                                      | 2                                                               |
| ρ <sub>calc</sub> /cm <sup>3</sup>                                     | 1.749                                                           |
| μ/mm <sup>-1</sup>                                                     | 4.064                                                           |
| F(000)                                                                 | 416.0                                                           |
| Crystal size/mm <sup>3</sup>                                           | 0.18 × 0.15 × 0.12                                              |
| Radiation                                                              | Cu Kα (λ = 1.54184)                                             |
| 2θ range for data collection/°                                         | 7.822 to 151.838                                                |
| Index ranges                                                           | -8 ≤ h ≤ 9, -12 ≤ k ≤ 12, -14 ≤ l ≤ 14                          |
| Reflections collected                                                  | 8425                                                            |
| Independent reflections                                                | 3125 [R <sub>int</sub> = 0.0251, R <sub>sigma</sub> = 0.0198]   |
| Data/restraints/parameters                                             | 3125/0/226                                                      |
| Goodness-of-fit on F <sup>2</sup>                                      | 1.076                                                           |
| Final R indexes [I >= 2σ (I)]                                          | R <sub>1</sub> = 0.0300, wR <sub>2</sub> = 0.0748               |
| Final R indexes [all data]                                             | R <sub>1</sub> = 0.0306, wR <sub>2</sub> = 0.0750               |
| Largest diff. peak/hole / e Å <sup>-3</sup>                            | 0.39/-0.56                                                      |

**Table S10 Fractional Atomic Coordinates ( $\times 10^4$ ) and Equivalent Isotropic Displacement Parameters ( $\text{\AA}^2 \times 10^3$ ) for compound 4j.  $U_{eq}$  is defined as 1/3 of the trace of the orthogonalised  $U_{ij}$  tensor.**

| Atom | x           | y           | z           | U(eq)    |
|------|-------------|-------------|-------------|----------|
| Br1  | 2735.6(3)   | 3553.2(2)   | 6780.0(2)   | 25.57(9) |
| F1   | 3987.0(17)  | 9335.9(13)  | 7659.0(11)  | 26.0(3)  |
| F2   | 9209(2)     | 8349.8(15)  | 10819.8(12) | 34.9(3)  |
| F3   | 11976.8(18) | 7174.9(16)  | 9581.3(12)  | 32.7(3)  |
| F4   | 4684.7(18)  | 9022.5(14)  | 9327.4(10)  | 26.5(3)  |
| F5   | 5293.8(19)  | 10697.4(12) | 8234.6(11)  | 27.0(3)  |
| N1   | 7535(2)     | 6868.5(17)  | 7962.2(14)  | 17.4(3)  |
| N2   | 8340(2)     | 6463.0(18)  | 8909.9(14)  | 18.5(3)  |
| C1   | 6413(3)     | 6106(2)     | 7700.1(16)  | 16.2(4)  |
| C2   | 9631(4)     | 8567(3)     | 3844.1(19)  | 29.1(5)  |
| C3   | 10084(3)    | 7200(2)     | 10054.1(18) | 20.8(4)  |
| C4   | 8141(3)     | 8451(2)     | 6289.3(16)  | 16.8(4)  |
| C5   | 8879(3)     | 8580(2)     | 8271.6(18)  | 20.6(4)  |
| C6   | 7345(3)     | 9652(2)     | 5698.2(18)  | 21.5(4)  |
| C7   | 8089(3)     | 9698(2)     | 4483.4(19)  | 26.7(5)  |
| C8   | 5611(3)     | 6449(2)     | 6732.7(17)  | 18.2(4)  |
| C9   | 4223(3)     | 4584(2)     | 7166.0(17)  | 18.4(4)  |
| C10  | 9068(3)     | 7386(2)     | 9099.6(17)  | 18.4(4)  |
| C11  | 9705(3)     | 7311(2)     | 5639.1(18)  | 21.7(4)  |
| C12  | 7447(3)     | 8329(2)     | 7628.4(16)  | 16.2(4)  |
| C13  | 5327(3)     | 9352(2)     | 8208.8(17)  | 19.9(4)  |
| C14  | 6121(3)     | 4978(2)     | 8380.1(17)  | 18.0(4)  |
| C15  | 10439(3)    | 7371(3)     | 4429(2)     | 28.2(5)  |
| C16  | 4503(3)     | 5696(2)     | 6479.5(17)  | 19.4(4)  |
| C17  | 5034(3)     | 4216(2)     | 8114.0(18)  | 20.3(4)  |

**Table S11 Anisotropic Displacement Parameters ( $\text{\AA}^2 \times 10^3$ ) for compound 4j. The Anisotropic displacement factor exponent takes the form:  $-2\pi^2[h^2a^{*2}U_{11}+2hka^*b^*U_{12}+\dots]$ .**

| Atom | $U_{11}$  | $U_{22}$  | $U_{33}$  | $U_{23}$ | $U_{13}$   | $U_{12}$   |
|------|-----------|-----------|-----------|----------|------------|------------|
| Br1  | 30.21(14) | 24.72(14) | 28.68(14) | 4.02(9)  | -12.24(10) | -15.06(10) |
| F1   | 19.9(6)   | 30.7(7)   | 23.9(6)   | -5.8(5)  | -10.0(5)   | 0.0(5)     |
| F2   | 35.3(7)   | 42.0(8)   | 21.7(6)   | -10.0(6) | -11.3(5)   | -1.3(6)    |
| F3   | 18.1(6)   | 48.1(8)   | 30.4(7)   | 1.5(6)   | -10.3(5)   | -6.3(6)    |
| F4   | 26.4(6)   | 33.5(7)   | 14.7(6)   | -0.1(5)  | -2.5(5)    | -6.3(5)    |
| F5   | 33.5(7)   | 17.1(6)   | 26.0(6)   | -3.2(5)  | -10.2(5)   | -0.7(5)    |
| N1   | 23.2(8)   | 17.8(8)   | 14.8(8)   | 6.0(6)   | -11.3(6)   | -7.2(6)    |
| N2   | 19.8(8)   | 21.0(8)   | 13.7(8)   | 4.1(6)   | -9.0(6)    | -2.7(6)    |
| C1   | 16.2(8)   | 16.4(9)   | 13.1(8)   | -0.8(7)  | -3.1(7)    | -2.4(7)    |
| C2   | 35.7(12)  | 46.4(14)  | 14.7(9)   | 4.5(9)   | -6.1(9)    | -26.8(11)  |
| C3   | 20.6(9)   | 24.1(10)  | 18.0(9)   | 2.9(8)   | -9.2(8)    | -5.1(8)    |
| C4   | 18.8(9)   | 19.6(9)   | 13.8(9)   | 3.0(7)   | -6.7(7)    | -7.5(7)    |
| C5   | 24.6(10)  | 21.4(10)  | 19.5(9)   | 4.5(8)   | -12.9(8)   | -7.6(8)    |
| C6   | 25.2(10)  | 20.6(10)  | 20.3(10)  | 5.3(8)   | -10.9(8)   | -6.7(8)    |
| C7   | 34.6(11)  | 34.0(12)  | 21.1(10)  | 11.9(9)  | -16.5(9)   | -18.1(10)  |
| C8   | 22.7(9)   | 18.3(9)   | 13.9(9)   | 3.2(7)   | -6.8(7)    | -6.2(7)    |
| C9   | 18.2(9)   | 18.5(9)   | 19.2(9)   | -1.7(7)  | -4.4(7)    | -7.2(7)    |
| C10  | 18.2(9)   | 21.4(9)   | 14.8(9)   | 2.5(7)   | -7.2(7)    | -3.9(7)    |
| C11  | 19.3(9)   | 22.9(10)  | 22.2(10)  | 2.2(8)   | -6.1(8)    | -6.0(8)    |
| C12  | 19.6(9)   | 15.0(9)   | 14.2(9)   | 2.8(7)   | -7.3(7)    | -4.5(7)    |
| C13  | 23.4(9)   | 20.1(9)   | 15.0(9)   | -0.4(7)  | -7.5(7)    | -3.8(8)    |
| C14  | 18.6(9)   | 18.7(9)   | 14.9(9)   | 2.8(7)   | -5.5(7)    | -3.4(7)    |
| C15  | 24.1(10)  | 35.6(12)  | 23.5(11)  | -6.1(9)  | 0.9(8)     | -13.1(9)   |
| C16  | 20.9(9)   | 20.9(9)   | 15.4(9)   | 1.2(7)   | -6.5(7)    | -4.7(8)    |
| C17  | 21.1(9)   | 19.1(9)   | 19.1(9)   | 4.3(7)   | -3.9(8)    | -6.7(7)    |

| <b>Table S12 Bond Lengths for compound 4j.</b> |             |                 |             |             |                 |
|------------------------------------------------|-------------|-----------------|-------------|-------------|-----------------|
| <b>Atom</b>                                    | <b>Atom</b> | <b>Length/Å</b> | <b>Atom</b> | <b>Atom</b> | <b>Length/Å</b> |
| Br1                                            | C9          | 1.9007(19)      | C3          | C10         | 1.490(3)        |
| F1                                             | C13         | 1.336(2)        | C4          | C6          | 1.394(3)        |
| F2                                             | C3          | 1.360(2)        | C4          | C11         | 1.397(3)        |
| F3                                             | C3          | 1.358(2)        | C4          | C12         | 1.529(3)        |
| F4                                             | C13         | 1.336(2)        | C5          | C10         | 1.498(3)        |
| F5                                             | C13         | 1.345(2)        | C5          | C12         | 1.557(3)        |
| N1                                             | N2          | 1.388(2)        | C6          | C7          | 1.388(3)        |
| N1                                             | C1          | 1.408(3)        | C8          | C16         | 1.388(3)        |
| N1                                             | C12         | 1.483(2)        | C9          | C16         | 1.383(3)        |
| N2                                             | C10         | 1.278(3)        | C9          | C17         | 1.387(3)        |
| C1                                             | C8          | 1.402(3)        | C11         | C15         | 1.384(3)        |
| C1                                             | C14         | 1.395(3)        | C12         | C13         | 1.548(3)        |
| C2                                             | C7          | 1.381(4)        | C14         | C17         | 1.388(3)        |
| C2                                             | C15         | 1.388(3)        |             |             |                 |

| <b>Table S13 Bond Angles for compound 4j.</b> |             |             |                |             |             |             |                |
|-----------------------------------------------|-------------|-------------|----------------|-------------|-------------|-------------|----------------|
| <b>Atom</b>                                   | <b>Atom</b> | <b>Atom</b> | <b>Angle/°</b> | <b>Atom</b> | <b>Atom</b> | <b>Atom</b> | <b>Angle/°</b> |
| N2                                            | N1          | C1          | 118.18(15)     | N2          | C10         | C3          | 120.32(18)     |
| N2                                            | N1          | C12         | 111.54(15)     | N2          | C10         | C5          | 114.85(17)     |
| C1                                            | N1          | C12         | 127.07(15)     | C3          | C10         | C5          | 124.79(18)     |
| C10                                           | N2          | N1          | 108.63(16)     | C15         | C11         | C4          | 120.5(2)       |
| C8                                            | C1          | N1          | 120.47(17)     | N1          | C12         | C4          | 112.39(15)     |
| C14                                           | C1          | N1          | 120.61(17)     | N1          | C12         | C5          | 101.33(14)     |
| C14                                           | C1          | C8          | 118.91(18)     | N1          | C12         | C13         | 108.40(15)     |
| C7                                            | C2          | C15         | 119.3(2)       | C4          | C12         | C5          | 112.08(16)     |
| F2                                            | C3          | C10         | 109.87(16)     | C4          | C12         | C13         | 113.71(15)     |
| F3                                            | C3          | F2          | 104.96(17)     | C13         | C12         | C5          | 108.13(15)     |
| F3                                            | C3          | C10         | 109.54(16)     | F1          | C13         | F5          | 107.00(16)     |
| C6                                            | C4          | C11         | 118.80(18)     | F1          | C13         | C12         | 113.87(16)     |
| C6                                            | C4          | C12         | 123.47(18)     | F4          | C13         | F1          | 106.99(16)     |
| C11                                           | C4          | C12         | 117.69(17)     | F4          | C13         | F5          | 107.12(16)     |
| C10                                           | C5          | C12         | 101.00(15)     | F4          | C13         | C12         | 110.45(16)     |
| C7                                            | C6          | C4          | 120.2(2)       | F5          | C13         | C12         | 111.08(17)     |
| C2                                            | C7          | C6          | 120.8(2)       | C17         | C14         | C1          | 120.64(18)     |
| C16                                           | C8          | C1          | 120.25(18)     | C11         | C15         | C2          | 120.4(2)       |
| C16                                           | C9          | Br1         | 119.02(15)     | C9          | C16         | C8          | 120.03(18)     |
| C16                                           | C9          | C17         | 120.44(18)     | C9          | C17         | C14         | 119.72(18)     |
| C17                                           | C9          | Br1         | 120.54(15)     |             |             |             |                |

| <b>Table S14 Torsion Angles for compound 4j.</b> |          |          |          |                |          |          |          |          |                |
|--------------------------------------------------|----------|----------|----------|----------------|----------|----------|----------|----------|----------------|
| <b>A</b>                                         | <b>B</b> | <b>C</b> | <b>D</b> | <b>Angle/°</b> | <b>A</b> | <b>B</b> | <b>C</b> | <b>D</b> | <b>Angle/°</b> |
| Br1                                              | C9       | C16      | C8       | -178.94(14)    | C4       | C12      | C13      | F5       | -72.2(2)       |
| Br1                                              | C9       | C17      | C14      | 179.80(14)     | C5       | C12      | C13      | F1       | 173.85(16)     |
| F2                                               | C3       | C10      | N2       | -123.6(2)      | C5       | C12      | C13      | F4       | -65.7(2)       |
| F2                                               | C3       | C10      | C5       | 58.9(3)        | C5       | C12      | C13      | F5       | 53.0(2)        |
| F3                                               | C3       | C10      | N2       | 121.6(2)       | C6       | C4       | C11      | C15      | -0.5(3)        |
| F3                                               | C3       | C10      | C5       | -55.9(3)       | C6       | C4       | C12      | N1       | 146.01(18)     |
| N1                                               | N2       | C10      | C3       | -178.43(17)    | C6       | C4       | C12      | C5       | -100.6(2)      |
| N1                                               | N2       | C10      | C5       | -0.7(2)        | C6       | C4       | C12      | C13      | 22.4(3)        |
| N1                                               | C1       | C8       | C16      | -179.86(17)    | C7       | C2       | C15      | C11      | 0.2(3)         |
| N1                                               | C1       | C14      | C17      | -179.27(17)    | C8       | C1       | C14      | C17      | -0.8(3)        |
| N1                                               | C12      | C13      | F1       | -77.1(2)       | C10      | C5       | C12      | N1       | -14.57(18)     |
| N1                                               | C12      | C13      | F4       | 43.3(2)        | C10      | C5       | C12      | C4       | -134.60(16)    |
| N1                                               | C12      | C13      | F5       | 162.05(15)     | C10      | C5       | C12      | C13      | 99.28(17)      |
| N2                                               | N1       | C1       | C8       | -178.30(17)    | C11      | C4       | C6       | C7       | 0.6(3)         |
| N2                                               | N1       | C1       | C14      | 0.2(3)         | C11      | C4       | C12      | N1       | -36.4(2)       |
| N2                                               | N1       | C12      | C4       | 135.75(16)     | C11      | C4       | C12      | C5       | 77.0(2)        |
| N2                                               | N1       | C12      | C5       | 15.94(19)      | C11      | C4       | C12      | C13      | -159.98(17)    |
| N2                                               | N1       | C12      | C13      | -97.71(17)     | C12      | N1       | N2       | C10      | -10.3(2)       |
| C1                                               | N1       | N2       | C10      | -171.56(17)    | C12      | N1       | C1       | C8       | 23.7(3)        |
| C1                                               | N1       | C12      | C4       | -65.1(2)       | C12      | N1       | C1       | C14      | -157.80(18)    |
| C1                                               | N1       | C12      | C5       | 175.11(17)     | C12      | C4       | C6       | C7       | 178.25(19)     |
| C1                                               | N1       | C12      | C13      | 61.5(2)        | C12      | C4       | C11      | C15      | -178.22(19)    |
| C1                                               | C8       | C16      | C9       | -1.4(3)        | C12      | C5       | C10      | N2       | 10.4(2)        |
| C1                                               | C14      | C17      | C9       | -0.3(3)        | C12      | C5       | C10      | C3       | -172.01(18)    |
| C4                                               | C6       | C7       | C2       | -0.4(3)        | C14      | C1       | C8       | C16      | 1.6(3)         |
| C4                                               | C11      | C15      | C2       | 0.1(3)         | C15      | C2       | C7       | C6       | 0.0(3)         |
| C4                                               | C12      | C13      | F1       | 48.7(2)        | C16      | C9       | C17      | C14      | 0.5(3)         |
| C4                                               | C12      | C13      | F4       | 169.10(16)     | C17      | C9       | C16      | C8       | 0.4(3)         |

**Table S15 Hydrogen Atom Coordinates ( $\text{\AA}\times 10^4$ ) and Isotropic Displacement Parameters ( $\text{\AA}^2\times 10^3$ ) for compound 4j.**

| Atom | x        | y        | z        | U(eq) |
|------|----------|----------|----------|-------|
| H2   | 10133.47 | 8605.98  | 3012.89  | 35    |
| H3   | 10061.5  | 6313.65  | 10479.18 | 25    |
| H5A  | 10174.86 | 8510.79  | 7711.31  | 25    |
| H5B  | 8295.64  | 9512.39  | 8706.14  | 25    |
| H6   | 6289.84  | 10440.16 | 6127.73  | 26    |
| H7   | 7531.42  | 10518.36 | 4087.01  | 32    |
| H8   | 5826.72  | 7198.54  | 6248.87  | 22    |
| H11  | 10269.75 | 6488.32  | 6030.96  | 26    |
| H14  | 6671.22  | 4728.6   | 9031.7   | 22    |
| H15  | 11502.01 | 6588.99  | 3995.62  | 34    |
| H16  | 3936.29  | 5945.75  | 5834.31  | 23    |
| H17  | 4847.28  | 3445.91  | 8579.08  | 24    |
